# Supplementary material for: Workflow to Investigate Subtle Differences in Wine Volatile Metabolome Induced by Different Root Systems and Irrigation Regimes
Source: Preprints.org preprint supplement (doi:10.20944/preprints202109.0081.v1), 2021-09-06
Supplement: Supplementary file 3 [file supplementary]

## Sheet: table 1
	Table 1 showing Interaction effects between Rootstocks and Irrigation Treatments in wines in 2017 and 2018
		2017
	Compounds	Full1103P	Full3309C	FullSO4	FullOwn	RDI1103P	RDI3309C	RDISO4	RDIOwn	None1103P	None3309C	NoneSO4	NoneOwn	p-value
	Isoamyl acetate	407.07 b	1080.8 a	391.23 b	381.78 b	559.54 b	553.16 b	431.51 b	244.89 b	449.21 b	573.54 b	483.35 b	386 b	0.0222
	Ethyl heptanoate	397.72 c	295.13 cd	422.74 c	589.47 ab	203.13 d	443.01 bc	367.94 c	640.7 a	363.84 c	352.71 c	366.3 c	583.18 ab	0.0337
	Ethyl octanoate	38.31 c	26.74 cd	44.68 bc	67.11 a	15.64 d	44.3 bc	38.01 c	76.61 a	37.91 c	35.08 cd	37.33 c	61.12 ab	0.0383
	1-octanol	15.84 cd	15.67 cd	14.48 cd	14.28 cd	19.38 a	15.92 cd	16.3 bcd	13.56 d	14.94 cd	16.71 bc	18.72 ab	13.99 cd	0.00161
	1-Nonanol	12.26 ab	13.15 ab	12.57 ab	12.28 ab	14.53 a	12.25 ab	14.74 a	11.004 b	12.66 ab	15.24 a	12.94 ab	12.53 ab	0.0962
	Ethyl hydrocinnamate	2.98 bc	2.52 bcde	1.93 cdef	1.62 def	4.69 a	2.55 bcde	2.71 bcd	1.35 f	2.68 bcd	2.17 bcdef	3.15 b	1.46 ef	0.00371
	1-Dodecanol	0.41 abcd	0.308 bcd	0.43 abc	0.46 ab	0.288 cd	0.40 abcd	0.31 bcd	0.43 abc	0.49 a	0.27 d	0.38 abcd	0.46 ab	0.0338
	Biphenyl	0.02 b	0.029 b	0.026 b	0.02 b	0.025 b	0.035 b	0.02 b	0.021 b	0.03 b	0.027 b	0.03 b	0.056 a	0.052
	Ethyl-tetradecenoate (Ethyl myristate)	42.6 bc	46.6 bc	46.6 bc	52.17 bc	56.78 ab	69.31 a	48.28 bc	36.9 c	55.21 ab	44.72 bc	55.87 ab	40.84 bc	0.00456
	Ethyl hexadecanoate (Ethyl palmitate)	192.44 bc	168.61 bc	186.51 bc	234.08 abc	249 ab	317.94 a	222.5 bc	153.09 bc	249.51 ab	145.18 c	238.76 abc	185.27 bc	0.00169
	Isoamyl hexanoate	1.62 bc	1.54 bc	1.36 cd	1.3 cd	2.28 a	1.82 b	1.62 bc	1.01 d	1.54 bc	1.89 b	1.83 b	1.24 cd	0.00059
	2-phenylethyl acetate	1.56 bc	35.17 bcd	28.62 cde	28.17 cde	60.41 a	41.76 bc	39.84 bcd	15.73 e	35.15 bcd	46.69 b	39.05 bcd	24.87 de	0.0018
		2018
	Linalool	15.56 a	11.54 bcd	9.69 cd	8.41 de	16.13 a	10.61 bcd	11.36 bcd	5.6 e	11.46 bcd	12.11 bc	13.4 ab	6.14 e	0.00465

## Sheet: supplemental table 1
Table S1: List of the metabolic features identified from XCMS online that are significantly different between rootstocks in wines 2017.
Features	f.value	p.value	FDR	Fisher's LSD	8A2a	8A2b-1	8A3a	8A3b	8B3a	8B3b	8C2a	8C2b	8C3a	8C3b	8D2a	8D2b	8D3a	8D3b	9A2a	9A2b	9A3a	9A3b	9B2a	9B2b	9B3a	9B3b	9C2a	9C2b	9C3a	9C3b	9D3a	9D3b	10A2a	10A2b	10A3a	10A3b	10B3a	10B3b	10C2a	10C2b	10C3a	10C3b	10D2a	10D2b	10D3a	10D3b	11A2a	11A2b	11A3a
M88/1050	7.6593	9.2861e-05	0.00052002	1103P - own; 1103P - so4; 3309C - own; so4 - own	80181.3	69349.3	173741	182437	116054	109184	102848	112421	77962.7	80242.4	54565.4	57076.7	59049.5	66058.7	44950.5	41297.9	56127.9	54438.6	570021	531382	316715	299550	157435	162482	49721.1	52607.9	61958.2	56053.4	214965	194975	249267	185195	59762.8	66766.4	73094.6	70106.1	111457	146505	8523	6223.49	580924	624870	214970	206563	487505
M74/1080	3.6409	0.014534	0.029439	own - 1103P; own - 3309C	996840	1.19512e+06	871336	865671	417480	813470	1.09834e+06	1.17364e+06	1.49691e+06	1.28426e+06	2.53675e+06	1.39113e+06	1.75541e+06	1.30968e+06	1.46067e+06	1.48976e+06	1.54417e+06	1.28559e+06	575106	633951	866322	806164	537855	1.18942e+06	1.27855e+06	1.12708e+06	1.18301e+06	433407	630608	1.07019e+06	765848	563902	1.05753e+06	1.84586e+06	974487	923898	1.12021e+06	1.05586e+06	133397	51506	307714	575278	1.21512e+06	984157	580265
M55/1100	3.2996	0.022485	0.044596	3309C - 1103P; 3309C - own; 3309C - so4	2.2655e+06	4.0263e+06	3.7866e+06	3.81569e+06	8.55285e+06	6.78809e+06	2.42834e+06	2.63064e+06	9.04736e+06	5.77025e+06	1.67254e+07	1.97662e+06	2.02757e+06	2.27624e+06	3.18439e+06	1.94663e+06	2.34678e+06	2.14023e+06	1.22969e+07	5.6799e+06	5.7665e+06	5.78185e+06	4.14317e+06	2.93977e+06	3.76899e+06	7.70159e+06	1.93197e+06	8.24055e+06	2.99616e+06	2.75132e+06	5.66655e+06	1.07407e+07	1.76189e+06	1.96926e+06	4.57908e+06	4.93859e+06	4.79966e+06	2.59757e+06	247364	281349	1.56111e+07	1.6899e+07	3.4911e+06	3.33431e+06	1.79603e+07
M43/1100	4.1147	0.0079345	0.016786	3309C - 1103P; 3309C - own; 3309C - so4	949140	1.52485e+06	1.73066e+06	389914	1.88729e+06	1.65258e+06	1.04493e+06	961141	1.59554e+06	562373	2.18375e+06	598954	704356	998913	1.0709e+06	676644	457482	716875	5.06105e+06	1.23635e+06	2.4063e+06	325332	845132	813349	756794	1.02726e+06	503128	643857	1.27531e+06	1.10075e+06	2.59692e+06	3.70042e+06	733754	752677	1.88755e+06	1.7161e+06	2.09628e+06	1.14319e+06	32929.7	51860.2	1.79855e+06	7.23274e+06	1.6187e+06	1.36189e+06	7.65524e+06
M71/1100	4.6571	0.0039747	0.0094142	3309C - own; 3309C - so4	125949	213956	230736	236885	204886	338017	139092	153610	148480	126955	135301	105181	101267	123776	177859	99845.1	129526	118773	683861	367047	369377	373617	185223	174007	202240	132068	106294	116977	169612	162813	355232	565559	94639.2	99849.5	219278	224777	252128	153869	5636.54	5836.24	1.06949e+06	1.1645e+06	213343	201472	1.13454e+06
M73/1100	4.5507	0.0045509	0.010415	3309C - own; 3309C - so4	342011	569208	608649	618311	668700	930271	370368	408499	502614	330384	812007	277546	283706	345448	453407	264528	339824	313132	1.77994e+06	949079	944898	964556	503534	459878	531036	368428	286783	311219	456461	434529	911913	1.5353e+06	265062	271453	597567	623143	684080	416778	28702.6	27716.2	2.74163e+06	2.99812e+06	563668	540972	2.89861e+06
M87/1100	4.4875	0.0049325	0.011079	3309C - own; 3309C - so4	301150	571974	544248	551002	454672	904805	327812	354018	306853	297312	282557	245354	236805	286567	460416	232809	300339	273760	1.82215e+06	856748	868135	873912	438134	400316	525814	302267	245949	269376	397080	381076	825852	1.50236e+06	220248	227582	595338	603694	664062	358489	13430.2	23486.4	2.42061e+06	2.63176e+06	486810	466932	2.84324e+06
M70/1100	4.5346	0.0046452	0.010579	3309C - own; 3309C - so4	153659	245117	279398	287736	220875	435448	169581	183078	141631	158723	163114	116310	113017	152189	219970	119574	159457	124228	903230	454542	465529	465596	235332	215019	251781	157158	125114	130703	205485	177769	432307	675507	109196	110490	249264	261137	260612	178846	4552.55	2092.19	1.31949e+06	1.4219e+06	259267	238117	1.47906e+06
M69/1100	4.6039	0.0042531	0.0098756	3309C - own; 3309C - so4	1.54018e+06	2.85855e+06	2.93862e+06	2.98368e+06	2.37209e+06	4.58729e+06	1.74889e+06	1.92273e+06	1.62008e+06	1.5998e+06	1.47603e+06	1.29308e+06	1.26794e+06	1.53714e+06	2.27302e+06	1.2267e+06	1.59786e+06	1.45046e+06	9.23611e+06	4.63902e+06	4.67732e+06	4.72243e+06	2.35419e+06	2.18232e+06	2.66829e+06	1.60728e+06	1.32186e+06	1.45265e+06	2.09206e+06	2.03234e+06	4.43923e+06	7.60886e+06	1.18732e+06	1.1937e+06	2.92065e+06	3.02332e+06	3.3773e+06	1.93715e+06	85644.2	123200	1.34083e+07	1.45692e+07	2.63724e+06	2.54701e+06	1.48577e+07
M61/1100	4.6522	0.0039993	0.0094242	3309C - own; 3309C - so4	358114	533840	621849	602526	528537	842980	377284	408829	331884	344898	313100	230141	262958	351058	415651	253396	340966	289082	1.76724e+06	982851	967770	1.01009e+06	525431	476860	480864	328216	250723	300224	462201	440790	951960	1.43194e+06	249297	258219	563590	553961	617036	416140	16006.3	18569.6	2.73934e+06	2.84343e+06	562818	535683	3.08279e+06
M77/1130	4.6617	0.0039515	0.0094142	1103P - own; so4 - own	206574	49523.1	305154	130411	8960.12	163667	189474	87091.5	88344.9	62410.2	35297.3	28407.1	86357.9	26558.8	46950.8	32786.1	23462.6	49695.2	195629	118759	130354	161149	53360.7	73858.9	87498.8	46375.3	124161	80922.6	65505.6	118825	187362	135710	208116	51496.6	35441.4	31453.1	24370.7	71500.4	1497.8	537.604	111523	64216	74460.6	52471.3	89559
M136/1146	5.1219	0.0022032	0.0056995	1103P - 3309C; 1103P - own; so4 - 3309C; so4 - own	107008	83002.3	155288	138506	28949.5	154596	103731	105089	52006.8	94321.4	37548.3	43552	51431.4	56288.7	53903.3	61723.9	43655.3	47117.7	122293	73488.5	74070.2	114756	38473.3	65267.8	77737.3	52772	82905.2	78578.9	51309.3	79294.5	87496.7	74274.8	109054	77419.3	26164.2	25684.9	39118.4	48492.5	0	0	58577.9	63637	88459	87283.3	66683.1
M121/1147	4.9601	0.0027049	0.0068853	1103P - 3309C; 1103P - own; so4 - 3309C; so4 - own	203670	151860	298604	273275	9666.54	298133	183553	206235	101612	174686	78526.9	87122.9	100599	107889	106127	116805	87810.3	87660.4	239805	142897	142428	213697	75117.9	126885	149278	102219	164322	150225	98269.1	153600	150219	145576	186292	154311	42180.7	37052.2	68670	92056.2	0	0	107390	119281	173703	163449	129785
M41/1147	4.0237	0.0089118	0.018605	own - 1103P	190090	53725.9	178131	136634	91675.7	129727	167687	170003	209724	218043	454598	202414	301376	296877	43084.1	235779	246253	208074	90634.7	99380.2	164630	166539	189483	161949	34551.6	181261	164962	238261	221524	175143	170638	130225	186587	22787.8	33943.5	38338.5	33288.7	171523	8004.37	11197.3	70207.8	93612.1	200579	174197	61550.8
M94/1182	5.202	0.0019907	0.0052063	1103P - own; so4 - own	109322	41974.3	177399	95777.2	0	134906	119593	56594.1	97284.7	43448.6	38994.7	1885.44	56721.1	26959.5	45502.1	38552.3	44432.3	32313	146524	106821	107177	117948	59761.3	48382.1	59445.1	54340.5	106910	103736	83544.4	78199.1	127127	101055	137319	118436	24618.5	14802.6	51431.8	49962.6	0	0	87940.2	86693.7	78290.6	50964.7	70609.6
M77/1182	6.0922	0.00064863	0.0021897	1103P - own; so4 - own	167020	67347	265650	138854	9864.01	192467	181195	84057.7	150828	72482.7	69858.8	27745.3	9228.95	44105.4	65358	47333.1	43850.7	46251.8	155895	156073	163721	158732	96259.3	66702.6	75205.1	4804.23	153185	9379.08	136677	115011	177749	145984	200250	174265	39253.5	33229.5	77245.9	76039.5	2595.9	979.768	133161	129588	118010	85018.7	97952.6
M136/1182	6.6637	0.00031776	0.0012169	1103P - own; so4 - own	68514.6	29819.8	111938	57940	1015.18	82470.3	74402.6	34627.1	59660.1	21724.4	22360.5	471.544	136.14	2537.16	27339.1	24917.6	27954.1	13329.2	90484.1	50690.8	67755	71613.4	0	141.153	36771.8	33125.2	64828.7	63815.1	50568.5	46525.1	75089	61277.2	83876.4	74200.7	11106.7	6026.75	0	28966.5	0	0	53876.3	54642.4	46717.5	33372	41165.8
M56/1203	8.2313	4.6162e-05	0.0002954	own - 1103P; so4 - 1103P; own - 3309C; own - so4	1.40338e+07	1.1576e+07	1.2903e+07	1.2345e+07	2.06827e+07	1.21772e+07	1.54786e+07	1.38625e+07	2.35258e+07	1.5425e+07	2.72916e+07	1.60148e+07	1.85358e+07	1.98875e+07	1.07876e+07	1.76961e+07	1.59716e+07	1.38021e+07	7.88057e+06	8.79247e+06	1.15696e+07	1.08466e+07	1.72381e+07	1.29383e+07	1.03865e+07	1.67404e+07	1.32084e+07	1.80008e+07	1.54792e+07	1.31209e+07	1.0235e+07	8.77781e+06	1.33044e+07	1.77463e+07	1.3066e+07	1.30672e+07	1.05559e+07	1.30698e+07	1.88125e+06	625460	5.94562e+06	7.5471e+06	1.35455e+07	1.21079e+07	6.52788e+06
M58/1203	5.0895	0.0022954	0.0058741	own - 1103P; own - 3309C	933439	873125	985907	908566	1.62471e+06	895393	1.15151e+06	914383	1803.94	983805	2.35935e+06	1.0201e+06	1.52383e+06	1.4733e+06	814008	1.33289e+06	1.01889e+06	897498	600951	677897	868813	823732	1.28513e+06	840176	769244	1.40899e+06	859182	1.35148e+06	1.2618e+06	846163	907398	671761	1.14812e+06	1.43041e+06	1.00309e+06	966949	778973	842294	190374	61232.9	488176	580479	866462	814546	496883
M57/1203	6.4292	0.00042556	0.0015346	own - 1103P; own - 3309C	1.68284e+07	1.59559e+07	1.77504e+07	1.66114e+07	2.86417e+07	1.64829e+07	2.05627e+07	1.66377e+07	3.69024e+07	1.8177e+07	4.15614e+07	1.83989e+07	2.69133e+07	2.62362e+07	1.49673e+07	2.37621e+07	1.84498e+07	1.61577e+07	1.08728e+07	1.20858e+07	1.56786e+07	1.47465e+07	2.28796e+07	1.51756e+07	1.41577e+07	2.4781e+07	1.5526e+07	2.38136e+07	2.25733e+07	1.54026e+07	1.63438e+07	1.22161e+07	1.61443e+07	2.58865e+07	1.83422e+07	1.75981e+07	1.43497e+07	1.53177e+07	2.77338e+06	897460	8.88211e+06	1.03486e+07	1.57428e+07	1.43801e+07	8.89001e+06
M52/1206	11.083	1.5473e-06	1.9382e-05	own - 1103P; so4 - 1103P; own - 3309C; own - so4	1.69209e+06	1.19967e+06	1.21322e+06	1.1402e+06	2.03639e+06	1.15839e+06	1.36103e+06	1.43285e+06	2.76373e+06	1.86679e+06	2.32189e+06	1.82907e+06	1.83382e+06	1.83673e+06	1.13429e+06	1.81313e+06	1.71758e+06	1.46973e+06	781994	846633	1.07679e+06	1.03017e+06	1.61144e+06	1.31964e+06	1.01301e+06	1.87359e+06	1.3741e+06	1.68262e+06	1.52933e+06	1.38872e+06	1.10348e+06	875711	1.36223e+06	1.77776e+06	1.2492e+06	1.19973e+06	976990	1.37294e+06	174789	35235.4	588634	661524	1.44172e+06	1.23641e+06	617140
M40/1206	7.6823	9.0279e-05	0.00052002	own - 1103P; own - 3309C; own - so4	1.67024e+07	1.29579e+07	1.21171e+07	1.22563e+07	2.04364e+07	1.25022e+07	1.44751e+07	1.53172e+07	5.8273e+06	2.00132e+07	6.60741e+06	1.93475e+07	1.93319e+07	1.95578e+07	1.32371e+07	1.92431e+07	1.80438e+07	1.57624e+07	9.30807e+06	9.70589e+06	1.2379e+07	1.16025e+07	1.73059e+07	1.42564e+07	1.17356e+07	2.05179e+07	1.50503e+07	1.79938e+07	1.32315e+07	1.3908e+07	1.01251e+07	8.5222e+06	1.27483e+07	1.77802e+07	1.26875e+07	1.26552e+07	9.87215e+06	14193236	2.10217e+06	245665	5.81994e+06	7.392e+06	1.41866e+07	1.30042e+07	6.9553e+06
M54/1206	12.122	4.6598e-07	6.4689e-06	own - 1103P; so4 - 1103P; own - 3309C; so4 - 3309C; own - so4	224442	161914	131036	136923	260798	150977	194767	199675	250176	274627	331374	260859	263140	254324	153218	249367	255572	208983	94928.6	107584	136733	121113	232412	191385	59229.1	256501	175669	246906	213217	151065	108113	84611.4	162375	248650	150354	142342	102285	144456	18042.6	1834.25	57446.8	1072.6	30.079	12866.8	65678.8
M43/1206	10.613	2.6802e-06	3.1116e-05	own - 1103P; so4 - 1103P; own - 3309C; own - so4	909430	634292	632625	596820	1.06597e+06	608628	718020	752920	1.47463e+06	974829	1.08274e+06	954892	965156	949268	599160	933369	895905	763240	403877	438849	577244	549460	832047	682878	528307	969473	719158	873355	789756	712727	597296	435832	721956	877069	644202	639755	516383	722578	99134.7	21151.5	315334	351021	733525	630490	325450
M55/1206	7.5686	0.0001038	0.0005745	own - 1103P; so4 - 1103P; own - 3309C	4.18882e+07	3.00196e+07	2.9503e+07	2.95504e+07	5.0977e+07	2.96866e+07	3.4111e+07	3.57892e+07	5.64446e+07	4.65341e+07	1.87571e+07	4.50289e+07	4.49225e+07	4.44775e+07	3.01293e+07	4.37381e+07	4.20183e+07	3.64198e+07	2.11568e+07	2.23466e+07	2.8541e+07	2.71866e+07	3.93451e+07	3.2744e+07	2.64726e+07	4.6418e+07	3.45726e+07	4.07677e+07	3.4517e+07	3.39958e+07	2.57372e+07	2.20198e+07	3.30306e+07	4.14683e+07	3.04936e+07	3.03922e+07	2.4238e+07	3.35698e+07	4.28377e+06	638860	1.41864e+07	1.73602e+07	3.45607e+07	3.05927e+07	1.65943e+07
M69/1206	6.9844	0.0002134	0.00092343	own - 1103P; own - 3309C; own - so4	1.6428e+06	1.00292e+06	664909	1.01129e+06	31822	1.02317e+06	1.01895e+06	1.29513e+06	16026.2	1.99467e+06	3.25072e+06	1.78877e+06	1.46629e+06	1.91281e+06	1.09735e+06	1.73967e+06	1.77284e+06	1.38777e+06	645339	632578	962012	870102	1.60863e+06	1.16561e+06	1.005e+06	1.83694e+06	1.36212e+06	1.75251e+06	853034	988339	15848.7	27739.9	80853	17765.9	829204	918010	441334	6534.24	229956	73926.8	191191	10268.8	1.02574e+06	82413.1	400101
M53/1206	8.0464	5.7829e-05	0.00034408	own - 1103P; so4 - 1103P; own - 3309C; own - so4	3.01008e+06	2.16236e+06	2.14355e+06	2.03037e+06	3.67437e+06	2.04276e+06	2.39988e+06	2.46273e+06	5.04764e+06	3.27256e+06	4.67921e+06	3.14264e+06	3.16779e+06	3.26304e+06	2.03967e+06	3.42751e+06	2.90255e+06	2.51525e+06	1.37981e+06	1.51454e+06	1.93138e+06	1.85678e+06	2.84538e+06	2.26474e+06	1.7943e+06	3.48504e+06	2.38202e+06	3.04206e+06	2.74829e+06	2.40907e+06	1.98842e+06	1.56384e+06	2.42541e+06	3.13824e+06	2.2058e+06	2.14048e+06	1.74841e+06	2.36523e+06	347436	96728.4	1.1135e+06	1.24331e+06	2.59086e+06	2.14468e+06	1.11513e+06
M47/1207	7.6657	9.2132e-05	0.00052002	own - 1103P; so4 - 1103P; own - 3309C; so4 - 3309C	415317	271947	255537	268857	444312	225835	301902	295161	571399	405504	506816	385661	384033	372029	258470	376079	351954	324809	194412	184568	239570	234109	337643	289687	247111	381753	301925	348575	306167	270328	2042.27	178687	283474	342935	245184	252499	193468	278971	54694.3	10209	130488	132700	290096	264443	146791
M44/1208	5.7227	0.0010316	0.0031079	own - 1103P; own - 3309C; own - so4	1.64601e+06	1.22169e+06	1.21484e+06	1.1389e+06	2.03801e+06	1.14638e+06	1.34602e+06	1.36569e+06	2105.36	1.77958e+06	2.27356e+06	1.69596e+06	1.75356e+06	1.72977e+06	1.15996e+06	1.77804e+06	1.59629e+06	1.39632e+06	832397	914050	1.13657e+06	1.08259e+06	1.54623e+06	1.28795e+06	1.02272e+06	1.87955e+06	1.33573e+06	1.62108e+06	1.47193e+06	1.33849e+06	1.14929e+06	909586	1.33871e+06	1.63941e+06	1.22385e+06	1.20316e+06	1.00747e+06	1.3225e+06	293677	86578.2	656477	756307	1.41053e+06	1.20071e+06	663771
M71/1209	7.6757	9.1016e-05	0.00052002	own - 1103P; so4 - 1103P; own - 3309C	1.92704e+07	1.4219e+07	1.28581e+07	646561	2.39992e+07	691993	1.6445e+07	497795	2.65691e+07	2.26322e+07	2.69039e+07	2.20283e+07	2.18423e+07	2.18577e+07	1.51108e+07	2.12685e+07	2.05361e+07	1.80068e+07	1.08957e+07	1.11841e+07	750986	1.0244e+06	1.94948e+07	1.63734e+07	1.37678e+07	2.25946e+07	1.72465e+07	2.00393e+07	1.25765e+07	1.63213e+07	4.70483e+06	8.66049e+06	1.24686e+07	2.02549e+07	1.2962e+07	1.50219e+07	1.14088e+07	1.65504e+07	3.1512e+06	1.19962e+06	4.93053e+06	6.82819e+06	1.6923e+07	1.51783e+07	7.72676e+06
M42/1209	11.33	1.1617e-06	1.4945e-05	own - 1103P; so4 - 1103P; own - 3309C; own - so4	3.14025e+06	2.16763e+06	2.20851e+06	2.06088e+06	3.83173e+06	2.06728e+06	2.50338e+06	2.58666e+06	1.82695e+06	3.41386e+06	6.87595e+06	3.3005e+06	3.39726e+06	3.87064e+06	2.02089e+06	4.7035e+06	3.10712e+06	2.64799e+06	1.38852e+06	1.52414e+06	1.97586e+06	1.86297e+06	3.30095e+06	2.37488e+06	1.79571e+06	2.46945e+06	2.48804e+06	3.6947e+06	3.26306e+06	2.52551e+06	2.0865e+06	1.57712e+06	2.55714e+06	3.7164e+06	2.28771e+06	2.20458e+06	1.79526e+06	2.48407e+06	368613	120390	1.09484e+06	1.23459e+06	3.41227e+06	2.23889e+06	1.10276e+06
M70/1209	6.411	0.00043534	0.0015581	own - 1103P; own - 3309C; own - so4	4.16531e+07	2.95287e+07	3.01857e+07	2.82312e+07	4.99273e+07	2.83546e+07	3.38403e+07	3.48647e+07	1.84542e+06	4.51028e+07	5.05246e+07	4.36286e+07	4.44102e+07	4.37496e+07	848450	4.29079e+07	4.12044e+07	3.5484e+07	1.93172e+07	2.09388e+07	2.69905e+07	2.55679e+07	3.83555e+07	3.20763e+07	2.47776e+07	4.47036e+07	3.35548e+07	4.0218e+07	3.80426e+07	3.39913e+07	2.82846e+07	2.18017e+07	3.43675e+07	4.24562e+07	3.10306e+07	2.99499e+07	2.47731e+07	3.33902e+07	5.17931e+06	1.75953e+06	1.5461e+07	1.74598e+07	3.45979e+07	3.01854e+07	1.54516e+07
M72/1210	9.4823	1.0219e-05	0.00010349	own - 1103P; so4 - 1103P; own - 3309C; so4 - 3309C; own - so4	168233	118778	116636	111739	208973	112568	133928	135882	102447	266464	248777	177210	176363	209721	111519	262484	161138	139374	73506	82278.6	103977	96558.2	176843	126463	96990.5	143838	133944	204190	176075	131427	111314	86252.3	132563	212535	121134	119053	98597.8	130452	19560.2	6539.75	60684.1	95385.6	184697	120453	59920.6
M73/1221	12.744	2.2937e-07	3.704e-06	own - 1103P; own - 3309C; own - so4	1.11299e+06	913764	569726	541194	78191.8	577380	745529	778051	1.74047e+06	1.41098e+06	1.06467e+06	2.09527e+06	1.02895e+06	3835.14	1.93133e+06	1.48224e+06	1.16316e+06	1.07372e+06	483854	510895	438083	440445	1895.94	606246	795337	257865	1.20121e+06	543038	4525.68	777294	557124	493565	1.47857e+06	818377	1.43685e+06	1.43187e+06	741690	819264	3819.92	2817.76	428807	447440	907941	923778	410660
M99/1222	14.683	2.6256e-08	1.3186e-06	own - 1103P; own - 3309C; own - so4	161579	135595	82723.5	76556.9	40641.9	82489.7	105485	111090	255670	205628	173390	310440	145638	98396.7	292084	235787	170658	155944	68154.5	71399.5	61437.7	62327.9	65966.5	87251.8	120175	138711	175691	123729	71328.7	109647	81261.4	68250.2	212112	135044	212136	209802	105065	116193	48.4175	38.3643	58674.8	61298.7	128287	133105	56852
M102/1222	10.562	2.8465e-06	3.2261e-05	own - 1103P; own - 3309C; own - so4	1.24869e+06	1.03785e+06	641964	580191	707801	582317	817994	777264	1.96453e+06	1.57238e+06	1.33204e+06	2.1025e+06	1.12357e+06	3019.26	1.96003e+06	888838	1.28702e+06	1.19494e+06	522505	640372	477375	449850	481.723	655316	800554	903.424	1.33019e+06	3027.44	545026	861613	629378	531453	1.66057e+06	1386.08	1.60274e+06	1.59671e+06	829040	867657	2928.1	969.518	454996	444825	998403	1.03022e+06	448008
M89/1222	15.414	1.1799e-08	1.1233e-06	own - 1103P; own - 3309C; own - so4	148192	118846	72188.8	58063.1	81447.9	77836	105270	106348	242661	194927	191263	300576	143447	104249	282097	233796	165550	151241	60799.5	65721	55656.2	60857.4	64420.8	79285.2	112335	163.689	195133	122979	67612.9	104308	56656	57173.3	195664	133591	184646	198632	95542.8	108143	388.343	82.458	52371.4	57773.9	120197	123593	53412.8
M100/1222	7.4377	0.00012193	0.00063085	own - 1103P; own - 3309C; own - so4	2.07895e+06	1.49621e+06	960162	897055	968829	871544	1.2218e+06	1.277e+06	2.95893e+06	2.35871e+06	131858	2.41378e+06	1.69338e+06	66423.7	2.90638e+06	1.60419e+06	1.70314e+06	1.733e+06	754344	861387	687870	718419	43734.2	1.1178e+06	1.31453e+06	69332.2	1.77466e+06	48637.4	66018.4	1.23809e+06	2.57734e+06	815791	2.33139e+06	66150.4	2.2824e+06	2.26139e+06	1.20022e+06	1.24525e+06	22509.3	14105.5	754451	1.68422e+06	1.80174e+06	1.46863e+06	685642
M60/1222	12.728	2.3344e-07	3.704e-06	own - 1103P; own - 3309C; own - so4	1.33886e+06	1.12354e+06	696761	659698	781418	699130	896342	940253	2.11094e+06	1.69212e+06	1.36143e+06	2.50182e+06	1.24833e+06	839928	2.33012e+06	1.88443e+06	1.41505e+06	1.29989e+06	586327	618177	519846	538446	607028	730924	1.00117e+06	1.15951e+06	1.44595e+06	988989	718701	931634	685799	588297	1.76249e+06	1.07649e+06	1.7266e+06	1.71405e+06	897375	987454	4488.49	1950.73	512680	528605	1.1338e+06	1.10912e+06	494050
M61/1222	12.196	4.2796e-07	6.173e-06	own - 1103P; own - 3309C; own - so4	812313	686330	423671	402548	485686	428818	545857	572489	1.27417e+06	1.0283e+06	5118.7	1.52367e+06	735621	381421	1.41999e+06	1.06985e+06	860177	790265	357518	377445	321432	329817	302981	448924	609864	95857.9	874309	440488	315473	566969	419496	362019	1.07884e+06	543968	1.05812e+06	1.04343e+06	549236	602560	2733.46	4382.86	319989	329181	663362	674788	306992
M87/1222	12.104	4.7565e-07	6.4689e-06	own - 1103P; own - 3309C; own - so4	312597	239464	161275	151643	175076	156799	209160	239387	496100	375815	624690	151592	285977	320324	545941	396811	327603	320755	51707.6	139099	121119	114335	1314.46	160938	200634	281574	308019	292216	3689.04	214578	161855	129565	419139	2300.41	390934	404229	191870	231188	1237.48	719.625	117472	115182	248519	225204	112618
M101/1222	9.9017	6.2032e-06	6.5616e-05	own - 1103P; own - 3309C; own - so4	4.41019e+06	3.67342e+06	2.27034e+06	2.1306e+06	2.53066e+06	2.27665e+06	2.93256e+06	3.04641e+06	6.92302e+06	5.57838e+06	4.32538e+06	5.88309e+06	3.98255e+06	2.05744e+06	6.10838e+06	1.91393e+06	4.61694e+06	4.26064e+06	1.86134e+06	1.97505e+06	1.6992e+06	1.72434e+06	1.51526e+06	2.39011e+06	3.22209e+06	3.67476e+06	4.7338e+06	11267.9	1.74978e+06	3.04793e+06	2.23533e+06	1.91268e+06	5.84544e+06	2.16892e+06	5.72496e+06	5.68336e+06	2.93086e+06	3.23045e+06	10097.4	7878.39	1.65938e+06	1.69469e+06	3.50614e+06	3.60824e+06	1.5843e+06
M88/1222	14.751	2.4366e-08	1.3186e-06	own - 1103P; own - 3309C; own - so4	255198	213575	129173	123175	143400	130885	170173	177948	401461	324500	301980	488391	232882	160684	458833	368425	267602	251111	109274	112246	97525.5	101018	106159	138249	190242	222147	276264	188687	105265	175201	127149	106780	340171	200460	334743	333141	167194	185564	729.621	147.698	95563.9	98576.5	203263	209282	90807.9
M43/1222	17.098	1.9335e-09	4.6018e-07	own - 1103P; own - 3309C; own - so4	2.17939e+06	1.81166e+06	1.12203e+06	1.1374e+06	332696	1.18509e+06	1.56371e+06	1.67042e+06	3.85507e+06	3.10712e+06	2.92128e+06	4.68061e+06	2.22236e+06	1.5724e+06	4.36923e+06	3.58182e+06	2.57973e+06	2.32575e+06	1.02728e+06	1.08701e+06	919570	936055	1.0244e+06	1.27567e+06	1.78455e+06	2.11123e+06	2.64896e+06	1.85502e+06	1.00898e+06	1.34462e+06	731125	997978	2.61032e+06	1.96688e+06	2.86226e+06	2.98613e+06	1.52637e+06	1.72985e+06	4456.36	594.028	744600	902072	1.91966e+06	1.98777e+06	782117
M120/1258	6.012	0.00071729	0.002371	1103P - own; 3309C - own; so4 - own	40009.7	43797.7	59668.8	77744	144544	83716.1	51233.1	72842.9	24515.2	34090	3626.99	22314.7	31180.1	57710.5	18946.7	22000.1	23654.8	24599.4	70787	48214.9	57743.2	74157.7	36004.2	39221.9	25189.2	33670.5	67413	90382.1	26976.3	29474.9	36616	35815.5	23860.2	25462	9082.36	12915.2	20433.3	28954.5	87.2127	41.7228	76617.4	88708.5	58951.3	65007.5	75116.5
M134/1258	5.8787	0.00084789	0.0027644	1103P - own; so4 - 3309C; so4 - own	90233.1	124443	157564	219846	0	226267	144902	205316	69763.1	101373	7437.27	65199.7	85080.6	161486	45737.9	60729.9	59596.4	66956.5	195015	135189	166292	211126	94793.9	108771	70380.9	92921.4	176651	254520	7339.52	86987.5	97178.6	96578.8	47319.4	78924.7	30327.9	28181.3	64068.7	66696	622.656	296.023	206606	239446	163754	186741	212541
M61/1265	4.9502	0.0027388	0.0068978	1103P - own; 3309C - own; 3309C - so4	35795.6	28897.3	87288.5	83931.9	57399	51318.6	38719.4	43073.3	29672.5	29501.9	26267.4	21461.6	13420.6	2718.71	91484.8	22850.6	31169.9	30359.6	226257	246085	138799	130189	55233	49011.1	25512.1	36640.3	18940.4	24428.9	55701.4	54814.5	160236	140814	24801.3	23815.3	47775.3	49664.3	35221.3	36118.8	2057.31	1140.58	461869	536781	80650.8	77392.7	472112
M43/1265	5.4717	0.0014157	0.0038728	1103P - own; 3309C - own; 3309C - so4	151481	152636	314840	302695	46851.1	207981	159354	167914	185167	135527	171908	95981.1	110096	110839	118505	111996	159987	135364	781427	849665	482980	485075	211940	198604	145181	171478	98044.7	117450	219707	209057	555286	496626	102111	107933	182142	191444	161608	142488	16563.6	14146.9	1.56014e+06	1.81193e+06	294173	285487	1.58338e+06
M45/1288	3.8132	0.011661	0.02403	1103P - own; 1103P - so4	237824	107887	329027	329242	80817.2	73900.1	100761	113827	54042.5	275971	476951	279721	211769	177182	87779.8	378478	312731	242242	1.71976e+06	2.75299e+06	607166	585398	381451	265863	86348.2	42049	104367	36480.5	155548	119285	1.11161e+06	605640	82323.5	136672	66970.9	68374.8	111206	93264.8	2.45791e+06	715991	12719806	8.03826e+06	259652	181858	6.18958e+06
M43/1289	3.6092	0.015136	0.0304	1103P - own; 1103P - so4	140697	77169.5	199625	199584	129765	49790.1	66302.6	71059.2	296811	172673	230336	175562	94500.8	120594	25810.1	237335	193761	145345	1.00536e+06	1.61327e+06	368084	354198	246823	167591	63370.6	77852.9	62581	107961	121646	75498.2	661329	366792	37374.5	96454.3	48237.3	40920.9	37145.8	58164.3	1.46708e+06	430567	7.40336e+06	4.68937e+06	176702	113850	3.60103e+06
M41/1329	5.8561	0.00087238	0.0028092	1103P - own; 3309C - own; so4 - own	111503	39908.5	156983	138112	149636	141658	86995.1	90722.5	90875.8	120839	128776	48316.8	106828	95955.5	17077.3	27806.7	86705.2	82323	176259	250252	119221	185541	112290	129135	35037.7	51721.6	77021.4	63892.2	171385	159953	223968	172832	91408.9	99098.4	77389.5	69321.9	73403.4	141374	2346.33	1229.76	230677	245931	180852	173415	204628
M61/1330	6.7646	0.00028028	0.0010936	1103P - own; 3309C - own; so4 - own	198191	131664	287939	268631	321618	250456	164216	143838	203198	172546	214831	96026.6	171759	162123	39962	77234.2	140610	117129	329222	484965	266920	315005	166252	178289	70596.2	83483.3	83900.6	96792.3	315820	301283	420301	338048	136617	125024	167004	157359	205648	259803	11538.9	7953.48	478950	535667	352683	344332	423519
M88/1330	6.334	0.00047932	0.0016901	1103P - own; 3309C - own; so4 - own	113036	88224.5	210979	192701	193515	197941	106089	102390	113050	101508	63485.9	54804.1	103158	108506	16772.4	52085.8	89486.7	77936.8	275261	346136	242760	239716	171954	163874	71767	78704	84738.7	77609	205338	197692	288771	247249	85596.3	77242.6	109779	106527	154468	172003	1167.55	701.102	325708	357005	234514	236798	304073
M43/1330	6.9392	0.00022568	0.00092996	1103P - own; 3309C - own; so4 - own	78434.6	59244.1	142540	132468	135380	134431	69140.3	67825.1	74982.9	69818.9	44691.3	6120.05	71624.6	74646.8	5629.64	34014.8	54140.7	51103.6	183814	236037	170048	165049	116993	86768.1	45624.5	52755.9	58496.6	53199.1	140316	137492	200427	169153	57009.7	51682.2	71950.7	68460.3	104940	118651	391.091	152.435	221299	246324	153839	160154	210273
M60/1330	6.7755	0.00027652	0.0010899	1103P - own; 3309C - own; so4 - own	432871	338615	812264	728232	751715	738821	393155	398212	441109	391480	230816	189753	396626	407789	199676	114947	337832	287130	1.01491e+06	1.3083e+06	856112	922804	647396	514418	178515	300329	297642	288449	800354	765317	1.11726e+06	950329	317292	308675	404351	396710	576916	648144	3950.83	2049.57	1.26038e+06	1.37546e+06	908610	887372	1.1708e+06
M101/1330	7.0667	0.00019272	0.00087365	1103P - own; 3309C - own; so4 - own	117063	96008.3	233344	196996	223697	218398	100711	93744.3	132735	74554	59214.5	51361.6	116430	87965.5	11550.3	31510.6	87051	60723.9	290878	394331	254484	236338	141324	180758	4462.35	82588.9	44496.9	89290.4	231436	219346	325251	279929	91386.6	90480.2	117830	117120	169303	193292	1371.27	600.323	373366	400856	249552	263356	349235
M70/1330	6.0121	0.0007172	0.002371	1103P - own; 3309C - own; so4 - own	130704	103316	238764	269599	276305	281467	147085	135036	144747	141992	80565.4	49825.7	147527	157552	10443.2	42306.9	111375	100327	391910	505435	351742	350567	243916	222520	63383.4	112939	120022	107291	215094	276973	342910	353224	28989.6	104783	122234	126259	218500	222858	674.61	194.335	446050	518305	338060	315415	442474
M113/1330	6.5829	0.00035135	0.0013273	1103P - own; 3309C - own; so4 - own	95122.4	72397.4	174471	152146	162485	147604	75703	82036.2	14351.5	66631.1	51569.8	33468.8	71993.8	65149.4	40509.8	22006.7	68255.8	56414.5	201555	283718	153604	186009	141704	123239	53555.1	51872.8	31030.3	32010.5	172801	167574	244680	205426	66722.1	62637.3	88924.8	87040.5	114663	143955	1362	297.205	258519	298621	187254	182078	246401
M85/1330	5.2816	0.0018	0.0048135	1103P - own; 3309C - own; so4 - own	40351.8	42890.8	76203.2	77563.1	80851.3	79490.3	43687.9	45585.2	41940.2	43688.1	29170.2	21139.1	40742.1	46400.2	6381.19	14914	41619.5	35789.1	110097	141975	99833	104286	73753.4	69740.3	29047.6	27102	37200.1	22559.3	77542.3	89632.9	120847	105506	40171.8	35655.1	39388	46621.2	68261.2	77705.3	138.013	42.1977	136911	144070	103094	110679	135146
M69/1352	3.8428	0.011229	0.02334	own - 1103P; so4 - 1103P	1.38081e+06	1.02322e+06	965622	1.04155e+06	1.40133e+06	820792	1.10048e+06	1.12655e+06	1.82578e+06	1.36189e+06	1.90062e+06	1.35703e+06	1.05982e+06	1.11305e+06	991976	1.3034e+06	1.45566e+06	1.19541e+06	1.06641e+06	1.00118e+06	849409	855091	1.13717e+06	981016	872947	1.37839e+06	813902	1.07606e+06	916449	1.25609e+06	1.08189e+06	883261	950648	1.21533e+06	1.00692e+06	1.05553e+06	588123	927994	79085.5	19123.3	200007	595467	1.31328e+06	1.21305e+06	751455
M74/1389	13.782	7.1268e-08	1.4749e-06	own - 1103P; own - 3309C; own - so4	36627.3	19478.7	21260.6	16669.3	23416	25245.7	31628.1	31447	71372.5	9677.53	107185	93135.2	7275.03	47443.2	25721.3	89005.1	17058.9	37102.6	13417.3	1246.53	10106.6	8061.53	268.712	735.961	19680.6	32421.7	85436	484.128	33252.7	30096.8	10552.7	12033.1	90881.2	90629.1	76035.9	77210.4	31690.4	34437.8	0	0	10552.5	17508.1	70975.9	63989.1	10857.8
M85/1434	9.3882	1.1434e-05	0.00010885	own - 1103P; own - 3309C; own - so4	1.94784e+06	1.70111e+06	1.12075e+06	1.06167e+06	1.47455e+06	1.84265e+06	1.49402e+06	1.33004e+06	3.08582e+06	2.28087e+06	3.51983e+06	3.03684e+06	2.69023e+06	94672.4	2.14978e+06	91584.2	1.92796e+06	1.66523e+06	868329	1.27352e+06	752208	722600	84751.2	781187	1.69587e+06	1.75465e+06	1.66164e+06	2.25104e+06	1.40555e+06	1.36628e+06	691113	744315	3.80161e+06	3.65729e+06	3.61344e+06	3.10654e+06	2.0348e+06	1.80101e+06	1615.06	582.64	253568	310494	2.8191e+06	2.52288e+06	191422
M70/1434	12.651	2.5485e-07	3.9132e-06	own - 1103P; own - 3309C; own - so4	21380.6	85525.6	57988.8	67984.9	83728.7	102297	84562.8	79647.2	168619	149003	238391	203226	142710	129792	221516	199914	121326	95145	62700.4	86356.6	56028.1	51921.3	51094.5	40648.6	90711.5	99994.1	250149	185275	75961.5	76329.3	37227.2	18422.7	208050	199591	192434	178978	103656	95438.7	36.3054	0	24933.7	18196.9	157309	155063	33741.5
M56/1435	5.3879	0.0015736	0.0042559	own - 1103P; own - 3309C; own - so4	1.77807e+06	1.53148e+06	948489	966389	1.38057e+06	1.43813e+06	1.37401e+06	1.17433e+06	2.45288e+06	918373	409478	2.20363e+06	1.8456e+06	903067	2.75878e+06	1.37848e+06	602681	1.17456e+06	703145	1.02469e+06	680074	529262	665208	535242	564789	1.29047e+06	3.00978e+06	1.17148e+06	1.29926e+06	1.23725e+06	649167	682397	3.42223e+06	2.67137e+06	3.02216e+06	2.25893e+06	1.70365e+06	1.63494e+06	2213.25	1375.3	159909	95400.2	1.73839e+06	1.53579e+06	506864
M71/1435	13.521	9.5487e-08	1.6834e-06	own - 1103P; own - 3309C; own - so4	367660	321469	196280	207753	287675	344215	261886	280999	584846	500231	831430	701833	507330	456738	769221	708126	420002	344944	178695	249587	167722	148328	153114	144688	331228	344879	867826	647281	203964	261403	101426	113364	710945	698119	652309	611105	371514	340265	352.616	139.699	160599	117336	554132	517935	183237
M55/1435	13.088	1.5533e-07	2.6406e-06	own - 1103P; own - 3309C; own - so4	169003	152409	100636	102141	136783	165938	132520	130994	271241	239585	385176	330560	241260	215227	360791	329253	197917	159117	92346.9	134823	93240.7	70576.3	77011.6	73329.5	151820	163752	407551	300840	124382	121083	61646.2	81841.6	337429	320352	320080	290228	179648	158215	242.793	0	26763.6	30884.3	257540	246885	28679
M98/1435	5.7605	0.00098374	0.0030407	own - 1103P; own - 3309C; own - so4	3.57142e+06	3.08426e+06	2.00965e+06	1.91245e+06	2.73319e+06	3.37899e+06	2.72775e+06	2.62007e+06	5.68084e+06	4.53801e+06	5.10844e+06	2.7846e+06	4.92105e+06	2.6417e+06	2.79823e+06	2.52461e+06	3.36045e+06	3.23017e+06	1.58413e+06	2.26729e+06	1.33497e+06	1.32532e+06	1.33896e+06	1.35091e+06	2.81138e+06	3.23349e+06	2.39393e+06	3.03183e+06	2.54462e+06	2.46762e+06	1.21621e+06	1.31224e+06	7.0561e+06	5.48095e+06	6.71705e+06	6.07516e+06	3.71221e+06	3.27592e+06	3678.54	1657.53	468341	521317	4.13891e+06	5.01878e+06	439236
M83/1435	13.947	5.9329e-08	1.4749e-06	own - 1103P; own - 3309C; own - so4	313270	276089	175190	163512	240180	295783	238474	231542	501201	434767	709801	605029	439069	385332	660393	605627	352542	285150	141869	196881	128783	122086	128834	125594	268522	279161	759499	553003	218385	214106	104860	112779	618737	595145	583966	533435	319552	288171	331.446	40.3516	43116.4	52970.2	466475	445887	44595.7
M69/1435	14.233	4.316e-08	1.4749e-06	own - 1103P; own - 3309C; own - so4	2.80972e+06	2.42266e+06	1.57489e+06	1.50186e+06	2.14821e+06	2.6519e+06	2.15511e+06	2.07746e+06	4.52138e+06	3.94439e+06	6.53954e+06	5.50808e+06	3.94717e+06	3.46926e+06	6.04823e+06	5.5177e+06	3.17899e+06	2.56013e+06	1.26219e+06	1.80905e+06	1.17194e+06	1.05678e+06	1.1409e+06	1.11282e+06	2.43068e+06	2.56544e+06	6.88845e+06	4.97035e+06	1.9795e+06	1.94118e+06	947402	1.03872e+06	5.6654e+06	5.45919e+06	5.38061e+06	4.86614e+06	2.92551e+06	2.58792e+06	1131.87	573.697	423158	469000	4.19865e+06	4.00455e+06	422210
M127/1435	13.663	8.1409e-08	1.55e-06	own - 1103P; own - 3309C; own - so4	252058	215868	139236	133591	192041	239732	193900	189778	397725	352294	578087	488279	349836	303693	532854	488472	280728	225922	114807	157822	101776	97560.3	99397.5	99156.4	217675	226188	615186	445374	176923	172214	82873.8	89353.8	503090	478814	476386	433479	260475	230707	0	0	41927	46577.2	382830	363174	42678.3
M143/1435	14.004	5.5665e-08	1.4749e-06	own - 1103P; own - 3309C; own - so4	101111	88353.7	54950.5	54577.1	74462.7	96162.9	76830.1	73691.5	166858	146516	244030	200661	144050	125973	223963	201250	116475	94433.5	45845.9	65111.2	43815.5	39557.3	41235.5	38340.8	86904.9	90135.2	258501	186645	72587.6	70734.8	30560.9	34831.7	209344	202641	199123	176877	107102	93866	0	0	17236.1	18304.3	157028	148000	18644
M130/1435	14.221	4.3749e-08	1.4749e-06	own - 1103P; own - 3309C; own - so4	424541	368669	235440	223711	328280	404809	327358	305180	693852	609545	1.01666e+06	850507	608727	532787	933949	856919	488867	391549	192000	277391	176540	157283	173694	169052	368781	391282	1.06827e+06	769886	298863	290415	137332	153840	876908	844334	827982	753638	450088	394640	158.79	0	56931.6	69846	648098	618555	66061.6
M145/1435	13.945	5.9473e-08	1.4749e-06	own - 1103P; own - 3309C; own - so4	55209.9	47316.6	30744.6	28558.9	40251.9	50207.6	39668.5	41191.2	89618.6	79640.8	132918	111517	78603.3	69610	93196.8	105482	58313	51454	20997	26346.7	22659.4	18727.1	17358.9	20735.3	44542.6	50341.9	139557	99401.5	39346.1	35796.1	16173.6	19090.9	114278	105470	106859	97268.5	56333.2	50049.1	0	0	8344.83	8425.55	83879.9	78991	7710.16
M102/1435	13.982	5.705e-08	1.4749e-06	own - 1103P; own - 3309C; own - so4	170883	145011	93035.7	89759	127915	159113	130008	124388	276586	240302	401845	337367	236734	208612	369052	338295	192522	151945	74843	107082	69746.6	60170.2	68599.3	65552.1	144405	155104	424018	302871	119999	114190	55069.1	60906.4	346702	335519	326797	294205	176306	157075	0	0	26054.4	29391.8	255945	243880	23365.8
M144/1435	13.62	8.5444e-08	1.5643e-06	own - 1103P; own - 3309C; own - so4	1.51834e+06	1.33755e+06	878071	839453	1.19464e+06	1.4436e+06	1.18326e+06	1.14607e+06	2.37548e+06	2.07184e+06	3.25627e+06	2.79694e+06	2.07474e+06	1.83685e+06	3.02152e+06	2.79004e+06	1.70121e+06	1.38561e+06	706117	998347	657896	595495	644378	626837	1.32707e+06	1.39534e+06	3.40417e+06	2.54284e+06	1.10556e+06	1.07171e+06	543073	581954	2.87756e+06	2.76412e+06	2.75963e+06	2.51336e+06	1.58989e+06	1.402e+06	1327.67	790.799	0	0	2.18629e+06	2.08057e+06	0
M90/1435	14.882	2.1099e-08	1.3186e-06	own - 1103P; own - 3309C; own - so4	534320	496973	247512	264176	430238	541193	431159	446882	899168	813957	1.29792e+06	1.11856e+06	817471	719209	1.22739e+06	1.13031e+06	658015	519602	191865	377236	248965	222316	240044	230605	487849	532230	1.39535e+06	1.02879e+06	175850	367364	160190	185183	1.12381e+06	1.06496e+06	1.01476e+06	960251	548038	531209	288.357	264.703	80297.7	92842.3	878057	828829	89117.4
M89/1435	16.222	4.9256e-09	7.8153e-07	own - 1103P; own - 3309C; own - so4	423213	404235	203076	258685	297788	437025	364084	379009	781265	673096	1.06844e+06	969816	642501	606973	1.04978e+06	944138	571411	456289	232550	319799	189330	183199	74629.8	158216	420275	449968	1.20441e+06	887441	145525	50132	56885.8	142039	906788	971662	912649	755129	464262	445372	249.738	34.9765	88916.4	71260.5	747560	649728	72694.6
M128/1435	8.1816	4.9041e-05	0.00030715	own - 1103P; so4 - 1103P; own - 3309C; own - so4	399054	322024	225994	210414	307412	358568	305648	279640	558100	289707	539695	225978	496133	321271	585241	336067	223526	359177	106254	230742	150421	143939	143266	124011	322789	331745	704200	391547	285308	274929	136273	144734	733045	658687	693617	429551	399048	356697	776.028	326.746	43290.3	41124.6	512991	409931	53122.5
M61/1435	13.849	6.6131e-08	1.4749e-06	own - 1103P; own - 3309C; own - so4	717274	622918	402612	384807	553181	675669	20850.4	533267	1.13277e+06	981952	1.60403e+06	1.36777e+06	991665	875995	1.49122e+06	1.36367e+06	804258	649880	328717	461271	303471	276003	295492	283869	621101	651459	1.6924e+06	1.2444e+06	505583	495865	243260	257434	1.3933e+06	1.34831e+06	1.33645e+06	1.21528e+06	746036	652626	526.656	210.624	101730	114771	1.05567e+06	1.004e+06	100555
M87/1435	13.925	6.0771e-08	1.4749e-06	own - 1103P; own - 3309C; own - so4	55659	49360.4	28494.5	32358.1	46606	54527	42542.7	46253.2	93554.4	85577.3	137427	114607	79581.8	74488.6	125245	116091	68361.9	55760.4	26723.4	35802.7	25340.6	22825.7	22952.4	22313.5	50325.7	55208.4	144875	106989	31427.1	41873	13502.2	19369.1	113700	115386	110867	90363.6	55731.9	54918.6	0	0	8223.87	9378.5	89713.4	85511.1	7603.43
M101/1435	17.452	1.33e-09	4.6018e-07	own - 1103P; so4 - 1103P; own - 3309C; own - so4	18013	168744	16304.5	13614.4	19649.1	227268	178410	184424	382213	357624	569676	496571	292559	304775	535203	473132	274366	9279.12	113444	158204	17396.4	17607.9	77701.8	98543.8	199956	201767	628135	438930	22167.6	131551	59510.3	14271.7	480092	464077	442834	423059	214862	225616	0	0	21746.7	27344.5	386544	335683	22653.9
M129/1436	13.787	7.0859e-08	1.4749e-06	own - 1103P; own - 3309C; own - so4	160625	147216	85849.9	88184.4	128574	161187	127377	123741	273700	239186	396701	331823	231991	207370	367937	332965	194011	156204	72193.8	106545	70601.1	61122.9	65243.8	59873.8	143486	153461	423703	297025	91022.8	110415	44601.9	59747.3	332522	332302	298725	286338	170034	146238	0	0	22843.3	26337.6	256882	242404	23688.9
M82/1436	9.9108	6.1363e-06	6.5616e-05	own - 1103P; own - 3309C; own - so4	85586	87569.1	56381.1	4176.1	88949.5	128304	82672.8	85374.3	136911	113234	183382	154999	110289	115810	174828	156882	95568.9	74825.1	50656.6	57108.7	46426.8	35943.3	36959.1	43198.8	76737.4	72147.3	220450	184151	58169.4	71568.1	22617.1	29970.9	158587	152250	151033	139515	90395.9	81738.4	0	0	35480.5	39385.2	136054	154373	33797.8
M172/1436	15.62	9.4336e-09	1.1226e-06	own - 1103P; own - 3309C; own - so4	778309	498454	346798	334285	671344	881764	463538	702380	1.56788e+06	1.37899e+06	2.22293e+06	1.9149e+06	1.31445e+06	1.18816e+06	2.09987e+06	1.89433e+06	1.06573e+06	852899	430353	595440	392258	360009	365108	378559	824648	836101	2.37529e+06	1.72926e+06	260579	456525	73209.4	273499	1.74045e+06	1.89021e+06	1.69553e+06	1.52508e+06	949886	865777	536.769	46.9964	141403	167456	1.4512e+06	1.37029e+06	149607
M157/1436	14.548	3.0472e-08	1.3186e-06	own - 1103P; own - 3309C; own - so4	43572.7	39033.7	25580.7	19324.6	30273.2	43620.1	35107.4	33512.6	77655.9	68389.3	112488	88736.3	67290.4	55788.2	104247	94345.2	51858.4	42447.7	18937.6	29377.9	15835.6	12920.8	17237.1	18568.1	38433.1	42007.9	117615	83498.6	30485.3	30319.6	8941.47	15313	98672.2	90622	91042.7	81442.2	46603.1	42729.2	0	0	3512.63	8777.2	69219.2	69065.8	6555.39
M73/1436	14.58	2.9426e-08	1.3186e-06	own - 1103P; own - 3309C; own - so4	148348	126512	73236.9	75533.8	109370	140614	110241	108254	226574	208458	352472	281657	202444	177931	321093	291529	159114	134715	63181.8	84092.8	58894.3	45616.8	49185	51334.1	119146	126262	357896	257741	101712	97347.4	44465.5	52374	302618	292508	287797	261194	153283	119028	0	0	19388.1	22472	219301	212399	21479.7
M109/1436	13.739	7.4754e-08	1.4826e-06	own - 1103P; own - 3309C; own - so4	126267	108998	73701	70711.6	102093	118806	98205	97006	202035	174209	277166	237938	175692	155221	256660	238091	141862	115869	59182.1	86599	57897.2	52618.9	56957.7	51767.6	110608	118071	292023	215248	92910.2	90015	46127.7	49309.3	242530	234380	232896	217929	132324	117739	280.666	215.914	23525.2	23241.7	186488	175737	23891.4
M58/1436	4.5703	0.0044388	0.010257	own - 1103P; own - 3309C; own - so4	44477.7	38404.1	23293.9	20431.4	34092.7	40042.4	32383.1	32112.3	67856.7	62707.1	93509.7	80381.7	59879	53350.8	89713.5	81399.6	47501.9	40343.5	23155.2	28886.6	18292	17434.7	16076.7	16635.8	37102.3	40593.7	100534	73732.5	31018.3	29234.1	14641.3	16371	80252.1	80138.9	78913	71458	42785.4	39170.8	0	0	25121.6	38602.7	64055.2	58671.2	23704.7
M116/1436	13.805	6.9494e-08	1.4749e-06	own - 1103P; own - 3309C; own - so4	2.08264e+06	1.79985e+06	1.19102e+06	1.13458e+06	1.6033e+06	1.96026e+06	1.60795e+06	1.55286e+06	3.27202e+06	2.84985e+06	4.6138e+06	3.90904e+06	2.8781e+06	2.53697e+06	4.24585e+06	3.92307e+06	2.32415e+06	1.88921e+06	955646	1.39305e+06	898875	825000	894015	851799	1.80522e+06	1.89239e+06	4.81235e+06	3.55629e+06	1.52935e+06	1.46838e+06	756819	793261	4.02406e+06	3.88438e+06	3.90651e+06	3.48986e+06	2.17207e+06	1.92841e+06	3578.15	1643.04	304242	349912	3.05807e+06	2.90077e+06	317155
M62/1436	14.64	2.7527e-08	1.3186e-06	own - 1103P; own - 3309C; own - so4	78964.7	73750.7	31914.7	31681	55467.2	79039.8	62855.9	57198.4	144293	130026	205407	183219	117406	115019	192191	177935	105986	73510.8	34349.3	45785.5	38023.8	27739.7	38239.1	28190.6	78675.8	86592.5	226304	168517	51982	59600.4	19775.1	21598.8	173766	168067	153892	154153	92618.6	63157.3	0	0	10873.6	11519.4	130551	131374	11276.2
M125/1436	14.2	4.4753e-08	1.4749e-06	own - 1103P; own - 3309C; own - so4	84617.3	75970.3	15539.9	26501.1	67956.4	34638.9	53358.9	79481.1	182323	146326	243101	213758	158982	136228	247482	222790	109954	71807.8	43026.1	49169.9	45822.5	35286.6	33963.8	35934	66618.7	580.747	278668	196204	63448.7	70235.8	22399.5	16755	198723	207520	198346	14080.5	18689.1	21415.8	0	0	14459.6	16996.1	161798	148154	16283.3
M41/1441	3.7604	0.012476	0.025597	own - 3309C; own - so4	1.56208e+06	1.36857e+06	1.52366e+06	1499500	2.48753e+06	1.47029e+06	1.21703e+06	1.0753e+06	2.43522e+06	512230	3.38887e+06	1.93647e+06	2.13056e+06	1.6223e+06	1.51139e+06	1.49443e+06	509503	1.37962e+06	1.47578e+06	2.5146e+06	1.90117e+06	2.06109e+06	1.42924e+06	623366	1.35306e+06	1.33617e+06	405218	698187	1.14662e+06	1.10078e+06	1.76431e+06	1.50458e+06	2.96656e+06	2.86451e+06	2.84041e+06	2.57358e+06	407100	1.44333e+06	1.53593e+06	950480	2.72915e+06	3.06542e+06	1.3277e+06	1.48195e+06	5.59282e+06
M60/1446	6.1536	0.00060064	0.0020422	1103P - own; 1103P - so4; 3309C - own	1.14807e+07	4.48698e+06	3.57644e+07	3.46573e+07	4.48919e+07	1.92255e+07	1.89002e+07	2.26712e+07	2.15277e+07	1.44356e+07	4.28499e+06	5.01293e+06	1.61912e+07	2.16481e+07	2.13791e+06	8.40507e+06	1.35783e+07	1.04946e+07	4.60489e+07	3.99822e+07	6.1357e+07	3.7831e+07	3.69475e+07	2.89876e+07	5.59972e+06	2.89855e+07	1.02075e+07	1.94574e+07	3.18797e+07	2.59257e+07	5.67118e+07	3.46781e+07	9.7467e+06	3.64438e+06	9.65977e+06	8.88251e+06	9.93774e+06	2.3489e+07	3.33726e+07	2.34934e+07	2.82086e+07	3.35513e+07	4.53201e+07	3.35309e+07	5.58657e+07
M46/1446	5.2765	0.0018117	0.0048177	1103P - own; 1103P - so4; 3309C - own	156318	62872.2	471936	455556	556860	249571	252805	299615	292943	194291	123645	70679	241579	289846	32268	116710	184012	142185	543721	514865	530681	466562	487590	382116	77756.6	386640	138269	259579	418256	343608	447797	400679	130714	246268	129313	119608	131334	311157	411349	302499	617966	394569	411301	328054	583287
M43/1447	6.5654	0.00035913	0.0013355	1103P - own; 3309C - own	1.35612e+07	5.41884e+06	4.14727e+07	4.01659e+07	6.08036e+07	2.30011e+07	2.19538e+07	2.62381e+07	2.47738e+07	1.67729e+07	6.5655e+06	5.94639e+06	1.87322e+07	2.48231e+07	2.57203e+06	9.75552e+06	1.58275e+07	1.22514e+07	4.81468e+07	3.15777e+07	7.03035e+07	4.38854e+07	4.22747e+07	3.33534e+07	6.59902e+06	3.31223e+07	1.19307e+07	2.24126e+07	3.65954e+07	3.0002e+07	6.49909e+07	3.61098e+07	1.13794e+07	2.11054e+07	1.1325e+07	1.0458e+07	1.17616e+07	2.7119e+07	3.73264e+07	2.64096e+07	3.00944e+07	6.12155e+07	5.20823e+07	3.89999e+07	5.44799e+07
M45/1447	5.8171	0.00091617	0.0029125	1103P - own; 3309C - own	1.2565e+07	4.94019e+06	3.86574e+07	3.7505e+07	4.66751e+07	2.08909e+07	2.05215e+07	2.45989e+07	2.34576e+07	1.57696e+07	6.22148e+06	5.51593e+06	1.76576e+07	2.34832e+07	2.37301e+06	9.20651e+06	1.48658e+07	1.15264e+07	4.98538e+07	3.36978e+07	6.62464e+07	4.07485e+07	4.00376e+07	3.14238e+07	6.16243e+06	3.14082e+07	1.11603e+07	2.1157e+07	3.44129e+07	2.80486e+07	6.1e+07	3.75283e+07	1.06811e+07	1.99497e+07	1.05269e+07	9.71994e+06	1.08461e+07	2.5435e+07	3.54649e+07	2.52145e+07	1.82128e+07	3.61306e+07	4.90086e+07	3.63777e+07	5.55138e+07
M47/1448	6.0822	0.00065678	0.0022016	1103P - own; 1103P - so4; 3309C - own	15113.1	19532	145256	163981	189637	92204.3	85534	97630.4	99641	67156.8	24050.4	22890.3	77520.3	87265.8	30696.7	38053.4	64047.3	50417.6	104752	267095	190430	188597	162138	125770	12029.1	136892	45291.1	74943.2	147941	11420.7	225673	124043	45300.9	83231.8	26140	43367.1	49039	112985	108887	103935	359085	299860	152465	121419	274048
M61/1449	4.5583	0.0045072	0.010364	1103P - own; 3309C - own	2.1479e+06	911343	5.30595e+06	5.20143e+06	8.84967e+06	2.79311e+06	2.78883e+06	3.28901e+06	3.7744e+06	2.59301e+06	1.04941e+06	943366	2.85571e+06	3.76404e+06	430531	1.49383e+06	2.43516e+06	1.90074e+06	7.01044e+06	7.07852e+06	9.63662e+06	6.64371e+06	5.0932e+06	4.09932e+06	1.05256e+06	3.86909e+06	1.83791e+06	3.39565e+06	4.35711e+06	3.69222e+06	8.88029e+06	5.17223e+06	1.78181e+06	3.19311e+06	1.81653e+06	1.68687e+06	1.607e+06	3.43028e+06	5.81382e+06	4.00759e+06	1.60103e+06	89724.2	6.88871e+06	5.08628e+06	9.9971e+06
M42/1449	7.2494	0.00015377	0.00073197	1103P - own; 1103P - so4; 3309C - own	268467	104122	852249	818950	1.05125e+06	438500	446484	533031	509927	336632	131911	118210	377975	506806	50509.2	194763	320116	246682	1.05843e+06	1.00671e+06	1.1541e+06	936436	882076	687824	131444	685784	240012	458274	751912	611623	902045	819032	226497	428794	224135	210096	229130	554298	788890	536579	1.63754e+06	1.4664e+06	903626	802189	2.17443e+06
M69/1456	8.5151	3.2706e-05	0.00022562	1103P - own; 3309C - own; so4 - own	244767	3726.59	293350	281253	345711	274164	189351	187431	244223	208177	142173	120877	149357	138175	92481.3	97378.8	150944	132916	571704	456272	308956	324107	230149	207207	115368	137466	114016	150435	267979	304117	364026	323799	77403.1	12800	154026	150597	144108	176216	25622.5	5232.37	461431	459334	344403	310825	685283
M70/1456	8.3178	4.1555e-05	0.00028257	1103P - own; 3309C - own; so4 - own	526605	368847	599869	564531	711157	572384	379097	393065	465100	451022	412257	340362	336930	330442	94399.9	275331	358024	295149	1.09552e+06	908632	616638	629051	445139	408057	218987	303829	331403	341927	644487	615388	856656	708806	244896	267427	360865	334445	321457	395824	55427.6	14096.8	889619	897198	693183	697555	1.29033e+06
M137/1516	5.697	0.0010656	0.0031902	1103P - 3309C; 1103P - own; so4 - own	88828.1	87808.2	119235	129129	24706.2	140166	66368.7	90881.6	77302.2	71642	48239.9	49286.9	48706.5	69522.9	79100.6	68334.5	57044.4	52861.3	156326	115174	91650.2	100415	57323.1	54226.6	59699.4	57609.4	98809.2	130723	62345.1	55539.7	50710.7	61743.7	52765.6	59344.6	25326.8	28267.3	43534.9	49535.2	736.663	224.286	119944	124045	78783.4	77418.8	132321
M45/1520	9.3926	1.1375e-05	0.00010885	1103P - 3309C; 1103P - own; 1103P - so4; 3309C - own; so4 - own	255243	184198	267721	183373	638005	121873	196595	116372	189508	112666	253945	104405	210551	76715	69704.7	67824.1	82299.7	80776.6	320658	216610	195725	205538	96544.7	115012	69894.3	79884.6	74206.1	87438.5	203511	202699	272845	216196	117024	110635	117849	108127	107878	141315	29281.1	23941.3	343322	327862	211722	218057	279270
M77/1529	4.3335	0.006002	0.013105	1103P - own; 3309C - own; so4 - own	114446	183019	572652	633504	775721	196676	195845	260861	64360.1	119328	62044.9	92251	209911	310180	45896.3	62511.7	143377	149959	158707	262891	371571	337129	300338	303514	62995.7	77118.4	146155	158638	440553	439490	686615	662957	69296.2	84797.4	155437	174852	131134	150110	9502.73	10647.5	234299	299443	460516	458148	397722
M106/1529	4.657	0.0039753	0.0094142	1103P - own; 3309C - own; so4 - own	108546	170851	582735	632231	795058	194062	187780	252204	66235.2	96882.1	51609.3	57084.6	208795	301347	33082.8	47516.3	137808	141216	140579	269459	375587	347660	302825	278893	45926.6	71420.1	139924	151449	447575	440701	701168	677469	72035.6	82773.1	150899	161161	128505	136152	11920.9	9020.87	232590	294773	461192	445634	387895
M105/1529	4.2352	0.0068034	0.014787	1103P - own; 3309C - own; so4 - own	29924.1	55556.8	178105	198111	244558	51384.8	51377.6	85341	18717.5	35347.7	13582.2	27910.2	60748	90946.8	12869.4	17601.8	41496.2	42677.7	49012.4	82171.4	116189	105296	87394.6	95007.3	16861.3	23402.8	43265.5	46616.7	138666	137969	213708	207063	20849.7	22064.9	46578.1	52099.9	33634.1	44116.8	10597.9	2993.48	70698.4	91403.9	141716	141373	122768
M51/1529	4.8117	0.0032655	0.0080123	1103P - own; 3309C - own; so4 - own	113883	171826	527045	584962	721293	189418	187404	258726	65817.1	125971	64010.9	106215	191746	288907	41712.6	57371.7	129609	152050	155968	239032	320615	325777	277293	281033	63453.4	74207.3	127892	149956	418654	411821	637374	620026	65355.4	87669.8	146369	166631	121936	144480	15366.7	10072.7	224606	273852	434744	432364	367206
M61/1538	4.4872	0.0049343	0.011079	1103P - own; so4 - own	139559	195172	208305	442144	305115	597160	121922	166225	175179	270049	136371	146615	202708	139898	81993.5	87402.7	165324	102270	481155	512372	463506	548573	170156	173905	98254	120295	326561	246965	92049	92747	124837	183845	56431.7	62397.6	78418.6	46530.7	140024	113701	804.653	379.897	132789	172220	102974	91439.9	126188
M41/1538	4.9458	0.0027545	0.0069007	1103P - own; so4 - own	347665	501194	525588	1.0615e+06	761077	1.5749e+06	290759	358712	416197	649085	294122	313644	498735	337983	193007	109127	344589	214231	1.16407e+06	1.19038e+06	1.15789e+06	1.42718e+06	342346	407583	181417	270344	727625	332147	198700	207570	290256	468863	124594	60816.2	166593	106602	352967	263039	1003.42	356.561	323656	422382	237254	202800	260303
M73/1538	4.665	0.0039352	0.0094142	1103P - own; so4 - own	192969	283453	299086	609852	441654	902750	163868	214658	251941	364341	172262	183571	283972	194537	115179	98810.5	208672	127644	718158	749144	665323	818459	221012	232654	138651	154538	467045	350413	111582	120890	163681	268208	67617.3	72219	95207.2	61148.5	202355	147748	34.1367	40.2467	187455	237257	136417	116675	187150
M60/1538	4.695	0.0037875	0.0091982	1103P - own; so4 - own	83185.3	127140	133077	280333	201147	420597	76222.7	97757.3	115273	169914	82656.5	84167.6	128903	89279.9	54113.3	43936.2	96085.1	54060.3	336616	347150	309749	377239	102750	110266	59255.2	73559.8	218229	159151	46583.2	47675.5	68143.9	122012	30077.8	32984.9	44282.1	26601.7	93040.4	68305.6	0	0	86117.7	109830	43217.7	47209.3	84296.1
M89/1538	4.6204	0.0041648	0.009718	1103P - own; so4 - own	74687.9	111226	115970	238090	172734	356820	63304.7	84769.7	98773.4	144046	69496.7	71294.4	111328	75647.9	45884.9	36858.2	79946.9	47384.7	282589	296080	263272	323725	85965.1	88125.5	53960.2	62214.6	185370	138050	43644.5	46645.4	59449.5	105028	22119.8	25499.2	35079.6	23094.3	79070.4	56741.7	0	0	72103.5	92356.7	51006.2	41863.1	71809.8
M101/1538	5.7915	0.00094608	0.0029433	1103P - own; so4 - 3309C; so4 - own	152027	226832	229970	465187	338343	688178	127552	169421	202944	283998	107679	146260	168126	113611	91813.4	50684.3	109627	88296.4	503922	511714	499915	566739	181095	187156	105337	114299	316069	279090	100741	96166	130466	226479	67556.1	64809	124936	57331.8	167105	125527	64568.1	2750.63	162202	201377	97539	108146	153759
M70/1538	5.2355	0.0019081	0.0050181	1103P - own; so4 - 3309C; so4 - own	160315	232279	246980	488568	363025	718316	134264	183185	221891	310353	182294	203379	241754	183731	101758	113004	190794	110934	583107	595715	535740	659616	188972	194317	117065	152467	383789	298872	104747	106357	142894	226536	59723.5	84562.1	84020.7	78029.1	166664	127627	34706.3	3908.07	171318	215539	125273	100784	167229
M143/1538	4.8392	0.0031535	0.0077776	1103P - own; so4 - own	173222	234729	267935	534958	371406	777071	147834	155513	212285	312517	160713	157466	218804	131794	88707.3	71181	141827	78531.4	559116	631954	529460	683961	161929	170204	82472.4	124576	351926	278652	101336	104436	147261	244621	64804.8	67038.9	85085.1	39045.3	177894	131227	960.075	342.152	149461	181454	85039.9	15400.7	162036
M141/1538	4.4521	0.0051597	0.011531	1103P - own; so4 - own	91607.8	135311	142114	294778	206066	434175	77558	104964	120134	178919	86572.3	88826.7	134705	95043.3	62798.7	48759.4	101899	62876.1	342498	359446	320113	389807	109889	114918	68097.5	76924.7	228238	169333	54594.4	57420.8	70489.4	135130	25992	20549.3	50449.4	29947.3	98251.6	73533.3	444.103	187.089	171751	120164	66849.5	57753.8	91914.2
M88/1538	5.325	0.0017037	0.0045818	1103P - own; so4 - own	190937	286588	288233	582176	439236	858514	162745	204274	258079	353695	180237	183073	275572	187905	120950	97833.9	205433	126006	683057	706662	628470	760914	219839	227439	139082	161092	452774	332859	119449	119501	159017	259948	62525.2	72870.8	94875.9	67537.8	209246	146304	67215.9	2126.1	183763	234723	138947	119003	181162
M157/1538	4.6598	0.0039612	0.0094142	1103P - own; so4 - own	894674	1.31525e+06	1.40056e+06	2.78399e+06	2.03646e+06	4.13074e+06	755823	999719	1.17229e+06	1.70375e+06	806064	853588	1.30861e+06	868273	542653	412638	915697	592032	3.11402e+06	3.41279e+06	3.04157e+06	3.70334e+06	1.00729e+06	1.07097e+06	638665	711367	2.15617e+06	1.62327e+06	524156	564473	748028	1.23109e+06	322730	349776	441086	299218	936404	694383	2037.57	1123.45	869302	1.09381e+06	619258	541288	855161
M71/1538	5.1016	0.0022605	0.0058162	1103P - own; so4 - 3309C; so4 - own	70033	109519	113079	230382	164209	339798	58821.2	85516.6	97808.7	136316	51527.4	70223.7	106956	76291.8	42919.2	25264.4	78451	50506.9	273344	280469	253016	304640	85406.8	89825.8	54487	60060.3	175866	131881	37592.9	48605.3	60223.6	100121	23221	23854.2	36456.1	20768.3	77117.2	52427.4	170.228	112.289	71905.6	84161.9	55439.3	49416.9	74812.5
M41/1572	8.2813	4.3441e-05	0.00029124	1103P - own; 3309C - own; so4 - own	227673	154456	421542	466477	578465	271856	206664	289284	325166	273409	124466	159174	215432	306619	80210.8	173767	244187	193742	642544	772421	543456	506723	370586	304340	94996.3	272055	124490	215644	429076	338516	633352	409816	170517	213347	177598	154793	173353	252828	240188	73722.9	1.44201e+06	1.70426e+06	486947	427262	1.08454e+06
M43/1573	8.2357	4.5913e-05	0.0002954	1103P - own; 1103P - so4; 3309C - own; so4 - own	524013	341180	905931	981861	1.28489e+06	590702	497238	601799	765601	570361	318858	286583	443408	554006	152358	335706	492852	351456	1.03475e+06	1.57783e+06	897117	1.20133e+06	557363	917343	194832	884610	275892	373047	915091	734030	1.37564e+06	890246	377642	500656	410884	345691	374571	507304	527620	252379	3.43183e+06	3.74896e+06	1.05801e+06	841939	2.31754e+06
M88/1573	5.9141	0.00081106	0.0026625	1103P - own; 3309C - own; so4 - own	61990.4	39700.9	112386	123672	191203	72037.3	51245.9	65428.6	93954.3	66872.6	26702.3	30160.2	57706.4	89664.3	27726.3	36352.2	52429.2	37083.2	170908	194835	133123	61922.7	93102.3	73201	24432	61591.7	31880.5	57409.5	117378	87778.9	176287	109483	56954.7	55568.1	46380.2	48583	49278.4	70251.8	58868.3	16384.7	573405	509065	129353	109724	315547
M73/1573	8.0536	5.7324e-05	0.00034408	1103P - own; 3309C - own; so4 - own	306812	230115	517742	553136	721034	339925	301481	355394	411421	331693	224141	208308	315651	386306	167219	257183	328670	268275	762833	890602	669433	675472	459583	392277	153621	356030	186555	294291	568868	463508	777113	498310	266288	306472	282834	259137	260104	379950	296262	93526.7	1.61569e+06	1.92951e+06	602133	614873	1.26991e+06
M137/1600	4.9008	0.0029163	0.0072679	1103P - 3309C; 1103P - own; so4 - own	40525.5	59637.4	90473.3	114969	35845	86601.4	54355.5	75518.4	50470.1	56800.8	25183	32906.7	41475.8	47453.1	67600	53240.3	40137.7	37343	125348	83149.1	77640.5	80620.9	41992.3	35158.6	49533.7	42945.3	61803.5	94088.1	43967	57021.8	53597	55986.9	30599.5	46455.4	12767.5	1031.22	32919	37895.5	170.464	40.5974	83477	98343.7	56062	64101.9	100357
M56/1641	7.4906	0.00011425	0.00060896	own - 1103P; own - 3309C; own - so4	264559	325785	192062	266178	69026.5	528160	184959	202374	436677	415630	520079	416829	623005	284558	387988	350944	457673	238241	216124	248415	262905	260339	164133	152211	220073	248196	976971	520344	108371	108075	119841	217107	276137	297159	471741	230527	446800	290811	27179.2	520.537	95325.5	95687	279836	236370	79345.5
M85/1641	6.958	0.00022051	0.00092996	own - 1103P; own - 3309C; own - so4	303777	362846	219378	302316	395077	606267	200410	228540	489773	471000	609834	473418	711267	317258	442471	405849	520667	269279	239387	274826	299360	286935	180155	170657	247283	268420	1.13106e+06	578735	140863	142281	144193	257470	332171	322721	538890	264267	515922	336106	691.799	35.6508	113818	115524	329369	258644	88748.2
M95/1641	6.2029	0.00056467	0.0019337	own - 1103P; own - 3309C; own - so4	119166	160544	20960.9	27582.1	185623	304770	89251.6	113746	217728	250967	293143	229132	361153	148516	228004	194657	252162	122819	131076	140040	179991	155377	77758.2	77338.6	129619	119972	591962	294491	47413.9	17347.2	38627.9	154922	123890	167231	252623	126074	260302	150124	387.6	33.882	49982.8	85918.2	154192	141923	53180.3
M57/1642	5.5733	0.0012453	0.0035075	own - 1103P; own - 3309C; own - so4	2.92535e+06	3.47522e+06	2.12117e+06	2.82692e+06	3.64091e+06	5.01238e+06	1.98409e+06	2.14994e+06	4.51516e+06	3.83626e+06	5.82532e+06	3.54054e+06	5.45306e+06	2.70358e+06	3.3725e+06	3.60786e+06	3.79203e+06	2.58677e+06	2.14979e+06	2.5911e+06	2.48538e+06	2.48532e+06	1.40586e+06	1.61766e+06	2.01116e+06	2.30422e+06	1.79481e+06	2.37872e+06	1.28022e+06	1.32842e+06	1.38375e+06	2.3528e+06	3.22288e+06	3.12616e+06	5.20432e+06	2.54127e+06	5.02448e+06	3.21612e+06	6911.17	1679.61	1.06486e+06	1.08359e+06	3.08241e+06	2.43735e+06	747460
M60/1642	6.9386	0.00022587	0.00092996	own - 1103P; own - 3309C; own - so4	246969	298717	179092	240064	309805	498516	168481	185548	387764	390653	500892	382554	597193	254436	366499	326841	426993	221740	190190	222067	233865	228814	131272	135666	203522	196766	942712	467359	107496	109124	116236	199212	272956	265416	444992	216872	427229	275885	152.577	0	84610.2	89542.8	266298	209298	65842
M90/1642	7.1824	0.00016703	0.00077193	own - 1103P; own - 3309C; own - so4	40101.1	52614.1	30886.5	40457.6	56376.6	88986.4	6150.59	30516.2	65963.9	65810.9	88789.8	64512.1	104559	43323.7	62482	57149.8	69911.8	37725.8	30308.2	38656.2	43600.8	41220.6	21524.7	22331.6	28072.1	34510.2	167536	84120.5	16249.1	14885.8	17669.8	32418.8	47214.4	47170.3	76506.6	34233.8	70351.6	43868.1	0	0	19488.4	16030.7	45748	38221.1	9141.07
M112/1642	7.0341	0.00020067	0.00087631	own - 1103P; own - 3309C; own - so4	1.24707e+06	1.49945e+06	901421	1.22267e+06	1.56243e+06	2.54289e+06	847860	915592	1.95435e+06	1.98164e+06	2.55449e+06	1.94798e+06	3.04026e+06	1.26118e+06	1.84846e+06	1.63868e+06	2.16081e+06	1.10643e+06	941862	1.10695e+06	1.16776e+06	1.15434e+06	637861	680681	1.00342e+06	990901	4.90396e+06	2.38154e+06	538617	565664	580049	997999	1.38276e+06	1.34346e+06	2.26707e+06	1.08824e+06	2.18902e+06	1.38453e+06	1489.66	281.397	445487	450921	1.3222e+06	1.0393e+06	305240
M155/1642	6.5074	0.00038601	0.0014244	own - 1103P; own - 3309C; own - so4	1.15619e+06	1.33763e+06	864628	1.1297e+06	1.46025e+06	1.75278e+06	796729	797816	1.75898e+06	1.44209e+06	2.19479e+06	1.3816e+06	2.19768e+06	853058	772913	1.31182e+06	1.3152e+06	947823	638208	941640	909186	933254	441807	621326	869672	908144	1.02115e+06	1.32055e+06	548143	575139	599016	974006	1.2724e+06	1.23282e+06	1.96221e+06	1.02862e+06	1.88415e+06	1.25899e+06	23890.8	14149.5	495731	516310	1.15433e+06	989509	383403
M73/1642	7.5124	0.00011122	0.00060162	own - 1103P; own - 3309C; own - so4	496395	718590	308930	607299	769277	1.18847e+06	384941	471467	957162	904300	1.22325e+06	953248	1.40611e+06	653909	898776	817068	1.03758e+06	556008	490174	568270	606775	581751	344405	289931	492117	521120	2.20267e+06	1.16114e+06	32433.4	288317	173205	499073	415268	658519	985527	513860	1.06153e+06	653304	2701.26	1409.97	208246	232953	652800	513675	157954
M102/1642	6.3604	0.00046374	0.0016473	own - 1103P; own - 3309C; own - so4	42910.9	47815	31306	39582.6	51286.7	77301.8	25557.7	31532.8	59051.8	61853	77782.3	60697.9	88707.5	42361.7	58437.3	50435.6	66720.7	33649.2	33401.2	36185.5	37587.8	37944	23375.6	24284.5	30814.2	33233.1	137251	72817.6	17915.3	20219.1	20505.1	33973.5	44802.6	43471.6	68424.9	35106.8	65944.9	45155.5	244.511	266.565	17140.6	16191.1	43693.4	34596	12055
M89/1642	7.2718	0.00014959	0.0007256	own - 1103P; own - 3309C; own - so4	992402	1.1658e+06	725210	973660	1.34336e+06	1.89222e+06	687042	742904	1.61087e+06	1.50905e+06	1.91573e+06	1.50018e+06	2.23274e+06	1.07219e+06	1.40281e+06	1.26755e+06	1.6424e+06	881700	761241	889309	932439	922182	561221	562076	795327	834362	3.41824e+06	1.79621e+06	569084	467010	483577	805804	1.08043e+06	1.05608e+06	1.70722e+06	865750	1.63944e+06	1.08564e+06	39841	3786.31	380427	398340	1.04351e+06	830489	279402
M43/1642	6.9666	0.00021815	0.00092996	own - 1103P; own - 3309C; own - so4	1.37893e+06	1.62972e+06	1.00288e+06	1.34365e+06	1.75916e+06	2.68622e+06	942247	1.02831e+06	2.14555e+06	2.11934e+06	2.7108e+06	2.097e+06	3.17562e+06	1.4301e+06	1.98161e+06	1.76636e+06	2.31551e+06	1.22291e+06	1.05263e+06	1.22317e+06	1.28306e+06	1.27097e+06	747277	771872	1.11036e+06	1.11005e+06	4.94833e+06	2.52619e+06	616051	644592	664791	1.11563e+06	1.50804e+06	1.47308e+06	2.41634e+06	1.19993e+06	2.3259e+06	1.51885e+06	5524.12	2108.98	510799	537563	1.44948e+06	1.16228e+06	379660
M58/1642	6.938	0.00022603	0.00092996	own - 1103P; own - 3309C; own - so4	625493	754068	457258	616408	789135	1.25707e+06	435613	470284	979525	985449	1261793	977786	1.48878e+06	641395	924475	822416	1.07984e+06	562428	482003	563565	596441	586198	332003	351824	513097	507471	2.33662e+06	1.18388e+06	272997	289439	269047	504744	688772	673905	1.12287e+06	553528	1.08154e+06	699451	1076.4	419.007	227484	235256	669155	530585	163797
M101/1642	7.2646	0.00015091	0.0007256	own - 1103P; own - 3309C; own - so4	46682.6	55273.9	32509.7	45306.1	59584.7	97365	30916.7	33315.9	68791.4	75678.3	95045.9	74080.8	114219	48342.6	71349.7	63525.2	81409	41906.5	35072.6	42215.9	44265.9	43843.3	25220.1	26179.8	36466.5	38582.1	182660	89931.5	19850.3	21177.2	17851	39993.7	48831.2	49219.2	85749.7	41086.5	82864.4	51976.1	0	0	11966.7	18048.1	50824.4	38279.3	10635
M68/1642	7.0573	0.00019498	0.00087559	own - 1103P; own - 3309C; own - so4	42746.6	52518.3	27802.6	43722.5	54310.7	88523.4	27627.2	28806.7	69781.5	70182.3	90244.3	69775.7	107603	44256.9	64581.6	57470.1	77770.7	37124	33147.3	39889.2	42070.5	41997.7	21812.2	22756.9	34198	34775.4	173386	85556	17634.9	18851.6	18609.9	36388.3	44436.5	46519.1	78591.5	38519.1	76598.2	48500.8	0	0	13803.2	12517.6	46339.6	37342	12621.3
M83/1642	6.8656	0.00024727	0.00098908	own - 1103P; own - 3309C; own - so4	42080.5	48148.8	28178.9	35268	53163.6	83887.4	23927	27137	64160.9	65606	79256.7	62229.4	94439.3	39645.2	62274.8	54583.7	66750.1	37380.3	30018.1	36202.2	36551.3	36394.3	17366.6	22846.3	32114.5	31089.5	166151	76026.9	12678.9	17690.1	16282.2	29936.6	40249.2	39735.7	73712.5	31129.4	69391.6	42337.8	0	0	10331.6	11705.2	41028.6	32541.4	6166.64
M173/1642	6.9339	0.00022719	0.00092996	own - 1103P; own - 3309C; own - so4	331749	404684	243490	328096	429095	693339	230023	249116	530580	539826	694590	535253	826130	346884	505612	445217	590108	298551	257355	299837	317684	316914	178640	188065	273763	267403	1.35104e+06	654564	145887	152012	153323	270901	372021	364955	616661	293486	598260	377233	60.2205	41.5543	111789	123204	353693	284289	84301.4
M158/1642	7.3234	0.00014037	0.00068883	own - 1103P; own - 3309C; own - so4	42819.8	48552.9	30720.7	41585.8	52038.4	87936.1	27122.1	31389.9	64891	68435	85750.5	67224.6	105329	40104.8	63606.6	57115.8	70151	36417.1	31231.9	36460	36425.7	38790.2	20754.7	23608.6	32445.8	32873.2	165770	82647	13990.1	17851.2	18561.3	32202.9	46405.4	45326.7	77361.2	37924	75404.7	46480.1	0	0	13367.9	12203.3	45915.9	36109.5	8604.09
M144/1642	7.0698	0.00019199	0.00087365	own - 1103P; own - 3309C; own - so4	1.12048e+06	1.35215e+06	801633	1.09966e+06	1.40173e+06	2.29824e+06	758250	828997	1.76128e+06	1.78526e+06	2.30668e+06	1.76031e+06	2.7539e+06	1.14208e+06	1.66649e+06	1.47889e+06	1.95641e+06	1.00104e+06	847601	998529	1.0493e+06	1.04412e+06	588513	613074	906337	892838	4.47556e+06	2.15324e+06	476934	507182	520627	893999	1.24276e+06	1.21066e+06	2.03944e+06	968838	1.98292e+06	1.24979e+06	985.97	226.498	402791	409204	1.18493e+06	934728	288356
M41/1642	7.3474	0.00013628	0.00067571	own - 1103P; own - 3309C; own - so4	116738	142410	83953.9	113407	144436	223528	80297.3	78525.1	188925	186676	239779	184144	281010	114433	163158	146383	187378	99235.1	88612	105567	85314.4	109686	60157.8	60982.2	91271.9	89310.7	386423	222258	48858.7	48736.1	54078.6	93393.7	127200	123730	217205	97717.8	211327	129505	0	0	39817.7	40170.6	118123	98403.9	26949.4
M157/1642	7.0348	0.00020049	0.00087631	own - 1103P; own - 3309C; own - so4	191651	227353	133773	185726	238809	397213	124582	139776	302864	305761	395110	301552	474944	196281	286374	253843	332678	169233	144015	168912	177702	177339	98605.1	104339	153912	151775	778158	369395	81747.8	86118.6	88253.2	153232	211097	206702	351085	163230	339492	212954	48.4019	0	66862.1	69955.2	203223	160572	48141.8
M116/1642	7.3957	0.0001284	0.00065721	own - 1103P; own - 3309C; own - so4	40931.2	53180.2	25330.4	35556.6	68.7934	78225.7	28842	32488.2	58476.4	51161.6	80600.7	56197.4	109122	43168.8	31860.8	51836.9	64449.8	38201.1	25440.4	32419.7	34437.3	37993.8	18582.8	23293.6	24912	21070.8	158734	65876.6	15897.6	20283	12351.3	30730.6	42712.2	45600.2	84116.5	37022.2	81895.3	46665.8	0	0	14790.5	17170.1	32230.3	33730.4	7736.55
M171/1642	7.2135	0.00016075	0.00075015	own - 1103P; own - 3309C; own - so4	1.08999e+06	1.27386e+06	800512	1.05822e+06	1.44056e+06	1.82372e+06	756995	854614	1.71322e+06	1.54696e+06	2.1408e+06	1.54918e+06	2.28906e+06	1.06507e+06	1.53112e+06	1.31266e+06	1.45281e+06	953413	754512	994727	793138	970194	611072	641433	854459	924961	840932	1.52589e+06	577115	573032	577406	905174	1.18474e+06	1.19869e+06	1.86616e+06	951449	1.7978e+06	1.18993e+06	47140.8	3198.77	409192	548288	1.08964e+06	939372	315333
M143/1642	6.2793	0.0005132	0.0017831	own - 1103P; own - 3309C; own - so4	57774.1	66179.1	43241.7	60818.9	76103.3	104048	45747.8	47826.6	90781.4	82267.9	108914	84300.2	126110	61902.7	78549.1	76736.2	91100.7	52936	51047.3	53196.2	58557.6	55807.4	38726.7	38236.6	48055.2	52706.7	181553	104523	27024.9	28629.8	28344.5	53339.2	61472.8	63376.1	95495.8	52356.2	92938.2	65460.2	817.598	443.878	25599.7	26251.8	61844.4	54306.6	17180.6
M69/1642	5.8104	0.00092391	0.0029125	own - 1103P; own - 3309C; own - so4	385445	444724	298824	396012	496374	684201	364222	297082	610873	546095	717396	543002	825033	372006	500269	497564	582121	356238	297525	396808	386559	403703	243683	247351	311615	320620	1.24607e+06	649484	238215	259610	197397	425295	423259	431573	654829	385056	626922	465063	55410.5	55060	234565	275437	445249	348628	229244
M70/1642	4.1768	0.0073298	0.015716	own - 1103P; own - 3309C	1.14548e+06	1.16383e+06	832246	736885	1.42616e+06	977179	774239	515122	1.51143e+06	787657	1.69636e+06	986719	1.80444e+06	567775	349030	965104	1.33844e+06	757319	547915	773074	671021	752853	382249	475826	582578	402195	3.41934e+06	1.67834e+06	527314	548667	568477	942960	1.23598e+06	1.2262e+06	1.86201e+06	927448	1.62756e+06	937940	5199.05	3223.86	441136	473856	1.09242e+06	849838	230720
M130/1642	6.7739	0.00027707	0.0010899	own - 1103P; own - 3309C; own - so4	913748	1.08681e+06	673513	907413	1.13027e+06	1.76734e+06	637502	682414	1.39468e+06	1.40263e+06	1.78099e+06	1.39214e+06	2.07363e+06	930165	1.31247e+06	1.17488e+06	1.52223e+06	826575	705993	821682	859903	852912	497209	515160	740303	737649	3.16683e+06	1.65829e+06	412891	431692	443618	748187	1.00868e+06	979153	1.59352e+06	804485	1.53054e+06	1.00983e+06	1205.95	339.04	344148	355094	965818	772985	249457
M61/1642	7.7795	8.0138e-05	0.00047093	own - 1103P; own - 3309C; own - so4	91922.7	124384	76426.3	100431	2536.1	218730	57651.9	70542.2	154378	175596	205006	173933	261219	115983	161026	138612	189022	92821.1	79431.5	93674.2	102883	103836	53163.5	60821.2	87388.3	76390.8	420254	209712	11145.8	43409.8	44780.7	69581.2	88219.2	4391.02	186934	92268.2	183771	120308	41.427	37.3682	24266.6	38129.3	106860	87601.4	21596.3
M71/1642	6.9289	0.00022858	0.00092996	own - 1103P; own - 3309C; own - so4	655707	792121	419385	664599	808361	1.31308e+06	440152	499804	1.02467e+06	1.03111e+06	1.30402e+06	1.01699e+06	1.54192e+06	676072	950972	858572	1.12595e+06	594994	509867	591992	659912	634614	351841	375854	542343	536742	2.44359e+06	1.24199e+06	184093	293660	209281	546881	684489	658775	1.16865e+06	580707	1.12698e+06	705599	1114.59	230.794	226710	263153	638528	557558	182417
M72/1642	6.9137	0.00023294	0.00093965	own - 1103P; own - 3309C; own - so4	1.26123e+06	1.48711e+06	906687	1.23093e+06	1.54303e+06	2.29054e+06	844024	843645	1.71672e+06	1.54635e+06	2.36348e+06	1.48846e+06	2.47935e+06	1.26199e+06	1.49186e+06	1.32322e+06	1.73639e+06	1.11287e+06	903330	1.00939e+06	810510	1.12974e+06	565079	654881	752252	584350	2.84208e+06	1.38077e+06	546558	573654	599000	1.01602e+06	1.3799e+06	1.31857e+06	2.20529e+06	1.08099e+06	2.1246e+06	1.37822e+06	1403.5	545.123	455794	435843	1.31493e+06	1.05417e+06	310388
M44/1642	6.4973	0.00039094	0.0014314	own - 1103P; own - 3309C; own - so4	585424	692506	427363	580917	708727	1.14131e+06	405801	440968	871911	895465	1.12677e+06	879368	1.32383e+06	593075	838726	743288	964686	519409	474845	526830	568176	564845	313462	324189	471537	463726	2.07086e+06	1.06156e+06	255657	265264	288946	487664	613311	609369	1.0047e+06	504250	967899	638314	1182.08	381.723	247278	227626	612749	500479	179953
M45/1642	6.4596	0.00040975	0.0014889	own - 1103P; own - 3309C; own - so4	38809.6	46108.9	27988.3	37640.1	48349.8	74704	28842.6	28714.2	59540.7	60394.7	75576.5	56691	86393.6	40133.9	54263.1	49932.2	62396.5	32817.8	31480.6	34984.5	37333.7	38492	23021.9	21192.4	31171.8	31069.9	135927	70703.1	18155.9	20040.1	18793	33371.9	40642.7	42127	66081.7	34077.2	65515.4	42444.4	431.471	315.576	18542	17930.9	40466.8	33948.4	13971.1
M82/1642	5.5591	0.0012679	0.0035292	own - 1103P; own - 3309C; own - so4	60812.9	68205.1	39489.3	62179.3	68603.6	115238	40058	45585	83339.6	84512.2	112638	86224.7	129598	58487.1	80357.5	72850.7	93863.4	48435	51846.3	54676.8	57097.9	61461.5	51525	31114.4	45955.1	41415.5	203201	98826.6	17442.4	22303.2	25318.5	41086.6	54921.9	53634.6	94065.7	38332.2	92002.9	60482.8	36.1426	0	27252.6	30434.4	64669.9	51074.4	25341.3
M55/1642	7.5298	0.00010887	0.00059567	own - 1103P; own - 3309C; own - so4	339182	412238	166624	371185	439293	747079	219098	269657	522303	569775	746577	578530	873630	373583	530214	460389	618701	286705	272214	331732	364869	300002	196000	197235	308686	288568	1.41287e+06	696586	95237.6	117145	96448.6	278663	374093	396825	633804	286001	621561	387271	642.626	42.2426	97278.7	121718	378949	260867	87281.6
M77/1673	8.1029	5.3975e-05	0.00032939	1103P - own; 3309C - own; so4 - own	233763	240710	438115	454618	357097	358706	189895	225293	163555	194261	126679	135401	124590	146373	100800	109381	122379	129024	932111	714096	435009	472588	209926	214624	145694	149123	209539	248473	332311	340719	938925	844166	139482	136811	123715	135024	131389	137477	31740.1	18963	800985	786834	539913	563173	568738
M105/1673	8.2245	4.6545e-05	0.0002954	1103P - own; 3309C - own; so4 - own	99729.6	95317.4	179812	188620	144701	143165	73859.8	72623.3	50955.5	73164	40468.1	44310.9	47510.2	56894.1	45574.8	32091.9	46467.8	48495.4	380011	281882	161064	193250	76397.9	68261.5	51127.3	58532.8	82936.3	93911.5	137310	134973	384694	351783	53793.4	58794.5	53924	53768.1	61931.5	43848.5	14620.8	6864.1	335395	326618	195783	229665	242080
M122/1673	8.1276	5.2378e-05	0.00032379	1103P - own; 3309C - own; so4 - own	63405.8	66814	125930	129017	103017	105747	53118.3	59809.9	44721	48058.6	27107.4	51320.5	33125.9	39319.9	29512.2	28081.2	29039.6	33488.2	276557	199221	125965	135915	58614.2	55853.2	39119.9	42249.2	61733.8	68785.7	91382.6	92315.1	275096	252215	36338.6	36467.9	31664.3	28130.7	39187.1	36369.7	7868.49	4555.42	241874	229233	154180	155270	168483
M41/1675	6.6795	0.00031157	0.0012057	1103P - own; 3309C - own	125352	68303.6	279201	309077	273732	176186	125308	158919	171384	155079	70342.2	153946	99760.5	128184	74722.3	75700.7	106446	97819	458780	494821	342318	334476	153101	202231	182252	68560.8	175261	106095	225467	193489	402058	280657	82036.2	107404	114733	83381.6	263451	123354	108323	32938.5	1.00751e+06	1.06138e+06	267303	269806	625180
M42/1675	6.2128	0.00055774	0.0019238	1103P - own; 1103P - so4; 3309C - own	37111.5	23936.9	80792.6	80921.2	87714.5	46044.5	33182.2	48105.3	48179.1	38147.3	20223.7	35045.5	24319.7	37246.1	22388.5	20431.8	27452.3	27366.2	115863	143775	108261	113299	39120.4	47555	19007.6	36451.2	17560.5	30506.4	64337.1	59147.4	117685	71712.4	20079.3	28931.2	25428.8	24064.5	28177.3	30874.1	37479.6	9753.57	305359	326896	67275.4	58995.6	195957
M60/1675	9.3272	1.2299e-05	0.00011258	1103P - own; 1103P - so4; 3309C - own; so4 - own	117557	98025.5	250065	282596	304175	169945	122338	155223	165088	128586	83100.9	83094.3	97902.7	125367	46142.3	68370.8	100615	85479.4	468254	487590	337275	360109	163751	137505	36908.9	123352	59298.1	230734	202344	193126	380477	276511	85402.4	96500.8	88807.4	80249.4	115027	118504	121909	46910.8	987803	1.04608e+06	279277	266571	641177
M43/1675	9.4548	1.056e-05	0.00010472	1103P - own; 1103P - so4; 3309C - own; so4 - own	294753	223269	712399	789319	803811	449654	331313	418436	420774	365179	169302	216579	239044	348588	131753	178677	276633	224493	1.34982e+06	1.46835e+06	1.0236e+06	1.047e+06	471094	417316	170771	322717	176009	264439	555813	485073	1.0797e+06	700246	182554	242923	200642	182683	239220	326515	335514	95105.4	2.9571e+06	3.14448e+06	653505	587638	1.73752e+06
M87/1675	8.6337	2.8333e-05	0.00020434	1103P - own; 3309C - own; so4 - own	85869.6	63111.3	209217	226138	236575	117978	96322.8	97459.2	129761	113398	46199.4	70430.7	61199.9	108813	38159.7	65249.7	81055.6	62075.6	374664	431719	274946	299196	121891	124745	43052.9	78785.7	41650.6	73406.7	173338	147680	319857	209044	55551.5	78847.4	60184	54633.5	64226.7	98157.9	75917.2	22056.2	867089	916322	201446	163595	530083
M74/1676	10.703	2.412e-06	2.8703e-05	1103P - own; 3309C - own; so4 - own	145052	113073	286703	319995	300076	182331	127654	157742	182846	170348	86800.5	95976.9	80034.3	138598	43972.4	72105.7	110989	98276.4	490892	539943	333884	340422	179044	175018	62934.9	138089	68177.5	100450	235296	202870	406933	264161	89091.3	111999	92194.7	99926.7	94920.6	121949	106714	27876.9	966959	1.01289e+06	271039	272129	676914
M61/1722	3.4048	0.019655	0.039311	own - 1103P; so4 - 1103P	128648	268898	60607.5	161672	34179.3	223767	146195	303071	208248	412688	165625	348584	137948	263950	249755	246220	193997	172864	103243	124254	90369.7	104178	190366	166916	280771	253817	184747	193334	161478	173453	117424	109345	216305	231494	204077	184317	180510	164628	2080.75	422.905	46493.8	79666.1	111955	101185	74866.5
M106/1722	3.6114	0.015093	0.0304	own - 1103P; so4 - 1103P	79500.1	154035	37639.7	93891.3	17905.5	130628	86238.1	176750	133915	243871	110321	204403	84545.5	167791	145950	150102	115057	101081	66702.8	68718.9	56604.2	62977.5	117524	100177	161106	153802	108558	126730	113106	105004	72622.5	64485.5	125708	143297	115935	105451	102554	101267	956.236	287.804	28224.3	46883.5	66657.8	56712.1	41993.6
M45/1793	8.7778	2.3804e-05	0.00018504	1103P - own; 3309C - own; so4 - own	29599	32185	64118	59824.2	32782.8	45507.5	20158.1	29237.6	20299.2	26033.5	9758.04	12771.3	17998.1	19037	9149.64	8549.5	18511	13714.8	149327	112115	86992.4	93023.4	46419.6	44459.2	16344.6	18329.7	7391.65	11148.3	64956.8	65989.6	97798.5	83492.3	13024.6	6779.88	21737	19815.3	31759.7	32626.2	986.391	218.652	142936	142303	73373.6	76272.1	163433
M136/1793	9.0086	1.8025e-05	0.00015531	1103P - own; 3309C - own; so4 - own	130885	138013	295396	320578	162812	180469	111796	130537	107599	111759	46564.5	53466.1	72952.9	98196.1	42014	42009.1	78513.1	73618.5	684696	532693	346053	385497	213614	216403	58140.8	84602.6	56581.8	63275.3	286092	277744	395126	356400	46345.2	41035.2	80546.7	84023	129110	136097	6226.54	1363.3	647429	628143	309385	344892	734675
M119/1793	9.0348	1.7468e-05	0.00015398	1103P - own; 3309C - own; so4 - own	39801.7	42846.4	88401	102752	49642.8	52932.6	30625.4	41734.1	32799.3	29853.6	11029.3	8072.89	25887.1	27374.6	11790.8	13625.1	21402.7	23323	226413	177113	112671	116854	62434.8	68736.7	21728.5	23567.4	14958.2	20096.1	86026	91127.2	125575	116730	14153.4	11870.2	19337.7	25285.1	39113.1	40980.6	1560.02	544.953	214435	193794	101907	111767	248425
M65/1793	7.4494	0.00012019	0.0006287	1103P - own; 3309C - own; so4 - own	780899	1.14359e+06	2.52336e+06	2.83909e+06	1.14341e+06	1.53101e+06	689928	1.09902e+06	695891	986763	348387	433406	460522	817844	342122	319985	644195	544746	6.45683e+06	4.84846e+06	3.22173e+06	3.46103e+06	1.94145e+06	1.8534e+06	700924	686016	451532	526006	686632	2.04292e+06	1.47923e+06	2.83725e+06	83886.1	212258	320134	514700	607933	1.05794e+06	50489.8	22578.9	5.73287e+06	5.62738e+06	2.95368e+06	2.97508e+06	6.82788e+06
M50/1793	8.5961	2.965e-05	0.00021065	1103P - own; 3309C - own; so4 - own	115531	133385	290776	310471	153973	170856	101934	122852	98201.7	105188	38833.5	45414.7	81740.1	90307.2	38839.6	35031.5	74354	71800.4	700641	533897	356088	376844	209504	205433	79222.2	78487.8	47957.2	59125	269190	266210	381771	344806	37900	39532.1	79400.9	77691.3	132656	122734	5212.25	2207.67	646364	621240	327404	338003	741961
M62/1793	7.0355	0.00020031	0.00087631	1103P - own; 3309C - own; so4 - own	52592.2	59683.8	111031	85393.5	72471.8	69266.1	47645.8	62726.8	46422.7	61104.7	26618.1	25016.8	39014.2	37381.5	22953.9	51041.6	34410.4	38151.8	169498	141775	116027	124408	53158.9	48752.4	29032.7	34012.5	66121	81139.4	102172	98176.5	141568	122853	59330.8	60236.2	60153	35149.6	49502	51362.4	3196.56	2063.69	203245	193252	113220	111808	222933
M63/1793	9.614	8.7323e-06	9.036e-05	1103P - own; 3309C - own; so4 - own	27524.8	35320.5	79017.6	78068.8	33239.4	44291.7	15942.8	34122.4	22404	26690.9	3744.97	9425.8	19849	24338.6	4693.05	3394.18	20516	20020.9	162589	134489	91292.4	99766.8	54827.2	56010	21326.1	15530.3	4876.99	6678.02	73096.5	71898.8	97697.4	88939	2544.26	1306.87	17066.9	11026.5	34982.8	34068.4	0	0	156881	150834	85793.7	82515.9	174843
M118/1793	8.9261	1.9908e-05	0.00016338	1103P - own; 3309C - own; so4 - own	41639.2	41609.9	98055.4	105187	51831.4	58140	37150.8	37315.4	33530.8	37696.9	13109.3	13624.7	26088.8	29004.5	10523.9	8718.19	26067.1	21836.4	204701	167759	115306	116045	66570.4	70173.1	25695.8	26585	16768.8	17179.8	93127.7	91187.6	126972	114069	11148.4	12500.5	23933.9	25393.5	45996.9	42298.6	1682.76	364.62	207975	202433	109870	112558	236413
M66/1793	8.7071	2.5926e-05	0.0001932	1103P - own; 3309C - own; so4 - own	94361.4	100877	208438	229272	116985	128483	77875	89050	73388.7	83601.5	34487.8	35653.9	62553.4	65311.3	30509.4	24119.8	56024.2	54972.6	482342	374050	253247	268744	154252	146566	51878.1	61499.8	31477.7	42761.7	201947	197999	276947	249729	30470.1	31630.2	60752.2	59443.8	99287.1	97232.9	5727.1	1247.47	443073	434816	237740	243940	506735
M51/1793	8.8943	2.0685e-05	0.00016689	1103P - own; 3309C - own; so4 - own	45560	47348	103387	112953	56789.1	60346.5	38253.8	43480.5	33889	39173.3	13892.7	18366.8	29493.8	34571.9	14111.4	12656.8	25333.2	21205.2	246783	179255	128408	130029	69539.8	77310	24194.9	29542.4	16081.3	19262.8	98486	98981.9	140769	125378	16243.1	15037.5	25862.7	26232.2	43491.2	46964.9	1851.1	815.034	228243	218859	120030	123253	254970
M92/1793	8.8393	2.2102e-05	0.00017535	1103P - own; 3309C - own; so4 - own	159705	166643	366688	391083	201767	218670	130148	146913	132322	138757	55812.9	56442.7	102901	110313	49619.2	45997	98967.1	94395.8	843409	645243	435126	472826	260561	263920	101645	102198	63520.2	74421	345568	339914	479248	431194	58214.8	53106	103226	104231	170930	159563	9771.95	3194.73	785740	756823	411767	421052	891859
M165/1793	8.9974	1.8272e-05	0.00015531	1103P - own; 3309C - own; so4 - own	529262	568355	1.21649e+06	1.28419e+06	654702	719134	452291	519852	422250	461715	184112	208010	351278	383159	155552	159581	258438	288209	2.34376e+06	2.1548e+06	1.43353e+06	1.56553e+06	780760	877395	316413	307026	195087	238046	1.15035e+06	1.12746e+06	1.58785e+06	1.42248e+06	186669	170326	336596	331738	567514	537083	31457.1	13215.8	2.59761e+06	2.51293e+06	1.3456e+06	1.39425e+06	2.94562e+06
M93/1793	8.7675	2.4102e-05	0.00018504	1103P - own; 3309C - own; so4 - own	27603.1	31822.4	63558.8	73613.8	36093.7	37216	22657.1	30871.8	21250.3	24613.1	2583.19	11058.1	18075.3	19327.7	9762.7	7623.49	19082.2	16431.7	159842	120894	83453.4	87956	49751.7	49205.7	18456.8	19394.3	12042	14147	63907.2	62626.7	84515.2	80544.5	9593.28	8121.66	18580.6	14143.5	29545.4	28372.3	684.493	372.568	146384	141833	74740.8	77897.3	168259
M164/1793	7.384	0.00013027	0.00065964	1103P - own; 3309C - own; 3309C - so4; so4 - own	5.39213e+06	5.71601e+06	41956.8	9.53959e+06	6.64177e+06	6.46866e+06	4.57615e+06	4.9007e+06	4.33085e+06	4.31426e+06	1.93961e+06	1.97673e+06	3.56838e+06	2.57633e+06	1.54776e+06	1.56724e+06	2.70374e+06	3.13398e+06	2.49205e+07	1.87662e+07	1.30097e+07	1.28571e+07	7.39698e+06	3.97675e+06	2.40319e+06	51721	1.88882e+06	2.32768e+06	1.17058e+07	6.76735e+06	29213.9	5.74727e+06	1.90348e+06	1.7808e+06	3.42946e+06	3.40549e+06	5.77162e+06	5.51432e+06	342723	122410	2.09613e+07	2.18311e+07	9.32797e+06	1.14758e+07	2.5736e+07
M91/1793	8.6919	2.6406e-05	0.00019337	1103P - own; 3309C - own; so4 - own	589505	624520	1.36323e+06	1.45628e+06	730018	806861	496804	592543	477575	514266	212487	230273	391064	455985	196915	179992	359773	347059	3.18559e+06	2.44158e+06	1.63656e+06	1.76641e+06	993913	979352	382010	379173	240491	289294	1.28245e+06	1.25671e+06	1.77994e+06	1.60538e+06	200240	195302	375750	375658	632798	611369	39902.8	10790.4	2.94233e+06	2.85361e+06	1.53609e+06	1.57277e+06	3.3486e+06
M41/1793	8.2644	4.4338e-05	0.00029313	1103P - own; 3309C - own; so4 - own	33399.2	36277.8	73110.3	76856.6	45119.3	46070.9	31956.9	37068.9	30754.1	30844.9	15756.6	17268.8	22000.1	24612.8	12658.6	11121.1	20385.3	19772.8	161953	128968	95930.9	91107	52297.4	49930.5	21742.1	23370.2	18187.5	24640.1	69125.5	67037	94007.3	87525.2	15974.9	12829.3	24678.9	22108.5	35841.2	34813.8	1150.17	431.324	155467	150027	82266	88304.8	170823
M87/1810	4.0699	0.0084013	0.017617	own - 1103P; own - 3309C	174383	151467	107334	119229	156189	113536	155362	264162	272293	309517	280556	326510	227217	340197	180781	208990	277972	249067	104131	117035	116896	136480	165433	142293	140318	172362	211598	218290	186422	159053	66911.5	82591.9	238266	294254	249572	213627	145575	138701	14346.4	3201.09	80890.3	86535.3	161780	138866	81049.1
M43/1823	4.1835	0.0072677	0.015654	1103P - own; 3309C - own; 3309C - so4	417137	442231	830869	897551	543592	584434	408559	466096	333989	358522	297558	312204	284099	316713	355014	329199	320131	312354	2.2016e+06	1.76881e+06	1.3039e+06	1.37734e+06	515845	516709	418618	409912	245751	289417	542302	540546	1.2689e+06	1.16226e+06	217095	206677	308723	316020	404830	390264	41324.8	17044.8	6.86704e+06	6.74172e+06	658222	679113	5.25336e+06
M77/1823	4.6453	0.004035	0.0094614	3309C - own; 3309C - so4	1.17719e+06	1.24177e+06	2.45456e+06	2.36609e+06	1.54676e+06	1.54679e+06	1.10693e+06	1.26303e+06	902594	818013	802803	655260	770620	635782	1.21869e+06	795911	787213	778005	5.70602e+06	3.22778e+06	1.10507e+06	3.41474e+06	997180	1.48436e+06	914607	1.11115e+06	411078	577488	1.55923e+06	1.56466e+06	3.77152e+06	3.43742e+06	595389	535438	856564	814998	1.16517e+06	1.07463e+06	71488.9	26678.9	4.81779e+06	1.8687e+07	1.69553e+06	1.89855e+06	1.46263e+07
M105/1823	4.794	0.0033398	0.0081525	1103P - own; 3309C - own; 3309C - so4	155195	178655	305096	343724	189283	202943	141959	186643	113139	144870	115396	154652	111599	151670	121537	140634	126384	117571	793273	637720	471478	496975	187507	197065	162616	164532	84116.2	121853	184147	202611	433804	410038	66502.1	63759.9	106009	121386	136469	142044	6639.01	2944.37	2.61617e+06	2.58969e+06	243895	254307	1.97153e+06
M104/1823	5.2678	0.0018317	0.0048438	1103P - own; 3309C - own; 3309C - so4	117993	95721	154574	173583	114099	94396.2	59006.5	83682.1	96612.2	83370.1	103096	65737.8	87371.8	71530	61225	67466.4	65350.5	63338.3	327257	290624	224363	215907	91395.5	102056	66464.1	97354.2	40997.6	56434.3	152798	99768.4	287698	249941	47580.1	64221.2	71565.7	54303.7	75975.3	68463.2	4442.12	1882.57	1.2085e+06	1.20428e+06	110763	114595	932369
M65/1824	3.8183	0.011586	0.023978	1103P - own; 3309C - own; 3309C - so4	72395.4	65332.2	144442	148877	89235.3	100517	63266.2	62331.9	52785.4	45567.9	51747.3	47667.5	46981.4	47261.7	63518.7	57091.6	55921.7	53449.7	369117	274477	195101	213294	66899.7	79605.9	51259.9	58006.3	36846.7	47511.1	96552.7	80062.6	222791	179471	27343.7	25217.7	61693.6	50590.5	65040.7	61558.6	2550.7	1052.54	1.32584e+06	1.30691e+06	110159	110402	996957
M60/1851	4.4343	0.0052783	0.011658	own - 1103P; own - 3309C; own - so4	1.05484e+06	1.08521e+06	976964	1.12219e+06	1.05092e+06	1.0284e+06	679694	806673	1.47192e+06	1.51737e+06	1.67637e+06	1.86545e+06	1.12904e+06	1.03253e+06	1.41163e+06	1.54515e+06	1.18477e+06	933384	1.09473e+06	1.36113e+06	1.1551e+06	1.00367e+06	711036	717999	728714	876591	1.12877e+06	1.05545e+06	729945	750946	983118	1.30069e+06	914387	937354	1.07713e+06	812063	913009	801491	46162.5	6507.52	1.03734e+06	1.02608e+06	1.04946e+06	960543	857522
M138/1867	5.4991	0.0013675	0.0037627	1103P - own; 3309C - own; so4 - own	27208.6	43176.6	108414	149433	48517.7	117247	23817.8	28613.8	20996.4	28642.6	10324.4	10717.4	42600	15651.2	6855.81	7442.63	33676.2	19508.3	197601	267103	209086	177421	8955.04	56247.8	24740.8	7670.42	43851.2	22971.7	38586.9	47111.5	133403	239142	11543.1	9309.65	37302.7	20165.1	72240.7	46746	0	0	97394.3	99453.7	110224	82740	118018
M107/1891	9.3549	1.1899e-05	0.00011106	1103P - own; 3309C - own; so4 - own	66294.8	73467.5	82940.5	90066.1	50528.9	43302.6	29044.4	36416.9	47702	46702.9	39607.8	21828.7	18473	31320.6	16440.1	18590.3	38695.2	42972.2	131263	80259.8	79202.4	94179.9	28123.1	27133.4	30029.2	19156.2	16489.8	26131.4	55452.1	52446.7	122288	105921	53911.2	49263.7	45869	19777.3	31642.8	32454	16018.2	259.084	154962	156653	58302	63577.2	111632
M60/1958	5.8127	0.00092125	0.0029125	1103P - own; 3309C - own	82438.7	69788.2	115410	121743	132391	87657.3	62503.2	71338.6	88748.1	90200.5	47466.3	50484.4	38049.4	53194	28881.1	27949.6	37208.5	36407.7	213988	146328	91100.8	106180	56868.1	55930.3	36709	42578.7	26350.3	36221	75041.7	72916.1	124620	101335	24216	27627.7	34800.7	34767.8	40198.5	45578	2668.34	846.141	459024	428311	78710.3	70693.1	312996
M85/2034	7.3553	0.00013495	0.00067571	1103P - own; 3309C - own; so4 - own	253629	267469	434333	467300	322719	287718	247884	273274	291809	347194	149353	156812	177413	184850	134960	126000	179072	186389	996303	775673	511696	547024	249721	248703	199679	184500	196329	235564	322519	342303	563913	572852	132894	140894	159783	159472	193278	174964	23570.1	8780.25	1.22392e+06	1.26706e+06	375560	381806	1.10431e+06
M213/2053	5.6194	0.0011751	0.0034106	1103P - own; 3309C - own; so4 - own	745359	1.62877e+06	2.03017e+06	2.86568e+06	1.73113e+06	2.40244e+06	874352	1.30419e+06	750663	949184	635640	772247	862903	853939	364187	478061	773013	923045	2.47189e+06	3.84478e+06	2.67685e+06	2.37016e+06	1.80313e+06	1.96494e+06	1.2841e+06	1.20954e+06	736882	598718	1.15254e+06	1.50836e+06	2.62856e+06	4.70508e+06	908770	1.0666e+06	894129	1.10169e+06	1.43027e+06	1.16741e+06	9314.55	18828	1.32928e+06	1.7166e+06	2.65892e+06	2.65423e+06	1.5207e+06
M171/2053	5.5217	0.0013291	0.0036782	1103P - own; 3309C - own; so4 - own	63361.6	135558	168350	239058	151637	206690	78453.1	110709	66612.6	88146.5	51852.9	70649.5	68883.4	86926.7	40076	34979.6	72237.9	76805.4	227924	321147	266734	198647	160353	161970	107806	104742	69052.6	57044.8	91247.6	119422	214615	382914	69904	87342	69112.8	91122.1	115523	95085.4	495.968	244.573	110082	147798	220048	222301	125169
M214/2053	5.6339	0.0011538	0.0033692	1103P - own; 3309C - own; so4 - own	75182.4	165651	206811	294228	179057	256613	85189.7	133938	76519.8	99970.4	65191.3	81733.7	83687.9	97294.3	36913.4	46208.9	87111.1	92930.1	274936	399761	337209	248213	199121	205324	132056	128365	81477.2	66857.8	107465	152206	268720	488711	87647	105009	87040.7	112484	143214	116817	690.781	948.782	133054	175238	275444	275335	153925
M212/2053	5.598	0.0012072	0.0034615	1103P - own; 3309C - own; so4 - own	211852	470167	591723	846002	509832	722018	251505	379069	215778	281489	185179	229362	242099	284355	115873	133512	249501	266898	784182	1.14752e+06	948084	700266	560577	580654	375271	363868	236244	191066	322348	436089	762375	1.40535e+06	255478	308086	248607	317089	406454	326244	1955.55	2496.88	385846	498014	781342	783456	439179
M227/2053	5.6461	0.0011362	0.0033385	1103P - own; 3309C - own; so4 - own	22578.3	46803	64898.1	87993.9	56855.3	77567.2	26722.3	38069.1	21768	30523.1	17639.1	23508.8	23748.6	26107.8	8470.94	14700.3	23358.7	26301.8	86074.6	121920	97152.5	78449.1	52420.1	63341.5	36028.9	36331.6	25035.5	19589.8	35934.7	45971.9	84398.1	154034	25705.4	32051	26887.8	33485.7	44370.6	32339.4	34.143	109.222	40852.6	54609.5	86841.5	83409.6	40716.8
M158/2053	5.7437	0.0010048	0.0030659	1103P - own; 3309C - own; so4 - own	39944.1	91273.8	116928	165872	95409.6	142491	48693.1	75045.8	43017.3	54132.7	32041.7	43537.9	46490.8	50720.5	20458.3	25565.4	47600.4	51405.7	154255	225151	187200	139314	108754	111429	72471.4	71763	46345.8	35699.3	62010.6	84572	147403	277868	49651.9	60361.9	47435.2	61856.4	79333.4	61044.9	177.516	314.497	74088.3	96983.5	150983	152569	85925.2
M143/2053	5.5921	0.0012162	0.0034664	1103P - own; 3309C - own; so4 - own	138255	308446	384276	555079	332442	470242	163308	246537	140750	181820	120259	147202	158627	183791	75003.9	85257.6	163990	172967	513242	756249	621293	458397	367247	378393	239826	233250	154843	122600	211246	284411	501191	928008	169916	201921	164292	208139	267680	217364	1820.38	2469.17	249672	326027	515156	515499	287308
M101/2053	5.6745	0.0010962	0.0032611	1103P - own; 3309C - own; so4 - own	19343.4	46180.9	58981	82127.9	50570.1	61794.2	24872.5	35742.8	18908.6	27565.4	18388.7	21061.7	24219	23563	8009.28	10476.6	22029.7	24434	79054.7	110350	92806.2	62694.5	48456.2	58359.1	0	34248.9	19073.4	14510.2	31847.6	43222.6	76952.4	138370	23396.8	29502.3	20399	30464.8	39129.9	32015.6	89.3579	76.5225	38789.3	49149.3	77969.2	78790.6	40975.7
M89/2053	5.8019	0.00093378	0.0029242	1103P - own; 3309C - own; so4 - own	101655	318081	374124	590249	319256	487778	140579	247762	134577	191001	105330	130058	155588	187261	72505.8	69280.1	148755	178315	551326	794986	666471	439767	385792	397861	233075	244157	157327	119614	148707	275759	466635	877515	152256	204296	156813	208983	229683	201045	556.854	1414.8	235827	347405	501470	544226	295566
M157/2053	5.7271	0.001026	0.0031079	1103P - own; 3309C - own; so4 - own	17419.1	45033	60909.1	88476.3	49136.9	73060.5	19961.1	37438.3	22402.4	28430.4	18421.7	20013	22024.8	29187.1	8711.89	11507	22059.5	27852.9	83035.6	120815	100287	73239.6	58753.6	58979.2	38973.6	37819.6	23155.5	15136	26591.6	44137.5	78904.8	149386	25467.1	30620.4	20340.7	28858.8	42280.5	31985	0	98.1321	37370.9	48800.3	82021.8	82148.4	43474.8
M211/2053	5.6558	0.0011223	0.0033182	1103P - own; 3309C - own; so4 - own	24563.6	66458.7	82780.5	122517	71803.6	101386	28242	52022.6	30154.2	38662	0	25333.6	31655.3	37196.8	13148	16557.3	31489.7	34460.4	113372	166481	137521	100605	78127.6	83006.7	51356.8	50989.4	33158.6	24550.2	38839.5	62457.1	105628	205805	32909.8	41516.7	34399.2	39450.4	54130.3	46025.7	0	53.6387	53267.7	67317	107866	111794	63090.1
M83/2053	4.4999	0.0048554	0.011005	1103P - own; 3309C - own; so4 - own	150355	334380	43672.9	661092	422924	573566	192981	316218	171380	235850	197992	191632	167733	249652	90576.4	93650.3	202640	216825	632234	888804	744680	563317	456255	433124	302502	292106	200844	140574	31901.4	26356.6	509153	1.01297e+06	147613	211621	183674	238036	239694	242327	2600.14	2055.24	294105	381448	601079	603394	371424
M88/2053	3.6674	0.01405	0.028581	1103P - own; 3309C - own; so4 - own	134708	331796	362087	588849	303151	497093	172630	275529	266465	192481	377612	176464	158108	198724	270280	101634	180238	193074	551069	778253	661988	493377	400924	413109	269875	261346	169612	104082	162734	290447	473723	952187	173721	225928	175680	222455	266092	230995	1424.95	2261.84	237076	343234	550609	547882	314806
M102/2053	4.8805	0.0029924	0.0074188	1103P - own; 3309C - own; so4 - own	216354	464160	560802	768251	440107	632648	235181	316567	172114	231739	151902	180803	195224	179778	80254	109703	206104	258166	436283	13931.8	440941	13617.6	340790	440640	244003	219797	155588	130593	325296	427373	725375	1.31066e+06	236738	301610	217063	275211	394488	332336	4074.14	2698.64	379242	469747	605424	691463	385641
M71/2053	5.3962	0.0015571	0.0042354	1103P - own; 3309C - own; so4 - own	101374	211789	254916	351507	218898	305787	116446	164499	107297	129601	82138.1	112926	110684	131980	62097.8	58772.1	109383	120187	334276	464843	394558	295443	242401	251727	162146	158567	102461	90152.2	144223	185185	310651	566463	105003	133831	112756	137535	176944	137376	783.624	1433.99	161572	212194	325289	323458	183497
M70/2053	5.5825	0.001231	0.0034878	1103P - own; 3309C - own; so4 - own	79379.1	201490	254841	392286	228642	336224	102460	156670	85480.4	114766	63465.7	85432.4	110056	130979	58332.5	50861.6	110286	117256	373586	524772	442765	335155	260882	280016	152110	164810	99073.3	91285.4	75001.2	176876	356276	648464	119126	112847	109634	124010	173824	137137	1019.1	1318.09	179757	229271	328061	364915	206268
M57/2053	5.562	0.0012631	0.0035292	1103P - own; 3309C - own; so4 - own	1.41565e+06	3.06644e+06	3.81179e+06	5.38996e+06	3.33335e+06	4.62271e+06	1.66057e+06	2.46505e+06	1.43571e+06	1.83983e+06	1.20959e+06	1.48961e+06	1.60368e+06	1.86658e+06	755138	884941	1.62582e+06	1.72497e+06	4.99812e+06	7.16975e+06	4.66521e+06	4.46609e+06	3.437e+06	3.69373e+06	2.42031e+06	2.36905e+06	1.54684e+06	1.24406e+06	2.1579e+06	2.83245e+06	4.93575e+06	8.7528e+06	1.71277e+06	2.02582e+06	1.66019e+06	2.08908e+06	2.67622e+06	2.18817e+06	24616.8	34388	2.50722e+06	3.21478e+06	4.96719e+06	4.99626e+06	2.83701e+06
M69/2053	5.6013	0.0012021	0.0034615	1103P - own; 3309C - own; so4 - own	179427	417361	522543	739613	447882	634186	199659	336599	186038	251412	150167	198814	226754	258179	107050	122100	224946	222734	685864	976900	819568	616909	490824	515398	325052	318272	213681	176755	273940	375995	662175	1.1815e+06	229893	272909	233842	281764	349258	298786	2965.47	2768.35	330994	436873	679490	681677	391165
M185/2054	5.1257	0.0021925	0.0056995	1103P - own; 3309C - own; so4 - own	27200	74830	87491.2	136930	67832.5	100940	31953.6	48785.4	23112.6	40127.6	21707.3	26638.5	25782.9	34743.6	14698.3	18766.7	35528.2	36831.7	123670	172512	137084	108700	82974.2	90134.7	55407.6	55611.6	29854.4	23073.3	30735.9	49424	91236	202750	33689.5	34048.7	25942.5	49639.5	53641.2	49070.4	138.591	239.119	33670	73317.5	115639	108445	66955.6
M111/2054	6.303	0.00049824	0.0017438	1103P - own; 3309C - own; so4 - own	20117.9	48507.2	67460.8	94412	45279.8	82915.4	26637.7	37781.9	17481.4	14228.2	19178.6	13228.2	26139	28562.6	10476.4	10690.4	19862.7	27806.4	79810.7	128848	102198	68381.5	55284.6	58525.9	37083.2	33879.2	21236.1	19025.5	35802.4	49893.5	86461.9	159504	25235.5	34745.8	29074.7	10266.9	46363.5	37118.6	55.3915	87.0328	42198.7	50970.1	72538.4	85908.2	49018.1
M61/2054	4.344	0.0059218	0.01299	1103P - own; 3309C - own; so4 - own	145826	300066	378645	528229	328733	456975	159055	241076	143171	317011	121061	156153	179220	194818	76781.5	100078	166779	182488	487127	694080	585471	440102	353058	373259	229581	236942	150439	122712	221620	278088	486561	850202	205992	200814	177973	205261	276586	223070	1657.42	2371.53	247056	317595	486182	492295	277451
M60/2063	7.2328	0.00015697	0.00073978	own - 1103P; own - 3309C; own - so4	172205	172174	151825	207882	130666	186494	115840	131224	253609	293518	338181	362785	150040	161496	266088	264736	132765	130237	198203	136938	227050	100447	135867	73818.8	125847	143055	164793	196790	102408	93751.9	96429.5	118265	162362	136885	174230	148557	113784	101930	7341.16	6463.82	109220	139961	190643	193340	93956.6
M85/2063	11.937	5.7593e-07	7.615e-06	own - 1103P; own - 3309C; own - so4	1.33138e+06	1.31429e+06	761409	728557	779108	604931	809465	919237	2.06678e+06	2.41474e+06	2.85953e+06	3.06997e+06	1.03066e+06	1.16271e+06	2.24204e+06	2.15926e+06	964557	906225	909412	626506	431178	427706	361879	346340	993284	995203	1.27317e+06	1.64434e+06	565823	550197	415237	470550	1.20368e+06	1.02627e+06	1.22208e+06	1.10517e+06	568795	558257	6661.98	1226.35	636664	644292	1.02391e+06	1.05085e+06	503313
M73/2063	10.145	4.6509e-06	5.1485e-05	own - 1103P; own - 3309C; own - so4	1.00799e+06	1.05345e+06	615409	929383	602965	455163	612507	716810	1.57588e+06	1.86494e+06	2.18979e+06	2.39048e+06	775882	904640	1.74368e+06	1.67714e+06	734741	762272	659522	538817	970742	317202	601977	298269	762623	799721	981984	1.30602e+06	432261	443885	317984	1.42698e+06	949084	835888	1.00392e+06	895638	497137	484197	5274.49	1856.75	499903	542198	819191	850690	378870
M84/2063	8.5636	3.0842e-05	0.00021589	own - 1103P; own - 3309C; own - so4	284420	333293	102878	177566	96683.1	181346	191897	225533	470274	583434	632216	688921	245175	279073	514646	489665	240035	60552.8	165288	250070	216629	166759	151407	124973	246700	244264	309425	384886	107835	89168.5	192185	213130	219101	225545	255014	229376	99127.5	119297	285.751	179.649	152143	213479	176176	262413	93402.8
M45/2063	10.931	1.8478e-06	2.2553e-05	own - 1103P; own - 3309C; own - so4	324796	317541	194115	195704	186364	157459	199188	231584	504634	590475	698308	746472	258767	286464	549725	526099	241922	213805	246696	171650	119430	131148	91479	130756	244305	242913	314022	403590	122421	137350	163501	144979	293735	248833	300435	270105	145627	129359	931.343	160.879	159672	156266	269680	263453	130848
M87/2064	12.387	3.4425e-07	5.1208e-06	own - 1103P; own - 3309C; own - so4	206777	202234	28218.4	32174.7	122195	23057	121916	143184	309599	376480	446318	485086	159859	178154	348979	335555	141617	132804	126023	30963.2	55731.9	85325.2	45813.5	44504.5	143373	139175	186861	241197	84338	81264.7	134825	213750	190661	160266	186705	174628	80704.6	82802.1	982.011	397.735	19541.3	93672	141374	151748	21642.5
M124/2066	7.4843	0.00011514	0.00060896	1103P - own; 3309C - own; so4 - own	20351.9	37244.1	87821.7	112833	47617.2	93012.1	27913.7	34365	16608.1	23824.9	7815.38	4731.83	34045.2	20134.8	2618.38	2777.59	22886.9	11859.9	121432	186908	153422	122833	57178.9	58126	20386.9	19503.2	23279.4	12109.3	34891.9	42604.3	96331	176273	9419.78	11396.7	30182.2	18389.6	65663.3	40952.7	0	0	70586.2	81024.3	95459.7	76958.6	64704.6
M124/2092	4.9505	0.0027378	0.0068978	1103P - own; 3309C - own; so4 - own	39541.6	11850.1	184038	214155	71301	15272	19852.9	28977.1	33420.2	35075.7	25950.1	30752.7	33064.3	33807.1	17049	17254.7	37798.3	49221	196827	195465	166429	136502	66033.2	81486.3	54634.8	58437.7	20001.7	21490.5	72389	84916.2	251552	388697	46327.2	48578.6	48542.7	49301.8	44974.9	49422.2	416.597	441.407	108168	93909.7	164226	172278	98289.6
M88/2092	5.8551	0.00087346	0.0028092	1103P - own; 3309C - own; so4 - own	17828.8	26952	90198.4	111052	26781.9	72775.7	13584.8	15639.3	12445.7	16556.3	8442.02	9657.17	16605.2	13932.4	5558.06	5299.14	18819.3	21008.1	113308	146247	111417	88661.4	44472.3	43200.3	30696.6	27782.4	6551.04	10545.6	17226.2	38486	124446	195167	16759.1	20556.2	17381.8	28686.8	23227.9	20560.3	0	0	51122.1	62204.8	103574	97333.8	77339.8
M101/2092	3.3215	0.021864	0.043544	1103P - own; 3309C - own	46161.5	72923.3	227058	281633	88876.9	195548	39540.1	34659.1	32249	46787.4	133417	38370	40644.4	86956.1	190091	95663	92784	138071	310412	363079	305857	218841	119121	117616	126269	73905.8	49435.6	152576	42644.7	89943.7	289635	509964	24961.3	47549	28790.2	86933.3	53090.5	58889.6	918.351	412.357	118500	168577	264422	259987	193822
M69/2092	5.7507	0.00099593	0.0030585	1103P - own; 3309C - own; so4 - own	31856.8	87787.5	247284	303575	98741.3	186181	47002.2	52108.2	10265.8	36464.1	26638	26830.8	51938.9	39858.3	18442.4	16362.2	51430.5	11421.1	231029	350776	23592.3	248457	100967	95076.2	72499.4	81953.5	23450.4	24934.9	98642.2	118806	348648	535702	48843.4	58524.6	50321.5	80603.7	11440.3	52979.7	742.109	1069.42	109632	171773	264864	257159	200191
M131/2137	6.6591	0.00031956	0.0012169	1103P - own; 3309C - own; so4 - own	42117.1	49534.8	120180	133385	50123	56574.7	66259.9	69309.6	60343.5	65824.5	37678	38928.6	37021.5	40181.5	37818.2	35696.1	36419.6	35584.1	219707	123175	101248	116321	61553.7	64409	40400.3	40382.1	28723.5	36954.6	85738.1	87717.5	109777	97779.4	27102.8	24845.9	38275.9	38515	54125.9	44359.4	407.629	127.162	121722	123776	86664.4	103166	148257
M157/2216	8.9611	1.9087e-05	0.00015939	1103P - own; 3309C - own; so4 - own	33780.2	42295	81701.1	97837.4	57282.2	71817.9	49406.6	65283.7	31853	43055.4	10766	14345.8	29978.8	41144.2	9836.28	8198.03	23328.5	25498.5	186207	107544	98852.6	130048	53723.8	54433.1	26399.1	20112.6	21459.9	29686.9	70986.2	84464.6	122338	104385	12471.3	15417.8	27422.4	30247.6	33187.9	37990.3	435.871	359.626	94283.1	125049	80704.9	86026	165113
M199/2217	8.7055	2.5977e-05	0.0001932	1103P - own; 3309C - own; so4 - own	39287.3	51176.1	101065	117042	72312.6	86908.7	60980.7	79220.3	39567.5	51793.7	13307.1	18349.2	39880.5	51510.8	14219.7	12489.6	26711.4	31608.4	226079	129833	120328	158165	67310.9	65535.3	28985.2	28177.5	24418.9	39879	91327.8	104255	151227	125218	15662.1	24518.5	34379.4	34520.7	43131.6	48401.1	979.292	324.092	116049	153738	102382	105129	200263
M60/2275	9.1481	1.5244e-05	0.00013691	own - 1103P; own - 3309C; own - so4	328733	278471	187057	161357	166885	288215	153414	200087	339614	513160	485115	661122	201610	242995	400495	385474	178018	179588	178961	63335.5	53967.2	61681	243705	62061.8	168837	152147	208557	291130	122443	61969.3	100666	59831.8	118245	56429.6	156843	117416	81364.5	65129.6	1084.2	476.119	77217.4	71317.9	76010	94004	200726
M73/2275	6.5753	0.00035473	0.0013295	own - 1103P; own - 3309C; own - so4	348657	369462	198966	236805	188181	169862	176510	242707	362288	592120	509470	779101	211719	334136	514067	442975	220199	242536	609195	281084	136132	520238	505259	100374	219173	203727	277978	331773	189298	104526	158628	170875	169790	89502.6	215055	165089	130978	112409	11191.6	5549.8	283750	228660	106030	143093	94521.8
M88/2284	4.1728	0.0073668	0.015725	1103P - own; 3309C - own; so4 - own	11359.9	56220.1	62824.9	114902	22870.8	93008.6	16111.2	36598.2	15410.2	26469.1	24957.6	24265.1	30248.9	32190.4	10284.8	9932.13	49183.1	35510.8	140203	169368	5340.55	102231	59458.8	68531.8	40008.9	35009.7	34775.2	22263.2	36326.1	45296.2	107630	188462	30467	35919.6	35219.5	33639.8	57041.7	39539.1	750.568	1205.53	72087.4	106848	97934.3	88152.9	91356.2
M237/2284	4.0845	0.0082458	0.017367	1103P - own; 3309C - own	11312.6	62369.6	70448.2	121809	29088.6	93910.8	14884.6	32564.8	18453.4	34454.7	22749.8	26918.5	27611.6	32962.9	11776.9	11431.6	57126.9	37062.5	155558	192851	152555	112964	69891.9	74528.9	36985.8	39981.1	39067.7	19333.8	27830.3	46777.2	106411	204831	28642.4	32936.1	39608.5	33943.3	57326.7	40828.8	773.271	839.652	76182.3	130179	108303	96470.2	96529.4
M236/2284	4.2115	0.0070121	0.015172	1103P - own; 3309C - own; so4 - own	13838.4	54880.5	60934.1	109402	23075.7	87919.1	16838.6	33425.2	15867.4	31455.2	22062.5	24672.7	28174.3	30621.1	9538.86	10096.8	48655.3	32368.8	130445	167783	132428	95584.6	61309.1	61901.9	37804.4	33619.1	35876.8	21307.6	33303.1	41158.8	98036.3	181104	24620.3	34264.1	34255.1	31893.7	54262.7	38804.6	356.959	639.557	67713.6	118249	92757.8	84667.1	87962.3
M152/2284	4.4325	0.00529	0.011658	1103P - own; 3309C - own; so4 - own	0	58149.6	63798.8	111368	27869.2	92687.3	16493.1	33389.9	19478.5	31958.5	24064.7	26455.7	34564.7	35152.8	11286.1	10778.8	52950	35454.9	142243	179653	139270	104707	66275.5	68511.8	40346.1	35051.5	37388.6	22083.8	34856.1	46199.4	107901	192251	30478.4	36483	35245.3	35501.3	57298.5	40965.8	592.924	1215.09	74030	125019	100499	90270.7	92613.9
M97/2284	3.6877	0.013691	0.02797	1103P - own; 3309C - own	50331.4	180790	184614	378837	92294.4	272199	55941.3	101745	59572.4	127385	84862.1	43544.9	92968.6	114892	59087	44421.3	172875	106814	458887	553909	446248	332859	224226	232439	125740	136458	111006	161402	96575.9	145396	275495	589285	78463.5	93750.4	92351.8	102583	154271	134763	3215.43	5566.54	211053	404564	323429	276859	302359
M194/2284	4.4331	0.0052862	0.011658	1103P - own; 3309C - own; so4 - own	49750	166020	197598	311644	85379.6	232280	51035.5	62930.5	46283.9	106438	72368.5	81587.1	91925.9	93407.1	27646.7	34364.6	119688	80089.5	361924	435186	353603	300934	159690	201102	87746.9	75575.6	114800	53082.9	115024	140995	324578	556334	95519	106435	115788	105804	171964	128108	3658.18	7349.95	207892	342482	288139	237371	248058
M69/2284	4.1192	0.0078884	0.016763	1103P - own; 3309C - own	24897.2	122225	109567	244857	46478	198337	31161.8	27226.9	40486	61298.2	49051.9	64525.8	60186	22491.1	38121.5	29467.5	109675	72324.7	303579	375323	298972	227069	147583	150695	87446.2	86162.1	82433.5	59988.2	25340.9	78100.1	206812	403101	42665.6	64137.3	74666	69846.4	119062	79802.5	1980.59	3700.82	129943	255356	209499	175963	194191
[truncated: 91 more columns]

## Sheet: supplemental table 2
Table S2: List of the metabolic features identified from XCMS online that are significantly different due to irrigation treatments in wines 2017.
Feature	f.value	p.value	FDR	Fisher's LSD	8A2a	8A2b-1	8A3a	8A3b	8B3a	8B3b	8C2a	8C2b	8C3a	8C3b	8D2a	8D2b	8D3a	8D3b	9A2a	9A2b	9A3a	9A3b	9B2a	9B2b	9B3a	9B3b	9C2a	9C2b	9C3a	9C3b	9D3a	9D3b	10A2a	10A2b	10A3a	10A3b	10B3a	10B3b	10C2a	10C2b	10C3a	10C3b	10D2a	10D2b	10D3a	10D3b	11A2a	11A2b	11A3a
M237/ 2280	16.989	2.6881e-07	1.454e-06	None - Full; RDI - Full	0	58149.6	63798.8	111368	27869.2	92687.3	16493.1	33389.9	19478.5	31958.5	24064.7	26455.7	34564.7	35152.8	11286.1	10778.8	52950	35454.9	142243	179653	139270	104707	66275.5	68511.8	40346.1	35051.5	37388.6	22083.8	34856.1	46199.4	107901	192251	30478.4	36483	35245.3	35501.3	57298.5	40965.8	592.924	1215.09	74030	125019	100499	90270.7	92613.9
M227/ 2260	17.891	1.3155e-07	9.3139e-07	None - Full; RDI - Full	6959.36	49662.8	22336.7	64518	32076.5	61590.4	10107.3	34384.7	15235.6	36772.9	0	23079.3	25924.9	43479.2	14728.3	18607.1	33072.9	31187.4	64185.8	80112.1	72505.1	52432.3	50072.1	53096.4	32638.9	33016.3	37773.9	31811.2	0	36598.1	0	69655.9	0	39852.8	28555.4	28823.2	49317.3	43935	0	140.12	23035.7	53272.2	49441.8	44903.1	39773.7
M85/ 1390	21.839	6.2895e-09	1.595e-07	None - Full; RDI - Full; None - RDI	10755.2	2166.58	30674.2	54981.5	466.353	81397.8	27313.5	24329.7	510.256	38593.2	46610.7	41373.1	37790.2	1031.14	639.189	51599.2	41374.3	39045.1	44271.3	46095.7	42632.3	49964.7	41751.3	55945.8	26076.2	43850.9	32922.8	61824.4	1371.54	1029.91	1566.7	10490.5	5058.18	821.825	5679.4	9627.87	2071.98	2773.53	0	0	6232.01	1820.99	1578.34	2313.23	9681.25
M194/ 2280	20.334	1.971e-08	3.1273e-07	None - Full; RDI - Full	11312.6	62369.6	70448.2	121809	29088.6	93910.8	14884.6	32564.8	18453.4	34454.7	22749.8	26918.5	27611.6	32962.9	11776.9	11431.6	57126.9	37062.5	155558	192851	152555	112964	69891.9	74528.9	36985.8	39981.1	39067.7	19333.8	27830.3	46777.2	106411	204831	28642.4	32936.1	39608.5	33943.3	57326.7	40828.8	773.271	839.652	76182.3	130179	108303	96470.2	96529.4
M152/ 2280	15.947	6.1969e-07	2.4178e-06	None - Full; RDI - Full	11359.9	56220.1	62824.9	114902	22870.8	93008.6	16111.2	36598.2	15410.2	26469.1	24957.6	24265.1	30248.9	32190.4	10284.8	9932.13	49183.1	35510.8	140203	169368	5340.55	102231	59458.8	68531.8	40008.9	35009.7	34775.2	22263.2	36326.1	45296.2	107630	188462	30467	35919.6	35219.5	33639.8	57041.7	39539.1	750.568	1205.53	72087.4	106848	97934.3	88152.9	91356.2
M236/ 2280	10.541	5.634e-05	0.00010814	None - Full; RDI - Full	13838.4	54880.5	60934.1	109402	23075.7	87919.1	16838.6	33425.2	15867.4	31455.2	22062.5	24672.7	28174.3	30621.1	9538.86	10096.8	48655.3	32368.8	130445	167783	132428	95584.6	61309.1	61901.9	37804.4	33619.1	35876.8	21307.6	33303.1	41158.8	98036.3	181104	24620.3	34264.1	34255.1	31893.7	54262.7	38804.6	356.959	639.557	67713.6	118249	92757.8	84667.1	87962.3
M47/ 1450	5.8307	0.0037385	0.0052804	Full - None; RDI - None	15113.1	19532	145256	163981	189637	92204.3	85534	97630.4	99641	67156.8	24050.4	22890.3	77520.3	87265.8	30696.7	38053.4	64047.3	50417.6	104752	267095	190430	188597	162138	125770	12029.1	136892	45291.1	74943.2	147941	11420.7	225673	124043	45300.9	83231.8	26140	43367.1	49039	112985	108887	103935	359085	299860	152465	121419	274048
M214/ 2060	15.867	6.6081e-07	2.4964e-06	None - Full; RDI - Full; None - RDI	17419.1	45033	60909.1	88476.3	49136.9	73060.5	19961.1	37438.3	22402.4	28430.4	18421.7	20013	22024.8	29187.1	8711.89	11507	22059.5	27852.9	83035.6	120815	100287	73239.6	58753.6	58979.2	38973.6	37819.6	23155.5	15136	26591.6	44137.5	78904.8	149386	25467.1	30620.4	20340.7	28858.8	42280.5	31985	0	98.1321	37370.9	48800.3	82021.8	82148.4	43474.8
M177/ 1530	16.211	5.0095e-07	2.2079e-06	None - Full; RDI - Full; None - RDI	17639.2	78553.8	24475.5	43735.3	408.166	29750.9	18508.7	69722.8	16331.9	69835.8	36329.3	122787	10866.5	58596.3	42122.1	54440.5	21937.3	37892.9	27310.5	10738.3	8586.33	24187.7	21253.6	30256	22375.8	35693.5	7190.38	28415.2	10746	29187.6	4264.58	7592.75	6816.12	7289.95	19123.1	55323	13593.8	38204	0	0	15103	22768.6	39491.3	67009.5	70964.1
M124/ 2090	13.273	5.5501e-06	1.4358e-05	None - Full; RDI - Full	17828.8	26952	90198.4	111052	26781.9	72775.7	13584.8	15639.3	12445.7	16556.3	8442.02	9657.17	16605.2	13932.4	5558.06	5299.14	18819.3	21008.1	113308	146247	111417	88661.4	44472.3	43200.3	30696.6	27782.4	6551.04	10545.6	17226.2	38486	124446	195167	16759.1	20556.2	17381.8	28686.8	23227.9	20560.3	0	0	51122.1	62204.8	103574	97333.8	77339.8
M98/ 1440	10.251	7.2387e-05	0.0001346	None - Full; RDI - Full	18013	168744	16304.5	13614.4	19649.1	227268	178410	184424	382213	357624	569676	496571	292559	304775	535203	473132	274366	9279.12	113444	158204	17396.4	17607.9	77701.8	98543.8	199956	201767	628135	438930	22167.6	131551	59510.3	14271.7	480092	464077	442834	423059	214862	225616	0	0	21746.7	27344.5	386544	335683	22653.9
M56/ 2260	21.947	5.7958e-09	1.595e-07	None - Full; RDI - Full; None - RDI	18373	133386	75612.9	160131	96143	171761	33415.3	102454	46044.5	106907	55520	59533.8	77230.5	121554	47477.8	62248.7	105060	89100.9	172493	211404	195562	147202	142051	147251	91843.5	97773.2	108951	95723	55965.9	107072	105438	198363	103601	121070	94992.8	96740.3	139314	115512	1069.22	1244.76	74574.4	150036	144465	133804	111479
M185/ 2260	23.144	2.3718e-09	1.129e-07	None - Full; RDI - Full; None - RDI	19023.4	105700	64271.2	140758	75694.4	130859	30953.3	78186.5	40067.9	76592	43942.2	42358.2	56694.2	99950.2	31296.6	43119.3	79853.4	67659	136803	173114	155063	113068	91957.1	109700	74875.2	69503.6	85746.7	65806.6	56034.2	84770.5	93799.1	162252	83054.3	97868.7	80586.5	75600.7	112981	95763.7	1072.16	965.492	60155.4	117064	115833	105607	85489.4
M212/ 2060	14.007	3.0185e-06	8.5019e-06	None - Full; RDI - Full; None - RDI	19343.4	46180.9	58981	82127.9	50570.1	61794.2	24872.5	35742.8	18908.6	27565.4	18388.7	21061.7	24219	23563	8009.28	10476.6	22029.7	24434	79054.7	110350	92806.2	62694.5	48456.2	58359.1	0	34248.9	19073.4	14510.2	31847.6	43222.6	76952.4	138370	23396.8	29502.3	20399	30464.8	39129.9	32015.6	89.3579	76.5225	38789.3	49149.3	77969.2	78790.6	40975.7
M185/ 2060	15.02	1.3143e-06	4.437e-06	None - Full; RDI - Full	20117.9	48507.2	67460.8	94412	45279.8	82915.4	26637.7	37781.9	17481.4	14228.2	19178.6	13228.2	26139	28562.6	10476.4	10690.4	19862.7	27806.4	79810.7	128848	102198	68381.5	55284.6	58525.9	37083.2	33879.2	21236.1	19025.5	35802.4	49893.5	86461.9	159504	25235.5	34745.8	29074.7	10266.9	46363.5	37118.6	55.3915	87.0328	42198.7	50970.1	72538.4	85908.2	49018.1
M124/ 2060	16.513	3.9314e-07	1.9095e-06	None - Full; RDI - Full; None - RDI	20351.9	37244.1	87821.7	112833	47617.2	93012.1	27913.7	34365	16608.1	23824.9	7815.38	4731.83	34045.2	20134.8	2618.38	2777.59	22886.9	11859.9	121432	186908	153422	122833	57178.9	58126	20386.9	19503.2	23279.4	12109.3	34891.9	42604.3	96331	176273	9419.78	11396.7	30182.2	18389.6	65663.3	40952.7	0	0	70586.2	81024.3	95459.7	76958.6	64704.6
M85/ 2260	22.206	4.7734e-09	1.5147e-07	None - Full; RDI - Full	20995.1	126445	63173.7	151762	89830.1	154368	37781.3	106068	53551.3	101164	54295.4	72203.3	71342.6	122794	51163.7	58091.7	97750.7	87435.4	165368	203407	182744	141089	134583	138109	86804	88452.2	106216	85497.6	67946.5	95236.3	107738	187830	94286	112176	94954.5	90203	126138	115761	559.849	1555.01	68503.7	133024	131480	120494	107132
M85/ 1440	14.347	2.2804e-06	6.7841e-06	None - Full; RDI - Full	21380.6	85525.6	57988.8	67984.9	83728.7	102297	84562.8	79647.2	168619	149003	238391	203226	142710	129792	221516	199914	121326	95145	62700.4	86356.6	56028.1	51921.3	51094.5	40648.6	90711.5	99994.1	250149	185275	75961.5	76329.3	37227.2	18422.7	208050	199591	192434	178978	103656	95438.7	36.3054	0	24933.7	18196.9	157309	155063	33741.5
M158/ 2060	15.738	7.3318e-07	2.748e-06	None - Full; RDI - Full	22578.3	46803	64898.1	87993.9	56855.3	77567.2	26722.3	38069.1	21768	30523.1	17639.1	23508.8	23748.6	26107.8	8470.94	14700.3	23358.7	26301.8	86074.6	121920	97152.5	78449.1	52420.1	63341.5	36028.9	36331.6	25035.5	19589.8	35934.7	45971.9	84398.1	154034	25705.4	32051	26887.8	33485.7	44370.6	32339.4	34.143	109.222	40852.6	54609.5	86841.5	83409.6	40716.8
M88/ 2470	9.9734	9.2088e-05	0.00016667	None - Full; RDI - Full	23294.6	151921	44102.9	180956	56428.8	166903	33665.4	107707	44236.7	127929	59768.2	130407	48971.4	171084	186828	172645	160498	184296	130114	121506	131552	95143.1	235274	22014.6	128318	191377	132531	133359	69047	122796	60796.6	113391	173132	197792	122012	175449	149136	146871	5365.65	3574.52	43559.9	95382.5	73813	74304.5	133466
M84/ 1850	22.21	4.7576e-09	1.5147e-07	None - Full; RDI - Full; None - RDI	23681	31741.3	146484	272460	26407.6	278815	18203.7	123656	129125	153694	153110	165517	223470	144280	17374	110764	199467	17676.8	248003	375261	356938	267009	150607	163062	123660	105013	225501	134977	46407	68107.5	172485	338366	44500.9	48366.4	163442	71931.7	168809	32137.5	570.984	178.479	125274	139283	200145	134133	120614
M227/ 2060	16.053	5.6879e-07	2.3141e-06	None - Full; RDI - Full	24563.6	66458.7	82780.5	122517	71803.6	101386	28242	52022.6	30154.2	38662	0	25333.6	31655.3	37196.8	13148	16557.3	31489.7	34460.4	113372	166481	137521	100605	78127.6	83006.7	51356.8	50989.4	33158.6	24550.2	38839.5	62457.1	105628	205805	32909.8	41516.7	34399.2	39450.4	54130.3	46025.7	0	53.6387	53267.7	67317	107866	111794	63090.1
M97/ 2280	18.734	6.7922e-08	6.5981e-07	None - Full; RDI - Full	24897.2	122225	109567	244857	46478	198337	31161.8	27226.9	40486	61298.2	49051.9	64525.8	60186	22491.1	38121.5	29467.5	109675	72324.7	303579	375323	298972	227069	147583	150695	87446.2	86162.1	82433.5	59988.2	25340.9	78100.1	206812	403101	42665.6	64137.3	74666	69846.4	119062	79802.5	1980.59	3700.82	129943	255356	209499	175963	194191
M163/ 1540	11.357	2.7949e-05	6.1026e-05	None - Full; RDI - Full	26935.3	110276	46187	174384	42070.9	137143	45286.1	163131	45667.8	107360	41229.8	67784	40743.1	141387	69712.7	66708.9	63811.1	68186.8	191918	112509	139983	191877	104069	97947.8	85246.2	98771.5	130748	199519	71151.5	82419.6	101950	88133.8	24354.6	37429.2	28031.1	32777.8	55455.1	61242	121.389	0	152577	201963	152080	184866	228289
M111/ 2060	18.187	1.0419e-07	8.2471e-07	None - Full; RDI - Full; None - RDI	27200	74830	87491.2	136930	67832.5	100940	31953.6	48785.4	23112.6	40127.6	21707.3	26638.5	25782.9	34743.6	14698.3	18766.7	35528.2	36831.7	123670	172512	137084	108700	82974.2	90134.7	55407.6	55611.6	29854.4	23073.3	30735.9	49424	91236	202750	33689.5	34048.7	25942.5	49639.5	53641.2	49070.4	138.591	239.119	33670	73317.5	115639	108445	66955.6
M138/ 1870	14.804	1.567e-06	5.0978e-06	None - Full; RDI - Full; None - RDI	27208.6	43176.6	108414	149433	48517.7	117247	23817.8	28613.8	20996.4	28642.6	10324.4	10717.4	42600	15651.2	6855.81	7442.63	33676.2	19508.3	197601	267103	209086	177421	8955.04	56247.8	24740.8	7670.42	43851.2	22971.7	38586.9	47111.5	133403	239142	11543.1	9309.65	37302.7	20165.1	72240.7	46746	0	0	97394.3	99453.7	110224	82740	118018
M45/ 1790	13.843	3.4568e-06	9.6224e-06	None - Full; RDI - Full	27524.8	35320.5	79017.6	78068.8	33239.4	44291.7	15942.8	34122.4	22404	26690.9	3744.97	9425.8	19849	24338.6	4693.05	3394.18	20516	20020.9	162589	134489	91292.4	99766.8	54827.2	56010	21326.1	15530.3	4876.99	6678.02	73096.5	71898.8	97697.4	88939	2544.26	1306.87	17066.9	11026.5	34982.8	34068.4	0	0	156881	150834	85793.7	82515.9	174843
M66/ 1790	11.907	1.7501e-05	3.9859e-05	None - Full; RDI - Full	27603.1	31822.4	63558.8	73613.8	36093.7	37216	22657.1	30871.8	21250.3	24613.1	2583.19	11058.1	18075.3	19327.7	9762.7	7623.49	19082.2	16431.7	159842	120894	83453.4	87956	49751.7	49205.7	18456.8	19394.3	12042	14147	63907.2	62626.7	84515.2	80544.5	9593.28	8121.66	18580.6	14143.5	29545.4	28372.3	684.493	372.568	146384	141833	74740.8	77897.3	168259
M102/ 2260	18.945	5.7599e-08	6.0311e-07	None - Full; RDI - Full	28263.5	146462	90362.5	188818	96715.9	186260	47072.5	119698	4032.72	114134	62836.6	79908.2	88536.8	139897	52221.8	63048.5	113253	95305.2	192634	239663	216439	160581	155395	166123	103749	105470	123664	101431	83490.1	117171	128798	221666	110226	141192	111571	105511	156995	133882	369.324	1546.52	81320.6	160112	158685	143900	125862
M192/ 1530	13.751	3.7312e-06	1.0207e-05	None - Full; RDI - Full; None - RDI	28756.5	129149	14334.3	61010.8	548.937	44541.9	34075.8	90398.1	24184.4	105389	56004.1	175466	18864.7	116292	59143.4	87790.5	35363.8	55616.5	47009.7	13409.2	11267.5	31666.9	31917.5	39223.6	33930.8	48631.7	12026.8	55616.5	17951.9	46838.2	10548.6	12778.7	10711.3	11770.1	37543.2	87696.3	29214.4	56948	0	0	27421.3	42391.3	62007.4	109211	109429
M118/ 1790	10.389	6.42e-05	0.00012175	None - Full; RDI - Full	29599	32185	64118	59824.2	32782.8	45507.5	20158.1	29237.6	20299.2	26033.5	9758.04	12771.3	17998.1	19037	9149.64	8549.5	18511	13714.8	149327	112115	86992.4	93023.4	46419.6	44459.2	16344.6	18329.7	7391.65	11148.3	64956.8	65989.6	97798.5	83492.3	13024.6	6779.88	21737	19815.3	31759.7	32626.2	986.391	218.652	142936	142303	73373.6	76272.1	163433
M97/ 2260	25.657	3.7721e-10	6.196e-08	None - Full; RDI - Full; None - RDI	30683	215558	129912	289925	144033	240562	50432.3	179456	77408.3	168960	89307.2	124393	118830	216179	79053.7	98778.9	175361	145253	294171	366023	313199	239027	236434	238213	150868	153119	181049	151442	59689.1	151751	118923	328277	144037	189162	163981	149155	221794	168408	2076.1	2377.87	124608	253698	196941	216026	204716
M85/ 2300	18.93	5.8284e-08	6.0311e-07	None - Full; RDI - Full; None - RDI	31797	131039	11308.6	112092	22659.6	72899.4	51477.7	146941	38403.9	170006	58752.7	188085	37294.6	130412	216929	157896	150038	233505	39374.4	69618.2	32817.8	79263.8	125474	105245	149905	138187	75139.1	109279	107023	4439.54	1350.8	76741.2	6765.79	2505.96	17499.8	13072.6	21763.6	4456.09	152.156	0	1649.25	43583.9	1512.42	1370.54	38457.6
M88/ 2090	8.5896	0.00031017	0.0005039	None - Full; RDI - Full	31856.8	87787.5	247284	303575	98741.3	186181	47002.2	52108.2	10265.8	36464.1	26638	26830.8	51938.9	39858.3	18442.4	16362.2	51430.5	11421.1	231029	350776	23592.3	248457	100967	95076.2	72499.4	81953.5	23450.4	24934.9	98642.2	118806	348648	535702	48843.4	58524.6	50321.5	80603.7	11440.3	52979.7	742.109	1069.42	109632	171773	264864	257159	200191
M158/ 1850	17.275	2.1412e-07	1.2133e-06	None - Full; RDI - Full; None - RDI	33127.5	57137.6	72799.2	102893	74148.7	93198.4	29910.5	39489.4	49180.9	55405.4	52238.5	50150.7	78183.7	43080.1	31523.9	36518	59275.7	41195.8	70171.7	128794	106438	86479.2	30935.4	54110.9	37932.1	34570.2	70342.2	33695.7	33944	38938.9	81222.1	140814	24953.7	25288.4	57004.2	32227.3	69095.4	49167.4	0	0	48003.4	51063.7	73936.5	52957.9	44066.4
M93/ 1790	12.246	1.3135e-05	3.1289e-05	None - Full; RDI - Full	33399.2	36277.8	73110.3	76856.6	45119.3	46070.9	31956.9	37068.9	30754.1	30844.9	15756.6	17268.8	22000.1	24612.8	12658.6	11121.1	20385.3	19772.8	161953	128968	95930.9	91107	52297.4	49930.5	21742.1	23370.2	18187.5	24640.1	69125.5	67037	94007.3	87525.2	15974.9	12829.3	24678.9	22108.5	35841.2	34813.8	1150.17	431.324	155467	150027	82266	88304.8	170823
M157/ 2220	14.863	1.4939e-06	4.9381e-06	None - Full; RDI - Full	33780.2	42295	81701.1	97837.4	57282.2	71817.9	49406.6	65283.7	31853	43055.4	10766	14345.8	29978.8	41144.2	9836.28	8198.03	23328.5	25498.5	186207	107544	98852.6	130048	53723.8	54433.1	26399.1	20112.6	21459.9	29686.9	70986.2	84464.6	122338	104385	12471.3	15417.8	27422.4	30247.6	33187.9	37990.3	435.871	359.626	94283.1	125049	80704.9	86026	165113
M161/ 1760	14.236	2.4987e-06	7.2967e-06	None - Full; RDI - Full; None - RDI	34023.4	51914.1	169148	203928	88737.7	167177	31918.1	31214.9	52053.1	49581.6	40783.5	18938.2	95144.4	20549.3	7940.8	5045.32	106919	29291.8	193573	510612	341837	214001	69392.6	73092.1	17735.6	16681.3	124421	36340.4	102575	94521.2	134799	359896	9404.33	11731.2	209730	37690.1	232310	125516	0	0	212822	194276	143317	84458.7	138960
M109/ 1850	18.509	8.0982e-08	7.2692e-07	None - Full; RDI - Full; None - RDI	34135.6	58878.9	67916	42075.2	70190.7	104526	17387	41804.6	45667.6	48307.9	50252.5	52726.2	75454.5	41798.4	33386.6	42202.7	61220.6	42186.3	85986	124533	142040	95624.7	34466	57459.5	36022.1	32307.8	78665.8	42412.1	19152.1	33372.9	61469.8	148414	22418.3	22080.3	46779.6	23126.9	67534.6	13642.8	48.7141	0	45796.9	47211.5	79687.7	65009	53509.6
M143/ 2260	24.658	7.7864e-10	6.196e-08	None - Full; RDI - Full	34188	190434	121797	254012	141849	248412	59717.4	155940	65052.5	146900	76894	108110	105793	182917	67050.8	83626.7	151356	123790	247066	315966	285735	209984	206458	217067	128292	136233	161234	133766	98619.5	156431	160504	294928	143380	180719	144939	136174	206617	179435	1145.98	1822.04	106294	210985	209738	189156	164098
M61/ 1260	10.623	5.2486e-05	0.00010239	None - Full; RDI - Full	35795.6	28897.3	87288.5	83931.9	57399	51318.6	38719.4	43073.3	29672.5	29501.9	26267.4	21461.6	13420.6	2718.71	91484.8	22850.6	31169.9	30359.6	226257	246085	138799	130189	55233	49011.1	25512.1	36640.3	18940.4	24428.9	55701.4	54814.5	160236	140814	24801.3	23815.3	47775.3	49664.3	35221.3	36118.8	2057.31	1140.58	461869	536781	80650.8	77392.7	472112
M74/ 1390	6.945	0.0013525	0.0020246	None - Full; None - RDI	36627.3	19478.7	21260.6	16669.3	23416	25245.7	31628.1	31447	71372.5	9677.53	107185	93135.2	7275.03	47443.2	25721.3	89005.1	17058.9	37102.6	13417.3	1246.53	10106.6	8061.53	268.712	735.961	19680.6	32421.7	85436	484.128	33252.7	30096.8	10552.7	12033.1	90881.2	90629.1	76035.9	77210.4	31690.4	34437.8	0	0	10552.5	17508.1	70975.9	63989.1	10857.8
M113/ 2100	15.985	6.0084e-07	2.4034e-06	None - Full; RDI - Full; None - RDI	36864.4	43474.8	31511.7	47807.4	19571.5	33543.3	51968.1	63852.9	26294.5	65650.8	102371	71896.7	49831.2	61363.2	145870	75893.7	66923.3	102871	59599.2	19275.6	31771.1	64142.9	96030.7	80233.7	98092.4	96332	33849.3	111245	117374	3794.57	2900.09	3262.12	4332.63	4224.65	6483.63	5050.27	1854.76	1110.35	0	0	1139.51	1191.93	639.945	669.022	425.687
M45/ 2260	11.755	1.9902e-05	4.4477e-05	None - Full; RDI - Full; None - RDI	38172.5	115176	90989	138485	97470.9	142913	55501.1	90066.9	57341	94599.2	73236.3	76589.2	81362.1	118185	57493.9	62177	100989	85823.5	145149	171157	148565	122219	124878	125314	84947	94393	94879.6	85517.8	82969.6	101310	129425	171553	100158	114674	98123.4	89506.6	122857	110858	10458.9	13559	76399.3	131921	123961	109738	104406
M72/ 1640	15.895	6.4605e-07	2.4643e-06	None - Full; RDI - Full; None - RDI	38809.6	46108.9	27988.3	37640.1	48349.8	74704	28842.6	28714.2	59540.7	60394.7	75576.5	56691	86393.6	40133.9	54263.1	49932.2	62396.5	32817.8	31480.6	34984.5	37333.7	38492	23021.9	21192.4	31171.8	31069.9	135927	70703.1	18155.9	20040.1	18793	33371.9	40642.7	42127	66081.7	34077.2	65515.4	42444.4	431.471	315.576	18542	17930.9	40466.8	33948.4	13971.1
M199/ 2220	14.296	2.378e-06	7.0305e-06	None - Full; RDI - Full	39287.3	51176.1	101065	117042	72312.6	86908.7	60980.7	79220.3	39567.5	51793.7	13307.1	18349.2	39880.5	51510.8	14219.7	12489.6	26711.4	31608.4	226079	129833	120328	158165	67310.9	65535.3	28985.2	28177.5	24418.9	39879	91327.8	104255	151227	125218	15662.1	24518.5	34379.4	34520.7	43131.6	48401.1	979.292	324.092	116049	153738	102382	105129	200263
M101/ 2090	8.7677	0.00026495	0.00043687	None - Full; RDI - Full	39541.6	11850.1	184038	214155	71301	15272	19852.9	28977.1	33420.2	35075.7	25950.1	30752.7	33064.3	33807.1	17049	17254.7	37798.3	49221	196827	195465	166429	136502	66033.2	81486.3	54634.8	58437.7	20001.7	21490.5	72389	84916.2	251552	388697	46327.2	48578.6	48542.7	49301.8	44974.9	49422.2	416.597	441.407	108168	93909.7	164226	172278	98289.6
M69/ 2260	24.724	7.4217e-10	6.196e-08	None - Full; RDI - Full	39692.1	372380	216862	486161	255845	475623	95093	300506	94679.3	296797	144463	210251	203318	362367	126657	167158	292000	247737	492086	602705	548523	404445	404593	426099	261552	260438	315715	255905	175235	297813	251970	527298	187903	330396	290395	266462	359592	339700	3894.08	3939.39	192267	388512	405875	362709	317364
M136/ 1790	10.649	5.1287e-05	0.00010084	None - Full; RDI - Full	39801.7	42846.4	88401	102752	49642.8	52932.6	30625.4	41734.1	32799.3	29853.6	11029.3	8072.89	25887.1	27374.6	11790.8	13625.1	21402.7	23323	226413	177113	112671	116854	62434.8	68736.7	21728.5	23567.4	14958.2	20096.1	86026	91127.2	125575	116730	14153.4	11870.2	19337.7	25285.1	39113.1	40980.6	1560.02	544.953	214435	193794	101907	111767	248425
M171/ 2060	16.67	3.466e-07	1.779e-06	None - Full; RDI - Full	39944.1	91273.8	116928	165872	95409.6	142491	48693.1	75045.8	43017.3	54132.7	32041.7	43537.9	46490.8	50720.5	20458.3	25565.4	47600.4	51405.7	154255	225151	187200	139314	108754	111429	72471.4	71763	46345.8	35699.3	62010.6	84572	147403	277868	49651.9	60361.9	47435.2	61856.4	79333.4	61044.9	177.516	314.497	74088.3	96983.5	150983	152569	85925.2
M120/ 1260	19.425	3.9689e-08	5.1059e-07	None - Full; RDI - Full; None - RDI	40009.7	43797.7	59668.8	77744	144544	83716.1	51233.1	72842.9	24515.2	34090	3626.99	22314.7	31180.1	57710.5	18946.7	22000.1	23654.8	24599.4	70787	48214.9	57743.2	74157.7	36004.2	39221.9	25189.2	33670.5	67413	90382.1	26976.3	29474.9	36616	35815.5	23860.2	25462	9082.36	12915.2	20433.3	28954.5	87.2127	41.7228	76617.4	88708.5	58951.3	65007.5	75116.5
M112/ 1640	16.235	4.9114e-07	2.1849e-06	None - Full; RDI - Full; None - RDI	40101.1	52614.1	30886.5	40457.6	56376.6	88986.4	6150.59	30516.2	65963.9	65810.9	88789.8	64512.1	104559	43323.7	62482	57149.8	69911.8	37725.8	30308.2	38656.2	43600.8	41220.6	21524.7	22331.6	28072.1	34510.2	167536	84120.5	16249.1	14885.8	17669.8	32418.8	47214.4	47170.3	76506.6	34233.8	70351.6	43868.1	0	0	19488.4	16030.7	45748	38221.1	9141.07
M184/ 1850	18.142	1.079e-07	8.2471e-07	None - Full; RDI - Full; None - RDI	40230.7	73629.8	90758	132238	81431.9	122195	36194.8	49151.7	61462.9	69625.6	66787.4	67975.7	96922.8	53521.2	46014.9	45533	86383.9	49543.8	107954	166921	155311	123428	65209.1	66608.3	47822.5	45680.5	99033.7	60218.7	37820.9	50901.9	95299.6	171403	26721.6	32154.2	72007.1	38428.5	101100	69417.2	0	0	49124.6	63785.2	101947	76971.9	65817
M73/ 1720	15.453	9.2369e-07	3.2569e-06	None - Full; RDI - Full	40307.6	120490	16939	112215	13019.1	108610	58557.9	112378	62059.3	75340.9	33083	88634.7	24230.1	90268	135095	166093	130603	171739	105510	112900	113176	132331	78884.4	130841	122532	151895	116026	34638.2	247948	187591	200025	210438	192824	105798	191188	200755	227728	237816	1100.61	809.701	16335.1	68949.4	47097.6	295850	200937
M85/ 1330	14.082	2.8377e-06	8.1369e-06	None - Full; RDI - Full	40351.8	42890.8	76203.2	77563.1	80851.3	79490.3	43687.9	45585.2	41940.2	43688.1	29170.2	21139.1	40742.1	46400.2	6381.19	14914	41619.5	35789.1	110097	141975	99833	104286	73753.4	69740.3	29047.6	27102	37200.1	22559.3	77542.3	89632.9	120847	105506	40171.8	35655.1	39388	46621.2	68261.2	77705.3	138.013	42.1977	136911	144070	103094	110679	135146
M137/ 1600	20.986	1.1984e-08	2.3758e-07	None - Full; RDI - Full	40525.5	59637.4	90473.3	114969	35845	86601.4	54355.5	75518.4	50470.1	56800.8	25183	32906.7	41475.8	47453.1	67600	53240.3	40137.7	37343	125348	83149.1	77640.5	80620.9	41992.3	35158.6	49533.7	42945.3	61803.5	94088.1	43967	57021.8	53597	55986.9	30599.5	46455.4	12767.5	1031.22	32919	37895.5	170.464	40.5974	83477	98343.7	56062	64101.9	100357
M173/ 1640	14.538	1.9498e-06	6.1465e-06	None - Full; RDI - Full; None - RDI	40931.2	53180.2	25330.4	35556.6	68.7934	78225.7	28842	32488.2	58476.4	51161.6	80600.7	56197.4	109122	43168.8	31860.8	51836.9	64449.8	38201.1	25440.4	32419.7	34437.3	37993.8	18582.8	23293.6	24912	21070.8	158734	65876.6	15897.6	20283	12351.3	30730.6	42712.2	45600.2	84116.5	37022.2	81895.3	46665.8	0	0	14790.5	17170.1	32230.3	33730.4	7736.55
M95/ 1850	21.565	7.7335e-09	1.6732e-07	None - Full; RDI - Full; None - RDI	41159.3	82656	82603.4	182678	123678	167343	39592.9	56948.3	55430	100631	68712.7	95888.3	118049	80600.6	58342.3	27840.4	120191	69307.3	156065	225372	237143	19970.8	56351.8	103279	49324.9	61435.4	139979	24643.8	24538.2	62044	97041.4	249555	28011.4	35119.8	15830.5	16623.4	88647.6	20502.4	93.3076	99.9069	66343.5	80366.8	119689	111087	49708.1
M50/ 1790	11.218	3.147e-05	6.7173e-05	None - Full; RDI - Full	41639.2	41609.9	98055.4	105187	51831.4	58140	37150.8	37315.4	33530.8	37696.9	13109.3	13624.7	26088.8	29004.5	10523.9	8718.19	26067.1	21836.4	204701	167759	115306	116045	66570.4	70173.1	25695.8	26585	16768.8	17179.8	93127.7	91187.6	126972	114069	11148.4	12500.5	23933.9	25393.5	45996.9	42298.6	1682.76	364.62	207975	202433	109870	112558	236413
M130/ 1640	18.005	1.2025e-07	8.8057e-07	None - Full; RDI - Full; None - RDI	42080.5	48148.8	28178.9	35268	53163.6	83887.4	23927	27137	64160.9	65606	79256.7	62229.4	94439.3	39645.2	62274.8	54583.7	66750.1	37380.3	30018.1	36202.2	36551.3	36394.3	17366.6	22846.3	32114.5	31089.5	166151	76026.9	12678.9	17690.1	16282.2	29936.6	40249.2	39735.7	73712.5	31129.4	69391.6	42337.8	0	0	10331.6	11705.2	41028.6	32541.4	6166.64
M131/ 2140	17.601	1.6539e-07	1.033e-06	None - Full; RDI - Full	42117.1	49534.8	120180	133385	50123	56574.7	66259.9	69309.6	60343.5	65824.5	37678	38928.6	37021.5	40181.5	37818.2	35696.1	36419.6	35584.1	219707	123175	101248	116321	61553.7	64409	40400.3	40382.1	28723.5	36954.6	85738.1	87717.5	109777	97779.4	27102.8	24845.9	38275.9	38515	54125.9	44359.4	407.629	127.162	121722	123776	86664.4	103166	148257
M173/ 1880	12.628	9.5238e-06	2.3611e-05	None - Full; RDI - Full	42326.8	91842.8	43755	59831.6	18565.4	23872.4	63522.2	34252.5	82638.9	78242.4	78236.8	47770.2	30848.2	37113.1	110718	91207.2	47722.4	85502.1	55892.7	26531.3	11359.2	27632.7	42528.3	53988.9	103261	60853.4	12007.2	76818	46893	40458.4	16523.3	7297.33	37300	35389.8	19960.7	37950.3	8881.29	25354.4	0	0	28030.3	40290.3	21405.3	19383.4	27996.9
M116/ 1640	17.386	1.9609e-07	1.1667e-06	None - Full; RDI - Full; None - RDI	42746.6	52518.3	27802.6	43722.5	54310.7	88523.4	27627.2	28806.7	69781.5	70182.3	90244.3	69775.7	107603	44256.9	64581.6	57470.1	77770.7	37124	33147.3	39889.2	42070.5	41997.7	21812.2	22756.9	34198	34775.4	173386	85556	17634.9	18851.6	18609.9	36388.3	44436.5	46519.1	78591.5	38519.1	76598.2	48500.8	0	0	13803.2	12517.6	46339.6	37342	12621.3
M144/ 1640	16.655	3.5078e-07	1.779e-06	None - Full; RDI - Full; None - RDI	42819.8	48552.9	30720.7	41585.8	52038.4	87936.1	27122.1	31389.9	64891	68435	85750.5	67224.6	105329	40104.8	63606.6	57115.8	70151	36417.1	31231.9	36460	36425.7	38790.2	20754.7	23608.6	32445.8	32873.2	165770	82647	13990.1	17851.2	18561.3	32202.9	46405.4	45326.7	77361.2	37924	75404.7	46480.1	0	0	13367.9	12203.3	45915.9	36109.5	8604.09
M58/ 1640	16.325	4.5694e-07	2.0758e-06	None - Full; RDI - Full; None - RDI	42910.9	47815	31306	39582.6	51286.7	77301.8	25557.7	31532.8	59051.8	61853	77782.3	60697.9	88707.5	42361.7	58437.3	50435.6	66720.7	33649.2	33401.2	36185.5	37587.8	37944	23375.6	24284.5	30814.2	33233.1	137251	72817.6	17915.3	20219.1	20505.1	33973.5	44802.6	43471.6	68424.9	35106.8	65944.9	45155.5	244.511	266.565	17140.6	16191.1	43693.4	34596	12055
M74/ 1130	9.267	0.00017069	0.00028914	None - Full; RDI - Full	42985.6	11015.7	53733	16853.4	56455.5	13004.9	48953.3	24777	46131.4	12550.3	6223.95	21525.4	50468.7	3598.42	32161.8	7023.63	45842.9	35814.6	36006.8	37393	35503.5	37788	22193.5	23381.5	29931.6	5214.64	43701.9	24366	48455.9	63752.1	105109	74107.9	83392.3	45583.4	87365.4	76182.6	79773.1	70916.6	354.469	0	72833.2	33610.6	34122.4	75496	62879.2
M157/ 1440	12.949	7.2746e-06	1.8517e-05	None - Full; RDI - Full	43572.7	39033.7	25580.7	19324.6	30273.2	43620.1	35107.4	33512.6	77655.9	68389.3	112488	88736.3	67290.4	55788.2	104247	94345.2	51858.4	42447.7	18937.6	29377.9	15835.6	12920.8	17237.1	18568.1	38433.1	42007.9	117615	83498.6	30485.3	30319.6	8941.47	15313	98672.2	90622	91042.7	81442.2	46603.1	42729.2	0	0	3512.63	8777.2	69219.2	69065.8	6555.39
M62/ 1440	7.3352	0.0009509	0.0014554	None - Full; RDI - Full	44477.7	38404.1	23293.9	20431.4	34092.7	40042.4	32383.1	32112.3	67856.7	62707.1	93509.7	80381.7	59879	53350.8	89713.5	81399.6	47501.9	40343.5	23155.2	28886.6	18292	17434.7	16076.7	16635.8	37102.3	40593.7	100534	73732.5	31018.3	29234.1	14641.3	16371	80252.1	80138.9	78913	71458	42785.4	39170.8	0	0	25121.6	38602.7	64055.2	58671.2	23704.7
M83/ 2260	24.654	7.81e-10	6.196e-08	None - Full; RDI - Full	44815.7	249828	160817	351666	158628	338988	59409.4	210719	81145.6	206857	111522	142951	166135	261014	90915	98447.8	216273	172140	365921	443246	392219	302858	292142	317274	192555	186611	232435	179195	107787	225590	225236	388919	176930	260170	176249	137508	256700	250299	2278.52	2949.88	147725	304747	297450	274036	230289
M143/ 1880	14.799	1.5743e-06	5.0978e-06	None - Full; RDI - Full	45204	86290.5	41516	61704.1	15533.8	23768.6	61418.9	24116.6	73177	73814.4	68072.1	41185.6	24803.7	28468.9	100188	82602.6	42531.3	71765	54923.8	9753.32	16241.5	25927	41819.3	51408.5	97704	55258.5	11040.3	67278.8	29295.7	36256.3	15935.2	7768.4	36503.8	31814.9	13484.3	37795.4	8676.77	18234.5	0	0	8739.19	21912.7	18860.8	22796.2	16853.6
M62/ 1790	11.269	3.0138e-05	6.4912e-05	None - Full; RDI - Full	45560	47348	103387	112953	56789.1	60346.5	38253.8	43480.5	33889	39173.3	13892.7	18366.8	29493.8	34571.9	14111.4	12656.8	25333.2	21205.2	246783	179255	128408	130029	69539.8	77310	24194.9	29542.4	16081.3	19262.8	98486	98981.9	140769	125378	16243.1	15037.5	25862.7	26232.2	43491.2	46964.9	1851.1	815.034	228243	218859	120030	123253	254970
M69/ 2090	17.224	2.2286e-07	1.248e-06	None - Full; RDI - Full	46161.5	72923.3	227058	281633	88876.9	195548	39540.1	34659.1	32249	46787.4	133417	38370	40644.4	86956.1	190091	95663	92784	138071	310412	363079	305857	218841	119121	117616	126269	73905.8	49435.6	152576	42644.7	89943.7	289635	509964	24961.3	47549	28790.2	86933.3	53090.5	58889.6	918.351	412.357	118500	168577	264422	259987	193822
M90/ 1640	16.368	4.4132e-07	2.0595e-06	None - Full; RDI - Full; None - RDI	46682.6	55273.9	32509.7	45306.1	59584.7	97365	30916.7	33315.9	68791.4	75678.3	95045.9	74080.8	114219	48342.6	71349.7	63525.2	81409	41906.5	35072.6	42215.9	44265.9	43843.3	25220.1	26179.8	36466.5	38582.1	182660	89931.5	19850.3	21177.2	17851	39993.7	48831.2	49219.2	85749.7	41086.5	82864.4	51976.1	0	0	11966.7	18048.1	50824.4	38279.3	10635
M88/ 2280	14.227	2.5163e-06	7.3033e-06	None - Full; RDI - Full	49750	166020	197598	311644	85379.6	232280	51035.5	62930.5	46283.9	106438	72368.5	81587.1	91925.9	93407.1	27646.7	34364.6	119688	80089.5	361924	435186	353603	300934	159690	201102	87746.9	75575.6	114800	53082.9	115024	140995	324578	556334	95519	106435	115788	105804	171964	128108	3658.18	7349.95	207892	342482	288139	237371	248058
M69/ 2280	19.25	4.5459e-08	5.4096e-07	None - Full; RDI - Full	50331.4	180790	184614	378837	92294.4	272199	55941.3	101745	59572.4	127385	84862.1	43544.9	92968.6	114892	59087	44421.3	172875	106814	458887	553909	446248	332859	224226	232439	125740	136458	111006	161402	96575.9	145396	275495	589285	78463.5	93750.4	92351.8	102583	154271	134763	3215.43	5566.54	211053	404564	323429	276859	302359
M239/ 2260	6.3259	0.0023749	0.003436	None - Full; RDI - Full	51273.5	261202	159169	340668	191991	322578	86109.6	212272	106067	206901	111215	138063	155709	0	93182.3	108679	196973	167647	349336	436912	387810	291360	277861	299571	182201	182705	219954	180210	139363	217262	230511	408061	208574	245313	187691	188974	280195	246309	2120.54	2495.73	151817	290559	290685	258026	221292
M41/ 1790	6.2662	0.0025079	0.0036175	None - Full; RDI - Full	52592.2	59683.8	111031	85393.5	72471.8	69266.1	47645.8	62726.8	46422.7	61104.7	26618.1	25016.8	39014.2	37381.5	22953.9	51041.6	34410.4	38151.8	169498	141775	116027	124408	53158.9	48752.4	29032.7	34012.5	66121	81139.4	102172	98176.5	141568	122853	59330.8	60236.2	60153	35149.6	49502	51362.4	3196.56	2063.69	203245	193252	113220	111808	222933
M161/ 2170	10.51	5.7824e-05	0.00011054	None - Full; RDI - Full	52680.2	116091	54961.2	126133	3815.22	23829.9	20807.5	45583.5	77952.4	172854	12984.1	85965.4	9974	29470.7	36544.5	38134.5	20386.7	35126.6	74440.8	22329.1	20104.1	37261.8	32423.7	36136.8	44716.2	43599.9	7905.07	31801.6	97315.4	131713	63367.6	35964.3	9346.13	15663.2	25749.3	49142.6	18484.6	35574.4	41.6543	0	37793.8	46387.3	71236.6	105947	108000
M56/ 2060	22.541	3.7132e-09	1.3596e-07	None - Full; RDI - Full	53203	119413	38842.7	214359	126726	186350	60354.4	95433.3	151998	193693	235680	65553.3	60788	78854.8	180817	149461	66264.1	65136.3	204599	286538	237506	176567	146144	155643	99921.5	94670.6	60834	50664.7	26905.7	108375	186743	347505	67216.7	70289.3	58633.5	61113.9	90397.4	89632.6	658.5	802.253	91148.2	129096	201339	201112	110030
M58/ 1100	4.2254	0.016629	0.022234	None - Full	54405.6	88558	54137	52403.1	96839.2	131891	41031	61078	50068.1	49174.2	51773.4	39460.7	67597.9	37256.3	47608.4	35568.2	68981.4	53736.8	183040	100255	35471.7	118813	73261.6	51419.5	44267.7	56543.6	41018.4	47216.4	62334.8	63720.5	132161	244401	42665.4	47596.8	100778	99700.7	95115.7	60207.6	5879.99	4511.89	284079	243029	81480.9	72588.1	304813
M155/ 1880	14.893	1.458e-06	4.8532e-06	None - Full; RDI - Full	54526.7	113764	54844.7	75972.4	10616.3	33697.1	87620.8	39132	106732	94242.5	96166	59304.2	32616.7	47814	141283	110204	61154	14299.4	76425.1	18489.8	22244	37962.4	60711.5	70073.9	130438	74675.2	41521.2	98696.8	59624.9	55750	21970.4	21483.7	44474.6	41892.6	16638	57048.1	20842.4	12988.7	0	0	8234.53	19308.8	16202.3	13006.8	18447.4
M144/ 1440	12.38	1.173e-05	2.8199e-05	None - Full; RDI - Full	55209.9	47316.6	30744.6	28558.9	40251.9	50207.6	39668.5	41191.2	89618.6	79640.8	132918	111517	78603.3	69610	93196.8	105482	58313	51454	20997	26346.7	22659.4	18727.1	17358.9	20735.3	44542.6	50341.9	139557	99401.5	39346.1	35796.1	16173.6	19090.9	114278	105470	106859	97268.5	56333.2	50049.1	0	0	8344.83	8425.55	83879.9	78991	7710.16
M41/ 2090	13.544	4.4285e-06	1.1776e-05	None - Full; RDI - Full	55449.2	106070	209285	255949	85310.6	157578	207906	148918	44276.4	50145.4	222400	139881	114938	45955.2	244949	142500	58280.1	212153	246297	307338	214010	210512	73979.8	77111.6	80610.4	210959	27938.5	30886.6	92892.8	107531	283414	437253	61735.4	49763.6	56037.7	78008.2	56560	57800	2169.8	1671.78	132313	141525	226172	210166	186197
M90/ 1440	12.67	9.1872e-06	2.2896e-05	None - Full; RDI - Full	55659	49360.4	28494.5	32358.1	46606	54527	42542.7	46253.2	93554.4	85577.3	137427	114607	79581.8	74488.6	125245	116091	68361.9	55760.4	26723.4	35802.7	25340.6	22825.7	22952.4	22313.5	50325.7	55208.4	144875	106989	31427.1	41873	13502.2	19369.1	113700	115386	110867	90363.6	55731.9	54918.6	0	0	8223.87	9378.5	89713.4	85511.1	7603.43
M44/ 1640	9.0651	0.00020383	0.00033923	None - Full; None - RDI	57774.1	66179.1	43241.7	60818.9	76103.3	104048	45747.8	47826.6	90781.4	82267.9	108914	84300.2	126110	61902.7	78549.1	76736.2	91100.7	52936	51047.3	53196.2	58557.6	55807.4	38726.7	38236.6	48055.2	52706.7	181553	104523	27024.9	28629.8	28344.5	53339.2	61472.8	63376.1	95495.8	52356.2	92938.2	65460.2	817.598	443.878	25599.7	26251.8	61844.4	54306.6	17180.6
M241/ 2260	23.878	1.3788e-09	7.4121e-08	None - Full; RDI - Full; None - RDI	58079.9	297628	183185	391874	214868	382029	99058.2	243222	121203	231720	123821	163409	177219	283450	105219	129556	228741	190727	396424	493263	442825	327508	316909	337508	207007	209957	249022	205626	160468	246785	260765	461630	236264	284733	226331	212750	324069	275429	2082.23	4323.87	171795	327356	324857	292143	254343
M57/ 2260	25.357	4.6836e-10	6.196e-08	None - Full; RDI - Full; None - RDI	58514	456355	205955	599967	330338	578351	135842	375818	147220	372547	159562	268001	266170	431114	185002	199564	353125	262729	602545	742564	679519	496522	503175	526711	334346	326985	396058	335511	193918	320409	367623	665389	187372	401386	287643	299651	421450	423551	3835.34	6817.83	212094	462257	487511	453425	372032
M44/ 2860	5.4573	0.0052741	0.0072979	Full - None; Full - RDI	59635.5	120625	96726.3	124113	88221.4	170083	113749	142483	134657	48449.6	135820	20541.5	165034	127005	158445	109917	94625.6	92634.5	9965.49	164320	38016.4	94623.1	93874.8	89633.4	163892	87532.8	127336	114690	91071.6	93200.3	55302.7	249291	95466.9	188729	76109.4	107859	86586.2	122440	77361.2	108033	115311	85985.7	12387.6	125799	96549.5
M41/ 2200	6.4016	0.0022163	0.0032261	None - Full; RDI - Full	59694.2	92197.2	39187.8	101698	43620	66031.9	80873.3	119932	63226.6	140959	116385	149344	70260.3	90491.7	136214	106270	131158	194427	58714.2	44368.7	43105	104162	103872	115268	177915	147123	68453.1	155322	161256	12046.1	56714.2	47548.6	11775	9616.26	22202	15348.2	6044.83	19843.8	1124.39	806.36	39535.8	52849.3	5594.51	5850.58	65747.4
M99/ 2100	18.056	1.1545e-07	8.5868e-07	None - Full; RDI - Full; None - RDI	60367	75417.3	34139.3	84879.6	36207.8	58463.3	81589.8	101384	46644.9	108072	168151	120879	75115	103732	242743	124281	114600	176566	101937	36034.4	54258.5	107384	161172	133810	160088	162162	54655.2	182205	176778	6177.28	3582.5	3266.62	5712.84	4182.96	7547.37	6465.82	1429.59	2114.51	0	0	2816.9	3850.97	24145.9	1556.3	1877.36
M82/ 1640	18.967	5.6627e-08	6.0311e-07	None - Full; RDI - Full; None - RDI	60812.9	68205.1	39489.3	62179.3	68603.6	115238	40058	45585	83339.6	84512.2	112638	86224.7	129598	58487.1	80357.5	72850.7	93863.4	48435	51846.3	54676.8	57097.9	61461.5	51525	31114.4	45955.1	41415.5	203201	98826.6	17442.4	22303.2	25318.5	41086.6	54921.9	53634.6	94065.7	38332.2	92002.9	60482.8	36.1426	0	27252.6	30434.4	64669.9	51074.4	25341.3
M157/ 1920	15.093	1.2382e-06	4.2403e-06	None - Full; RDI - Full	61136.2	128437	56892.3	100714	1461.11	25383.8	35197.5	80843.4	74468	152905	56843.7	130799	23646.7	66389.1	56721.4	64286.5	31331.3	69102.9	41441.2	26630.7	36174.8	49317.3	63634.2	77379	64094.4	71318.4	11178.3	69213.4	63392.2	116608	42887.5	35201.8	36571.7	50078.5	36233.4	99912	33309.6	46767.1	0	0	22490.5	22933.4	107780	155520	37851.4
M61/ 2260	21.754	6.7017e-09	1.595e-07	None - Full; RDI - Full; None - RDI	62104.9	277363	182667	363718	207111	349201	95189.5	223712	116205	221952	139913	159926	191032	275488	100853	137467	221519	191446	363297	444642	409376	306936	295553	317618	193262	205166	230089	197799	164607	231783	254304	424207	235236	266845	227072	211037	310429	267356	1952.75	4275.95	165259	309776	301827	270765	236788
M102/ 2060	17.571	1.6928e-07	1.033e-06	None - Full; RDI - Full	63361.6	135558	168350	239058	151637	206690	78453.1	110709	66612.6	88146.5	51852.9	70649.5	68883.4	86926.7	40076	34979.6	72237.9	76805.4	227924	321147	266734	198647	160353	161970	107806	104742	69052.6	57044.8	91247.6	119422	214615	382914	69904	87342	69112.8	91122.1	115523	95085.4	495.968	244.573	110082	147798	220048	222301	125169
M70/ 1770	20.411	1.8587e-08	3.0508e-07	None - Full; RDI - Full	63380.2	88546.1	53594.2	79080.4	49201	100171	93487.2	75794.7	86518.3	129539	110982	127373	21341.6	73308.9	91398.7	76850.4	67895.4	67759.7	80534.7	59609.2	55209.1	66036.4	64799.6	66548.7	66610	84578	55447.3	144880	45507.7	59078.3	40407.1	41206.9	43571.3	48466.8	52065.1	52498.5	16882	45238.3	103.807	139.423	16798.3	31302.2	74786.1	70528.4	21029.8
M122/ 1670	8.5849	0.00031145	0.00050425	None - Full; RDI - Full	63405.8	66814	125930	129017	103017	105747	53118.3	59809.9	44721	48058.6	27107.4	51320.5	33125.9	39319.9	29512.2	28081.2	29039.6	33488.2	276557	199221	125965	135915	58614.2	55853.2	39119.9	42249.2	61733.8	68785.7	91382.6	92315.1	275096	252215	36338.6	36467.9	31664.3	28130.7	39187.1	36369.7	7868.49	4555.42	241874	229233	154180	155270	168483
M58/ 1380	3.4716	0.033912	0.043045	Full - None; RDI - None	65886.4	30520.6	43027.4	33291.7	67776.4	33885.8	40748.5	53887	117862	61795.2	71201.9	59716.5	71316.6	61807.6	30934.2	68243.3	78710.8	60289.8	56485.3	69569.7	8456.97	63754.2	72730.6	46536.2	16595.5	76700.4	48136.7	87909.7	73098.1	45055.4	81657.4	49464.9	59569.8	75330.6	43721	23659.2	10599.2	39708.3	46108	14084.1	90727.8	130085	95413	58953.5	74336.6
M107/ 1890	5.5681	0.0047615	0.0066078	None - Full; RDI - Full	66294.8	73467.5	82940.5	90066.1	50528.9	43302.6	29044.4	36416.9	47702	46702.9	39607.8	21828.7	18473	31320.6	16440.1	18590.3	38695.2	42972.2	131263	80259.8	79202.4	94179.9	28123.1	27133.4	30029.2	19156.2	16489.8	26131.4	55452.1	52446.7	122288	105921	53911.2	49263.7	45869	19777.3	31642.8	32454	16018.2	259.084	154962	156653	58302	63577.2	111632
M94/ 1180	6.3675	0.0022863	0.0033179	None - Full; RDI - Full	68514.6	29819.8	111938	57940	1015.18	82470.3	74402.6	34627.1	59660.1	21724.4	22360.5	471.544	136.14	2537.16	27339.1	24917.6	27954.1	13329.2	90484.1	50690.8	67755	71613.4	0	141.153	36771.8	33125.2	64828.7	63815.1	50568.5	46525.1	75089	61277.2	83876.4	74200.7	11106.7	6026.75	0	28966.5	0	0	53876.3	54642.4	46717.5	33372	41165.8
M171/ 1850	18.25	9.9145e-08	8.1367e-07	None - Full; RDI - Full; None - RDI	69451.2	105595	132099	183530	116164	169298	55163.5	75648.4	93383.8	97946.2	97230.5	95378.5	137016	80238.8	59086.9	70598.3	120286	76834.5	151606	233220	214559	173867	94206.6	99770	69144.9	65386.8	141355	82794.6	61560.1	74476.3	147915	252855	42994.6	45748.7	103607	56060.7	135743	94257.2	0	0	83167.7	89737.6	140033	108934	93204.3
M89/ 1540	21.756	6.6924e-09	1.595e-07	None - Full; RDI - Full; None - RDI	70033	109519	113079	230382	164209	339798	58821.2	85516.6	97808.7	136316	51527.4	70223.7	106956	76291.8	42919.2	25264.4	78451	50506.9	273344	280469	253016	304640	85406.8	89825.8	54487	60060.3	175866	131881	37592.9	48605.3	60223.6	100121	23221	23854.2	36456.1	20768.3	77117.2	52427.4	170.228	112.289	71905.6	84161.9	55439.3	49416.9	74812.5
M65/ 1820	13.111	6.354e-06	1.6261e-05	None - Full; RDI - Full	72395.4	65332.2	144442	148877	89235.3	100517	63266.2	62331.9	52785.4	45567.9	51747.3	47667.5	46981.4	47261.7	63518.7	57091.6	55921.7	53449.7	369117	274477	195101	213294	66899.7	79605.9	51259.9	58006.3	36846.7	47511.1	96552.7	80062.6	222791	179471	27343.7	25217.7	61693.6	50590.5	65040.7	61558.6	2550.7	1052.54	1.32584e+06	1.30691e+06	110159	110402	996957
M193/ 1460	5.0239	0.0078821	0.01072	None - Full; RDI - Full	72929.1	2007.07	59681.5	33959.3	26194.2	29203.6	79169.1	38972.9	37548.9	37549.4	77773	40591.8	52076.3	16270.3	45184.8	28040.1	54648	66709	38236.8	48773.6	49319.1	58130.3	3603.12	57326.6	38163.7	30133.1	52006	28919.4	45488.5	102847	127924	59189.1	77312.5	11526.8	69755.1	69585.9	59770.5	88926.9	4154.76	788.189	11693.1	7404.73	83174.4	140630	29387.8
M85/ 2350	3.6258	0.029293	0.03789	RDI - Full	73315.5	8927.2	218286	158821	90454.8	66505.5	58721.2	23784.1	44330.7	22842.6	44163.1	10527	104214	56309.9	36740.1	19995.2	44937.8	27530.5	178968	120676	121444	135542	74185.3	62436	20374.1	25604.9	8210.19	16621.7	126106	80804.2	147285	221971	25340	9259.58	61094.1	52431.7	96768.1	52197	2203.67	1133.17	88144.4	93359.2	27892.8	58442.7	168520
M46/ 1580	8.4749	0.00034335	0.00055029	Full - None; RDI - None	73604.6	13037.9	113885	70627.9	153057	44271.1	37172.4	123467	81927.5	95297.7	45588.5	56130.1	65139.4	126232	18620.8	47262.1	79286.6	31174.4	101989	83847.9	113895	131820	121663	69365	9043.61	62273.1	26697.7	61725.1	137108	61485.4	127329	38366.6	48165.9	56090.4	55604.9	34681.5	26297.6	44055.6	108266	39212.4	86128.1	120937	121160	116961	111128
M122/ 2470	7.324	0.00096055	0.0014655	None - Full; RDI - Full	74555	70419.5	98901.7	87202	263944	66138.7	73976.2	56198.1	51591.8	74234.2	53375.4	64298.3	37320.8	51573.2	61194.7	51197.3	63658.1	49454.5	108085	102698	94093.6	102843	55619.4	55352.3	38200.4	40112.3	33922	39508.9	86310.9	42198.7	105325	92244	32447.8	18306	41562.1	24439	29454.6	27261.3	0	0	151003	165221	49071.7	55491.9	114511
M157/ 1540	20.672	1.5221e-08	2.6834e-07	None - Full; RDI - Full; None - RDI	74687.9	111226	115970	238090	172734	356820	63304.7	84769.7	98773.4	144046	69496.7	71294.4	111328	75647.9	45884.9	36858.2	79946.9	47384.7	282589	296080	263272	323725	85965.1	88125.5	53960.2	62214.6	185370	138050	43644.5	46645.4	59449.5	105028	22119.8	25499.2	35079.6	23094.3	79070.4	56741.7	0	0	72103.5	92356.7	51006.2	41863.1	71809.8
M72/ 1880	14.524	1.9722e-06	6.1761e-06	None - Full; RDI - Full	75164.7	131301	65799.4	87513.9	26888	37043.1	96194.5	49260.3	122130	113673	113454	69911.6	44861.6	55151.3	159771	132944	69578	123111	81458.7	15345	21534.1	40231.6	69197.9	80380.9	150315	90800.8	19306.7	110201	76421.9	65244.2	29022	15110.9	65672.3	54820.3	31495.3	64504	18506.8	40706.4	42.9826	116.074	17782.6	24630.1	32920.7	31898.9	8606.69
M143/ 2060	16.653	3.5131e-07	1.779e-06	None - Full; RDI - Full	75182.4	165651	206811	294228	179057	256613	85189.7	133938	76519.8	99970.4	65191.3	81733.7	83687.9	97294.3	36913.4	46208.9	87111.1	92930.1	274936	399761	337209	248213	199121	205324	132056	128365	81477.2	66857.8	107465	152206	268720	488711	87647	105009	87040.7	112484	143214	116817	690.781	948.782	133054	175238	275444	275335	153925
M61/ 1330	12.23	1.3313e-05	3.1528e-05	None - Full; RDI - Full	78434.6	59244.1	142540	132468	135380	134431	69140.3	67825.1	74982.9	69818.9	44691.3	6120.05	71624.6	74646.8	5629.64	34014.8	54140.7	51103.6	183814	236037	170048	165049	116993	86768.1	45624.5	52755.9	58496.6	53199.1	140316	137492	200427	169153	57009.7	51682.2	71950.7	68460.3	104940	118651	391.091	152.435	221299	246324	153839	160154	210273
M82/ 1440	11.724	2.0439e-05	4.5462e-05	None - Full; RDI - Full	78964.7	73750.7	31914.7	31681	55467.2	79039.8	62855.9	57198.4	144293	130026	205407	183219	117406	115019	192191	177935	105986	73510.8	34349.3	45785.5	38023.8	27739.7	38239.1	28190.6	78675.8	86592.5	226304	168517	51982	59600.4	19775.1	21598.8	173766	168067	153892	154153	92618.6	63157.3	0	0	10873.6	11519.4	130551	131374	11276.2
M83/ 2060	18.825	6.3236e-08	6.2709e-07	None - Full; RDI - Full	79379.1	201490	254841	392286	228642	336224	102460	156670	85480.4	114766	63465.7	85432.4	110056	130979	58332.5	50861.6	110286	117256	373586	524772	442765	335155	260882	280016	152110	164810	99073.3	91285.4	75001.2	176876	356276	648464	119126	112847	109634	124010	173824	137137	1019.1	1318.09	179757	229271	328061	364915	206268
M61/ 1720	5.8915	0.0035352	0.0050232	None - Full; RDI - Full	79500.1	154035	37639.7	93891.3	17905.5	130628	86238.1	176750	133915	243871	110321	204403	84545.5	167791	145950	150102	115057	101081	66702.8	68718.9	56604.2	62977.5	117524	100177	161106	153802	108558	126730	113106	105004	72622.5	64485.5	125708	143297	115935	105451	102554	101267	956.236	287.804	28224.3	46883.5	66657.8	56712.1	41993.6
M44/ 1440	7.7144	0.00067637	0.0010487	Full - None	79555	68406.3	50268.5	48820.5	63998.1	75503.2	60636.8	57851.7	120898	108663	162603	141413	106614	96738.9	150975	139969	88030.8	75931.4	1.89087e+06	2.33519e+06	2.31678e+06	3.37959e+06	35505.8	34900	72022.2	74161.1	171958	130868	59390.7	53475.1	1.87191e+06	1.34675e+06	145655	138525	136131	125287	82783.5	71090.2	1.86314e+06	1.22102e+06	4.63738e+06	4.33117e+06	112822	107539	3.67523e+06
M89/ 2260	24.959	6.2527e-10	6.196e-08	None - Full; RDI - Full; None - RDI	79583.7	503497	292623	668044	371341	668654	159105	411393	192726	382739	227737	288940	298267	501600	190913	219755	410389	324539	685570	846055	766852	568911	544358	581994	365875	377051	432424	364271	232957	406957	434045	779732	357740	494309	392881	340794	558484	483024	5052.61	8094.9	279433	562339	561614	512900	426218
M88/ 1040	5.7767	0.0039289	0.005533	None - Full; RDI - Full	80181.3	69349.3	173741	182437	116054	109184	102848	112421	77962.7	80242.4	54565.4	57076.7	59049.5	66058.7	44950.5	41297.9	56127.9	54438.6	570021	531382	316715	299550	157435	162482	49721.1	52607.9	61958.2	56053.4	214965	194975	249267	185195	59762.8	66766.4	73094.6	70106.1	111457	146505	8523	6223.49	580924	624870	214970	206563	487505
M60/ 1950	14.443	2.1075e-06	6.3896e-06	None - Full; RDI - Full	82438.7	69788.2	115410	121743	132391	87657.3	62503.2	71338.6	88748.1	90200.5	47466.3	50484.4	38049.4	53194	28881.1	27949.6	37208.5	36407.7	213988	146328	91100.8	106180	56868.1	55930.3	36709	42578.7	26350.3	36221	75041.7	72916.1	124620	101335	24216	27627.7	34800.7	34767.8	40198.5	45578	2668.34	846.141	459024	428311	78710.3	70693.1	312996
M57/ 1720	6.6585	0.0017541	0.0025849	None - Full; RDI - Full	82744.5	145416	52843.2	100938	27751.7	130806	89482.8	158707	110357	214962	90723.7	182515	61638.1	106210	124388	133191	91763.8	86575.9	83631	49533.6	57886.3	63672	88485.4	84897	130174	134952	90468.6	94257.6	98935.1	109656	91097.4	89984	119319	123711	112878	106025	97848.8	86026.4	2252.82	1994.88	40786	64076.6	81037.1	71286.7	63445.1
M115/ 1430	5.7075	0.004187	0.0058791	None - Full; RDI - Full	83015.1	743895	70593.8	69126.9	47797.2	45583.9	56961.6	55054.7	463.059	62943	77284.4	52778.5	46824.2	871694	53382.7	57394.8	38784.2	39653.2	114833	65137.8	60662.5	60276.3	43070.8	42357.3	41836.8	79673.5	1.84646e+06	56971.8	643957	66308.2	78567.9	386784	1.70605e+06	55214.2	46948.1	40266.3	36188.6	48210.5	1020.99	329.996	96351.8	78580.2	61684.2	65746.3	99093.9
M143/ 1540	20.472	1.7737e-08	3.0153e-07	None - Full; RDI - Full; None - RDI	83185.3	127140	133077	280333	201147	420597	76222.7	97757.3	115273	169914	82656.5	84167.6	128903	89279.9	54113.3	43936.2	96085.1	54060.3	336616	347150	309749	377239	102750	110266	59255.2	73559.8	218229	159151	46583.2	47675.5	68143.9	122012	30077.8	32984.9	44282.1	26601.7	93040.4	68305.6	0	0	86117.7	109830	43217.7	47209.3	84296.1
M125/ 1440	11.789	1.9338e-05	4.3561e-05	None - Full; RDI - Full	84617.3	75970.3	15539.9	26501.1	67956.4	34638.9	53358.9	79481.1	182323	146326	243101	213758	158982	136228	247482	222790	109954	71807.8	43026.1	49169.9	45822.5	35286.6	33963.8	35934	66618.7	580.747	278668	196204	63448.7	70235.8	22399.5	16755	198723	207520	198346	14080.5	18689.1	21415.8	0	0	14459.6	16996.1	161798	148154	16283.3
M116/ 1440	7.759	0.00064989	0.0010109	None - Full; RDI - Full	85586	87569.1	56381.1	4176.1	88949.5	128304	82672.8	85374.3	136911	113234	183382	154999	110289	115810	174828	156882	95568.9	74825.1	50656.6	57108.7	46426.8	35943.3	36959.1	43198.8	76737.4	72147.3	220450	184151	58169.4	71568.1	22617.1	29970.9	158587	152250	151033	139515	90395.9	81738.4	0	0	35480.5	39385.2	136054	154373	33797.8
M45/ 1330	10.275	7.088e-05	0.00013283	Full - None; Full - RDI; RDI - None	88453.1	89076.7	100895	136125	108864	114041	136110	62720.3	125735	64368.4	244077	84062.2	231494	1.0231e+06	86495.6	60479.7	142559	105896	161206	131388	111801	101378	432530	85122.6	74401.5	642431	125886	73048.4	101576	171746	131501	170263	131208	103633	124270	116701	150334	166081	683266	218024	191345	160497	82658.6	175405	179528
M137/ 1510	15.456	9.2179e-07	3.2569e-06	None - Full; RDI - Full	88828.1	87808.2	119235	129129	24706.2	140166	66368.7	90881.6	77302.2	71642	48239.9	49286.9	48706.5	69522.9	79100.6	68334.5	57044.4	52861.3	156326	115174	91650.2	100415	57323.1	54226.6	59699.4	57609.4	98809.2	130723	62345.1	55539.7	50710.7	61743.7	52765.6	59344.6	25326.8	28267.3	43534.9	49535.2	736.663	224.286	119944	124045	78783.4	77418.8	132321
M44/ 2900	11.654	2.1704e-05	4.8051e-05	Full - None; Full - RDI	89274.6	117450	162809	15860	368892	73331.9	80653.8	194151	13353.9	72839.9	79920.4	7578.81	66816.6	51552.3	77569.7	63030.7	109174	63614.6	165277	162178	279493	104041	106537	106135	149965	107770	77455.5	80688.2	146101	107438	93354.8	284336	108041	120690	89847.5	94956.3	268589	98995	101291	108534	156677	179108	112517	192219	22665.7
M41/ 1380	7.1511	0.0011226	0.0016963	None - Full; RDI - Full	89872.4	43385.8	77848	61812.1	97386.1	38151.5	56303.8	79906	123726	91886.9	103847	81107.7	84636.2	63529.7	41208.6	74356.1	91795.4	80016.4	47839.3	75066.8	61817.9	44910.4	79920.7	77175.2	30163.3	74871.1	93395.8	97927.8	90724.6	69492.4	116336	41392.7	61592.4	81543.2	56994.6	59386.6	27597.8	48011.1	6381.79	2262.71	167099	55528.2	66779.4	77452.9	44672.2
M56/ 1100	3.8984	0.022632	0.029759	None - Full; RDI - Full	89979.8	130601	149447	147592	537016	237738	95646.1	105275	546491	102411	1.01331e+06	85735.8	91299.6	528178	99002.1	92091.6	605079	84957.9	424745	220349	230146	229623	431529	117604	127923	572074	82610.5	462728	123677	108116	207617	379201	62574.1	87718.5	162283	179354	154949	101820	9122.31	8244.79	642150	672056	142797	132370	654689
M134/ 1260	14.053	2.9059e-06	8.2826e-06	None - Full; RDI - Full	90233.1	124443	157564	219846	0	226267	144902	205316	69763.1	101373	7437.27	65199.7	85080.6	161486	45737.9	60729.9	59596.4	66956.5	195015	135189	166292	211126	94793.9	108771	70380.9	92921.4	176651	254520	7339.52	86987.5	97178.6	96578.8	47319.4	78924.7	30327.9	28181.3	64068.7	66696	622.656	296.023	206606	239446	163754	186741	212541
M71/ 1540	19.992	2.5632e-08	3.6973e-07	None - Full; RDI - Full; None - RDI	91607.8	135311	142114	294778	206066	434175	77558	104964	120134	178919	86572.3	88826.7	134705	95043.3	62798.7	48759.4	101899	62876.1	342498	359446	320113	389807	109889	114918	68097.5	76924.7	228238	169333	54594.4	57420.8	70489.4	135130	25992	20549.3	50449.4	29947.3	98251.6	73533.3	444.103	187.089	171751	120164	66849.5	57753.8	91914.2
M75/ 1580	7.1388	0.0011351	0.0017098	Full - None; RDI - None	91781.6	35160	142150	91376.7	207844	52262.1	58416	142795	112052	114629	58330.5	73615.4	87446.7	130367	21035.1	52174.4	95712.2	32059.2	120423	89820.2	111615	159945	135323	81046.5	15956.9	71159.1	27783.3	74373.8	182287	69125.1	168431	54164.7	62723.2	63318.9	62689	48055.1	36624.9	57590.9	120051	29862.2	116366	154377	154390	148966	130384
M68/ 1640	15.677	7.7054e-07	2.8433e-06	None - Full; RDI - Full; None - RDI	91922.7	124384	76426.3	100431	2536.1	218730	57651.9	70542.2	154378	175596	205006	173933	261219	115983	161026	138612	189022	92821.1	79431.5	93674.2	102883	103836	53163.5	60821.2	87388.3	76390.8	420254	209712	11145.8	43409.8	44780.7	69581.2	88219.2	4391.02	186934	92268.2	183771	120308	41.427	37.3682	24266.6	38129.3	106860	87601.4	21596.3
M121/ 1820	19.037	5.3617e-08	6.0311e-07	None - Full; RDI - Full	91983.4	215413	75482	139451	9207.45	84723.1	21227.9	131064	110887	208769	114440	209685	67760.9	157370	148761	150414	98386	121066	200086	90739.8	58951.1	79988.2	74035.5	79292.8	133619	144165	39360	81800.3	85929.7	113272	71956.2	62658.6	24574.1	44153.4	84846.1	133646	78406.9	103549	454.4	0	118094	158801	87827.6	128612	239791
M42/ 1540	5.588	0.0046748	0.0065255	Full - None	92411.4	73070.3	113873	85068.9	180217	67948.1	60545.8	223856	83578.2	162087	20565.1	131703	52564.7	176257	25714	57233.9	125071	34904.6	136515	74859.4	61543.7	113898	155066	54700.5	6522.33	89190.3	13148.2	85938.1	177857	30276.6	154693	38772.8	60119.8	83173.8	79234	61592.1	63377.9	41818.8	92511.4	23522.3	92129.8	107181	137331	116568	74478.4
M133/ 1820	9.1054	0.00019673	0.00032973	None - Full; None - RDI	92936	86449.5	109494	121746	154322	66231	68568.1	82597.7	98671	59635.9	112986	69723	90872.9	138504	57912.6	64201.9	85199.6	86537.8	65161.6	98608.7	92726.6	106240	72922.9	64972.5	49389.8	102534	43044.2	71871.5	196001	105599	242769	150617	41016.4	85176.7	64114.8	59793.6	43905.3	49635.6	2147.92	1110.8	136568	157083	82840.7	131520	167545
M44/ 2690	3.5167	0.032489	0.041684	Full - None	93381.3	99946.4	99937.6	127879	47289.1	97047.5	10609.2	172234	7836.43	63705.7	42568.7	71985.1	87400.6	60295.7	67623.4	43811.4	45902.3	166022	14328.6	130899	57520.1	123338	160051	75242.9	95250	43364	153195	174731	139506	57281.3	332355	89801.7	168705	68687.4	19740.7	102754	75270.2	103342	86951.4	57470.8	67304.9	78519	109781	84599.1	118268
M51/ 1790	11.094	3.5014e-05	7.2779e-05	None - Full; RDI - Full	94361.4	100877	208438	229272	116985	128483	77875	89050	73388.7	83601.5	34487.8	35653.9	62553.4	65311.3	30509.4	24119.8	56024.2	54972.6	482342	374050	253247	268744	154252	146566	51878.1	61499.8	31477.7	42761.7	201947	197999	276947	249729	30470.1	31630.2	60752.2	59443.8	99287.1	97232.9	5727.1	1247.47	443073	434816	237740	243940	506735
M112/ 1430	7.3891	0.00090586	0.0013909	None - Full; RDI - Full	94777.2	54716.1	110933	75447.9	72678.2	17529.8	52161.2	78267.4	128714	79346.5	95039.9	50095.9	61565.1	55311.8	46131.3	74900.6	72784.7	42641.4	114254	144866	165827	159168	110339	74464.9	35187.6	82292.7	144225	145159	181299	96490.3	182961	53981.8	68302.8	190268	47454.6	50897.4	32994.3	64179.2	1461.83	270.396	130258	84322.3	118639	73949.6	121514
M70/ 1330	8.6082	0.00030509	0.00049734	None - Full; RDI - Full	95122.4	72397.4	174471	152146	162485	147604	75703	82036.2	14351.5	66631.1	51569.8	33468.8	71993.8	65149.4	40509.8	22006.7	68255.8	56414.5	201555	283718	153604	186009	141704	123239	53555.1	51872.8	31030.3	32010.5	172801	167574	244680	205426	66722.1	62637.3	88924.8	87040.5	114663	143955	1362	297.205	258519	298621	187254	182078	246401
M44/ 2830	7.0706	0.0012073	0.0018128	Full - None; Full - RDI	96162.9	10296.6	150177	75222.2	252847	94794.8	130118	139362	82898	164508	139989	161682	255969	76708.9	66157.5	72067.2	10029.9	10384.7	210598	201658	181508	94475.9	42484.8	85267.1	92210.8	165806	52162.8	12576.6	134316	86064.3	273612	117496	87676.2	39184.3	186339	143895	111842	219760	47603.2	71526.9	138481	242993	86669.8	18402	87061.2
M157/ 2260	23.856	1.4014e-09	7.4121e-08	None - Full; RDI - Full; None - RDI	96360.2	488113	299047	634606	350050	624759	164140	398067	197754	377456	205188	265003	289033	461660	173023	214833	376488	313922	640251	796267	715975	536368	513786	550123	338251	344040	404997	335389	262196	399514	415526	742431	383320	461794	365236	345493	524589	449099	4789.98	7303.55	283115	535921	527494	479608	416216
M105/ 2470	7.4256	0.00087658	0.0013503	None - Full; RDI - Full	96987.5	83900.2	115413	103452	315178	81453.1	91207.7	66065.8	73170.8	85209.5	58990.5	72538.6	40347.8	64150.7	62858.9	64159.4	72069.1	60046.4	133307	122123	109324	116724	64700.6	65614.6	43345.9	54098.7	40511.8	42888.6	96626	49311.7	135258	117464	34785.1	26413.6	47902.9	32107.6	41732.4	39312.6	156.441	72.1204	180422	196484	60014.7	64765.1	139734
M41/ 2260	21.345	9.1312e-09	1.8898e-07	None - Full; RDI - Full; None - RDI	97701.7	450295	290856	607254	329653	566261	165951	356712	203933	358967	207390	254695	278791	360280	155124	165530	328554	309139	486160	727546	497250	485301	468657	505127	317586	337478	397816	276902	269232	390284	419759	699380	370813	448148	365321	314085	506369	437082	6425.59	13041.7	281530	507599	469832	426231	392570
M77/ 1670	7.849	0.00059958	0.00093573	None - Full; RDI - Full	99729.6	95317.4	179812	188620	144701	143165	73859.8	72623.3	50955.5	73164	40468.1	44310.9	47510.2	56894.1	45574.8	32091.9	46467.8	48495.4	380011	281882	161064	193250	76397.9	68261.5	51127.3	58532.8	82936.3	93911.5	137310	134973	384694	351783	53793.4	58794.5	53924	53768.1	61931.5	43848.5	14620.8	6864.1	335395	326618	195783	229665	242080
M130/ 1440	11.451	2.5784e-05	5.6558e-05	None - Full; RDI - Full	101111	88353.7	54950.5	54577.1	74462.7	96162.9	76830.1	73691.5	166858	146516	244030	200661	144050	125973	223963	201250	116475	94433.5	45845.9	65111.2	43815.5	39557.3	41235.5	38340.8	86904.9	90135.2	258501	186645	72587.6	70734.8	30560.9	34831.7	209344	202641	199123	176877	107102	93866	0	0	17236.1	18304.3	157028	148000	18644
M71/ 2060	17.676	1.5578e-07	1.0324e-06	None - Full; RDI - Full	101374	211789	254916	351507	218898	305787	116446	164499	107297	129601	82138.1	112926	110684	131980	62097.8	58772.1	109383	120187	334276	464843	394558	295443	242401	251727	162146	158567	102461	90152.2	144223	185185	310651	566463	105003	133831	112756	137535	176944	137376	783.624	1433.99	161572	212194	325289	323458	183497
M213/ 2060	17.585	1.6749e-07	1.033e-06	None - Full; RDI - Full	101655	318081	374124	590249	319256	487778	140579	247762	134577	191001	105330	130058	155588	187261	72505.8	69280.1	148755	178315	551326	794986	666471	439767	385792	397861	233075	244157	157327	119614	148707	275759	466635	877515	152256	204296	156813	208983	229683	201045	556.854	1414.8	235827	347405	501470	544226	295566
M85/ 1850	17.653	1.5872e-07	1.0324e-06	None - Full; RDI - Full; None - RDI	106670	156471	189420	259945	189100	244382	84633.1	112703	144992	145252	137712	142834	198056	120788	102389	107170	176511	115978	224676	324306	304633	247290	138031	147140	103643	99931.5	202362	124683	78847.2	115351	208934	347165	58782	69632.9	149081	77731.8	200140	139523	270.225	159.659	124367	137618	204937	165621	137740
M136/ 1150	16.768	3.2044e-07	1.6948e-06	None - Full; RDI - Full	107008	83002.3	155288	138506	28949.5	154596	103731	105089	52006.8	94321.4	37548.3	43552	51431.4	56288.7	53903.3	61723.9	43655.3	47117.7	122293	73488.5	74070.2	114756	38473.3	65267.8	77737.3	52772	82905.2	78578.9	51309.3	79294.5	87496.7	74274.8	109054	77419.3	26164.2	25684.9	39118.4	48492.5	0	0	58577.9	63637	88459	87283.3	66683.1
M97/ 1850	21.888	6.0607e-09	1.595e-07	None - Full; RDI - Full; None - RDI	107157	244310	287007	424483	218057	384833	112954	168853	163788	237339	222993	210346	303140	189372	169679	169035	281187	181584	366348	521149	523754	408617	214986	240416	154678	147495	313217	195578	103771	140194	289982	575499	52087.9	99058.3	224665	102409	293710	199761	656.721	471.877	181940	198415	311038	262621	212007
M74/ 1330	9.3069	0.00016482	0.0002802	None - Full; RDI - Full	109156	87195.2	125062	79973.3	121067	61441.3	113530	81648.3	115930	69568.3	80187.1	74702.6	119441	72621.1	106158	60595.4	98564.2	85399	112540	80533.8	92758	93715.1	62272	71289.3	66058.9	78306.9	99011.4	82678.7	143455	143463	187223	139911	152449	136159	143606	142399	177500	154698	1794.98	1072.12	153314	131086	131937	145697	149606
M136/ 1180	9.4172	0.00014963	0.0002562	None - Full; RDI - Full	109322	41974.3	177399	95777.2	0	134906	119593	56594.1	97284.7	43448.6	38994.7	1885.44	56721.1	26959.5	45502.1	38552.3	44432.3	32313	146524	106821	107177	117948	59761.3	48382.1	59445.1	54340.5	106910	103736	83544.4	78199.1	127127	101055	137319	118436	24618.5	14802.6	51431.8	49962.6	0	0	87940.2	86693.7	78290.6	50964.7	70609.6
M101/ 2420	6.1286	0.0028444	0.0040659	None - Full; RDI - Full	110383	126178	146307	326451	99603.1	158042	25983.9	36414	14677.2	39011.8	85586.5	46107.8	121584	100713	69964.1	51155.7	84563.5	58504.5	252582	179393	121721	154068	63851.7	46978.7	23599.2	32523.4	18344.8	23928	196265	34445.2	141424	190335	35914.9	5657.13	154259	58173.3	89304.9	39655.7	732.061	461.825	99083.1	106565	16675.5	45875	148279
M41/ 1330	7.6518	0.00071542	0.0011056	None - Full; RDI - Full	111503	39908.5	156983	138112	149636	141658	86995.1	90722.5	90875.8	120839	128776	48316.8	106828	95955.5	17077.3	27806.7	86705.2	82323	176259	250252	119221	185541	112290	129135	35037.7	51721.6	77021.4	63892.2	171385	159953	223968	172832	91408.9	99098.4	77389.5	69321.9	73403.4	141374	2346.33	1229.76	230677	245931	180852	173415	204628
M159/ 1880	14.825	1.5411e-06	5.059e-06	None - Full; RDI - Full	112636	207156	107429	132639	37664.5	50371.5	151079	75108.5	194839	177594	177854	107948	67756	81145	259458	207829	107210	200026	128921	19864.1	32809.1	61826.4	110435	123234	239481	138246	29296.8	177437	113880	98531.1	29020.6	20811.2	96454.1	84904.1	42500.3	90177.7	25917.1	60839.1	0	0	17746.9	28977.3	43465.5	38873.4	28365.4
M60/ 1330	11.931	1.7149e-05	3.9244e-05	None - Full; RDI - Full	113036	88224.5	210979	192701	193515	197941	106089	102390	113050	101508	63485.9	54804.1	103158	108506	16772.4	52085.8	89486.7	77936.8	275261	346136	242760	239716	171954	163874	71767	78704	84738.7	77609	205338	197692	288771	247249	85596.3	77242.6	109779	106527	154468	172003	1167.55	701.102	325708	357005	234514	236798	304073
M71/ 1660	15.926	6.2986e-07	2.4375e-06	None - Full; RDI - Full; None - RDI	115456	117837	77809.4	81840.4	126818	140200	73809.4	80675.8	78799.3	143292	156572	140072	108223	79860	104538	98289.7	101858	71643.3	123573	69002.3	66376.3	69349.9	60029.1	64151.2	78990.1	41800.8	151270	127107	96745.8	103874	85614.2	78486.4	89480.5	106619	119183	84321	89622.8	83152	598.939	426.01	65484.4	65845.8	119604	115591	104961
M165/ 1790	10.657	5.0973e-05	0.00010068	None - Full; RDI - Full	115531	133385	290776	310471	153973	170856	101934	122852	98201.7	105188	38833.5	45414.7	81740.1	90307.2	38839.6	35031.5	74354	71800.4	700641	533897	356088	376844	209504	205433	79222.2	78487.8	47957.2	59125	269190	266210	381771	344806	37900	39532.1	79400.9	77691.3	132656	122734	5212.25	2207.67	646364	621240	327404	338003	741961
M158/ 1640	14.034	2.9507e-06	8.3603e-06	None - Full; RDI - Full; None - RDI	116738	142410	83953.9	113407	144436	223528	80297.3	78525.1	188925	186676	239779	184144	281010	114433	163158	146383	187378	99235.1	88612	105567	85314.4	109686	60157.8	60982.2	91271.9	89310.7	386423	222258	48858.7	48736.1	54078.6	93393.7	127200	123730	217205	97717.8	211327	129505	0	0	39817.7	40170.6	118123	98403.9	26949.4
M101/ 1330	11.866	1.8115e-05	4.106e-05	None - Full; RDI - Full	117063	96008.3	233344	196996	223697	218398	100711	93744.3	132735	74554	59214.5	51361.6	116430	87965.5	11550.3	31510.6	87051	60723.9	290878	394331	254484	236338	141324	180758	4462.35	82588.9	44496.9	89290.4	231436	219346	325251	279929	91386.6	90480.2	117830	117120	169303	193292	1371.27	600.323	373366	400856	249552	263356	349235
M77/ 1820	10.062	8.5288e-05	0.00015614	None - Full; RDI - Full	117993	95721	154574	173583	114099	94396.2	59006.5	83682.1	96612.2	83370.1	103096	65737.8	87371.8	71530	61225	67466.4	65350.5	63338.3	327257	290624	224363	215907	91395.5	102056	66464.1	97354.2	40997.6	56434.3	152798	99768.4	287698	249941	47580.1	64221.2	71565.7	54303.7	75975.3	68463.2	4442.12	1882.57	1.2085e+06	1.20428e+06	110763	114595	932369
M95/ 1640	20.227	2.139e-08	3.1818e-07	None - Full; RDI - Full; None - RDI	119166	160544	20960.9	27582.1	185623	304770	89251.6	113746	217728	250967	293143	229132	361153	148516	228004	194657	252162	122819	131076	140040	179991	155377	77758.2	77338.6	129619	119972	591962	294491	47413.9	17347.2	38627.9	154922	123890	167231	252623	126074	260302	150124	387.6	33.882	49982.8	85918.2	154192	141923	53180.3
M102/ 1850	18.439	8.552e-08	7.2692e-07	None - Full; RDI - Full; None - RDI	119566	180664	216458	308281	204060	285919	96242.8	132466	149446	166611	171197	166753	239287	140973	118233	120417	207061	134188	259204	388437	361798	291145	163347	171358	122369	111556	238161	142337	104483	131265	246741	413208	75343.9	82491	178038	97345.1	233612	163967	63.1612	173.647	143399	157049	241107	188473	159042
M111/ 1880	15.617	8.0857e-07	2.938e-06	None - Full; RDI - Full	120433	209438	109066	145664	48634.2	70708.2	148855	81473	195227	183647	177598	108116	70379.7	86412.3	257021	210986	112955	200430	139080	38114	52635	75631.8	113168	125076	240601	145284	32084.4	176207	121017	105791	49172.9	32503.5	103110	90147.1	48734.9	104250	27115.4	64113.6	158.424	0	25187.3	36832.7	61189.3	55337.8	33607.2
M84/ 1560	13.603	4.2175e-06	1.1406e-05	None - Full; RDI - Full	121924	102442	100159	87190.8	121149	101886	88937.1	90374.1	114009	97770.1	107098	89020.5	59582.3	66310.9	71556.2	72536.2	78579.8	65741.1	177631	107379	80268.4	95249.2	78406.7	74642.7	54560.7	57577.6	64511.1	91173.7	119596	115960	124738	105579	77533.4	73730.1	76230.9	85327.4	62637.4	73007	2789.95	925.656	117573	111682	112506	123742	178137
M44/ 1580	15.252	1.0875e-06	3.7511e-06	Full - None; Full - RDI; RDI - None	122182	17171.4	178388	104150	231922	72104.4	68467.8	185449	124138	151841	77513.3	91246	102231	184018	40262.6	69021.4	122999	58292.7	149056	124248	139875	196373	171710	111020	28225	96054.6	48187.4	117726	205458	103089	201940	49432.5	81746.7	91904.5	90982.3	69201.1	54015.1	65080.6	166460	64641.8	125185	172294	183799	173584	139579
M153/ 1770	3.3096	0.039561	0.049555	RDI - Full	122219	11366.3	95725.8	50788.4	78439.5	36803.5	28383.7	67420.4	72324.7	86810.3	245692	57409.8	133268	96723	19967.5	114229	73861.9	98640.5	48162.8	127012	96634.2	125674	19310.3	126681	18148.7	170550	87263.1	96620.1	214560	120524	47390.6	19199	110596	92774	85467.9	102243	47337.9	181372	5966.83	3725.61	45545.1	173937	165116	228925	173698
M56/ 1680	7.1673	0.0011063	0.001677	None - Full; RDI - Full	122220	105401	84061.5	85877.3	121906	112649	79827.2	85749.3	98403.4	108523	164693	172054	78565.7	90251.4	97038.6	100908	99377.9	91309.1	236492	221119	141747	145241	115532	110434	68901.1	76691.1	88862	97298.9	159235	144431	137398	121246	90172.4	89224.7	102664	99365	87823.2	88871.4	15110.7	5723.78	188471	176618	138731	145011	227520
M207/ 1330	3.6495	0.028642	0.037149	None - Full	124582	72508.7	123874	71421.2	99444.2	58346.1	120581	80756.2	80927.6	75610.8	165206	71694	133897	81809.7	93893.4	74520.6	99333.1	85658.4	87058.9	0	87843.6	82449.5	63505.6	80852.8	63811.9	63945.3	95945	92127.4	153154	134788	173117	118651	146792	131584	133235	120051	147464	140550	6547.09	4584.68	111993	115699	118315	141308	111479
M41/ 1670	4.491	0.01296	0.017426	None - Full; RDI - Full	125352	68303.6	279201	309077	273732	176186	125308	158919	171384	155079	70342.2	153946	99760.5	128184	74722.3	75700.7	106446	97819	458780	494821	342318	334476	153101	202231	182252	68560.8	175261	106095	225467	193489	402058	280657	82036.2	107404	114733	83381.6	263451	123354	108323	32938.5	1.00751e+06	1.06138e+06	267303	269806	625180
M71/ 1100	9.1882	0.00018292	0.00030766	None - Full; RDI - Full	125949	213956	230736	236885	204886	338017	139092	153610	148480	126955	135301	105181	101267	123776	177859	99845.1	129526	118773	683861	367047	369377	373617	185223	174007	202240	132068	106294	116977	169612	162813	355232	565559	94639.2	99849.5	219278	224777	252128	153869	5636.54	5836.24	1.06949e+06	1.1645e+06	213343	201472	1.13454e+06
M58/ 1440	9.9397	9.4827e-05	0.00017098	None - Full; RDI - Full	126267	108998	73701	70711.6	102093	118806	98205	97006	202035	174209	277166	237938	175692	155221	256660	238091	141862	115869	59182.1	86599	57897.2	52618.9	56957.7	51767.6	110608	118071	292023	215248	92910.2	90015	46127.7	49309.3	242530	234380	232896	217929	132324	117739	280.666	215.914	23525.2	23241.7	186488	175737	23891.4
M106/ 1720	5.3126	0.0060295	0.008319	None - Full; RDI - Full	128648	268898	60607.5	161672	34179.3	223767	146195	303071	208248	412688	165625	348584	137948	263950	249755	246220	193997	172864	103243	124254	90369.7	104178	190366	166916	280771	253817	184747	193334	161478	173453	117424	109345	216305	231494	204077	184317	180510	164628	2080.75	422.905	46493.8	79666.1	111955	101185	74866.5
M113/ 1330	18.227	1.0095e-07	8.1444e-07	None - Full; RDI - Full	130704	103316	238764	269599	276305	281467	147085	135036	144747	141992	80565.4	49825.7	147527	157552	10443.2	42306.9	111375	100327	391910	505435	351742	350567	243916	222520	63383.4	112939	120022	107291	215094	276973	342910	353224	28989.6	104783	122234	126259	218500	222858	674.61	194.335	446050	518305	338060	315415	442474
M119/ 1790	11.028	3.7027e-05	7.6298e-05	None - Full; RDI - Full	130885	138013	295396	320578	162812	180469	111796	130537	107599	111759	46564.5	53466.1	72952.9	98196.1	42014	42009.1	78513.1	73618.5	684696	532693	346053	385497	213614	216403	58140.8	84602.6	56581.8	63275.3	286092	277744	395126	356400	46345.2	41035.2	80546.7	84023	129110	136097	6226.54	1363.3	647429	628143	309385	344892	734675
M71/ 2260	24.141	1.1367e-09	7.4121e-08	None - Full; RDI - Full; None - RDI	130937	240237	148313	315434	172472	306254	77827.9	199926	94949.5	194082	104861	141450	141047	235156	106107	108278	188976	159557	316797	380888	352149	269574	258238	267283	173969	179000	200857	173949	135027	198270	210909	355764	172832	228357	176654	174350	241549	223088	896.611	3995.35	133643	246523	258359	234249	203267
M69/ 2060	18.487	8.2327e-08	7.2692e-07	None - Full; RDI - Full; None - RDI	134708	331796	362087	588849	303151	497093	172630	275529	266465	192481	377612	176464	158108	198724	270280	101634	180238	193074	551069	778253	661988	493377	400924	413109	269875	261346	169612	104082	162734	290447	473723	952187	173721	225928	175680	222455	266092	230995	1424.95	2261.84	237076	343234	550609	547882	314806
M47/ 1580	8.1589	0.0004547	0.00071907	Full - None; RDI - None	134765	21596.4	191541	109523	275824	72960.6	61234.2	223478	147463	153478	58551	79061.7	111241	204518	21366.5	75638.3	111983	49461.5	159141	137873	190309	237211	207809	116999	11945.7	90067.3	37206.8	98312.1	255989	99053.4	236847	67206.5	75537.7	95453.5	91786.4	85086.1	47180.4	61720.2	180811	51920.7	153064	211104	215300	192364	196461
M41/ 2280	20.289	2.0398e-08	3.132e-07	None - Full; RDI - Full; None - RDI	135890	132363	157006	267940	85729.7	190624	54679.5	60234.9	144190	69932.5	264998	266121	86067.6	114420	156083	52405.8	109348	99445.3	296667	404084	257720	211174	156296	177911	61196.4	89379.2	84431.9	60501.7	101162	116848	265251	411801	18913.1	97680.4	100131	19353	139341	107845	3070.65	6870.88	180931	287113	216916	198318	204318
M211/ 2060	16.554	3.8019e-07	1.882e-06	None - Full; RDI - Full	138255	308446	384276	555079	332442	470242	163308	246537	140750	181820	120259	147202	158627	183791	75003.9	85257.6	163990	172967	513242	756249	621293	458397	367247	378393	239826	233250	154843	122600	211246	284411	501191	928008	169916	201921	164292	208139	267680	217364	1820.38	2469.17	249672	326027	515156	515499	287308
M85/ 2200	14.279	2.4108e-06	7.0835e-06	None - Full; RDI - Full; None - RDI	138387	252108	71482.3	257449	79487.9	186180	197421	346383	141084	409332	317242	447712	177958	337689	671068	429979	386877	611782	160419	65444.1	115237	260070	421897	347242	463813	441790	186315	426173	399470	10971.1	4354	2310.78	13038.2	7085.31	46593.3	31618.4	7575.07	10398.2	227.576	0	3139.47	2834.56	953.206	615.162	1324.97
M69/ 1820	12.757	8.5413e-06	2.1398e-05	None - Full; RDI - Full	139128	288474	123570	198817	31693.1	135432	93323.1	169435	145482	280523	172674	299291	85195.3	211259	189151	202012	74089.2	168234	276793	115134	70938.8	113233	88667.9	105796	181845	197505	41540.8	106159	140223	168790	112633	100827	63308.2	77271.9	132009	187898	119288	144256	1088.51	313.48	178043	202621	145646	183141	323771
M61/ 1540	19.807	2.9543e-08	3.9062e-07	None - Full; RDI - Full; None - RDI	139559	195172	208305	442144	305115	597160	121922	166225	175179	270049	136371	146615	202708	139898	81993.5	87402.7	165324	102270	481155	512372	463506	548573	170156	173905	98254	120295	326561	246965	92049	92747	124837	183845	56431.7	62397.6	78418.6	46530.7	140024	113701	804.653	379.897	132789	172220	102974	91439.9	126188
M228/ 1850	17.876	1.3306e-07	9.3139e-07	None - Full; RDI - Full; None - RDI	139805	214582	269893	373995	236566	347164	110947	152145	198424	196748	201364	195015	280483	164586	137787	142794	243702	155865	312322	476215	437235	352036	191720	201375	141587	134060	283362	165519	124643	150394	292876	515412	85087	92217.9	211201	112126	279482	191381	242.425	256.2	168895	183351	283879	220685	187873
M61/ 2060	15.41	9.566e-07	3.3236e-06	None - Full; RDI - Full; None - RDI	145826	300066	378645	528229	328733	456975	159055	241076	143171	317011	121061	156153	179220	194818	76781.5	100078	166779	182488	487127	694080	585471	440102	353058	373259	229581	236942	150439	122712	221620	278088	486561	850202	205992	200814	177973	205261	276586	223070	1657.42	2371.53	247056	317595	486182	492295	277451
M102/ 1220	12.077	1.5148e-05	3.5172e-05	None - Full; RDI - Full	148192	118846	72188.8	58063.1	81447.9	77836	105270	106348	242661	194927	191263	300576	143447	104249	282097	233796	165550	151241	60799.5	65721	55656.2	60857.4	64420.8	79285.2	112335	163.689	195133	122979	67612.9	104308	56656	57173.3	195664	133591	184646	198632	95542.8	108143	388.343	82.458	52371.4	57773.9	120197	123593	53412.8
M70/ 1560	13.41	4.9526e-06	1.308e-05	None - Full; RDI - Full	148269	129846	127741	110755	140928	139977	109205	110479	143381	125145	128590	121587	73440.8	78284.4	88462.8	88536.8	104236	87424.8	228622	139480	118486	126239	97985.2	81546.2	66036	75268.5	88833.8	118644	124084	130704	132058	139166	80315.3	83197	101034	102698	84636.5	88681.4	4367.26	677.778	154736	153531	152796	151920	227560
M172/ 1440	12.434	1.1212e-05	2.723e-05	None - Full; RDI - Full	148348	126512	73236.9	75533.8	109370	140614	110241	108254	226574	208458	352472	281657	202444	177931	321093	291529	159114	134715	63181.8	84092.8	58894.3	45616.8	49185	51334.1	119146	126262	357896	257741	101712	97347.4	44465.5	52374	302618	292508	287797	261194	153283	119028	0	0	19388.1	22472	219301	212399	21479.7
M57/ 2060	18.887	6.0276e-08	6.1046e-07	None - Full; RDI - Full	150355	334380	43672.9	661092	422924	573566	192981	316218	171380	235850	197992	191632	167733	249652	90576.4	93650.3	202640	216825	632234	888804	744680	563317	456255	433124	302502	292106	200844	140574	31901.4	26356.6	509153	1.01297e+06	147613	211621	183674	238036	239694	242327	2600.14	2055.24	294105	381448	601079	603394	371424
M41/ 1540	10.577	5.4589e-05	0.00010563	None - Full; None - RDI	152027	226832	229970	465187	338343	688178	127552	169421	202944	283998	107679	146260	168126	113611	91813.4	50684.3	109627	88296.4	503922	511714	499915	566739	181095	187156	105337	114299	316069	279090	100741	96166	130466	226479	67556.1	64809	124936	57331.8	167105	125527	64568.1	2750.63	162202	201377	97539	108146	153759
M69/ 1100	13.394	5.0169e-06	1.3121e-05	None - Full; RDI - Full	153659	245117	279398	287736	220875	435448	169581	183078	141631	158723	163114	116310	113017	152189	219970	119574	159457	124228	903230	454542	465529	465596	235332	215019	251781	157158	125114	130703	205485	177769	432307	675507	109196	110490	249264	261137	260612	178846	4552.55	2092.19	1.31949e+06	1.4219e+06	259267	238117	1.47906e+06
M105/ 1820	14.7	1.7064e-06	5.4512e-06	None - Full; RDI - Full	155195	178655	305096	343724	189283	202943	141959	186643	113139	144870	115396	154652	111599	151670	121537	140634	126384	117571	793273	637720	471478	496975	187507	197065	162616	164532	84116.2	121853	184147	202611	433804	410038	66502.1	63759.9	106009	121386	136469	142044	6639.01	2944.37	2.61617e+06	2.58969e+06	243895	254307	1.97153e+06
M46/ 1450	5.1374	0.0070932	0.0097022	Full - None; RDI - None	156318	62872.2	471936	455556	556860	249571	252805	299615	292943	194291	123645	70679	241579	289846	32268	116710	184012	142185	543721	514865	530681	466562	487590	382116	77756.6	386640	138269	259579	418256	343608	447797	400679	130714	246268	129313	119608	131334	311157	411349	302499	617966	394569	411301	328054	583287
M83/ 1850	20.79	1.392e-08	2.5485e-07	None - Full; RDI - Full; None - RDI	156324	321684	357453	546201	361538	524211	166913	245899	279150	296677	267995	297377	362318	262448	209117	231575	368163	235057	470230	688973	665596	537733	272348	311942	194953	216071	432774	259902	74810.7	207994	360915	735220	101711	91629.7	314920	157278	382972	267448	865.187	722.727	227287	268871	432369	342537	295004
M44/ 2900	4.0998	0.018716	0.024931	Full - None; Full - RDI	158009	32073.8	104753	100021	78210	98095.6	100607	109987	100629	23887.3	16362.1	111029	179904	66243.2	92963.4	186868	100943	88061.4	71180.8	63997.9	133943	113892	155477	82436.7	97726.3	96279.4	92511.5	95086.2	103513	97332.5	188862	98122.8	99776.5	99710.1	199267	128912	103811	156391	81241	81477.7	99005.4	87694.5	78490.6	180698	144495
M63/ 1790	11.114	3.4408e-05	7.1833e-05	None - Full; RDI - Full	159705	166643	366688	391083	201767	218670	130148	146913	132322	138757	55812.9	56442.7	102901	110313	49619.2	45997	98967.1	94395.8	843409	645243	435126	472826	260561	263920	101645	102198	63520.2	74421	345568	339914	479248	431194	58214.8	53106	103226	104231	170930	159563	9771.95	3194.73	785740	756823	411767	421052	891859
M60/ 1540	16.955	2.7617e-07	1.4771e-06	None - Full; RDI - Full; None - RDI	160315	232279	246980	488568	363025	718316	134264	183185	221891	310353	182294	203379	241754	183731	101758	113004	190794	110934	583107	595715	535740	659616	188972	194317	117065	152467	383789	298872	104747	106357	142894	226536	59723.5	84562.1	84020.7	78029.1	166664	127627	34706.3	3908.07	171318	215539	125273	100784	167229
M109/ 1440	10.874	4.2256e-05	8.5591e-05	None - Full; RDI - Full	160625	147216	85849.9	88184.4	128574	161187	127377	123741	273700	239186	396701	331823	231991	207370	367937	332965	194011	156204	72193.8	106545	70601.1	61122.9	65243.8	59873.8	143486	153461	423703	297025	91022.8	110415	44601.9	59747.3	332522	332302	298725	286338	170034	146238	0	0	22843.3	26337.6	256882	242404	23688.9
M56/ 1850	19.895	2.7612e-08	3.7855e-07	None - Full; RDI - Full; None - RDI	161070	212227	236702	339216	236626	298192	117719	160666	230873	263800	265061	257082	272355	201362	195658	198012	261484	176819	285948	405853	385111	308229	189512	190331	157026	155835	282429	203667	104592	154085	258667	428948	87327.1	139088	226095	131722	247151	190288	918.598	360.204	186048	211189	269319	205057	191786
M100/ 1220	12.769	8.4565e-06	2.1298e-05	None - Full; RDI - Full	161579	135595	82723.5	76556.9	40641.9	82489.7	105485	111090	255670	205628	173390	310440	145638	98396.7	292084	235787	170658	155944	68154.5	71399.5	61437.7	62327.9	65966.5	87251.8	120175	138711	175691	123729	71328.7	109647	81261.4	68250.2	212112	135044	212136	209802	105065	116193	48.4175	38.3643	58674.8	61298.7	128287	133105	56852
M88/ 1950	16.393	4.3279e-07	2.0595e-06	None - Full; RDI - Full; None - RDI	164188	211556	190931	250539	193353	193183	117774	154111	158240	167717	129492	233441	97343.3	118322	76110.4	102825	65020	103562	207444	289707	221989	178927	109472	133262	91482.8	91889.9	30804.9	66463.3	92521	111899	210961	341068	47777.2	51197.2	61400.2	70885.2	76991.5	75515.4	561.808	389.384	149657	162144	165009	159886	153207
M77/ 1180	3.4252	0.035439	0.044864	None - Full; RDI - Full	167020	67347	265650	138854	9864.01	192467	181195	84057.7	150828	72482.7	69858.8	27745.3	9228.95	44105.4	65358	47333.1	43850.7	46251.8	155895	156073	163721	158732	96259.3	66702.6	75205.1	4804.23	153185	9379.08	136677	115011	177749	145984	200250	174265	39253.5	33229.5	77245.9	76039.5	2595.9	979.768	133161	129588	118010	85018.7	97952.6
M71/ 1850	19.307	4.3503e-08	5.3096e-07	None - Full; RDI - Full; None - RDI	167529	263463	315148	423425	308843	400809	140095	197181	246265	246684	255288	242361	316817	205962	186036	189367	299685	200337	370871	541647	507727	407010	240249	244774	180086	175271	340386	216293	166317	191383	332855	572687	115163	130046	259414	150927	331313	234516	838.767	403.578	213648	229305	342788	282044	229045
M84/ 1660	14.684	1.7288e-06	5.486e-06	None - Full; RDI - Full	168661	154947	130662	112946	154786	156358	109372	105258	149902	137371	111829	95919.4	87595.8	87901.5	75543.8	68764.1	87008.2	83650.7	224965	116438	93689.3	112554	102198	99868.6	81433	81182.4	69675.2	90621.1	181073	178234	148222	108061	94589.5	69857.6	375663	97931	97928.7	101458	1953.5	187.25	125179	112718	139353	152055	183469
M71/ 1440	10.888	4.1779e-05	8.4987e-05	None - Full; RDI - Full	169003	152409	100636	102141	136783	165938	132520	130994	271241	239585	385176	330560	241260	215227	360791	329253	197917	159117	92346.9	134823	93240.7	70576.3	77011.6	73329.5	151820	163752	407551	300840	124382	121083	61646.2	81841.6	337429	320352	320080	290228	179648	158215	242.793	0	26763.6	30884.3	257540	246885	28679
M145/ 1440	13.958	3.1427e-06	8.7996e-06	None - Full; RDI - Full	170883	145011	93035.7	89759	127915	159113	130008	124388	276586	240302	401845	337367	236734	208612	369052	338295	192522	151945	74843	107082	69746.6	60170.2	68599.3	65552.1	144405	155104	424018	302871	119999	114190	55069.1	60906.4	346702	335519	326797	294205	176306	157075	0	0	26054.4	29391.8	255945	243880	23365.8
M84/ 1430	8.1855	0.00044403	0.00070452	None - Full; RDI - Full	172133	123813	158068	132573	151182	96962.8	110744	111597	615962	132621	152275	111260	87644.6	93935	106038	107373	104781	85880.7	236047	164664	145078	161065	99455.2	86888.7	84156.5	353048	101963	128566	173210	137472	170483	112683	105907	144406	94952.1	104429	81473.5	103935	2295.93	727.053	191688	9659.25	142347	122674	219999
M45/ 2060	12.015	1.5972e-05	3.6727e-05	None - Full; RDI - Full	172205	172174	151825	207882	130666	186494	115840	131224	253609	293518	338181	362785	150040	161496	266088	264736	132765	130237	198203	136938	227050	100447	135867	73818.8	125847	143055	164793	196790	102408	93751.9	96429.5	118265	162362	136885	174230	148557	113784	101930	7341.16	6463.82	109220	139961	190643	193340	93956.6
M70/ 1540	17.811	1.4007e-07	9.6625e-07	None - Full; RDI - Full; None - RDI	173222	234729	267935	534958	371406	777071	147834	155513	212285	312517	160713	157466	218804	131794	88707.3	71181	141827	78531.4	559116	631954	529460	683961	161929	170204	82472.4	124576	351926	278652	101336	104436	147261	244621	64804.8	67038.9	85085.1	39045.3	177894	131227	960.075	342.152	149461	181454	85039.9	15400.7	162036
M46/ 1540	4.0978	0.01875	0.024931	Full - None; RDI - None	173539	31563.5	193798	132081	308199	94096.1	113943	300384	148359	289035	14076.4	180425	127833	311108	44320.6	106803	216611	60285.9	139670	120538	178602	198686	275956	153410	4262.5	161916	16243.9	154310	302803	94532.1	261588	50558	105416	147546	97315.1	45376	38514.4	67470.6	152320	28499.8	123733	157113	238755	206029	114847
M97/ 1660	13.66	4.0223e-06	1.0941e-05	None - Full; RDI - Full	175412	169237	147079	137039	172233	173353	122357	123617	160640	148795	118513	103343	92983.7	96056.2	75321.6	71946.2	96242.5	85317	256775	133312	155934	129197	113602	112220	92744.8	88240.7	76973.9	103008	189606	174467	157590	132571	89507.6	90739	108071	103767	115578	118543	1594.7	415.767	138047	126958	150376	169033	209181
M143/ 1850	17.937	1.2683e-07	9.1472e-07	None - Full; RDI - Full; None - RDI	178124	284800	348308	494421	359344	454368	151784	209201	241878	263685	257332	261355	367063	220603	182924	186180	323665	208134	411651	624456	575646	467437	256976	270478	190557	180973	377005	224005	172260	192194	393945	671087	116190	124645	270930	152968	370613	252780	119.693	161.92	217294	245666	377885	291916	250346
M89/ 2060	16.323	4.579e-07	2.0758e-06	None - Full; RDI - Full; None - RDI	179427	417361	522543	739613	447882	634186	199659	336599	186038	251412	150167	198814	226754	258179	107050	122100	224946	222734	685864	976900	819568	616909	490824	515398	325052	318272	213681	176755	273940	375995	662175	1.1815e+06	229893	272909	233842	281764	349258	298786	2965.47	2768.35	330994	436873	679490	681677	391165
M71/ 2200	14.486	2.0346e-06	6.2482e-06	None - Full; RDI - Full; None - RDI	179781	332785	101424	347010	107781	251010	258357	466601	197832	546659	428475	600205	250148	453808	898297	576344	518058	815776	215367	77222.3	156930	347414	566097	461105	621726	589501	250818	570691	538279	19878.5	4584.28	4812.54	17968.8	11659.1	11765.9	42539.2	9944.67	17561	156.8	86.4132	7978.38	45672.1	2573.61	1614.83	28872.1
M98/ 1660	15.542	8.5958e-07	3.0764e-06	None - Full; RDI - Full	185247	157924	145280	133312	169298	165389	117122	118203	166545	144471	115514	105871	92288.9	92135.4	76575.6	71119.5	91858.3	87165.9	240828	123541	102137	124169	112998	107617	89119.7	90217	73165.8	95478.1	192289	193621	165077	116550	98880.3	87996.6	103058	106433	113262	117571	1743.62	201.871	136606	123917	143225	160965	193845
M77/ 1770	3.5085	0.032744	0.041898	RDI - Full	185956	40247.7	162145	108185	136505	120506	55203.9	107025	162535	139545	372002	99656.2	213155	163532	59672.1	189056	123431	157566	103421	198107	139437	197903	41888.4	192495	51977	265792	99462.1	174990	323463	212649	85771.3	75453.3	184579	148541	190781	107668	150193	253496	11621.2	6699.3	99254.9	154534	235415	344584	246332
M41/ 1150	3.4168	0.035725	0.045106	RDI - Full	190090	53725.9	178131	136634	91675.7	129727	167687	170003	209724	218043	454598	202414	301376	296877	43084.1	235779	246253	208074	90634.7	99380.2	164630	166539	189483	161949	34551.6	181261	164962	238261	221524	175143	170638	130225	186587	22787.8	33943.5	38338.5	33288.7	171523	8004.37	11197.3	70207.8	93612.1	200579	174197	61550.8
M73/ 1540	16.149	5.2641e-07	2.2372e-06	None - Full; RDI - Full; None - RDI	190937	286588	288233	582176	439236	858514	162745	204274	258079	353695	180237	183073	275572	187905	120950	97833.9	205433	126006	683057	706662	628470	760914	219839	227439	139082	161092	452774	332859	119449	119501	159017	259948	62525.2	72870.8	94875.9	67537.8	209246	146304	67215.9	2126.1	183763	234723	138947	119003	181162
M171/ 1640	14.989	1.3475e-06	4.517e-06	None - Full; RDI - Full; None - RDI	191651	227353	133773	185726	238809	397213	124582	139776	302864	305761	395110	301552	474944	196281	286374	253843	332678	169233	144015	168912	177702	177339	98605.1	104339	153912	151775	778158	369395	81747.8	86118.6	88253.2	153232	211097	206702	351085	163230	339492	212954	48.4019	0	66862.1	69955.2	203223	160572	48141.8
M141/ 1540	18.941	5.7803e-08	6.0311e-07	None - Full; RDI - Full; None - RDI	192969	283453	299086	609852	441654	902750	163868	214658	251941	364341	172262	183571	283972	194537	115179	98810.5	208672	127644	718158	749144	665323	818459	221012	232654	138651	154538	467045	350413	111582	120890	163681	268208	67617.3	72219	95207.2	61148.5	202355	147748	34.1367	40.2467	187455	237257	136417	116675	187150
M87/ 1850	13.828	3.4991e-06	9.6834e-06	None - Full; RDI - Full	193602	177600	202925	200508	202707	155092	128657	134555	264079	273157	308648	327363	245341	168518	230316	282703	179238	174992	187931	298979	172798	190940	86528.5	99835.7	110018	139165	185864	176982	155427	148902	238220	304567	170113	172367	225351	157847	197476	158432	4117.87	898.844	204748	199290	216444	210067	154191
M40/ 1080	4.0548	0.019527	0.02589	None - Full	196972	108226	193779	181443	329961	176615	212132	253497	358309	286073	705325	297333	386992	187873	140687	227213	353553	279668	104823	74247.4	190576	164838	269831	256233	252071	88433.9	252767	267166	164525	211634	72134.7	80008.8	214931	409662	178814	175780	164268	218320	14367.7	3657.5	218740	241219	267936	224050	213561
M43/ 1330	4.4536	0.013422	0.017997	None - Full	198191	131664	287939	268631	321618	250456	164216	143838	203198	172546	214831	96026.6	171759	162123	39962	77234.2	140610	117129	329222	484965	266920	315005	166252	178289	70596.2	83483.3	83900.6	96792.3	315820	301283	420301	338048	136617	125024	167004	157359	205648	259803	11538.9	7953.48	478950	535667	352683	344332	423519
M152/ 1770	3.6071	0.029818	0.038464	RDI - Full; RDI - None	198542	24832.9	163078	86206.7	110832	57458.9	20746.7	110562	102081	139586	408428	100693	192640	167007	41723.6	175435	121213	170688	85130.4	178733	123583	184425	38077.6	203553	42552.4	274907	91613.4	177086	363896	233726	81090.4	33440.9	188645	150365	145983	102322	103029	286650	9929.47	9317.82	87420.6	303935	267287	388895	177491
M88/ 1750	14.409	2.1675e-06	6.5299e-06	None - Full; RDI - Full; None - RDI	200259	343678	162157	347336	154349	264364	134012	266971	242040	333692	229696	20335.1	144465	191640	141482	182121	120646	176973	208035	203630	211162	251669	177379	224180	186312	13895.4	67871.9	220666	75470.3	98335.7	95238.5	188425	12622.7	68570.1	83260.3	58916.9	120703	93632.3	125.873	61.0203	80778	85839.4	81477.6	66989.3	83638.5
M85/ 2100	16.055	5.6793e-07	2.3141e-06	None - Full; RDI - Full; None - RDI	200444	255581	181472	271914	123523	181112	297703	334851	160602	360465	560263	401712	282225	342757	789910	413856	372889	572745	323549	114809	169811	343558	522044	437782	537606	522126	189159	595383	598343	28212.6	8763.39	71502.6	26605.8	21444.3	39769.3	26255.1	10182.7	17398.8	420.702	165.481	125630	138786	2727.45	9692.47	125783
M55/ 1680	9.7252	0.00011431	0.00020378	None - Full; RDI - Full	202511	201124	149770	160805	239501	225262	148319	168254	192446	190232	291525	308534	151957	174633	182831	185330	187853	182232	405614	405004	270236	255816	209451	206384	124565	146444	170701	192456	281537	272347	241459	236593	166284	158026	184451	183492	161175	160811	27631	8176.97	326551	348347	265393	274315	434898
M121/ 1150	16.172	5.1685e-07	2.2366e-06	None - Full; RDI - Full	203670	151860	298604	273275	9666.54	298133	183553	206235	101612	174686	78526.9	87122.9	100599	107889	106127	116805	87810.3	87660.4	239805	142897	142428	213697	75117.9	126885	149278	102219	164322	150225	98269.1	153600	150219	145576	186292	154311	42180.7	37052.2	68670	92056.2	0	0	107390	119281	173703	163449	129785
M77/ 1130	6.7443	0.0016225	0.0023985	None - Full; RDI - Full	206574	49523.1	305154	130411	8960.12	163667	189474	87091.5	88344.9	62410.2	35297.3	28407.1	86357.9	26558.8	46950.8	32786.1	23462.6	49695.2	195629	118759	130354	161149	53360.7	73858.9	87498.8	46375.3	124161	80922.6	65505.6	118825	187362	135710	208116	51496.6	35441.4	31453.1	24370.7	71500.4	1497.8	537.604	111523	64216	74460.6	52471.3	89559
M87/ 2060	13.146	6.1716e-06	1.5879e-05	None - Full; RDI - Full	206777	202234	28218.4	32174.7	122195	23057	121916	143184	309599	376480	446318	485086	159859	178154	348979	335555	141617	132804	126023	30963.2	55731.9	85325.2	45813.5	44504.5	143373	139175	186861	241197	84338	81264.7	134825	213750	190661	160266	186705	174628	80704.6	82802.1	982.011	397.735	19541.3	93672	141374	151748	21642.5
M157/ 2060	17.276	2.1386e-07	1.2133e-06	None - Full; RDI - Full	211852	470167	591723	846002	509832	722018	251505	379069	215778	281489	185179	229362	242099	284355	115873	133512	249501	266898	784182	1.14752e+06	948084	700266	560577	580654	375271	363868	236244	191066	322348	436089	762375	1.40535e+06	255478	308086	248607	317089	406454	326244	1955.55	2496.88	385846	498014	781342	783456	439179
M75/ 1920	6.2135	0.0026317	0.0037846	None - Full; RDI - Full	212971	119503	150289	155478	160617	115011	169180	131195	204777	142966	176328	186215	167733	157128	135752	118408	140913	147710	122422	117642	128017	116019	78811.8	140482	115377	142880	122110	140121	218578	156443	175086	148060	168379	145956	156896	149145	145221	143758	16681.6	4576.33	155542	135910	162355	177752	160346
M70/ 2060	12.448	1.1073e-05	2.7167e-05	None - Full; RDI - Full; None - RDI	216354	464160	560802	768251	440107	632648	235181	316567	172114	231739	151902	180803	195224	179778	80254	109703	206104	258166	436283	13931.8	440941	13617.6	340790	440640	244003	219797	155588	130593	325296	427373	725375	1.31066e+06	236738	301610	217063	275211	394488	332336	4074.14	2698.64	379242	469747	605424	691463	385641
M73/ 1680	10.371	6.5227e-05	0.00012321	None - Full; RDI - Full	219201	280223	159507	219057	264381	240987	183160	223926	201089	248573	318012	381239	163624	240123	237432	240464	231211	238843	417701	433772	313516	330293	253392	290826	214211	197735	227654	238725	363887	358880	305635	289176	238226	228908	265810	256671	254654	251293	27501.9	9556.45	373914	356800	364305	366836	451150
M57/ 1660	15.595	8.2348e-07	2.9695e-06	None - Full; RDI - Full	219303	44518.9	172893	159143	184677	239949	137537	69068.9	162214	210241	196773	167846	133070	124341	136624	120095	152959	125726	295731	159429	133302	154451	127125	138447	129192	131664	170556	154587	197297	208151	139347	129328	112592	133424	154444	51238.5	131143	141108	3828.39	2422.23	387372	430348	198326	181529	270315
M97/ 1430	8.6789	0.00028659	0.00046879	None - Full; RDI - Full	222538	160691	218368	179871	175813	137268	148708	156107	223268	188478	213413	148481	131421	143642	133216	146838	148688	114371	347670	240003	224812	241648	152450	128480	116000	152190	155725	187607	24862.9	200486	201640	156304	148010	218558	133424	142661	96176.6	141259	3495.01	1207.25	260787	158194	198017	179763	288869
M45/ 1850	18.128	1.0915e-07	8.2471e-07	None - Full; RDI - Full; None - RDI	233596	278787	294463	372638	292829	342499	174500	215314	315727	304010	357100	374152	322547	258085	280928	308626	299111	228043	309242	453669	402090	345079	234305	227152	192492	207466	320562	254362	191953	203815	324346	458087	191051	198165	281412	189046	295593	232528	14045.8	8449.73	255250	265679	315956	279424	240602
M105/ 1670	10.196	7.588e-05	0.00014054	None - Full; RDI - Full	233763	240710	438115	454618	357097	358706	189895	225293	163555	194261	126679	135401	124590	146373	100800	109381	122379	129024	932111	714096	435009	472588	209926	214624	145694	149123	209539	248473	332311	340719	938925	844166	139482	136811	123715	135024	131389	137477	31740.1	18963	800985	786834	539913	563173	568738
M41/ 2060	17.64	1.6028e-07	1.0324e-06	None - Full; RDI - Full; None - RDI	235104	466015	575901	803935	506885	689455	270550	352793	229322	722993	191968	233774	241920	311352	542514	147233	222121	234746	618663	430142	830956	612618	460740	524697	327747	295407	370919	167406	335992	436086	744439	1.28455e+06	265227	314043	256753	314488	408399	340540	5163.05	6186.97	389036	491464	754136	757280	439764
M128/ 1680	10.184	7.6696e-05	0.0001415	None - Full; RDI - Full	236101	228436	159789	173699	240697	231928	163186	189645	200148	213998	342060	361960	165984	195978	214420	216292	211855	200924	469658	455784	280307	285922	235272	229399	140239	153278	184053	217762	323379	315663	270887	236602	187981	185337	209679	204131	183176	182773	31162.4	8529.21	348472	327035	275834	282999	465907
M83/ 1660	15.721	7.4325e-07	2.764e-06	None - Full; RDI - Full	236102	172938	193272	151359	218648	227412	149888	154003	208998	203907	144946	144617	121849	127236	95960.1	98879.5	121937	117158	315560	169296	151926	170713	151202	140530	119759	108422	93700.8	123560	159611	251313	155843	149904	100658	96200.2	140273	116635	140805	153616	864.848	354.94	157344	176753	204695	221188	259441
M44/ 1540	10.355	6.6128e-05	0.00012441	Full - None; Full - RDI; RDI - None	244421	48528.7	273127	194757	431032	130394	47570.1	408492	208944	397101	34188.5	253252	169761	400853	56894.1	173648	301650	81707.3	181290	167374	235365	274226	378814	190159	20214.2	221756	20832.3	210140	428686	133806	371458	80419.8	155525	209370	146845	69273.9	71454.5	99107.5	219596	64736.5	175782	217893	327315	284107	160702
M69/ 1460	11.182	3.2456e-05	6.8386e-05	None - Full; RDI - Full	244767	3726.59	293350	281253	345711	274164	189351	187431	244223	208177	142173	120877	149357	138175	92481.3	97378.8	150944	132916	571704	456272	308956	324107	230149	207207	115368	137466	114016	150435	267979	304117	364026	323799	77403.1	12800	154026	150597	144108	176216	25622.5	5232.37	461431	459334	344403	310825	685283
M102/ 1640	13.404	4.9737e-06	1.308e-05	None - Full; RDI - Full; None - RDI	246969	298717	179092	240064	309805	498516	168481	185548	387764	390653	500892	382554	597193	254436	366499	326841	426993	221740	190190	222067	233865	228814	131272	135666	203522	196766	942712	467359	107496	109124	116236	199212	272956	265416	444992	216872	427229	275885	152.577	0	84610.2	89542.8	266298	209298	65842
M128/ 1440	10.759	4.6678e-05	9.3206e-05	None - Full; RDI - Full	252058	215868	139236	133591	192041	239732	193900	189778	397725	352294	578087	488279	349836	303693	532854	488472	280728	225922	114807	157822	101776	97560.3	99397.5	99156.4	217675	226188	615186	445374	176923	172214	82873.8	89353.8	503090	478814	476386	433479	260475	230707	0	0	41927	46577.2	382830	363174	42678.3
M41/ 1770	12.083	1.5075e-05	3.5172e-05	None - Full; RDI - Full; None - RDI	252407	233628	161965	134359	158460	185788	148648	156152	247569	227393	144556	122475	130293	78975.4	102458	85313.8	137264	135017	110483	111549	107400	111541	83677.6	99497.9	97395.5	144560	134468	231936	167692	144841	161334	132225	171947	151708	106509	123916	76580.9	105734	3818.63	2215.31	128239	88282	172535	195137	164618
M45/ 1040	6.5159	0.001997	0.0029339	Full - None; Full - RDI	253502	140158	342102	200278	437652	175455	178351	248911	525343	546280	677667	170572	284648	408626	124155	216142	587407	291130	179564	192367	215040	180778	353724	326554	127669	354130	175129	426740	198302	172798	173435	140209	210117	216917	234316	154117	154494	397743	95630.4	72147.5	170625	189444	657260	350472	163028
M85/ 2040	11.247	3.0708e-05	6.5842e-05	None - Full; RDI - Full	253629	267469	434333	467300	322719	287718	247884	273274	291809	347194	149353	156812	177413	184850	134960	126000	179072	186389	996303	775673	511696	547024	249721	248703	199679	184500	196329	235564	322519	342303	563913	572852	132894	140894	159783	159472	193278	174964	23570.1	8780.25	1.22392e+06	1.26706e+06	375560	381806	1.10431e+06
M89/ 1220	10.493	5.8723e-05	0.00011181	None - Full; RDI - Full	255198	213575	129173	123175	143400	130885	170173	177948	401461	324500	301980	488391	232882	160684	458833	368425	267602	251111	109274	112246	97525.5	101018	106159	138249	190242	222147	276264	188687	105265	175201	127149	106780	340171	200460	334743	333141	167194	185564	729.621	147.698	95563.9	98576.5	203263	209282	90807.9
M79/ 1920	12.483	1.0757e-05	2.653e-05	None - Full; RDI - Full	255366	272028	229713	218732	229187	199608	216049	265228	293845	331165	261645	273117	185060	215230	204705	211960	208130	200310	262277	250313	206790	218496	242002	240117	223659	252108	192415	221284	255473	258690	143138	171351	170327	194851	197562	202573	148666	172767	20261.3	7316.6	232583	240146	221746	246390	217713
M71/ 2100	15.986	6.0049e-07	2.4034e-06	None - Full; RDI - Full; None - RDI	261560	337801	178856	369232	168964	253582	350952	440863	212857	472608	744178	534122	377975	459783	1.05706e+06	553280	499123	766962	428836	151360	224893	457122	699754	589658	706836	711469	253760	795302	769317	25424	8217.98	32375.8	30975.6	21609.3	49479.8	32838.6	11461.1	16950.2	322.681	200.79	35492.8	40670.4	3295.11	22060.8	42351.7
M57/ 1580	9.6616	0.00012083	0.00021303	Full - None; RDI - None	264533	55739.6	412854	258556	553323	157602	172971	451341	275863	348198	141167	199333	204746	453007	69207.2	140689	281562	104528	369938	314500	423988	493355	409011	240637	31687.5	213271	91492.1	212199	508806	214336	472865	152757	166543	196504	187670	122428	88468.2	158339	390512	101642	362927	455839	436772	422228	440504
M56/ 1640	16.189	5.0965e-07	2.2256e-06	None - Full; RDI - Full	264559	325785	192062	266178	69026.5	528160	184959	202374	436677	415630	520079	416829	623005	284558	387988	350944	457673	238241	216124	248415	262905	260339	164133	152211	220073	248196	976971	520344	108371	108075	119841	217107	276137	297159	471741	230527	446800	290811	27179.2	520.537	95325.5	95687	279836	236370	79345.5
M61/ 1450	5.1952	0.0067228	0.009222	Full - None; RDI - None	268467	104122	852249	818950	1.05125e+06	438500	446484	533031	509927	336632	131911	118210	377975	506806	50509.2	194763	320116	246682	1.05843e+06	1.00671e+06	1.1541e+06	936436	882076	687824	131444	685784	240012	458274	751912	611623	902045	819032	226497	428794	224135	210096	229130	554298	788890	536579	1.63754e+06	1.4664e+06	903626	802189	2.17443e+06
M185/ 1850	17.393	1.9491e-07	1.1667e-06	None - Full; RDI - Full; None - RDI	271629	418559	524717	721706	462942	670328	222044	298487	363907	351263	390541	378948	546221	313629	261091	264017	475768	300020	606837	922184	847635	677242	335342	393610	277171	252062	534582	327536	253800	297294	580271	996534	172427	180832	412172	216615	546055	378122	446.093	664.188	331337	358754	556332	436004	365326
M43/ 2060	11.21	3.1699e-05	6.7359e-05	None - Full; RDI - Full; None - RDI	276595	494372	733544	769993	566624	754353	328305	337183	260958	343270	988747	1.04173e+06	376110	238366	748275	738616	246276	245736	310523	349801	46069.6	279160	343089	480512	344942	386209	199179	542109	430094	517542	923930	1.58776e+06	351255	349939	339563	394981	486285	341306	11345.1	11978.2	475741	575737	127812	870548	500792
M59/ 1080	3.7972	0.024903	0.032565	Full - None; Full - RDI	284153	309183	239570	217879	302804	178351	274204	257392	549776	294430	567716	301408	290761	157231	287743	186648	356592	305302	50403.4	163133	195507	200756	145823	264885	294403	130966	276574	181562	364442	269422	248622	142940	305767	476809	235116	254397	300603	276049	43868.4	20591.8	129567	171222	304963	249664	54450.5
M84/ 2060	19.382	4.1045e-08	5.1414e-07	None - Full; RDI - Full; None - RDI	284420	333293	102878	177566	96683.1	181346	191897	225533	470274	583434	632216	688921	245175	279073	514646	489665	240035	60552.8	165288	250070	216629	166759	151407	124973	246700	244264	309425	384886	107835	89168.5	192185	213130	219101	225545	255014	229376	99127.5	119297	285.751	179.649	152143	213479	176176	262413	93402.8
M134/ 1770	3.7176	0.026851	0.034922	RDI - Full	287619	40533.7	231244	134379	189017	95433.2	175283	167298	181647	219622	572327	147187	314968	234835	63823.2	275394	185518	231795	136488	294679	242747	283578	56122.3	292580	101382	415326	241606	255642	505263	321906	126430	56528.7	256710	213279	231249	266512	187295	399860	17944.1	11845	224453	421242	354902	552033	394372
M147/ 1330	7.2046	0.0010697	0.0016268	None - Full; RDI - Full	290183	180271	287080	162501	307398	132810	299707	203727	308665	123793	364437	172374	299023	170512	237955	144419	187078	211404	171259	172666	173479	184871	78208.8	170581	144912	97604.6	234403	200980	406068	365558	487606	336474	398263	382818	369486	346353	433543	389577	4530.3	4726.41	312353	312611	249305	364712	287748
M61/ 1100	8.3203	0.00039386	0.00062702	None - Full; RDI - Full	301150	571974	544248	551002	454672	904805	327812	354018	306853	297312	282557	245354	236805	286567	460416	232809	300339	273760	1.82215e+06	856748	868135	873912	438134	400316	525814	302267	245949	269376	397080	381076	825852	1.50236e+06	220248	227582	595338	603694	664062	358489	13430.2	23486.4	2.42061e+06	2.63176e+06	486810	466932	2.84324e+06
M85/ 1640	16.105	5.455e-07	2.2595e-06	None - Full; RDI - Full; None - RDI	303777	362846	219378	302316	395077	606267	200410	228540	489773	471000	609834	473418	711267	317258	442471	405849	520667	269279	239387	274826	299360	286935	180155	170657	247283	268420	1.13106e+06	578735	140863	142281	144193	257470	332171	322721	538890	264267	515922	336106	691.799	35.6508	113818	115524	329369	258644	88748.2
M87/ 1220	11.182	3.2469e-05	6.8386e-05	None - Full; RDI - Full	312597	239464	161275	151643	175076	156799	209160	239387	496100	375815	624690	151592	285977	320324	545941	396811	327603	320755	51707.6	139099	121119	114335	1314.46	160938	200634	281574	308019	292216	3689.04	214578	161855	129565	419139	2300.41	390934	404229	191870	231188	1237.48	719.625	117472	115182	248519	225204	112618
M102/ 1440	12.133	1.4456e-05	3.3898e-05	None - Full; RDI - Full	313270	276089	175190	163512	240180	295783	238474	231542	501201	434767	709801	605029	439069	385332	660393	605627	352542	285150	141869	196881	128783	122086	128834	125594	268522	279161	759499	553003	218385	214106	104860	112779	618737	595145	583966	533435	319552	288171	331.446	40.3516	43116.4	52970.2	466475	445887	44595.7
M74/ 1920	9.0314	0.00020997	0.00034824	None - Full; RDI - Full	314572	285383	235847	212423	245568	201196	224362	264163	288478	287342	249180	239290	201502	217555	182790	219951	213314	200384	254347	207891	185396	214352	230794	237357	201800	253684	186155	229090	279813	253341	219575	195783	210592	195540	211896	221012	203316	195052	24237	9289.23	244261	228887	241153	240691	238505
M89/ 1850	18.643	7.2916e-08	6.9416e-07	None - Full; RDI - Full; None - RDI	321628	507586	631568	868838	612475	802060	272484	373419	408033	473366	468256	469036	673981	401995	334410	343057	582646	375173	729136	1.08334e+06	1.00462e+06	815506	465324	488710	346319	323406	664716	405783	303346	369916	697619	1.16564e+06	194258	221395	502808	278666	661354	439597	1007.37	604.903	402207	435432	667499	530649	453208
M85/ 2060	16.574	3.7429e-07	1.8754e-06	None - Full; RDI - Full	324796	317541	194115	195704	186364	157459	199188	231584	504634	590475	698308	746472	258767	286464	549725	526099	241922	213805	246696	171650	119430	131148	91479	130756	244305	242913	314022	403590	122421	137350	163501	144979	293735	248833	300435	270105	145627	129359	931.343	160.879	159672	156266	269680	263453	130848
M60/ 2280	17.194	2.2823e-07	1.2632e-06	None - Full; RDI - Full; None - RDI	328733	278471	187057	161357	166885	288215	153414	200087	339614	513160	485115	661122	201610	242995	400495	385474	178018	179588	178961	63335.5	53967.2	61681	243705	62061.8	168837	152147	208557	291130	122443	61969.3	100666	59831.8	118245	56429.6	156843	117416	81364.5	65129.6	1084.2	476.119	77217.4	71317.9	76010	94004	200726
M41/ 1920	4.6153	0.011537	0.015557	None - Full	329656	297852	265718	260695	278831	222867	248552	249930	334605	223653	282720	214272	225234	249256	206368	216805	172460	212041	207432	283168	227038	201089	219898	233865	174809	165252	173121	210711	286789	273930	253629	213088	240504	220266	251478	195337	233717	211350	34715.6	10168.5	275587	267035	285905	258246	235263
M66/ 1920	9.822	0.00010506	0.00018871	None - Full; RDI - Full	330935	306122	245073	256980	253634	232155	253714	284145	318477	354641	286735	295747	215203	234689	219355	232736	238767	228095	281573	272990	216431	226157	260089	262032	243888	275691	207642	249259	294743	293748	228751	202976	219157	224115	236669	235257	219601	224602	25418.8	6492.62	268889	258313	259539	255734	250784
M143/ 1640	13.578	4.3071e-06	1.1583e-05	None - Full; RDI - Full; None - RDI	331749	404684	243490	328096	429095	693339	230023	249116	530580	539826	694590	535253	826130	346884	505612	445217	590108	298551	257355	299837	317684	316914	178640	188065	273763	267403	1.35104e+06	654564	145887	152012	153323	270901	372021	364955	616661	293486	598260	377233	60.2205	41.5543	111789	123204	353693	284289	84301.4
M57/ 1850	21.665	7.1711e-09	1.6254e-07	None - Full; RDI - Full; None - RDI	338092	580294	468446	905027	514018	862128	262365	420538	481801	559906	586026	623934	704774	469708	437769	469630	651630	434834	780419	1.11132e+06	1.0637e+06	859563	510324	525289	399587	388254	742124	486253	129750	368601	607392	1.1721e+06	226515	303475	473928	235121	655440	491163	3196.13	1261.81	407439	477111	733348	578896	507505
M101/ 2260	22.726	3.2363e-09	1.2837e-07	None - Full; RDI - Full	338150	1.82223e+06	1.1398e+06	2.36491e+06	1.33299e+06	2.31645e+06	616474	1.46793e+06	758592	1.40284e+06	768885	974458	1.06934e+06	1.73293e+06	551774	793062	1.3683e+06	1.17248e+06	2.36099e+06	2.93459e+06	2.22783e+06	1.98085e+06	1.59901e+06	1.85964e+06	1.21166e+06	1.27513e+06	1.53572e+06	1.22988e+06	996228	1.50976e+06	1.60601e+06	2.75e+06	1.46342e+06	1.73746e+06	1.40026e+06	1.31877e+06	1.9723e+06	1.69724e+06	22214.6	34118.4	1.06434e+06	1.99388e+06	1.94705e+06	1.79723e+06	1.5238e+06
M83/ 1640	17.604	1.6495e-07	1.033e-06	None - Full; RDI - Full; None - RDI	339182	412238	166624	371185	439293	747079	219098	269657	522303	569775	746577	578530	873630	373583	530214	460389	618701	286705	272214	331732	364869	300002	196000	197235	308686	288568	1.41287e+06	696586	95237.6	117145	96448.6	278663	374093	396825	633804	286001	621561	387271	642.626	42.2426	97278.7	121718	378949	260867	87281.6
M73/ 1100	8.5522	0.00032062	0.00051733	None - Full; RDI - Full	342011	569208	608649	618311	668700	930271	370368	408499	502614	330384	812007	277546	283706	345448	453407	264528	339824	313132	1.77994e+06	949079	944898	964556	503534	459878	531036	368428	286783	311219	456461	434529	911913	1.5353e+06	265062	271453	597567	623143	684080	416778	28702.6	27716.2	2.74163e+06	2.99812e+06	563668	540972	2.89861e+06
M101/ 1540	18.415	8.7106e-08	7.2741e-07	None - Full; RDI - Full; None - RDI	347665	501194	525588	1.0615e+06	761077	1.5749e+06	290759	358712	416197	649085	294122	313644	498735	337983	193007	109127	344589	214231	1.16407e+06	1.19038e+06	1.15789e+06	1.42718e+06	342346	407583	181417	270344	727625	332147	198700	207570	290256	468863	124594	60816.2	166593	106602	352967	263039	1003.42	356.561	323656	422382	237254	202800	260303
M73/ 2280	18.15	1.0726e-07	8.2471e-07	None - Full; RDI - Full; None - RDI	348657	369462	198966	236805	188181	169862	176510	242707	362288	592120	509470	779101	211719	334136	514067	442975	220199	242536	609195	281084	136132	520238	505259	100374	219173	203727	277978	331773	189298	104526	158628	170875	169790	89502.6	215055	165089	130978	112409	11191.6	5549.8	283750	228660	106030	143093	94521.8
M87/ 1100	10.557	5.5561e-05	0.00010707	None - Full; RDI - Full	358114	533840	621849	602526	528537	842980	377284	408829	331884	344898	313100	230141	262958	351058	415651	253396	340966	289082	1.76724e+06	982851	967770	1.01009e+06	525431	476860	480864	328216	250723	300224	462201	440790	951960	1.43194e+06	249297	258219	563590	553961	617036	416140	16006.3	18569.6	2.73934e+06	2.84343e+06	562818	535683	3.08279e+06
M147/ 1510	4.6315	0.011364	0.015367	None - Full	362164	254582	286807	11002.3	265380	203722	330336	176626	243114	177271	445477	9201.2	464400	330681	435021	215087	435928	218872	148611	166279	125284	149915	138575	241162	101462	198558	210843	197211	408366	463685	818736	253607	296193	287172	256573	243504	331019	468460	16762.8	10209.7	253454	218106	160270	422408	224448
M69/ 1660	19.885	2.7835e-08	3.7855e-07	None - Full; RDI - Full	367090	378438	304381	304561	369884	394704	243619	275208	395279	337868	227265	249035	220038	216255	171472	151479	237084	190671	562535	295866	271212	342136	262363	258708	187729	205637	166842	231339	43170.6	432918	270965	242612	148495	206737	240004	245660	236727	264469	2198.24	1916.63	255356	311996	342290	394166	470738
M56/ 1440	8.3273	0.00039141	0.00062521	None - Full; RDI - Full; None - RDI	367660	321469	196280	207753	287675	344215	261886	280999	584846	500231	831430	701833	507330	456738	769221	708126	420002	344944	178695	249587	167722	148328	153114	144688	331228	344879	867826	647281	203964	261403	101426	113364	710945	698119	652309	611105	371514	340265	352.616	139.699	160599	117336	554132	517935	183237
M73/ 2170	11.786	1.9401e-05	4.3561e-05	None - Full; RDI - Full; None - RDI	369372	260292	239316	307892	285951	277779	183871	193845	275875	416197	275417	311666	147028	273204	208241	135156	117765	130679	363503	20627.7	120886	169942	116426	108147	118901	128611	116973	174714	144221	62487.1	117625	64406	58682.8	25965.5	63728.1	39392.4	45115.5	38008.5	1828.72	1419.32	120595	111810	33673.1	17335	98995
M52/ 1920	6.8593	0.0014618	0.0021676	None - Full; RDI - Full	372053	312605	297517	271795	303945	255990	310415	242794	386525	245458	325627	311779	256810	215011	177218	228486	256247	201007	270521	290637	219848	215907	173936	248134	216950	313214	181440	240925	366185	322473	289747	245992	275547	273096	273002	288584	254391	274853	34905.7	10323.5	277492	300740	279664	266320	253062
M157/ 1850	17.639	1.605e-07	1.0324e-06	None - Full; RDI - Full; None - RDI	376439	569773	706604	983601	626096	910547	304501	416546	500284	520039	536348	519690	744668	441073	366888	381813	646288	411913	823305	1.2483e+06	1.15567e+06	929147	514117	540512	381023	360581	751283	447602	343545	407499	785526	1.34693e+06	235613	255906	556565	307021	742799	512920	504.689	875.188	451550	485865	760572	590928	501713
M45/ 1640	12.245	1.3147e-05	3.1289e-05	None - Full; None - RDI	385445	444724	298824	396012	496374	684201	364222	297082	610873	546095	717396	543002	825033	372006	500269	497564	582121	356238	297525	396808	386559	403703	243683	247351	311615	320620	1.24607e+06	649484	238215	259610	197397	425295	423259	431573	654829	385056	626922	465063	55410.5	55060	234565	275437	445249	348628	229244
M60/ 2170	15.893	6.4714e-07	2.4643e-06	None - Full; RDI - Full; None - RDI	391375	211104	250503	288631	292173	190029	202140	164915	304088	412724	292518	310717	170446	198045	177941	118326	94947.1	106227	364474	96731.8	105123	148353	100235	94918	129037	132425	87548	175110	124010	47220.5	91648.2	47465	38571.1	21541.5	34343.3	28245.8	29103.1	26496.5	911.294	241.461	104755	99360.3	27358.8	25940.6	77375
M87/ 1440	11.496	2.4828e-05	5.4713e-05	None - Full; RDI - Full	399054	322024	225994	210414	307412	358568	305648	279640	558100	289707	539695	225978	496133	321271	585241	336067	223526	359177	106254	230742	150421	143939	143266	124011	322789	331745	704200	391547	285308	274929	136273	144734	733045	658687	693617	429551	399048	356697	776.028	326.746	43290.3	41124.6	512991	409931	53122.5
M61/ 1850	18.476	8.3072e-08	7.2692e-07	None - Full; RDI - Full; None - RDI	404839	563625	667168	898106	614272	830885	317643	426900	508307	567852	602086	596650	720896	456160	419197	463653	645150	424770	752904	1.09955e+06	1.01243e+06	824755	496418	503045	377752	368546	715720	463402	366861	412565	745015	1.16608e+06	293747	306384	572659	334849	694294	501651	4121.24	1643.81	466825	492367	709388	574697	493852
M43/ 1040	4.7349	0.010317	0.013992	Full - None; Full - RDI	407744	116315	91768.5	92319.6	361389	146744	130037	144819	461392	252243	644409	266866	595233	457326	107633	580345	159047	158166	167161	274841	119916	119626	220284	90441.2	98664.5	375916	110741	173855	113939	99712.3	117006	83813.8	174877	347541	180976	190889	117443	155580	44197.1	32782.8	465230	492393	105766	105828	389520
M69/ 1850	19.164	4.8593e-08	5.6416e-07	None - Full; RDI - Full	412656	552747	569312	791657	497354	781667	286009	459012	515186	599057	584146	552104	636547	436735	469086	420616	614850	444436	813407	992364	915921	769433	494912	487300	427940	372817	694066	540580	239403	416626	625943	1.0355e+06	319022	328581	524217	327997	635733	470673	3403.27	1200.72	572991	580717	728976	642359	608541
M43/ 1820	9.5104	0.0001379	0.00023957	None - Full; RDI - Full	417137	442231	830869	897551	543592	584434	408559	466096	333989	358522	297558	312204	284099	316713	355014	329199	320131	312354	2.2016e+06	1.76881e+06	1.3039e+06	1.37734e+06	515845	516709	418618	409912	245751	289417	542302	540546	1.2689e+06	1.16226e+06	217095	206677	308723	316020	404830	390264	41324.8	17044.8	6.86704e+06	6.74172e+06	658222	679113	5.25336e+06
M83/ 1440	14.496	2.0183e-06	6.2383e-06	None - Full; RDI - Full	423213	404235	203076	258685	297788	437025	364084	379009	781265	673096	1.06844e+06	969816	642501	606973	1.04978e+06	944138	571411	456289	232550	319799	189330	183199	74629.8	158216	420275	449968	1.20441e+06	887441	145525	50132	56885.8	142039	906788	971662	912649	755129	464262	445372	249.738	34.9765	88916.4	71260.5	747560	649728	72694.6
M143/ 1440	12.413	1.1413e-05	2.7577e-05	None - Full; RDI - Full	424541	368669	235440	223711	328280	404809	327358	305180	693852	609545	1.01666e+06	850507	608727	532787	933949	856919	488867	391549	192000	277391	176540	157283	173694	169052	368781	391282	1.06827e+06	769886	298863	290415	137332	153840	876908	844334	827982	753638	450088	394640	158.79	0	56931.6	69846	648098	618555	66061.6
M90/ 1920	10.252	7.2319e-05	0.0001346	None - Full; RDI - Full	426846	396909	314103	335538	310776	304543	331392	372498	406243	465957	345891	385113	268387	304855	291612	293304	309417	296192	363348	352416	280991	286744	348241	341333	321292	361498	263022	325446	371758	374079	282381	263495	266493	285251	309863	308280	283034	279232	28812.2	9838.99	344769	322704	337111	328309	326169
M88/ 1330	11.336	2.8464e-05	6.1791e-05	None - Full; RDI - Full	432871	338615	812264	728232	751715	738821	393155	398212	441109	391480	230816	189753	396626	407789	199676	114947	337832	287130	1.01491e+06	1.3083e+06	856112	922804	647396	514418	178515	300329	297642	288449	800354	765317	1.11726e+06	950329	317292	308675	404351	396710	576916	648144	3950.83	2049.57	1.26038e+06	1.37546e+06	908610	887372	1.1708e+06
M45/ 1160	14.454	2.0876e-06	6.3699e-06	Full - None; RDI - None	438538	309131	423583	373346	694649	311700	370183	345277	133725	389680	771571	304894	457333	423437	258038	370873	354426	308621	321494	321845	318010	305456	353583	307874	220644	429849	279049	354602	433138	357183	307575	249388	271138	362798	260850	274776	216771	261686	76114.6	37157.3	258813	286986	418648	368428	366359
M135/ 1770	3.5009	0.032979	0.042056	RDI - Full	445103	61102.8	354197	17794.5	302699	159172	117233	271140	305814	358379	938576	234911	506083	392561	87459.7	456630	297170	388976	202611	522803	403466	503161	84171.6	481282	88422.1	701168	408628	432377	811659	322919	180140	33369.3	357025	322637	283591	233029	221770	650114	25748.1	14492.2	193733	727949	631310	904925	716723
M45/ 1080	6.4631	0.0020954	0.003069	Full - None; Full - RDI	461005	527654	333987	335371	388257	305289	364980	426964	468778	409725	1.01824e+06	575377	586633	444558	656666	461933	342692	247090	272680	290430	377040	352174	409047	339425	534414	392514	472373	339212	455575	388058	400743	286974	365849	524833	345315	337892	427600	398546	108785	90848.3	226037	371529	353546	398273	503312
M70/ 1850	9.3383	0.00016034	0.00027356	None - Full; RDI - Full	475356	735974	931905	1.21205e+06	946995	1.10706e+06	397251	527506	604449	156233	661982	185931	923320	544932	471082	498480	795594	9856	788051	1.4908e+06	1.17235e+06	974079	5155.95	5867.89	445951	445105	232254	154348	477777	535709	1.01604e+06	1.65025e+06	324928	338248	738965	395584	947666	664136	2750.17	2200.95	610000	617760	78779.7	637298	572853
M62/ 1920	9.5987	0.00012766	0.00022377	None - Full; RDI - Full	479188	434049	361832	355931	376192	329073	371784	409286	465584	512347	408250	420900	310509	339940	315466	336858	339096	326300	404931	373126	315367	326126	377582	377500	350896	392196	297855	364981	430153	423668	338682	302480	323286	325649	349211	338301	321663	322323	40584.2	15565	385553	371683	372590	377036	363676
M57/ 1640	18.44	8.5433e-08	7.2692e-07	None - Full; RDI - Full; None - RDI	496395	718590	308930	607299	769277	1.18847e+06	384941	471467	957162	904300	1.22325e+06	953248	1.40611e+06	653909	898776	817068	1.03758e+06	556008	490174	568270	606775	581751	344405	289931	492117	521120	2.20267e+06	1.16114e+06	32433.4	288317	173205	499073	415268	658519	985527	513860	1.06153e+06	653304	2701.26	1409.97	208246	232953	652800	513675	157954
M70/ 1460	10.756	4.6799e-05	9.3206e-05	None - Full; RDI - Full	526605	368847	599869	564531	711157	572384	379097	393065	465100	451022	412257	340362	336930	330442	94399.9	275331	358024	295149	1.09552e+06	908632	616638	629051	445139	408057	218987	303829	331403	341927	644487	615388	856656	708806	244896	267427	360865	334445	321457	395824	55427.6	14096.8	889619	897198	693183	697555	1.29033e+06
M65/ 1790	10.645	5.1479e-05	0.00010084	None - Full; RDI - Full	529262	568355	1.21649e+06	1.28419e+06	654702	719134	452291	519852	422250	461715	184112	208010	351278	383159	155552	159581	258438	288209	2.34376e+06	2.1548e+06	1.43353e+06	1.56553e+06	780760	877395	316413	307026	195087	238046	1.15035e+06	1.12746e+06	1.58785e+06	1.42248e+06	186669	170326	336596	331738	567514	537083	31457.1	13215.8	2.59761e+06	2.51293e+06	1.3456e+06	1.39425e+06	2.94562e+06
M69/ 1440	9.8029	0.00010682	0.00019115	None - Full; RDI - Full	534320	496973	247512	264176	430238	541193	431159	446882	899168	813957	1.29792e+06	1.11856e+06	817471	719209	1.22739e+06	1.13031e+06	658015	519602	191865	377236	248965	222316	240044	230605	487849	532230	1.39535e+06	1.02879e+06	175850	367364	160190	185183	1.12381e+06	1.06496e+06	1.01476e+06	960251	548038	531209	288.357	264.703	80297.7	92842.3	878057	828829	89117.4
M70/ 1660	16.697	3.3934e-07	1.775e-06	None - Full; RDI - Full; None - RDI	577292	563486	422585	407948	439787	632615	373884	393032	629483	630937	658210	598413	464888	358389	430813	400557	430431	341499	662557	373496	307642	358109	322315	331516	360710	262695	604440	525409	515074	556698	430737	336784	429687	431538	529303	409748	436988	398563	7446.98	988.732	369677	345355	536264	544555	524246
M71/ 1640	16.109	5.4349e-07	2.2595e-06	None - Full; RDI - Full; None - RDI	585424	692506	427363	580917	708727	1.14131e+06	405801	440968	871911	895465	1.12677e+06	879368	1.32383e+06	593075	838726	743288	964686	519409	474845	526830	568176	564845	313462	324189	471537	463726	2.07086e+06	1.06156e+06	255657	265264	288946	487664	613311	609369	1.0047e+06	504250	967899	638314	1182.08	381.723	247278	227626	612749	500479	179953
M92/ 1790	11.174	3.2683e-05	6.8533e-05	None - Full; RDI - Full	589505	624520	1.36323e+06	1.45628e+06	730018	806861	496804	592543	477575	514266	212487	230273	391064	455985	196915	179992	359773	347059	3.18559e+06	2.44158e+06	1.63656e+06	1.76641e+06	993913	979352	382010	379173	240491	289294	1.28245e+06	1.25671e+06	1.77994e+06	1.60538e+06	200240	195302	375750	375658	632798	611369	39902.8	10790.4	2.94233e+06	2.85361e+06	1.53609e+06	1.57277e+06	3.3486e+06
M89/ 1640	16.104	5.4589e-07	2.2595e-06	None - Full; RDI - Full; None - RDI	625493	754068	457258	616408	789135	1.25707e+06	435613	470284	979525	985449	1261793	977786	1.48878e+06	641395	924475	822416	1.07984e+06	562428	482003	563565	596441	586198	332003	351824	513097	507471	2.33662e+06	1.18388e+06	272997	289439	269047	504744	688772	673905	1.12287e+06	553528	1.08154e+06	699451	1076.4	419.007	227484	235256	669155	530585	163797
M43/ 1850	13.296	5.4441e-06	1.4161e-05	None - Full; RDI - Full	637806	849185	985634	1.13471e+06	933002	912567	485658	596207	801195	860597	902323	881553	1.00867e+06	568429	517244	679712	741857	673882	582802	1.21818e+06	630936	959876	247421	619619	462347	557465	849960	548279	575654	645266	1.1226e+06	1.60971e+06	459637	494832	868823	489815	955926	766714	13464.4	7671.46	739296	795992	1.08829e+06	719418	692458
M88/ 2260	23.014	2.611e-09	1.1298e-07	None - Full; RDI - Full; None - RDI	650025	3.2158e+06	1.98917e+06	4.14956e+06	2.3402e+06	4.05756e+06	1.07296e+06	2.61525e+06	1.31972e+06	2.43745e+06	1.37389e+06	1.74043e+06	1.9338e+06	3.02759e+06	1.1436e+06	1.29252e+06	2.46627e+06	2.08417e+06	4.1463e+06	5.1532e+06	4.6531e+06	3.49645e+06	3.38191e+06	3.59565e+06	2.25185e+06	2.30252e+06	2.6695e+06	2.19991e+06	1.76819e+06	2.65919e+06	2.81814e+06	4.82983e+06	2.5636e+06	3.05068e+06	2.45978e+06	2.30529e+06	3.46573e+06	2.98083e+06	46295.7	62041.6	1.8674e+06	3.49682e+06	3.47517e+06	3.14994e+06	2.72263e+06
M73/ 1130	8.0575	0.00049769	0.00078444	None - Full; RDI - Full	653703	235465	707695	229405	598236	217120	646979	297102	387642	159266	88209.1	205387	576844	62061.8	384886	86569	493264	478385	377213	424614	452711	437268	218310	441988	305486	255579	514289	96841.8	598413	850056	1.2706e+06	932409	1.13067e+06	473267	1.15733e+06	941502	970325	911650	9157.2	3019.11	911969	441376	393445	948117	751635
M69/ 1640	17.333	2.0438e-07	1.201e-06	None - Full; RDI - Full; None - RDI	655707	792121	419385	664599	808361	1.31308e+06	440152	499804	1.02467e+06	1.03111e+06	1.30402e+06	1.01699e+06	1.54192e+06	676072	950972	858572	1.12595e+06	594994	509867	591992	659912	634614	351841	375854	542343	536742	2.44359e+06	1.24199e+06	184093	293660	209281	546881	684489	658775	1.16865e+06	580707	1.12698e+06	705599	1114.59	230.794	226710	263153	638528	557558	182417
M104/ 1920	20.933	1.2478e-08	2.3758e-07	None - Full; RDI - Full	689884	681932	368442	518387	394587	469874	561806	648942	563968	793997	555754	662522	441499	557525	503670	510140	515629	491201	605533	594103	454815	496866	552457	578489	463813	643059	422526	595608	357721	567727	186654	316899	315679	324647	437229	469826	318474	408327	43852.1	16643.3	524084	509944	619321	548067	554062
M41/ 1850	17.317	2.0696e-07	1.2014e-06	None - Full; RDI - Full; None - RDI	705999	861205	975708	1.26154e+06	909057	1.19926e+06	537538	650926	878098	946082	987866	978951	1.05175e+06	690666	740603	744048	640810	683305	1.05186e+06	1.55411e+06	208390	1.17579e+06	360128	700564	564589	620087	1.06232e+06	733403	616296	676831	1.09033e+06	1.64947e+06	542685	562720	876352	556643	1.01614e+06	752849	11808.6	4477.82	803328	827165	1.09085e+06	904609	812502
M89/ 1440	11.056	3.6149e-05	7.4813e-05	None - Full; RDI - Full	717274	622918	402612	384807	553181	675669	20850.4	533267	1.13277e+06	981952	1.60403e+06	1.36777e+06	991665	875995	1.49122e+06	1.36367e+06	804258	649880	328717	461271	303471	276003	295492	283869	621101	651459	1.6924e+06	1.2444e+06	505583	495865	243260	257434	1.3933e+06	1.34831e+06	1.33645e+06	1.21528e+06	746036	652626	526.656	210.624	101730	114771	1.05567e+06	1.004e+06	100555
M73/ 1510	3.734	0.026438	0.034478	None - Full; RDI - Full	742564	493394	492365	400176	76743.8	356035	554010	300536	470062	267384	822222	321260	775233	400978	665998	299638	500635	323011	268239	373064	211647	75578.9	136580	269592	217431	250444	280826	135806	719460	816316	1.40943e+06	440232	520482	497925	451149	440655	591470	690473	22976	18076	412002	413484	91417.8	757339	329810
M50/ 1920	9.4644	0.00014357	0.00024782	None - Full; RDI - Full	745344	683638	562932	571960	586111	517153	578145	637096	722648	784478	640798	654491	482944	530999	497441	525410	532812	513719	626587	610445	488486	514391	586574	581831	543980	614982	467007	566575	668761	658242	529774	468840	506121	507559	548374	532781	505002	505705	70703.3	24360.1	597845	579942	585786	582088	563386
M101/ 2060	15.954	6.158e-07	2.4178e-06	None - Full; RDI - Full	745359	1.62877e+06	2.03017e+06	2.86568e+06	1.73113e+06	2.40244e+06	874352	1.30419e+06	750663	949184	635640	772247	862903	853939	364187	478061	773013	923045	2.47189e+06	3.84478e+06	2.67685e+06	2.37016e+06	1.80313e+06	1.96494e+06	1.2841e+06	1.20954e+06	736882	598718	1.15254e+06	1.50836e+06	2.62856e+06	4.70508e+06	908770	1.0666e+06	894129	1.10169e+06	1.43027e+06	1.16741e+06	9314.55	18828	1.32928e+06	1.7166e+06	2.65892e+06	2.65423e+06	1.5207e+06
M103/ 1920	3.9901	0.020756	0.027444	None - Full; None - RDI	764665	722673	773449	496170	720184	522953	731211	425947	776720	442919	636370	519433	579134	529530	424378	483109	416037	364473	298119	382674	272058	31961.2	284338	14051.6	361812	11379.5	391564	307551	869939	779146	730647	627797	657951	606297	747276	659236	691698	626778	86053.2	31344.7	40790.6	644039	638440	23755.2	640239
M129/ 1440	12.774	8.4248e-06	2.1298e-05	None - Full; RDI - Full	778309	498454	346798	334285	671344	881764	463538	702380	1.56788e+06	1.37899e+06	2.22293e+06	1.9149e+06	1.31445e+06	1.18816e+06	2.09987e+06	1.89433e+06	1.06573e+06	852899	430353	595440	392258	360009	365108	378559	824648	836101	2.37529e+06	1.72926e+06	260579	456525	73209.4	273499	1.74045e+06	1.89021e+06	1.69553e+06	1.52508e+06	949886	865777	536.769	46.9964	141403	167456	1.4512e+06	1.37029e+06	149607
M164/ 1790	15.076	1.2549e-06	4.2668e-06	None - Full; RDI - Full	780899	1.14359e+06	2.52336e+06	2.83909e+06	1.14341e+06	1.53101e+06	689928	1.09902e+06	695891	986763	348387	433406	460522	817844	342122	319985	644195	544746	6.45683e+06	4.84846e+06	3.22173e+06	3.46103e+06	1.94145e+06	1.8534e+06	700924	686016	451532	526006	686632	2.04292e+06	1.47923e+06	2.83725e+06	83886.1	212258	320134	514700	607933	1.05794e+06	50489.8	22578.9	5.73287e+06	5.62738e+06	2.95368e+06	2.97508e+06	6.82788e+06
M61/ 1220	8.6829	0.00028557	0.00046874	None - Full; RDI - Full	812313	686330	423671	402548	485686	428818	545857	572489	1.27417e+06	1.0283e+06	5118.7	1.52367e+06	735621	381421	1.41999e+06	1.06985e+06	860177	790265	357518	377445	321432	329817	302981	448924	609864	95857.9	874309	440488	315473	566969	419496	362019	1.07884e+06	543968	1.05812e+06	1.04343e+06	549236	602560	2733.46	4382.86	319989	329181	663362	674788	306992
M123/ 1920	9.7105	0.00011579	0.00020565	None - Full; RDI - Full	863359	791317	646117	658787	667749	595555	661980	735628	825275	921456	729507	764010	547135	604040	568243	596963	609391	586546	725924	702839	566073	590114	673275	666446	624676	706710	528617	652861	768231	757336	597976	530650	567671	575543	617464	605408	572626	574756	81031.3	26188.2	693123	663757	669212	668798	653168
M88/ 1540	17.785	1.4296e-07	9.7214e-07	None - Full; RDI - Full; None - RDI	894674	1.31525e+06	1.40056e+06	2.78399e+06	2.03646e+06	4.13074e+06	755823	999719	1.17229e+06	1.70375e+06	806064	853588	1.30861e+06	868273	542653	412638	915697	592032	3.11402e+06	3.41279e+06	3.04157e+06	3.70334e+06	1.00729e+06	1.07097e+06	638665	711367	2.15617e+06	1.62327e+06	524156	564473	748028	1.23109e+06	322730	349776	441086	299218	936404	694383	2037.57	1123.45	869302	1.09381e+06	619258	541288	855161
M61/ 1640	15.416	9.5164e-07	3.3236e-06	None - Full; RDI - Full; None - RDI	913748	1.08681e+06	673513	907413	1.13027e+06	1.76734e+06	637502	682414	1.39468e+06	1.40263e+06	1.78099e+06	1.39214e+06	2.07363e+06	930165	1.31247e+06	1.17488e+06	1.52223e+06	826575	705993	821682	859903	852912	497209	515160	740303	737649	3.16683e+06	1.65829e+06	412891	431692	443618	748187	1.00868e+06	979153	1.59352e+06	804485	1.53054e+06	1.00983e+06	1205.95	339.04	344148	355094	965818	772985	249457
M73/ 1850	16.326	4.5659e-07	2.0758e-06	None - Full; RDI - Full; None - RDI	930703	1.29024e+06	1.2099e+06	1.69849e+06	1.19036e+06	1.56022e+06	666165	947194	1.23873e+06	1.37591e+06	1.41346e+06	1.64129e+06	1.3281e+06	1.19391e+06	1.30401e+06	1.32138e+06	1.34463e+06	987050	1.40722e+06	2.03989e+06	1.77585e+06	1.54736e+06	940894	964056	811802	853110	1.39285e+06	1.04704e+06	815462	850923	1.36583e+06	2.03117e+06	789568	799515	1.30355e+06	773509	1.38894e+06	1.06651e+06	16830.5	11042	1.03026e+06	1.05689e+06	1.35339e+06	1.30609e+06	973443
M129/ 1680	10.015	8.8823e-05	0.00016137	None - Full; RDI - Full	932260	909350	633721	683314	965785	914434	645417	743967	786354	850143	1.34561e+06	1.42683e+06	662215	783123	841551	847977	831039	804689	1.87756e+06	1.79469e+06	1.10414e+06	1.12885e+06	922443	923260	547554	613475	729686	882662	1.28224e+06	1.23908e+06	1.07352e+06	920142	756914	729106	832308	816743	723267	714861	117242	37064.9	1.37003e+06	1.27448e+06	1.07652e+06	1.11631e+06	1.83758e+06
M55/ 1100	3.3205	0.039155	0.049176	None - Full	949140	1.52485e+06	1.73066e+06	389914	1.88729e+06	1.65258e+06	1.04493e+06	961141	1.59554e+06	562373	2.18375e+06	598954	704356	998913	1.0709e+06	676644	457482	716875	5.06105e+06	1.23635e+06	2.4063e+06	325332	845132	813349	756794	1.02726e+06	503128	643857	1.27531e+06	1.10075e+06	2.59692e+06	3.70042e+06	733754	752677	1.88755e+06	1.7161e+06	2.09628e+06	1.14319e+06	32929.7	51860.2	1.79855e+06	7.23274e+06	1.6187e+06	1.36189e+06	7.65524e+06
M60/ 1640	16.475	4.0503e-07	1.9474e-06	None - Full; RDI - Full; None - RDI	992402	1.1658e+06	725210	973660	1.34336e+06	1.89222e+06	687042	742904	1.61087e+06	1.50905e+06	1.91573e+06	1.50018e+06	2.23274e+06	1.07219e+06	1.40281e+06	1.26755e+06	1.6424e+06	881700	761241	889309	932439	922182	561221	562076	795327	834362	3.41824e+06	1.79621e+06	569084	467010	483577	805804	1.08043e+06	1.05608e+06	1.70722e+06	865750	1.63944e+06	1.08564e+06	39841	3786.31	380427	398340	1.04351e+06	830489	279402
M73/ 2060	14.778	1.6006e-06	5.148e-06	None - Full; RDI - Full	1.00799e+06	1.05345e+06	615409	929383	602965	455163	612507	716810	1.57588e+06	1.86494e+06	2.18979e+06	2.39048e+06	775882	904640	1.74368e+06	1.67714e+06	734741	762272	659522	538817	970742	317202	601977	298269	762623	799721	981984	1.30602e+06	432261	443885	317984	1.42698e+06	949084	835888	1.00392e+06	895638	497137	484197	5274.49	1856.75	499903	542198	819191	850690	378870
M60/ 1850	13.819	3.5255e-06	9.7003e-06	None - Full; RDI - Full	1.05484e+06	1.08521e+06	976964	1.12219e+06	1.05092e+06	1.0284e+06	679694	806673	1.47192e+06	1.51737e+06	1.67637e+06	1.86545e+06	1.12904e+06	1.03253e+06	1.41163e+06	1.54515e+06	1.18477e+06	933384	1.09473e+06	1.36113e+06	1.1551e+06	1.00367e+06	711036	717999	728714	876591	1.12877e+06	1.05545e+06	729945	750946	983118	1.30069e+06	914387	937354	1.07713e+06	812063	913009	801491	46162.5	6507.52	1.03734e+06	1.02608e+06	1.04946e+06	960543	857522
M41/ 1640	14.506	2.0013e-06	6.2263e-06	None - Full; RDI - Full; None - RDI	1.08999e+06	1.27386e+06	800512	1.05822e+06	1.44056e+06	1.82372e+06	756995	854614	1.71322e+06	1.54696e+06	2.1408e+06	1.54918e+06	2.28906e+06	1.06507e+06	1.53112e+06	1.31266e+06	1.45281e+06	953413	754512	994727	793138	970194	611072	641433	854459	924961	840932	1.52589e+06	577115	573032	577406	905174	1.18474e+06	1.19869e+06	1.86616e+06	951449	1.7978e+06	1.18993e+06	47140.8	3198.77	409192	548288	1.08964e+06	939372	315333
M73/ 1220	5.5714	0.004747	0.006607	None - Full; RDI - Full	1.11299e+06	913764	569726	541194	78191.8	577380	745529	778051	1.74047e+06	1.41098e+06	1.06467e+06	2.09527e+06	1.02895e+06	3835.14	1.93133e+06	1.48224e+06	1.16316e+06	1.07372e+06	483854	510895	438083	440445	1895.94	606246	795337	257865	1.20121e+06	543038	4525.68	777294	557124	493565	1.47857e+06	818377	1.43685e+06	1.43187e+06	741690	819264	3819.92	2817.76	428807	447440	907941	923778	410660
M157/ 1640	16.154	5.2436e-07	2.2372e-06	None - Full; RDI - Full; None - RDI	1.12048e+06	1.35215e+06	801633	1.09966e+06	1.40173e+06	2.29824e+06	758250	828997	1.76128e+06	1.78526e+06	2.30668e+06	1.76031e+06	2.7539e+06	1.14208e+06	1.66649e+06	1.47889e+06	1.95641e+06	1.00104e+06	847601	998529	1.0493e+06	1.04412e+06	588513	613074	906337	892838	4.47556e+06	2.15324e+06	476934	507182	520627	893999	1.24276e+06	1.21066e+06	2.03944e+06	968838	1.98292e+06	1.24979e+06	985.97	226.498	402791	409204	1.18493e+06	934728	288356
M55/ 1640	10.027	8.7863e-05	0.00016024	None - Full; RDI - Full; None - RDI	1.14548e+06	1.16383e+06	832246	736885	1.42616e+06	977179	774239	515122	1.51143e+06	787657	1.69636e+06	986719	1.80444e+06	567775	349030	965104	1.33844e+06	757319	547915	773074	671021	752853	382249	475826	582578	402195	3.41934e+06	1.67834e+06	527314	548667	568477	942960	1.23598e+06	1.2262e+06	1.86201e+06	927448	1.62756e+06	937940	5199.05	3223.86	441136	473856	1.09242e+06	849838	230720
M43/ 1640	14.38	2.2199e-06	6.6458e-06	None - Full; RDI - Full; None - RDI	1.15619e+06	1.33763e+06	864628	1.1297e+06	1.46025e+06	1.75278e+06	796729	797816	1.75898e+06	1.44209e+06	2.19479e+06	1.3816e+06	2.19768e+06	853058	772913	1.31182e+06	1.3152e+06	947823	638208	941640	909186	933254	441807	621326	869672	908144	1.02115e+06	1.32055e+06	548143	575139	599016	974006	1.2724e+06	1.23282e+06	1.96221e+06	1.02862e+06	1.88415e+06	1.25899e+06	23890.8	14149.5	495731	516310	1.15433e+06	989509	383403
M104/ 1820	11.332	2.8559e-05	6.1791e-05	None - Full; RDI - Full	1.17719e+06	1.24177e+06	2.45456e+06	2.36609e+06	1.54676e+06	1.54679e+06	1.10693e+06	1.26303e+06	902594	818013	802803	655260	770620	635782	1.21869e+06	795911	787213	778005	5.70602e+06	3.22778e+06	1.10507e+06	3.41474e+06	997180	1.48436e+06	914607	1.11115e+06	411078	577488	1.55923e+06	1.56466e+06	3.77152e+06	3.43742e+06	595389	535438	856564	814998	1.16517e+06	1.07463e+06	71488.9	26678.9	4.81779e+06	1.8687e+07	1.69553e+06	1.89855e+06	1.46263e+07
M155/ 1640	16.544	3.8352e-07	1.882e-06	None - Full; RDI - Full; None - RDI	1.24707e+06	1.49945e+06	901421	1.22267e+06	1.56243e+06	2.54289e+06	847860	915592	1.95435e+06	1.98164e+06	2.55449e+06	1.94798e+06	3.04026e+06	1.26118e+06	1.84846e+06	1.63868e+06	2.16081e+06	1.10643e+06	941862	1.10695e+06	1.16776e+06	1.15434e+06	637861	680681	1.00342e+06	990901	4.90396e+06	2.38154e+06	538617	565664	580049	997999	1.38276e+06	1.34346e+06	2.26707e+06	1.08824e+06	2.18902e+06	1.38453e+06	1489.66	281.397	445487	450921	1.3222e+06	1.0393e+06	305240
M101/ 1220	8.0408	0.00050516	0.00079359	None - Full; None - RDI	1.24869e+06	1.03785e+06	641964	580191	707801	582317	817994	777264	1.96453e+06	1.57238e+06	1.33204e+06	2.1025e+06	1.12357e+06	3019.26	1.96003e+06	888838	1.28702e+06	1.19494e+06	522505	640372	477375	449850	481.723	655316	800554	903.424	1.33019e+06	3027.44	545026	861613	629378	531453	1.66057e+06	1386.08	1.60274e+06	1.59671e+06	829040	867657	2928.1	969.518	454996	444825	998403	1.03022e+06	448008
M70/ 1640	17.159	2.3469e-07	1.284e-06	None - Full; RDI - Full; None - RDI	1.26123e+06	1.48711e+06	906687	1.23093e+06	1.54303e+06	2.29054e+06	844024	843645	1.71672e+06	1.54635e+06	2.36348e+06	1.48846e+06	2.47935e+06	1.26199e+06	1.49186e+06	1.32322e+06	1.73639e+06	1.11287e+06	903330	1.00939e+06	810510	1.12974e+06	565079	654881	752252	584350	2.84208e+06	1.38077e+06	546558	573654	599000	1.01602e+06	1.3799e+06	1.31857e+06	2.20529e+06	1.08099e+06	2.1246e+06	1.37822e+06	1403.5	545.123	455794	435843	1.31493e+06	1.05417e+06	310388
M60/ 2060	15.629	8.0105e-07	2.9331e-06	None - Full; RDI - Full	1.33138e+06	1.31429e+06	761409	728557	779108	604931	809465	919237	2.06678e+06	2.41474e+06	2.85953e+06	3.06997e+06	1.03066e+06	1.16271e+06	2.24204e+06	2.15926e+06	964557	906225	909412	626506	431178	427706	361879	346340	993284	995203	1.27317e+06	1.64434e+06	565823	550197	415237	470550	1.20368e+06	1.02627e+06	1.22208e+06	1.10517e+06	568795	558257	6661.98	1226.35	636664	644292	1.02391e+06	1.05085e+06	503313
M60/ 1220	9.094	0.00019872	0.00033189	None - Full; RDI - Full	1.33886e+06	1.12354e+06	696761	659698	781418	699130	896342	940253	2.11094e+06	1.69212e+06	1.36143e+06	2.50182e+06	1.24833e+06	839928	2.33012e+06	1.88443e+06	1.41505e+06	1.29989e+06	586327	618177	519846	538446	607028	730924	1.00117e+06	1.15951e+06	1.44595e+06	988989	718701	931634	685799	588297	1.76249e+06	1.07649e+06	1.7266e+06	1.71405e+06	897375	987454	4488.49	1950.73	512680	528605	1.1338e+06	1.10912e+06	494050
M73/ 1640	18.616	7.4436e-08	6.9474e-07	None - Full; RDI - Full; None - RDI	1.37893e+06	1.62972e+06	1.00288e+06	1.34365e+06	1.75916e+06	2.68622e+06	942247	1.02831e+06	2.14555e+06	2.11934e+06	2.7108e+06	2.097e+06	3.17562e+06	1.4301e+06	1.98161e+06	1.76636e+06	2.31551e+06	1.22291e+06	1.05263e+06	1.22317e+06	1.28306e+06	1.27097e+06	747277	771872	1.11036e+06	1.11005e+06	4.94833e+06	2.52619e+06	616051	644592	664791	1.11563e+06	1.50804e+06	1.47308e+06	2.41634e+06	1.19993e+06	2.3259e+06	1.51885e+06	5524.12	2108.98	510799	537563	1.44948e+06	1.16228e+06	379660
M69/ 1350	3.5666	0.030986	0.039863	RDI - Full	1.38081e+06	1.02322e+06	965622	1.04155e+06	1.40133e+06	820792	1.10048e+06	1.12655e+06	1.82578e+06	1.36189e+06	1.90062e+06	1.35703e+06	1.05982e+06	1.11305e+06	991976	1.3034e+06	1.45566e+06	1.19541e+06	1.06641e+06	1.00118e+06	849409	855091	1.13717e+06	981016	872947	1.37839e+06	813902	1.07606e+06	916449	1.25609e+06	1.08189e+06	883261	950648	1.21533e+06	1.00692e+06	1.05553e+06	588123	927994	79085.5	19123.3	200007	595467	1.31328e+06	1.21305e+06	751455
M63/ 1920	9.5334	0.00013516	0.00023566	None - Full; RDI - Full	1.39866e+06	1.27919e+06	1.05078e+06	1.07021e+06	1.09205e+06	967027	1.08646e+06	1.19442e+06	1.34643e+06	1.44129e+06	1.20141e+06	1.23062e+06	891310	994832	929759	979773	989553	959921	1.17003e+06	1.14048e+06	904640	951099	1.10164e+06	1.0904e+06	1.01066e+06	1.1542e+06	846513	1.05366e+06	1.25399e+06	1.23903e+06	992522	870684	941052	946605	1.01482e+06	985771	935251	942574	137079	44916.1	1.12422e+06	1.08721e+06	1.08982e+06	1.0845e+06	1.06127e+06
M101/ 1680	10.112	8.164e-05	0.00015004	None - Full; RDI - Full	1.39938e+06	1.35746e+06	951367	1.01687e+06	1.44205e+06	1.38499e+06	970059	1.11386e+06	1.17981e+06	1.26713e+06	2.02451e+06	2.13904e+06	997625	1.17372e+06	1.25944e+06	1.27638e+06	1.25929e+06	1.20203e+06	2.8034e+06	2.69842e+06	1.65097e+06	1.69904e+06	1.39852e+06	1.39683e+06	827940	919403	1.09254e+06	1.32585e+06	1.90705e+06	1.85484e+06	1.60361e+06	1.38127e+06	1.13869e+06	1.09294e+06	1.24415e+06	1.2163e+06	1.09355e+06	1.0717e+06	191257	58246.5	2.04802e+06	1.92279e+06	1.62128e+06	1.67761e+06	2.74884e+06
M93/ 1920	9.6676	0.0001202	0.0002127	None - Full; RDI - Full	1.40489e+06	1.29306e+06	1.05673e+06	1.07613e+06	1.09543e+06	980382	1.08981e+06	1.21284e+06	1.35608e+06	1.4922e+06	1.2009e+06	1.24752e+06	906368	996707	935621	982690	1.00167e+06	966467	1.18358e+06	1.14409e+06	922466	960763	1.10226e+06	1.09332e+06	1.02705e+06	1.15978e+06	871473	1.06803e+06	1.26186e+06	1.23456e+06	986220	874910	943000	950445	1.02254e+06	997641	938704	943953	137072	48047	1.13161e+06	1.08594e+06	1.09379e+06	1.0982e+06	1.06852e+06
M88/ 2060	16.38	4.3732e-07	2.0595e-06	None - Full; RDI - Full	1.41565e+06	3.06644e+06	3.81179e+06	5.38996e+06	3.33335e+06	4.62271e+06	1.66057e+06	2.46505e+06	1.43571e+06	1.83983e+06	1.20959e+06	1.48961e+06	1.60368e+06	1.86658e+06	755138	884941	1.62582e+06	1.72497e+06	4.99812e+06	7.16975e+06	4.66521e+06	4.46609e+06	3.437e+06	3.69373e+06	2.42031e+06	2.36905e+06	1.54684e+06	1.24406e+06	2.1579e+06	2.83245e+06	4.93575e+06	8.7528e+06	1.71277e+06	2.02582e+06	1.66019e+06	2.08908e+06	2.67622e+06	2.18817e+06	24616.8	34388	2.50722e+06	3.21478e+06	4.96719e+06	4.99626e+06	2.83701e+06
M101/ 1850	16.296	4.6776e-07	2.1005e-06	None - Full; RDI - Full	1.47647e+06	2.19303e+06	2.73676e+06	3.52332e+06	2.81172e+06	3.45466e+06	1.18808e+06	1.60846e+06	1.80438e+06	1.99985e+06	2.08889e+06	1.98948e+06	2.88621e+06	1.72059e+06	1.4028e+06	1.39245e+06	2.2125e+06	1.59444e+06	3.12379e+06	3.5918e+06	2.89869e+06	3.53854e+06	1.90119e+06	2.0668e+06	1.4606e+06	1.33551e+06	2.82209e+06	1.6273e+06	1.36005e+06	1.56691e+06	3.03191e+06	5.06167e+06	931157	996993	2.17973e+06	1.20428e+06	2.85523e+06	1.98285e+06	9114.44	4389.43	1.7473e+06	1.90095e+06	2.89112e+06	2.27749e+06	1.92385e+06
M61/ 1440	9.2492	0.00017338	0.00029266	None - Full; RDI - Full	1.51834e+06	1.33755e+06	878071	839453	1.19464e+06	1.4436e+06	1.18326e+06	1.14607e+06	2.37548e+06	2.07184e+06	3.25627e+06	2.79694e+06	2.07474e+06	1.83685e+06	3.02152e+06	2.79004e+06	1.70121e+06	1.38561e+06	706117	998347	657896	595495	644378	626837	1.32707e+06	1.39534e+06	3.40417e+06	2.54284e+06	1.10556e+06	1.07171e+06	543073	581954	2.87756e+06	2.76412e+06	2.75963e+06	2.51336e+06	1.58989e+06	1.402e+06	1327.67	790.799	0	0	2.18629e+06	2.08057e+06	0
M70/ 1100	8.0033	0.00052235	0.0008179	None - Full; RDI - Full	1.54018e+06	2.85855e+06	2.93862e+06	2.98368e+06	2.37209e+06	4.58729e+06	1.74889e+06	1.92273e+06	1.62008e+06	1.5998e+06	1.47603e+06	1.29308e+06	1.26794e+06	1.53714e+06	2.27302e+06	1.2267e+06	1.59786e+06	1.45046e+06	9.23611e+06	4.63902e+06	4.67732e+06	4.72243e+06	2.35419e+06	2.18232e+06	2.66829e+06	1.60728e+06	1.32186e+06	1.45265e+06	2.09206e+06	2.03234e+06	4.43923e+06	7.60886e+06	1.18732e+06	1.1937e+06	2.92065e+06	3.02332e+06	3.3773e+06	1.93715e+06	85644.2	123200	1.34083e+07	1.45692e+07	2.63724e+06	2.54701e+06	1.48577e+07
M51/ 1920	9.4238	0.00014876	0.00025564	None - Full; RDI - Full	1.55419e+06	1.43023e+06	1.18388e+06	1.20525e+06	1.23267e+06	1.08656e+06	1.21842e+06	1.34161e+06	1.50216e+06	1.63835e+06	1.33916e+06	1.37788e+06	1.01109e+06	1.11342e+06	1.04572e+06	1.10337e+06	1.12386e+06	1.07715e+06	1.31413e+06	1.27291e+06	1.02775e+06	1.07426e+06	1.23065e+06	1.22437e+06	1.13831e+06	1.28831e+06	975654	1.18819e+06	1.40252e+06	1.37745e+06	1.11734e+06	982970	1.06133e+06	1.06225e+06	1.14791e+06	1.11998e+06	1.05588e+06	1.06225e+06	157730	52984.8	1.26021e+06	1.21215e+06	1.2205e+06	1.21505e+06	1.1876e+06
M41/ 1440	3.4989	0.033044	0.042056	Full - RDI	1.56208e+06	1.36857e+06	1.52366e+06	1499500	2.48753e+06	1.47029e+06	1.21703e+06	1.0753e+06	2.43522e+06	512230	3.38887e+06	1.93647e+06	2.13056e+06	1.6223e+06	1.51139e+06	1.49443e+06	509503	1.37962e+06	1.47578e+06	2.5146e+06	1.90117e+06	2.06109e+06	1.42924e+06	623366	1.35306e+06	1.33617e+06	405218	698187	1.14662e+06	1.10078e+06	1.76431e+06	1.50458e+06	2.96656e+06	2.86451e+06	2.84041e+06	2.57358e+06	407100	1.44333e+06	1.53593e+06	950480	2.72915e+06	3.06542e+06	1.3277e+06	1.48195e+06	5.59282e+06
M71/ 1880	9.5968	0.00012787	0.00022377	None - Full; RDI - Full	1.59672e+06	2.81473e+06	1.45128e+06	1.80707e+06	579827	776849	2.08127e+06	1.01692e+06	2.59833e+06	2.37991e+06	2.42212e+06	1.31979e+06	922240	1.0859e+06	3.41907e+06	2.79189e+06	1.40718e+06	2.57363e+06	1.33085e+06	233763	358311	669832	1.15205e+06	1.49582e+06	3.19254e+06	1.70877e+06	88267.2	2.06073e+06	1.64179e+06	1.39989e+06	621238	256536	1.41681e+06	1.20745e+06	677840	1.30104e+06	373767	866325	2901.94	2918.83	331670	479685	603990	658145	379540
M77/ 1920	5.6433	0.0044424	0.0062193	None - Full	1.61202e+06	1.46835e+06	1.2143e+06	1.14187e+06	1.2596e+06	1.09663e+06	1.23916e+06	1.27042e+06	1.54331e+06	1.0149e+06	1.36906e+06	1.1852e+06	1.04116e+06	979950	1.04435e+06	1.03558e+06	1.05936e+06	1.02057e+06	976647	1.2077e+06	739463	1.05111e+06	796930	1.23374e+06	1.04446e+06	1.01153e+06	809316	1.01973e+06	1.45843e+06	1.41619e+06	1.15046e+06	1.01197e+06	1.08621e+06	1.07852e+06	1.18028e+06	1.13281e+06	1.08287e+06	1.08239e+06	147854	46579.8	1.29517e+06	66820.9	1.25338e+06	1.1542e+06	1.20117e+06
M55/ 1440	8.5294	0.00032716	0.00052611	None - Full; RDI - Full	1.77807e+06	1.53148e+06	948489	966389	1.38057e+06	1.43813e+06	1.37401e+06	1.17433e+06	2.45288e+06	918373	409478	2.20363e+06	1.8456e+06	903067	2.75878e+06	1.37848e+06	602681	1.17456e+06	703145	1.02469e+06	680074	529262	665208	535242	564789	1.29047e+06	3.00978e+06	1.17148e+06	1.29926e+06	1.23725e+06	649167	682397	3.42223e+06	2.67137e+06	3.02216e+06	2.25893e+06	1.70365e+06	1.63494e+06	2213.25	1375.3	159909	95400.2	1.73839e+06	1.53579e+06	506864
M70/ 1440	6.1708	0.0027366	0.0039235	None - Full	1.94784e+06	1.70111e+06	1.12075e+06	1.06167e+06	1.47455e+06	1.84265e+06	1.49402e+06	1.33004e+06	3.08582e+06	2.28087e+06	3.51983e+06	3.03684e+06	2.69023e+06	94672.4	2.14978e+06	91584.2	1.92796e+06	1.66523e+06	868329	1.27352e+06	752208	722600	84751.2	781187	1.69587e+06	1.75465e+06	1.66164e+06	2.25104e+06	1.40555e+06	1.36628e+06	691113	744315	3.80161e+06	3.65729e+06	3.61344e+06	3.10654e+06	2.0348e+06	1.80101e+06	1615.06	582.64	253568	310494	2.8191e+06	2.52288e+06	191422
M55/ 1350	6.402	0.0022154	0.0032261	Full - None; Full - RDI	1.98237e+06	1.16163e+06	1.5233e+06	987295	2.01707e+06	376493	1.30255e+06	65854.6	85613.9	1.77084e+06	103785	96987.5	51952.3	53214.8	1.20061e+06	72276.4	1.92951e+06	844706	351281	79335.9	1.12094e+06	73645.6	1.67166e+06	65711.3	219446	56689.5	43654.1	1.53567e+06	2.21649e+06	1.23919e+06	1.73686e+06	1.21629e+06	1.56387e+06	1.504e+06	1.45038e+06	1.41963e+06	1.05947e+06	1.11452e+06	85899.8	26275.7	797998	903254	96047.2	1.27553e+06	667121
M43/ 1220	6.0965	0.0029293	0.0041747	None - Full; None - RDI	2.07895e+06	1.49621e+06	960162	897055	968829	871544	1.2218e+06	1.277e+06	2.95893e+06	2.35871e+06	131858	2.41378e+06	1.69338e+06	66423.7	2.90638e+06	1.60419e+06	1.70314e+06	1.733e+06	754344	861387	687870	718419	43734.2	1.1178e+06	1.31453e+06	69332.2	1.77466e+06	48637.4	66018.4	1.23809e+06	2.57734e+06	815791	2.33139e+06	66150.4	2.2824e+06	2.26139e+06	1.20022e+06	1.24525e+06	22509.3	14105.5	754451	1.68422e+06	1.80174e+06	1.46863e+06	685642
M73/ 1440	12.177	1.3926e-05	3.2815e-05	None - Full; RDI - Full	2.08264e+06	1.79985e+06	1.19102e+06	1.13458e+06	1.6033e+06	1.96026e+06	1.60795e+06	1.55286e+06	3.27202e+06	2.84985e+06	4.6138e+06	3.90904e+06	2.8781e+06	2.53697e+06	4.24585e+06	3.92307e+06	2.32415e+06	1.88921e+06	955646	1.39305e+06	898875	825000	894015	851799	1.80522e+06	1.89239e+06	4.81235e+06	3.55629e+06	1.52935e+06	1.46838e+06	756819	793261	4.02406e+06	3.88438e+06	3.90651e+06	3.48986e+06	2.17207e+06	1.92841e+06	3578.15	1643.04	304242	349912	3.05807e+06	2.90077e+06	317155
M42/ 1450	3.8869	0.022879	0.030001	Full - None; RDI - None	2.1479e+06	911343	5.30595e+06	5.20143e+06	8.84967e+06	2.79311e+06	2.78883e+06	3.28901e+06	3.7744e+06	2.59301e+06	1.04941e+06	943366	2.85571e+06	3.76404e+06	430531	1.49383e+06	2.43516e+06	1.90074e+06	7.01044e+06	7.07852e+06	9.63662e+06	6.64371e+06	5.0932e+06	4.09932e+06	1.05256e+06	3.86909e+06	1.83791e+06	3.39565e+06	4.35711e+06	3.69222e+06	8.88029e+06	5.17223e+06	1.78181e+06	3.19311e+06	1.81653e+06	1.68687e+06	1.607e+06	3.43028e+06	5.81382e+06	4.00759e+06	1.60103e+06	89724.2	6.88871e+06	5.08628e+06	9.9971e+06
M99/ 1220	10.767	4.6361e-05	9.3114e-05	None - Full; RDI - Full	2.17939e+06	1.81166e+06	1.12203e+06	1.1374e+06	332696	1.18509e+06	1.56371e+06	1.67042e+06	3.85507e+06	3.10712e+06	2.92128e+06	4.68061e+06	2.22236e+06	1.5724e+06	4.36923e+06	3.58182e+06	2.57973e+06	2.32575e+06	1.02728e+06	1.08701e+06	919570	936055	1.0244e+06	1.27567e+06	1.78455e+06	2.11123e+06	2.64896e+06	1.85502e+06	1.00898e+06	1.34462e+06	731125	997978	2.61032e+06	1.96688e+06	2.86226e+06	2.98613e+06	1.52637e+06	1.72985e+06	4456.36	594.028	744600	902072	1.91966e+06	1.98777e+06	782117
M45/ 1580	10.982	3.8517e-05	7.9027e-05	Full - None; RDI - None	2.22651e+06	485029	3.4155e+06	2.13519e+06	4.4919e+06	1.29793e+06	1.39511e+06	3.72046e+06	2.37157e+06	2.91523e+06	1.24466e+06	1.65106e+06	1.87851e+06	3.74409e+06	580787	1.33998e+06	2.34732e+06	890981	3.09185e+06	2.51919e+06	3.36669e+06	3.95032e+06	3.59584e+06	2.02408e+06	296929	1.80684e+06	848558	1.82137e+06	4.16625e+06	1.76839e+06	3.87413e+06	1.31597e+06	1.37472e+06	1.63234e+06	1.6154e+06	1.04469e+06	833411	1.29746e+06	3.26393e+06	1.17358e+06	2.68256e+06	3.70269e+06	3.57296e+06	3.45282e+06	3.37098e+06
M127/ 1440	10.969	3.8962e-05	7.9597e-05	None - Full; RDI - Full	2.80972e+06	2.42266e+06	1.57489e+06	1.50186e+06	2.14821e+06	2.6519e+06	2.15511e+06	2.07746e+06	4.52138e+06	3.94439e+06	6.53954e+06	5.50808e+06	3.94717e+06	3.46926e+06	6.04823e+06	5.5177e+06	3.17899e+06	2.56013e+06	1.26219e+06	1.80905e+06	1.17194e+06	1.05678e+06	1.1409e+06	1.11282e+06	2.43068e+06	2.56544e+06	6.88845e+06	4.97035e+06	1.9795e+06	1.94118e+06	947402	1.03872e+06	5.6654e+06	5.45919e+06	5.38061e+06	4.86614e+06	2.92551e+06	2.58792e+06	1131.87	573.697	423158	469000	4.19865e+06	4.00455e+06	422210
M101/ 1640	12.04	1.5634e-05	3.6126e-05	None - Full; RDI - Full; None - RDI	2.92535e+06	3.47522e+06	2.12117e+06	2.82692e+06	3.64091e+06	5.01238e+06	1.98409e+06	2.14994e+06	4.51516e+06	3.83626e+06	5.82532e+06	3.54054e+06	5.45306e+06	2.70358e+06	3.3725e+06	3.60786e+06	3.79203e+06	2.58677e+06	2.14979e+06	2.5911e+06	2.48538e+06	2.48532e+06	1.40586e+06	1.61766e+06	2.01116e+06	2.30422e+06	1.79481e+06	2.37872e+06	1.28022e+06	1.32842e+06	1.38375e+06	2.3528e+06	3.22288e+06	3.12616e+06	5.20432e+06	2.54127e+06	5.02448e+06	3.21612e+06	6911.17	1679.61	1.06486e+06	1.08359e+06	3.08241e+06	2.43735e+06	747460
M88/ 1850	15.965	6.1047e-07	2.4178e-06	None - Full; RDI - Full	3.06318e+06	4.54413e+06	5.64934e+06	7.72808e+06	5.81983e+06	7.14809e+06	2.4675e+06	3.34152e+06	3.71543e+06	4.19453e+06	4.3076e+06	4.18735e+06	5.95578e+06	3.56333e+06	2.95463e+06	3.10183e+06	5.1453e+06	3.32697e+06	251835	6.12273e+06	4.25468e+06	6.02109e+06	4.15954e+06	4.33207e+06	3.07295e+06	2.93387e+06	4.9571e+06	3.6125e+06	2.8283e+06	3.2793e+06	6.2513e+06	1.03511e+07	1.93151e+06	2.0855e+06	4.49714e+06	2.48937e+06	5.89519e+06	4.11721e+06	11448.3	15100.2	3.62472e+06	3.93148e+06	5.9407e+06	4.72956e+06	4.0158e+06
M101/ 1440	9.4634	0.00014369	0.00024782	None - Full; RDI - Full	3.57142e+06	3.08426e+06	2.00965e+06	1.91245e+06	2.73319e+06	3.37899e+06	2.72775e+06	2.62007e+06	5.68084e+06	4.53801e+06	5.10844e+06	2.7846e+06	4.92105e+06	2.6417e+06	2.79823e+06	2.52461e+06	3.36045e+06	3.23017e+06	1.58413e+06	2.26729e+06	1.33497e+06	1.32532e+06	1.33896e+06	1.35091e+06	2.81138e+06	3.23349e+06	2.39393e+06	3.03183e+06	2.54462e+06	2.46762e+06	1.21621e+06	1.31224e+06	7.0561e+06	5.48095e+06	6.71705e+06	6.07516e+06	3.71221e+06	3.27592e+06	3678.54	1657.53	468341	521317	4.13891e+06	5.01878e+06	439236
M56/ 1350	3.9113	0.022358	0.029481	RDI - Full	3.91408e+06	2.59507e+06	2.27282e+06	2.96004e+06	3.73189e+06	2.48441e+06	2.79615e+06	3.26001e+06	5.1901e+06	3.98625e+06	5.37257e+06	3.92742e+06	3.13281e+06	3.21229e+06	2.83956e+06	3.76821e+06	4.21934e+06	3.54484e+06	3.0956e+06	2.99053e+06	2.50495e+06	2.40268e+06	3.40141e+06	2.8397e+06	2.55093e+06	3.93452e+06	2.36868e+06	3.13369e+06	1.73308e+06	3.51561e+06	878042	2.10315e+06	1.17225e+06	3.4997e+06	1.90638e+06	2.80606e+06	1.26339e+06	2.62231e+06	280442	66634.2	920515	1.71973e+06	3.80454e+06	3.4485e+06	2.19522e+06
M88/ 1220	10.699	4.9149e-05	9.7478e-05	None - Full; RDI - Full	4.41019e+06	3.67342e+06	2.27034e+06	2.1306e+06	2.53066e+06	2.27665e+06	2.93256e+06	3.04641e+06	6.92302e+06	5.57838e+06	4.32538e+06	5.88309e+06	3.98255e+06	2.05744e+06	6.10838e+06	1.91393e+06	4.61694e+06	4.26064e+06	1.86134e+06	1.97505e+06	1.6992e+06	1.72434e+06	1.51526e+06	2.39011e+06	3.22209e+06	3.67476e+06	4.7338e+06	11267.9	1.74978e+06	3.04793e+06	2.23533e+06	1.91268e+06	5.84544e+06	2.16892e+06	5.72496e+06	5.68336e+06	2.93086e+06	3.23045e+06	10097.4	7878.39	1.65938e+06	1.69469e+06	3.50614e+06	3.60824e+06	1.5843e+06
M45/ 1540	6.9265	0.0013754	0.002046	Full - None; RDI - None	4.93265e+06	843860	5.59673e+06	3.84741e+06	8.99295e+06	2.71415e+06	828009	8.82433e+06	4.15327e+06	8.40375e+06	1.40767e+06	5.246e+06	3.29569e+06	9.12475e+06	1.20955e+06	2.89658e+06	6.27728e+06	1.57252e+06	4.1869e+06	3.38669e+06	5.12451e+06	5.73942e+06	8.00885e+06	4.36198e+06	152668	4.46538e+06	722476	4.31598e+06	9.14582e+06	2.51976e+06	7.75011e+06	1.36779e+06	2.98725e+06	4.18514e+06	2.79471e+06	1.21741e+06	1.02862e+06	1.81016e+06	4.49862e+06	920540	3.4882e+06	4.459e+06	6.87803e+06	5.96186e+06	3.23267e+06
M65/ 1920	8.7665	0.00026524	0.00043687	None - Full; RDI - Full	4.93693e+06	4.52472e+06	3.7286e+06	3.77945e+06	3.85894e+06	3.40838e+06	3.8249e+06	4.24151e+06	4.75426e+06	3.75947e+06	4.22045e+06	3.53675e+06	3.18071e+06	3.28006e+06	3.28701e+06	3.46351e+06	3.24345e+06	3.39079e+06	3.53619e+06	4.02765e+06	3.21385e+06	3.37658e+06	3.49685e+06	3.58183e+06	3.2996e+06	3.4577e+06	2.85376e+06	3.43651e+06	4.44005e+06	4.36058e+06	3.50638e+06	3.08778e+06	3.34577e+06	3.35547e+06	3.6166e+06	3.52406e+06	3.31892e+06	3.34354e+06	492845	163839	3.99048e+06	3.83037e+06	3.85376e+06	3.83123e+06	3.75579e+06
M91/ 1790	6.9336	0.0013665	0.0020391	None - Full; RDI - Full	5.39213e+06	5.71601e+06	41956.8	9.53959e+06	6.64177e+06	6.46866e+06	4.57615e+06	4.9007e+06	4.33085e+06	4.31426e+06	1.93961e+06	1.97673e+06	3.56838e+06	2.57633e+06	1.54776e+06	1.56724e+06	2.70374e+06	3.13398e+06	2.49205e+07	1.87662e+07	1.30097e+07	1.28571e+07	7.39698e+06	3.97675e+06	2.40319e+06	51721	1.88882e+06	2.32768e+06	1.17058e+07	6.76735e+06	29213.9	5.74727e+06	1.90348e+06	1.7808e+06	3.42946e+06	3.40549e+06	5.77162e+06	5.51432e+06	342723	122410	2.09613e+07	2.18311e+07	9.32797e+06	1.14758e+07	2.5736e+07
M45/ 1210	3.3389	0.038474	0.048448	Full - None	5.4711e+06	4.08846e+06	4.09944e+06	3.55274e+06	6.20529e+06	3.88224e+06	4.52537e+06	4.12097e+06	777574	3.09102e+06	6.26685e+06	2.15152e+06	2.05097e+06	3.00409e+06	3.84767e+06	4.01811e+06	3.70866e+06	557956	2.7589e+06	2.96575e+06	3.92381e+06	3.40935e+06	3.31768e+06	3.9915e+06	390002	4.73169e+06	3.13491e+06	3.23033e+06	5.05833e+06	4.53111e+06	3.87391e+06	3.0817e+06	4.55565e+06	3.93591e+06	4.17937e+06	3.91089e+06	3.43526e+06	4.43269e+06	840813	305802	2.24832e+06	2.52916e+06	4.70641e+06	4.04103e+06	2.2452e+06
M122/ 1920	12.442	1.113e-05	2.7167e-05	None - Full; RDI - Full	5.96512e+06	6.53194e+06	3.35737e+06	4.37796e+06	2.74347e+06	5.11567e+06	4.29444e+06	6.91322e+06	6.54852e+06	9.49699e+06	6.04477e+06	7.49475e+06	3.24567e+06	6.60116e+06	5.39627e+06	5.68973e+06	6.4267e+06	5.43362e+06	7.69796e+06	6.99543e+06	5.61268e+06	5.88517e+06	7.1771e+06	6.10043e+06	6.28416e+06	7.58173e+06	5.3004e+06	6.63982e+06	7.65086e+06	4.81252e+06	6.94956e+06	1.89888e+06	6.11805e+06	3.34182e+06	4.58454e+06	3.41487e+06	1.56658e+06	3.32329e+06	879517	313950	3.64875e+06	5.00025e+06	6.05275e+06	5.94053e+06	5.90611e+06
M88/ 1640	13.567	4.3456e-06	1.1621e-05	None - Full; RDI - Full	6.99328e+06	8.30149e+06	5.06942e+06	6.84203e+06	8.67419e+06	5.68329e+06	4.79104e+06	5.18406e+06	9.87845e+06	5.90195e+06	8.95581e+06	6.73345e+06	6.31431e+06	6.0407e+06	4.85213e+06	5.5051e+06	3.98399e+06	6.21356e+06	5.28842e+06	6.17797e+06	5.90692e+06	6.42578e+06	3.52352e+06	3.87464e+06	5.61711e+06	5.54759e+06	3.16086e+06	3.35105e+06	3.07035e+06	3.21959e+06	3.31939e+06	5.613e+06	7.67391e+06	7.4415e+06	1.23023e+07	6.09494e+06	1.1001e+07	7.69234e+06	15908.7	4197.45	2.54091e+06	2.60363e+06	7.3345e+06	5.8387e+06	1.84204e+06
M88/ 1440	10.609	5.3102e-05	0.00010317	None - Full; RDI - Full	9.74424e+06	8.45242e+06	5.52876e+06	5.26768e+06	7.50321e+06	8.34088e+06	7.49875e+06	7.25125e+06	8.53613e+06	4.54623e+06	6.62514e+06	4.38008e+06	6.78964e+06	4.53709e+06	4.75511e+06	4.51797e+06	4.65119e+06	7.35935e+06	4.4288e+06	6.24317e+06	4.12338e+06	3.69764e+06	4.01873e+06	3.901e+06	6.04097e+06	6.37727e+06	2.94028e+06	3.81803e+06	6.97807e+06	6.77166e+06	3.36372e+06	3.6533e+06	1.18483e+07	7.43537e+06	1.11499e+07	8.38602e+06	1.01431e+07	8.95891e+06	9937.05	5618.29	1.30753e+06	1.31389e+06	6.02298e+06	7.0455e+06	1.23968e+06
M60/ 1450	5.2599	0.0063311	0.0087098	Full - None; RDI - None	1.14807e+07	4.48698e+06	3.57644e+07	3.46573e+07	4.48919e+07	1.92255e+07	1.89002e+07	2.26712e+07	2.15277e+07	1.44356e+07	4.28499e+06	5.01293e+06	1.61912e+07	2.16481e+07	2.13791e+06	8.40507e+06	1.35783e+07	1.04946e+07	4.60489e+07	3.99822e+07	6.1357e+07	3.7831e+07	3.69475e+07	2.89876e+07	5.59972e+06	2.89855e+07	1.02075e+07	1.94574e+07	3.18797e+07	2.59257e+07	5.67118e+07	3.46781e+07	9.7467e+06	3.64438e+06	9.65977e+06	8.88251e+06	9.93774e+06	2.3489e+07	3.33726e+07	2.34934e+07	2.82086e+07	3.35513e+07	4.53201e+07	3.35309e+07	5.58657e+07
M45/ 1450	5.8808	0.0035702	0.0050578	Full - None; RDI - None	1.2565e+07	4.94019e+06	3.86574e+07	3.7505e+07	4.66751e+07	2.08909e+07	2.05215e+07	2.45989e+07	2.34576e+07	1.57696e+07	6.22148e+06	5.51593e+06	1.76576e+07	2.34832e+07	2.37301e+06	9.20651e+06	1.48658e+07	1.15264e+07	4.98538e+07	3.36978e+07	6.62464e+07	4.07485e+07	4.00376e+07	3.14238e+07	6.16243e+06	3.14082e+07	1.11603e+07	2.1157e+07	3.44129e+07	2.80486e+07	6.1e+07	3.75283e+07	1.06811e+07	1.99497e+07	1.05269e+07	9.71994e+06	1.08461e+07	2.5435e+07	3.54649e+07	2.52145e+07	1.82128e+07	3.61306e+07	4.90086e+07	3.63777e+07	5.55138e+07
M43/ 1450	5.0354	0.0077978	0.010635	Full - None; RDI - None	1.35612e+07	5.41884e+06	4.14727e+07	4.01659e+07	6.08036e+07	2.30011e+07	2.19538e+07	2.62381e+07	2.47738e+07	1.67729e+07	6.5655e+06	5.94639e+06	1.87322e+07	2.48231e+07	2.57203e+06	9.75552e+06	1.58275e+07	1.22514e+07	4.81468e+07	3.15777e+07	7.03035e+07	4.38854e+07	4.22747e+07	3.33534e+07	6.59902e+06	3.31223e+07	1.19307e+07	2.24126e+07	3.65954e+07	3.0002e+07	6.49909e+07	3.61098e+07	1.13794e+07	2.11054e+07	1.1325e+07	1.0458e+07	1.17616e+07	2.7119e+07	3.73264e+07	2.64096e+07	3.00944e+07	6.12155e+07	5.20823e+07	3.89999e+07	5.44799e+07
M92/ 1920	10.821	4.4233e-05	8.9216e-05	None - Full; RDI - Full	1.84698e+07	1.70153e+07	1.384e+07	1.44583e+07	1.42376e+07	1.31234e+07	1.44916e+07	1.64315e+07	1.82742e+07	2.01972e+07	1.60383e+07	1.69237e+07	1.21093e+07	1.35136e+07	1.27167e+07	1.33657e+07	1.36252e+07	1.29543e+07	1.60579e+07	1.55272e+07	1.24679e+07	1.28731e+07	1.5095e+07	1.49132e+07	1.39613e+07	1.58159e+07	1.18406e+07	1.45224e+07	1.49498e+07	1.62032e+07	1.16986e+07	1.12038e+07	1.05347e+07	1.23058e+07	1.32702e+07	1.30357e+07	1.22418e+07	1.2502e+07	1.67461e+06	478106	1.47695e+07	1.43188e+07	1.44747e+07	1.45818e+07	1.43208e+07
M91/ 1920	14.125	2.738e-06	7.8988e-06	None - Full; RDI - Full	2.66527e+07	2.58536e+07	1.98276e+07	2.23818e+07	2.14488e+07	1.96868e+07	2.11798e+07	2.49637e+07	2.66092e+07	2.94924e+07	2.48297e+07	2.744e+07	1.85175e+07	2.21287e+07	2.01428e+07	2.1093e+07	2.24136e+07	2.0247e+07	2.58289e+07	2.44286e+07	2.02416e+07	2.04923e+07	2.4716e+07	2.33543e+07	2.2676e+07	2.51852e+07	1.86776e+07	2.36738e+07	2.2187e+07	2.47807e+07	1.68252e+07	1.66018e+07	1.59442e+07	1.7907e+07	1.92096e+07	2.01192e+07	1.79376e+07	1.91799e+07	3.25668e+06	1.17484e+06	2.17339e+07	2.27315e+07	2.2472e+07	2.1861e+07	2.25315e+07
[truncated: 91 more columns]

## Sheet: supplemental table 3
Table S3: List of the metabolic features that are significantly different between rootstocks in 2018.
Features	f.value	p.value	FDR	Fisher's LSD	10a2-1wine18	10a2-2wine18	10a3-1wine_18	10a3-2wine_18	10b3-1wine18	10b3-2wine18	10c2-1wine18	10c2-2wine18	10c3-1wine18real	10c3-2wine18	10d2-1wine18	10d2-2wine18	10d3-1wine18	10d3-2wine18	11a2-1wine18	11a2-2wine18	11a3-1wine_18	11a3-2wine_18	11b2-1wine18	11b2-2wine18	11b3-1wine18	11b3-2wine18	11c2-1wine18	11c2-2wine18	11c3-1wine18	11c3-2wine18	11d2-1wine18	11d2-2wine18	11d3-1wine18	11d3-2wine18	12a2-1wine18	12a2-2wine18	12a3-1wine_18	12a3-2wine_18	12b2-1wine18	12b2-2wine18	12b3-1wine18	12b3-2wine18	12c2-1wine18	12c2-2wine18	12c3-1wine18	12c3-2wine18	12d2-1wine18	12d2-2wine18	12d3-1wine18
M55/ 1110	5.9835	0.00075407	0.0021263	1103P - 3309C; 1103P - own; 1103P - so4	1.82691e+06	4.15182e+06	2.59822e+06	6.64302e+06	3.31264e+06	3.2069e+06	3.89104e+06	3.39382e+06	2.96372e+06	2.58749e+06	2.9797e+06	8.01671e+06	2.79119e+06	7.37401e+06	2.41285e+06	2.3695e+06	2.58421e+06	2.38988e+06	7.82002e+06	2.61506e+06	6.57791e+06	2.18528e+06	5.81495e+06	2.5663e+06	1.99595e+06	2.04293e+06	2.34086e+06	2.28264e+06	5.25707e+06	4.94073e+06	2.29765e+06	2.21561e+06	2.57911e+06	2.66393e+06	2.47551e+06	2.1486e+06	3.05568e+06	2.71578e+06	2.83658e+06	2.6319e+06	3.5515e+06	3.40329e+06	3.75917e+06	3.77128e+06	3.56191e+06
M70/ 1110	7.6625	9.465e-05	0.00031093	1103P - 3309C; 1103P - own; 1103P - so4	3.93655e+06	7.89892e+06	5.68466e+06	1.31374e+07	7.27353e+06	6.89008e+06	8.37838e+06	7.27358e+06	6.51738e+06	5.86189e+06	6.34711e+06	1.59808e+07	6.06445e+06	1.46333e+07	5.10372e+06	5.12994e+06	5.64536e+06	5.17533e+06	1.49593e+07	5.7485e+06	1.2921e+07	4.56151e+06	6.70226e+06	5.26116e+06	4.30078e+06	4.38467e+06	5.06401e+06	5.03498e+06	1.1265e+07	1.06155e+07	5.05758e+06	4.71632e+06	5.32182e+06	5.5799e+06	5.40033e+06	4.64383e+06	6.80425e+06	5.82119e+06	5.93184e+06	5.60407e+06	7.62167e+06	7.35599e+06	7.88069e+06	8.00139e+06	6.96118e+06
M61/ 1110	5.1618	0.0021171	0.0054762	1103P - 3309C; 1103P - own; so4 - own	617249	1.63066e+06	1.05603e+06	2.7022e+06	1.35794e+06	1.34091e+06	1.51241e+06	973413	1.11718e+06	992540	1.18795e+06	3.2474e+06	1.02792e+06	2.9178e+06	813161	950654	1.00541e+06	976585	2.8411e+06	944569	2.54898e+06	878474	1.23257e+06	829350	777256	736250	985130	945280	2.0596e+06	2.13028e+06	861811	877278	1.03335e+06	1.11091e+06	1.03984e+06	905346	1.25558e+06	1.07121e+06	1.06198e+06	953713	1.45398e+06	1.25265e+06	1.5189e+06	1.57029e+06	1.18039e+06
M69/ 1110	7.8948	7.1301e-05	0.00024023	1103P - 3309C; 1103P - own; 1103P - so4; so4 - own	310021	583434	390990	996022	629207	551080	716650	553334	547344	459201	433842	1.21686e+06	513528	1.16215e+06	312196	343095	478522	429942	1.12446e+06	479739	917342	294455	582645	443039	320857	295441	413769	434748	986996	868285	428690	356321	409584	459511	378132	361460	404627	424157	439224	384218	576100	528532	666549	554683	487246
M87/ 1110	6.3813	0.00045916	0.0013528	1103P - 3309C; 1103P - own	712263	1.22946e+06	940175	1.83769e+06	1.43422e+06	1.43578e+06	1.59364e+06	1.44368e+06	979926	1.20682e+06	1.07784e+06	2.60443e+06	1.01821e+06	2.26772e+06	731456	1.01956e+06	989743	1.02967e+06	1.98693e+06	1.10132e+06	2.01214e+06	899296	1.21838e+06	1.00363e+06	670771	865087	861140	913001	2.24496e+06	2.14769e+06	818244	834978	1.07594e+06	1.01851e+06	1.1118e+06	718047	1.35501e+06	1.05462e+06	1.03506e+06	977658	1.41071e+06	1.41261e+06	1.52477e+06	1.55126e+06	1.20192e+06
M73/ 1150	4.6988	0.0038028	0.009397	1103P - own; 1103P - so4; 3309C - own	2.47866e+06	8.81847e+06	3.96837e+06	2.73466e+06	4.3119e+06	2.40923e+06	2.97797e+06	1.00486e+07	3.11357e+06	3.86324e+06	5.21598e+06	4.84948e+06	1.19198e+07	2.6911e+06	1.07694e+07	7.6333e+06	1.47015e+07	7.47534e+06	4.70471e+07	7.98686e+06	4.06829e+07	8.2612e+06	2.0999e+07	1.03785e+07	9.41788e+06	4.63838e+06	7.62439e+06	1.33167e+07	9.50316e+06	1.34614e+07	8.35933e+06	1.29173e+07	8.43049e+06	6.94836e+06	8.82792e+06	1.73196e+07	7.57984e+06	1.35044e+07	7.4766e+06	5.86244e+06	8.6508e+06	6.54499e+06	1.60625e+07	7.01337e+06	1.7411e+07
M74/ 1150	4.7228	0.0036892	0.0091811	1103P - own; 1103P - so4; 3309C - own	203268	1.22326e+06	306264	637898	309315	315071	217840	1.12067e+06	227431	461653	1.03566e+06	894522	1.20867e+06	755699	821615	638599	1.20132e+06	548640	4.954e+06	641330	3.91024e+06	674279	1.77395e+06	1.94729e+06	1.96593e+06	278502	652643	1.63329e+06	786767	1.82502e+06	673430	1.91067e+06	748808	521585	685975	1.44239e+06	653281	1.34691e+06	621722	460286	670577	509265	1.95205e+06	1.68223e+06	2.03446e+06
M59/ 1150	3.6539	0.014371	0.030456	1103P - own	64802.7	521359	90412.8	232622	66172	124118	78123	511258	63693.1	181564	416995	366466	417792	252785	220250	169194	388961	205818	1.93132e+06	160495	1.49964e+06	185323	667640	732146	724219	91200.3	173472	645297	260227	595174	179421	736620	186157	199050	219846	533781	195888	507674	194710	158295	175310	218613	752986	615344	790057
M79/ 1210	3.8214	0.011607	0.02542	1103P - own; 3309C - own	3.07989e+06	2.67724e+06	3.20466e+06	2.95157e+06	3.44823e+06	3.45989e+06	4.41972e+06	4.97313e+06	3.30469e+06	4.48217e+06	4.02233e+06	3.27964e+06	3.75084e+06	3.06348e+06	3.0462e+06	3.41101e+06	1.79452e+06	3.18763e+06	2.38507e+06	1.99804e+06	2.67535e+06	1.88414e+06	5524.4	3.11016e+06	3.13385e+06	671852	3.67466e+06	3.39018e+06	1.54422e+06	2.8886e+06	2.50277e+06	2.74856e+06	1.68844e+06	24713.3	128454	3.23113e+06	1.27053e+06	3.08342e+06	1.39239e+06	3.25037e+06	2.30466e+06	1.43678e+06	3.85758e+06	3.31331e+06	3.20435e+06
M58/ 1210	3.8321	0.011451	0.025162	1103P - own; 3309C - own; so4 - own	5.56677e+06	5.16341e+06	5.34048e+06	4.68756e+06	4.2615e+06	4.65742e+06	5.19583e+06	5.56694e+06	687217	4.8288e+06	4.87148e+06	4.23909e+06	5.17237e+06	4.36198e+06	5.07338e+06	5.30074e+06	5.56428e+06	5.1649e+06	4.97107e+06	7.2718e+06	5.00659e+06	5.76239e+06	275000	4.7721e+06	5.03974e+06	5.98108e+06	5.26098e+06	5.14033e+06	6.71624e+06	5.32725e+06	4.98051e+06	6.24546e+06	6.313e+06	14586.6	5292.86	5.35846e+06	7.24301e+06	5.65949e+06	6.69257e+06	5.2126e+06	5.4031e+06	6.32795e+06	5.27018e+06	4.88543e+06	3.28186e+06
M70/ 1220	3.6596	0.014268	0.030337	1103P - own; 3309C - own; 3309C - so4	6.57088e+07	6.6841e+07	1.11534e+08	1.03531e+08	7.01537e+07	6.61725e+07	6.45515e+07	7.02982e+07	1.10228e+08	6.67351e+07	6.7136e+07	9.91709e+07	1.13177e+08	6.84428e+06	6.50058e+07	1.15201e+08	7.13429e+07	1.11289e+08	1.04408e+08	7.08549e+07	1.12341e+08	7.10271e+07	3.65027e+07	6.66434e+07	7.15796e+07	1.07331e+08	6.56758e+07	9.4067e+07	7.13369e+07	6.65306e+07	6.62101e+07	6.66691e+07	6.70124e+07	1.20728e+07	2.88613e+07	7.11536e+07	6.64453e+07	6.67473e+07	7.12142e+07	1.10324e+08	7.12275e+07	7.13325e+07	1.12644e+08	1.0794e+08	1.07392e+08
M69/ 1220	7.1118	0.00018593	0.00058171	1103P - own; 3309C - own; so4 - own	4.02676e+06	1.40889e+07	1.40483e+07	1.25884e+07	1.6363e+07	1.69879e+07	1.42386e+07	1.33487e+07	1.02341e+07	1.53011e+07	1.42097e+07	2.41951e+06	1.45095e+07	1.23389e+07	1.49326e+07	1.47908e+07	1.27284e+07	1.2372e+07	1.33962e+07	1.45382e+07	1.33872e+07	1.46606e+07	140012	1.63808e+07	1.60963e+07	1.28394e+07	1.54848e+07	1.4938e+07	1.28824e+07	1.60109e+07	1.60832e+07	1.48825e+07	1.41727e+07	2.42031e+06	5.9388e+06	1.51424e+07	3.81983e+06	1.59045e+07	1.80896e+07	1.46108e+07	1.67838e+07	1.64089e+07	1.40945e+07	1.32091e+07	1.26256e+07
M87/ 1220	4.6985	0.0038046	0.009397	3309C - own; so4 - own	2.82048e+06	5.95579e+06	996597	5.4584e+06	3.07669e+06	2.21538e+06	3.77365e+06	1.58339e+06	3.43597e+06	130489	3.29817e+06	3.3629e+06	2.60111e+06	2.69549e+06	1.48441e+06	2.59811e+06	3.75162e+06	2.19486e+06	755163	205130	3.93771e+06	5.01949e+06	34079	1.16866e+06	35242.4	3.55691e+06	2.25515e+06	4.72757e+06	823042	4.6757e+06	2.55699e+06	79885.7	2.40736e+06	3.30255e+06	6.01476e+06	4.14106e+06	6.18897e+06	6.45941e+06	5.68533e+06	2.46296e+06	698859	6.5742e+06	5.15407e+06	5.12313e+06	4.31293e+06
M45/ 1220	3.6679	0.014116	0.030112	1103P - own; so4 - own	1.05472e+07	1.88367e+07	1.02785e+07	1.93488e+07	1.25571e+07	2.56294e+07	790162	7.00963e+06	1.80818e+07	2.08206e+07	2.10044e+07	3.61816e+06	2.17902e+07	1.79879e+07	1.32737e+07	7.96012e+06	1.99154e+07	1.25404e+07	1.87645e+07	7.07269e+06	1.58826e+07	2.25358e+07	1.07862e+07	1.55211e+07	2.52841e+07	8.03438e+06	1.18626e+07	2.09321e+07	1.7216e+07	6.96907e+06	1.05338e+07	1.54505e+07	1.75229e+07	3.95941e+06	8.44449e+06	1.96714e+07	1.04706e+07	2.20659e+07	1.11419e+07	1.07128e+07	2.21371e+07	2.53167e+07	2.21485e+07	1.18901e+07	1.84993e+07
M104/ 1250	4.2275	0.0069199	0.015952	1103P - 3309C; 1103P - own	1.05989e+06	780459	1.27125e+06	1.07586e+06	1.66041e+06	1.40183e+06	1.41625e+06	1.14419e+06	1.51272e+06	1.30714e+06	1.06867e+06	1.00779e+06	1.35814e+06	1.2852e+06	1.51092e+06	1.42343e+06	1.16491e+06	1.07993e+06	1.56635e+06	1.51969e+06	1.9247e+06	1.63501e+06	123921	1.47689e+06	1.30984e+06	1.09974e+06	1.7209e+06	1.57317e+06	2.09089e+06	1.77518e+06	2.38363e+06	2.12091e+06	805242	764090	754085	1.81045e+06	1.31949e+06	999165	1.29992e+06	1.16444e+06	1.84208e+06	1.76687e+06	1.59686e+06	1.51712e+06	1.26793e+06
M103/ 1250	4.5724	0.0044644	0.010863	1103P - 3309C; 1103P - own; so4 - 3309C	568259	387264	525449	536312	775020	601529	663769	491160	699595	625650	490417	480882	578638	524208	704718	687526	599358	500339	682495	844651	845041	721868	514552	662025	584064	498817	784059	715062	848944	797175	1.07376e+06	903162	326839	336521	503514	780630	561345	535223	592506	517624	819038	804876	619252	686170	561830
M71/ 1250	3.8054	0.011847	0.025858	1103P - own; 3309C - own	1.90153e+06	1.91518e+06	1.99758e+06	1.97997e+06	2.13899e+06	1.92475e+06	1.98109e+06	1.76441e+06	2.10169e+06	2.18096e+06	2.10742e+06	2.19036e+06	1.91734e+06	2.07931e+06	2.64608e+06	2.65133e+06	2.50056e+06	2.35784e+06	2.97103e+06	2.583e+06	3.05279e+06	2.538e+06	102889	2.25551e+06	2.93434e+06	2.44539e+06	2.28192e+06	2.24457e+06	2.47978e+06	2.64177e+06	2.43692e+06	2.23539e+06	2.34845e+06	2.61928e+06	5.68166e+06	2.4681e+06	2.43627e+06	2.20711e+06	547179	2.35266e+06	2.57054e+06	46488.8	2.49313e+06	2.29567e+06	2.24734e+06
M58/ 1280	7.0411	0.00020286	0.00062571	1103P - 3309C; 1103P - own; 1103P - so4	2.42544e+06	2.34091e+06	2.69236e+06	2.61018e+06	2.78754e+06	2.77853e+06	2.56318e+06	2.43022e+06	2.88917e+06	2.66367e+06	2.72308e+06	2.77318e+06	2.65392e+06	2.65165e+06	2.18428e+06	2.24113e+06	2.12658e+06	2.01324e+06	2.36298e+06	2.19128e+06	2.36984e+06	2.13314e+06	2.6964e+06	1.98157e+06	2.28783e+06	2.10006e+06	1.94209e+06	1.87471e+06	1.97241e+06	2.09216e+06	2.06166e+06	1.8785e+06	2.12119e+06	2.13041e+06	2.33302e+06	2.05875e+06	2.1275e+06	1.78962e+06	2.16034e+06	2.06177e+06	2.26986e+06	2.19834e+06	2.0048e+06	1.87737e+06	1.8022e+06
M71/ 1320	7.9593	6.5923e-05	0.00022558	1103P - own; 1103P - so4; 3309C - own; 3309C - so4	602714	415318	437636	651210	402231	521024	164385	188131	147851	292762	532760	786882	540302	717889	303287	407131	354164	691671	244088	518456	560570	513973	360003	277600	185943	239538	407637	333873	379533	305735	625154	528079	862162	351263	207580	378743	416827	190402	28887.5	582424	20368.8	41275.1	355650	331597	416976
M56/ 1330	7.4392	0.00012438	0.00039717	own - 1103P; own - 3309C; own - so4	1.55739e+06	1.14906e+06	889352	655381	413704	818750	1.2216e+06	1.9472e+06	1.17925e+06	1.47194e+06	397582	502551	620709	320056	361583	442651	662701	1.22938e+06	550043	555611	582056	642974	82858.1	1.76889e+06	1.74548e+06	1.2392e+06	808725	846098	1.01356e+06	1.53275e+06	630230	978715	364893	471523	1.07874e+06	1.43492e+06	1.50897e+06	1.8678e+06	1.03579e+06	1.63379e+06	708328	622813	712726	661259	562314
M57/ 1330	5.3664	0.0016359	0.0043163	own - 1103P; own - 3309C; own - so4	256744	99447.1	249833	130899	85051.2	266548	404991	356037	133980	179338	177540	74277	98192	51537.5	269217	195195	249811	229858	128022	170765	143194	139851	106446	340084	390128	365567	189158	237275	373395	223040	140955	229221	144916	154725	418770	302162	235128	307753	164034	344955	56979.3	91874.6	129413	133662	40977.2
M148/ 1340	5.9576	0.0007789	0.0021869	1103P - own; 1103P - so4; 3309C - own	817322	1.19439e+06	812042	833871	593400	911929	838506	1.1187e+06	653954	784650	993917	1.11292e+06	862603	1.01923e+06	1.7918e+06	1.53172e+06	1.93777e+06	1.55649e+06	2.74072e+06	1.52591e+06	2.4425e+06	1.6197e+06	3.37487e+06	924388	1.58281e+06	1.28826e+06	1.62742e+06	1.44363e+06	1.50018e+06	1.43724e+06	1.42731e+06	1.44453e+06	1.5064e+06	1.20667e+06	1.35487e+06	1.38652e+06	1.38123e+06	1.04822e+06	925439	1.07284e+06	1.30079e+06	1.29248e+06	1.63868e+06	1.42241e+06	1.39252e+06
M193/ 1340	5.8936	0.00084385	0.0023492	1103P - own; 1103P - so4; 3309C - own	518898	817145	560694	625580	583735	596121	562358	781910	635962	527798	638532	790407	621773	595466	1.25697e+06	1.10237e+06	1.29455e+06	1.1929e+06	1.79657e+06	986748	1.7056e+06	1.05792e+06	2.50948e+06	671745	1.06114e+06	909377	1.143e+06	1.01676e+06	1.15327e+06	971240	1.11945e+06	1.10704e+06	1.07757e+06	942351	869619	910603	1.07251e+06	703512	849527	941373	1.06554e+06	957137	1.06681e+06	1.01918e+06	987768
M74/ 1340	8.4648	3.5737e-05	0.0001276	1103P - own; 1103P - so4; 3309C - own	1.56482e+06	2.44796e+06	1.92716e+06	2.07283e+06	1.98196e+06	1.98697e+06	1.98489e+06	2.18932e+06	2.02257e+06	1.86272e+06	2.26e+06	2.23339e+06	2.02974e+06	2.04286e+06	3.83688e+06	3.2126e+06	3.87757e+06	3.4356e+06	5.54917e+06	3.3812e+06	5.18525e+06	3.22831e+06	6.15282e+06	2.15209e+06	3.48745e+06	2.75633e+06	3.55929e+06	2.93084e+06	3.32152e+06	2.98543e+06	3.3347e+06	3.29304e+06	3.43188e+06	2.80041e+06	2.78975e+06	2.69855e+06	3.20267e+06	2.2843e+06	2.52268e+06	2.81853e+06	3.18936e+06	2.79241e+06	3.31006e+06	2.96427e+06	3.02125e+06
M59/ 1340	8.7491	2.5381e-05	9.3682e-05	1103P - 3309C; 1103P - own; 1103P - so4; 3309C - own	645401	996417	724917	824782	716943	645820	739172	865170	796644	715332	855049	811242	787407	815199	1.57167e+06	1.24256e+06	1.50908e+06	1.35261e+06	2.18576e+06	1.17095e+06	2.19123e+06	1.2825e+06	2.56245e+06	827053	1.19666e+06	1.0432e+06	1.36934e+06	960764	1.30175e+06	1.09524e+06	1.32551e+06	1.25797e+06	1.31465e+06	1.03224e+06	1.10616e+06	1.09519e+06	1.17189e+06	818303	967312	1.16391e+06	1.17711e+06	972325	1.27496e+06	1.12166e+06	1.24694e+06
M207/ 1340	7.4172	0.00012778	0.00040556	1103P - own; 1103P - so4; 3309C - own	1.87793e+06	2.65679e+06	1.95764e+06	2.23114e+06	2.09524e+06	2.17244e+06	2.24345e+06	2.3878e+06	2.40839e+06	2.10109e+06	2.38549e+06	2.46883e+06	2.19762e+06	2.20216e+06	4.14601e+06	3.2362e+06	4.3174e+06	3.58344e+06	5.98203e+06	3.73996e+06	5.53275e+06	3.43855e+06	1.18622e+07	2.17029e+06	3.67346e+06	2.93221e+06	3.68543e+06	3.08214e+06	3.55235e+06	3.07501e+06	3.3317e+06	3.42306e+06	3.65347e+06	3.06021e+06	2.85607e+06	2.91796e+06	3.35161e+06	2.23316e+06	2.7158e+06	2.95031e+06	3.38861e+06	3.02573e+06	3.36994e+06	3.18697e+06	3.08961e+06
M191/ 1340	6.2407	0.00054703	0.0015832	1103P - own; 1103P - so4; 3309C - own	717720	934634	644700	678072	776622	720167	827332	545731	589331	718286	865271	749613	550595	728367	1.41078e+06	839316	942556	1.28759e+06	1.96527e+06	701510	1.73e+06	1.34264e+06	2.98328e+06	790024	1.15397e+06	743568	1.37862e+06	1.09989e+06	1.07715e+06	969042	872178	1.1906e+06	790335	620706	988108	946517	1.28393e+06	807081	592715	1.03617e+06	1.16266e+06	591021	920843	1.16574e+06	1.08751e+06
M73/ 1340	4.3993	0.0055621	0.013192	1103P - own; 1103P - so4; 3309C - own	1.49283e+07	2.54815e+07	1.74907e+07	2.29803e+07	1.78923e+07	1.72259e+07	1.67579e+07	1.87858e+07	1.84898e+07	1.94089e+07	2.3002e+07	2.47269e+07	1.93932e+07	2.37629e+07	3.3539e+07	3.25345e+07	3.88421e+07	3.48177e+07	5.89183e+07	2.8662e+07	5.63057e+07	3.23844e+07	5.7878e+07	1.75955e+07	3.83391e+07	2.39799e+07	3.03897e+07	2.84325e+07	3.10181e+07	2.93781e+07	3.22136e+07	3.26397e+07	3.09775e+07	2.32319e+07	2.19534e+07	2.82715e+07	3.23888e+07	2.24447e+07	1.73414e+07	2.39969e+07	2.72601e+07	2.63338e+07	3.07385e+07	2.62965e+07	3.32693e+07
M41/ 1360	3.4999	0.01749	0.036262	1103P - own; 3309C - own	2.97256e+06	2.32563e+06	2.95088e+06	2.7858e+06	4.09762e+06	4.05703e+06	3.36597e+06	2.48408e+06	3.81095e+06	3.16019e+06	3.01707e+06	2.81326e+06	2.55732e+06	2.07195e+06	3.52281e+06	4.2573e+06	4.18367e+06	4.04248e+06	3.24218e+06	3.90791e+06	3.24323e+06	3.29234e+06	695031	2.51573e+06	3.03361e+06	3.43842e+06	2.09633e+06	2.0111e+06	2.50534e+06	2.11659e+06	2.26694e+06	1.92768e+06	3.11457e+06	4.61224e+06	3.21142e+06	2.09422e+06	2.52859e+06	2.52255e+06	3.23898e+06	2.90892e+06	3.46892e+06	1.72438e+06	3.00611e+06	2.29982e+06	2.07652e+06
M104/ 1360	7.7269	8.7495e-05	0.00029032	own - 1103P; so4 - 1103P; so4 - 3309C	432419	230710	370124	317841	172467	208263	228256	175330	246278	130927	385157	143569	288200	83691.8	12787.1	528496	10179	333106	6896.79	298576	3751.36	224551	21706.9	228571	208036	572233	179839	443746	112234	276093	202685	274897	40829.8	38617	215233	493739	180071	644690	339733	672650	257524	558954	156847	116383	436738
M87/ 1390	7.52	0.00011266	0.00036641	3309C - 1103P; own - 1103P; so4 - 1103P	1.04746e+06	532837	595960	396037	841912	665910	1.02866e+06	929890	1.11583e+06	1.20687e+06	404490	281835	289402	317848	889588	782400	1.08455e+06	873757	615087	42918.1	651523	583008	1.23603e+06	837310	887484	943209	674516	556716	1.15187e+06	689003	586913	478792	24899.9	278113	1.06216e+06	700708	874822	822070	963968	867403	726709	9108.04	602246	504319	322717
M151/ 1390	3.4997	0.017496	0.036262	3309C - own; so4 - own	736295	346813	698452	980473	831110	855212	1.41669e+06	1.28745e+06	720157	1.12728e+06	573606	484284	404391	673031	135339	1.97571e+06	156302	699449	687390	415868	802516	233226	410697	1.7575e+06	1.06936e+06	1.13316e+06	1.40927e+06	2.22717e+06	991605	1.50827e+06	603116	881848	336926	154024	61350.9	1.51994e+06	259179	1.95855e+06	321630	2.50279e+06	1.28531e+06	523516	3.31539e+06	1.72491e+06	1.16616e+06
M127/ 1440	3.9228	0.0102	0.022794	3309C - 1103P; so4 - 1103P	7.05799e+07	4.82886e+07	5.90901e+07	5.61146e+07	7.14403e+07	6.38066e+07	3.27203e+07	7.72553e+07	4.82247e+07	5.92651e+07	4.17074e+07	4.46643e+07	3.81216e+07	3.76341e+07	4.31664e+07	5.94971e+07	4.63251e+07	6.1459e+07	3.38672e+07	5.41803e+07	3.66653e+07	6.26266e+07	4.91627e+07	6.27905e+07	3.73494e+07	7.84087e+07	6.13074e+07	4.67572e+07	5.34777e+07	4.83481e+07	5.0042e+07	5.20189e+07	3.10279e+07	3.02384e+07	6.42546e+07	5.68366e+07	6.37103e+07	4.71857e+07	6.2099e+07	6.90215e+07	6.07654e+07	7.40453e+07	4.2753e+07	5.04921e+07	4.4604e+07
M58/ 1440	10.506	3.167e-06	1.4059e-05	3309C - 1103P; own - 1103P; so4 - 1103P; own - 3309C; own - so4	2.82279e+06	2.70192e+06	1.89609e+06	1.78339e+06	2.18101e+06	2.27046e+06	2.7992e+06	2.59201e+06	2.87411e+06	2.94534e+06	1.25962e+06	1.29221e+06	876253	1.16126e+06	2.44778e+06	1.83062e+06	2.54548e+06	2.18876e+06	2.3419e+06	1.32075e+06	2.38809e+06	2.76289e+06	3.182e+06	2.7461e+06	2.87272e+06	2.6058e+06	1.87021e+06	1.72749e+06	3.04954e+06	2.89006e+06	2.45865e+06	2.14036e+06	711513	733736	2.97105e+06	2.64999e+06	2.86471e+06	2.59078e+06	3.11873e+06	2.35145e+06	2.27765e+06	2.40606e+06	2.22674e+06	2.07516e+06	1.8983e+06
M128/ 1440	5.5665	0.0012718	0.0033968	3309C - 1103P; own - 1103P; so4 - 1103P	5.82075e+06	3.40937e+06	5.84784e+06	3.91397e+06	6.56765e+06	2.09465e+06	3.2258e+06	5.79176e+06	5.27242e+06	4.84996e+06	3.46348e+06	3.02879e+06	3.24714e+06	2.75278e+06	6.41052e+06	5.40014e+06	4.36324e+06	5.99943e+06	3.73083e+06	4.66232e+06	2.10392e+06	4.88769e+06	6.67411e+06	4.36311e+06	4.67932e+06	5.07138e+06	4.7483e+06	4.51187e+06	3.56645e+06	4.41662e+06	5.81141e+06	2.90265e+06	2.7806e+06	2.72057e+06	6.31272e+06	3.49248e+06	7.1707e+06	4.02506e+06	6.43295e+06	4.64916e+06	6.30907e+06	6.0686e+06	2.62127e+06	2.84359e+06	3.48066e+06
M56/ 1440	5.9978	0.00074076	0.0020978	own - 1103P; own - 3309C; own - so4	8.66603e+06	7.9279e+06	6.77682e+06	5.96244e+06	6.22909e+06	6.95655e+06	8.32042e+06	8.39348e+06	9.48966e+06	8.81505e+06	4.06822e+06	4.22202e+06	3.71035e+06	3.46707e+06	7.85267e+06	6.03668e+06	7.76165e+06	7.15663e+06	6.28291e+06	5.36262e+06	6.9951e+06	6.31274e+06	1.0814e+07	7.80308e+06	9.34491e+06	8.22882e+06	6.85831e+06	5.32676e+06	7.73491e+06	8.9662e+06	7.83501e+06	6.94994e+06	3.13914e+06	3.03079e+06	1.00118e+07	7.91752e+06	9.30027e+06	8.2471e+06	8.59895e+06	7.68493e+06	7.59896e+06	7.8452e+06	6.24411e+06	6.77912e+06	430778
M55/ 1440	15.099	1.7971e-08	1.4056e-07	3309C - 1103P; own - 1103P; so4 - 1103P; own - 3309C; own - so4	4.2125e+07	3.85573e+07	3.28044e+07	3.11716e+07	3.67e+07	3.43902e+07	4.24652e+07	4.09486e+07	4.61577e+07	4.50778e+07	1.9691e+07	2.07129e+07	1.79651e+07	1.73367e+07	3.82888e+07	3.14376e+07	3.76074e+07	3.64277e+07	3.26464e+07	2.63361e+07	3.40668e+07	3.11074e+07	5.24787e+07	4.20608e+07	4.52568e+07	4.21347e+07	3.32742e+07	2.89281e+07	4.89419e+07	4.38229e+07	4.0506e+07	3.37534e+07	1.537e+07	1.47598e+07	4.99348e+07	4.11883e+07	4.55203e+07	4.05679e+07	4.20505e+07	3.76941e+07	3.68605e+07	3.82007e+07	3.27858e+07	3.30271e+07	2.91568e+07
M97/ 1440	14.593	3.1189e-08	2.2033e-07	3309C - 1103P; own - 1103P; so4 - 1103P; own - 3309C; own - so4	1.08962e+07	1.0045e+07	8.28315e+06	7.72263e+06	9.29104e+06	8.59938e+06	1.08694e+07	1.06006e+07	1.2134e+07	1.14854e+07	4.76078e+06	5.01629e+06	4.45002e+06	4.24104e+06	9.70204e+06	7.64695e+06	9.31293e+06	8.30217e+06	8.22991e+06	6.33359e+06	8.32257e+06	7.44102e+06	1.28358e+07	1.07052e+07	1.14736e+07	1.02531e+07	8.16323e+06	7.16715e+06	1.16826e+07	1.07314e+07	9.79247e+06	8.50694e+06	3.34488e+06	2.79492e+06	1.29034e+07	1.03033e+07	1.1389e+07	1.00152e+07	9.95446e+06	9.21422e+06	8.96595e+06	9.21499e+06	7.97932e+06	8.27283e+06	7.11385e+06
M84/ 1440	14.901	2.2289e-08	1.6454e-07	3309C - 1103P; own - 1103P; so4 - 1103P; own - 3309C; own - so4	1.57603e+07	1.45135e+07	1.2049e+07	1.14367e+07	1.31921e+07	1.27375e+07	1.57958e+07	1.5255e+07	1.70747e+07	1.65709e+07	7.13025e+06	7.56215e+06	6.51976e+06	6.00009e+06	1.36231e+07	1.12884e+07	1.35886e+07	1.32051e+07	1.21022e+07	9.30957e+06	1.24366e+07	1.10436e+07	1.85662e+07	1.55867e+07	1.65695e+07	1.51501e+07	1.17545e+07	1.04941e+07	1.79449e+07	1.61423e+07	1.44397e+07	1.21718e+07	5.34284e+06	4.41258e+06	1.81566e+07	1.46687e+07	1.64636e+07	1.47836e+07	1.47078e+07	1.34975e+07	1.3158e+07	1.36933e+07	1.19094e+07	1.2005e+07	1.02857e+07
M69/ 1440	14.873	2.2992e-08	1.6784e-07	3309C - 1103P; own - 1103P; so4 - 1103P; own - 3309C; own - so4	1.70544e+07	1.56971e+07	1.30787e+07	1.2591e+07	1.47436e+07	1.38586e+07	1.72492e+07	1.65972e+07	1.88444e+07	1.85086e+07	7.81349e+06	8.326e+06	7.11423e+06	6.91982e+06	1.54251e+07	1.27376e+07	1.50812e+07	1.45926e+07	1.31724e+07	1.02428e+07	1.38747e+07	1.22504e+07	2.09153e+07	1.70397e+07	1.80982e+07	1.68639e+07	1.32119e+07	1.15652e+07	1.97405e+07	1.7687e+07	1.60447e+07	1.35983e+07	5.78034e+06	5.65304e+06	1.96523e+07	1.643e+07	1.82721e+07	1.63051e+07	1.66926e+07	1.50807e+07	1.46943e+07	1.51491e+07	1.31558e+07	1.32237e+07	1.14108e+07
M70/ 1440	14.523	3.3687e-08	2.3055e-07	3309C - 1103P; own - 1103P; so4 - 1103P; own - 3309C; own - so4	6.27274e+07	5.86761e+07	4.97487e+07	4.76196e+07	5.52921e+07	5.23339e+07	6.27814e+07	6.1585e+07	6.79817e+07	6.79242e+07	3.02184e+07	3.22477e+07	2.77049e+07	2.72081e+07	5.55655e+07	4.74631e+07	5.49566e+07	5.45397e+07	4.89966e+07	3.93469e+07	5.10785e+07	4.64332e+07	7.52838e+07	6.28386e+07	6.65586e+07	6.29191e+07	4.92072e+07	4.36747e+07	7.23335e+07	6.55293e+07	5.99857e+07	5.10577e+07	2.28949e+07	2.1942e+07	7.09642e+07	6.12887e+07	6.69588e+07	6.09023e+07	6.18079e+07	5.6692e+07	5.46035e+07	5.71325e+07	4.88177e+07	4.98383e+07	4.39818e+07
M90/ 1440	4.2286	0.0069103	0.015952	own - 1103P; own - so4	2.01771e+06	1.90362e+06	1.52168e+06	1.34206e+06	1.74138e+06	1.82859e+06	2.10756e+06	2.13306e+06	2.33212e+06	2.15412e+06	1.05475e+06	913117	917359	896411	2.22278e+06	1.68271e+06	1.84274e+06	1.80993e+06	1.62468e+06	1.25279e+06	1.09889e+06	1.59904e+06	2.58391e+06	1.81134e+06	2.20707e+06	2.41082e+06	1.5625e+06	1.26455e+06	2.3599e+06	2.26679e+06	2.04669e+06	1.76267e+06	734579	703347	2.40515e+06	1.78887e+06	2.26152e+06	1.91694e+06	2.1624e+06	1.79841e+06	1.76121e+06	1.92168e+06	1.71747e+06	1.64367e+06	1.40199e+06
M44/ 1440	16.913	2.5833e-09	2.4959e-08	3309C - 1103P; own - 1103P; so4 - 1103P; own - 3309C; own - so4	1.6077e+06	1.52743e+06	1.37126e+06	1.24555e+06	1.43257e+06	1.35015e+06	1.68862e+06	1.55741e+06	1.78256e+06	1.78662e+06	768853	803135	725242	566434	1.31633e+06	1.17273e+06	1.44823e+06	1.31938e+06	1.35756e+06	851986	1.36438e+06	1.15842e+06	1.90075e+06	1.69843e+06	1.7917e+06	1.60866e+06	1.33708e+06	1.16383e+06	1.97291e+06	1.66112e+06	1.49276e+06	1.17913e+06	609160	548778	1.71459e+06	1.48744e+06	1.84675e+06	1.51766e+06	1.71848e+06	1.3855e+06	1.51643e+06	1.50484e+06	1.34092e+06	1.33811e+06	1.19326e+06
M42/ 1440	15.076	1.8432e-08	1.4247e-07	3309C - 1103P; own - 1103P; so4 - 1103P; own - 3309C; own - so4	1.26027e+07	1.11565e+07	9.66789e+06	9.42114e+06	1.06842e+07	1.01253e+07	1.2951e+07	1.23787e+07	1.36428e+07	1.31017e+07	5.57118e+06	6.12916e+06	5.33312e+06	4.87302e+06	1.16932e+07	9.60209e+06	1.15306e+07	1.10968e+07	9.8181e+06	7.40699e+06	1.06166e+07	9.33435e+06	1.60736e+07	1.29318e+07	1.4087e+07	1.2883e+07	1.01717e+07	8.53157e+06	1.51922e+07	1.28887e+07	1.22877e+07	1.03558e+07	4.60112e+06	4.33614e+06	1.4841e+07	1.27941e+07	1.39758e+07	1.26107e+07	1.26883e+07	1.14614e+07	1.09739e+07	1.09904e+07	9.74355e+06	1.01304e+07	8.74159e+06
M68/ 1440	15.242	1.5398e-08	1.2489e-07	3309C - 1103P; own - 1103P; so4 - 1103P; own - 3309C; own - so4	2.09851e+06	2.02468e+06	1.65646e+06	1.59085e+06	1.74256e+06	1.7099e+06	1.76301e+06	2.10033e+06	2.38018e+06	2.18391e+06	927345	1.03616e+06	888890	810579	1.90303e+06	1.51318e+06	1.93404e+06	1.82364e+06	1.64483e+06	1.29555e+06	1.6498e+06	1.54502e+06	2.68545e+06	2.05697e+06	2.30899e+06	2.15724e+06	1.62922e+06	1.41222e+06	2.50109e+06	2.22487e+06	2.05996e+06	1.61527e+06	729753	697856	2.52313e+06	2.02766e+06	2.33854e+06	2.04366e+06	1.99039e+06	1.90422e+06	1.78813e+06	1.88202e+06	1.66948e+06	1.6683e+06	1.47568e+06
M110/ 1440	7.4382	0.00012453	0.00039717	own - 1103P; so4 - 1103P; own - 3309C	602579	584096	442369	455449	552313	476345	616370	658587	710650	737730	246562	288966	248286	228680	550259	408271	528892	563160	438636	383240	523502	410045	688463	541463	528156	580546	451451	413378	571229	535755	471104	466612	191345	184770	744445	614895	670928	622781	615202	549890	500553	556974	469704	468350	423705
M98/ 1440	15.335	1.3916e-08	1.1429e-07	3309C - 1103P; own - 1103P; so4 - 1103P; own - 3309C; own - so4	9.80755e+06	9.34696e+06	7.38217e+06	7.36709e+06	8.39693e+06	8.20391e+06	1.01405e+07	9.7559e+06	1.09024e+07	1.08288e+07	4.4671e+06	4.83487e+06	4.10257e+06	4.05258e+06	8.85674e+06	7.35084e+06	8.7242e+06	8.55852e+06	7.58455e+06	5.97248e+06	7.97805e+06	6.54591e+06	1.19044e+07	9.85366e+06	1.02572e+07	9.70463e+06	7.58811e+06	6.73115e+06	1.15288e+07	1.01271e+07	9.50338e+06	7.85523e+06	3.32713e+06	2.70354e+06	1.08657e+07	9.64421e+06	1.06548e+07	9.52285e+06	9.58582e+06	8.45346e+06	8.21954e+06	8.90729e+06	7.59136e+06	7.73005e+06	6.50462e+06
M146/ 1440	9.2814	1.3427e-05	5.2824e-05	3309C - 1103P; own - 1103P; so4 - 1103P; own - 3309C	582783	517282	442577	396963	476026	536030	419008	548103	401411	595030	184377	230647	195157	207772	512114	343264	457397	450387	459703	306160	441389	435255	712081	527961	559632	526280	335318	337761	634610	613952	579200	492990	137013	125745	569974	581023	686339	560215	556119	464131	457631	510216	387426	408750	378267
M82/ 1440	12.009	5.5859e-07	3.0081e-06	3309C - 1103P; own - 1103P; so4 - 1103P	3.57132e+06	3.21639e+06	2.4806e+06	2.63374e+06	3.06603e+06	2.77867e+06	3.56792e+06	3.25415e+06	3.78529e+06	3.74465e+06	1.46593e+06	1.59782e+06	1.3959e+06	1.40742e+06	3.17088e+06	2.29581e+06	3.06489e+06	2.97531e+06	2.55732e+06	1.94494e+06	2.74209e+06	3.54087e+06	3.99927e+06	3.53432e+06	3.56376e+06	3.39825e+06	2.50285e+06	2.06362e+06	3.84083e+06	3.42365e+06	3.25875e+06	2.84807e+06	936105	979847	4.06016e+06	3.19803e+06	3.52352e+06	3.28594e+06	3.18576e+06	2.95279e+06	2.9858e+06	2.89588e+06	2.47224e+06	2.64425e+06	2.3785e+06
M75/ 1440	11.852	6.6863e-07	3.432e-06	3309C - 1103P; own - 1103P; so4 - 1103P; own - 3309C	2.28039e+06	1.99145e+06	1.79397e+06	1.66796e+06	1.93136e+06	1.87185e+06	2.35604e+06	2.20004e+06	2.34148e+06	2.37977e+06	1.07052e+06	1.09942e+06	847140	872229	2.14182e+06	1.72545e+06	2.03055e+06	1.85254e+06	1.78395e+06	1.45515e+06	1.89742e+06	1.61435e+06	2.95265e+06	2.25466e+06	2.48694e+06	2.24917e+06	1.71705e+06	1.54077e+06	2.65378e+06	2.24833e+06	2.23763e+06	1.7835e+06	767991	792434	2.65463e+06	1.90953e+06	2.51207e+06	2.27801e+06	2.89994e+06	2.01763e+06	1.90524e+06	2.07021e+06	1.73822e+06	1.53144e+06	1.6357e+06
M89/ 1440	15.1	1.7948e-08	1.4056e-07	3309C - 1103P; own - 1103P; so4 - 1103P; own - 3309C; own - so4	2.68121e+07	2.45756e+07	2.06699e+07	1.9966e+07	2.33093e+07	2.1763e+07	2.67787e+07	2.59777e+07	2.92998e+07	2.86264e+07	1.24398e+07	1.32332e+07	1.12852e+07	1.10638e+07	2.3714e+07	1.964e+07	2.33181e+07	2.27218e+07	2.06087e+07	1.61901e+07	2.0183e+07	1.9178e+07	3.23588e+07	2.6429e+07	2.83069e+07	2.61731e+07	2.05417e+07	1.81609e+07	3.03857e+07	2.75416e+07	2.51256e+07	2.12053e+07	9.16674e+06	8.76936e+06	2.9861e+07	2.56715e+07	2.82912e+07	2.53286e+07	2.5827e+07	2.3345e+07	2.28324e+07	2.36957e+07	2.03289e+07	2.07161e+07	1.83203e+07
M126/ 1440	5.5768	0.0012553	0.0033664	3309C - 1103P; own - 1103P; so4 - 1103P	759051	753327	555255	586200	669990	619745	795019	794740	870125	836334	351467	400707	310580	319886	705872	560736	642929	669093	560420	447190	614806	495308	986569	757287	795487	779295	570955	514554	883223	691772	696304	619966	230656	220885	853064	761019	799172	752102	743007	674636	626442	659355	555035	594205	495660
M102/ 1440	15.49	1.1783e-08	1.0054e-07	3309C - 1103P; own - 1103P; so4 - 1103P; own - 3309C; own - so4	1.21971e+07	1.12517e+07	9.35259e+06	9.04294e+06	1.05185e+07	9.92639e+06	1.22709e+07	1.19088e+07	1.33152e+07	1.30747e+07	5.56702e+06	5.93662e+06	4.99124e+06	4.88137e+06	1.06543e+07	8.80119e+06	1.06025e+07	1.01542e+07	9.19399e+06	7.1932e+06	9.00673e+06	8.5001e+06	1.48577e+07	1.20457e+07	1.27199e+07	1.19694e+07	9.23671e+06	8.21284e+06	1.37974e+07	1.25554e+07	1.12967e+07	9.65423e+06	4.02899e+06	3.81215e+06	1.36425e+07	1.17938e+07	1.28503e+07	1.1435e+07	1.15968e+07	1.07275e+07	1.02684e+07	1.079e+07	9.21872e+06	9.27701e+06	8.17337e+06
M60/ 1440	14.559	3.2372e-08	2.2626e-07	3309C - 1103P; own - 1103P; so4 - 1103P; own - 3309C; own - so4	6.0264e+07	5.56199e+07	4.80177e+07	4.53453e+07	5.31036e+07	4.98988e+07	6.00173e+07	5.86833e+07	6.51153e+07	6.45111e+07	2.90852e+07	3.06502e+07	2.65606e+07	2.59339e+07	5.35412e+07	4.58203e+07	5.30527e+07	5.25705e+07	4.70648e+07	3.84568e+07	4.9068e+07	4.46859e+07	7.31632e+07	5.99868e+07	6.41333e+07	6.02134e+07	4.75667e+07	4.20137e+07	6.95615e+07	6.25467e+07	5.77848e+07	4.82664e+07	2.25957e+07	2.16494e+07	6.79213e+07	5.86546e+07	6.46994e+07	5.79126e+07	5.99291e+07	5.42602e+07	5.32485e+07	5.49599e+07	4.70662e+07	4.78103e+07	4.24209e+07
M116/ 1440	13.718	8.1763e-08	5.116e-07	3309C - 1103P; own - 1103P; so4 - 1103P; own - 3309C; own - so4	3.24882e+06	3.11963e+06	2.41115e+06	2.48135e+06	2.56532e+06	2.6887e+06	3.26202e+06	3.15793e+06	3.6008e+06	3.66128e+06	1.49049e+06	1.47996e+06	1.37475e+06	1.28885e+06	2.80426e+06	2.30027e+06	2.83375e+06	2.86165e+06	2.46933e+06	1.79215e+06	2.55577e+06	2.28557e+06	3.91043e+06	3.29002e+06	3.49523e+06	3.28709e+06	2.38127e+06	2.17382e+06	3.53169e+06	3.41916e+06	2.91245e+06	2.58722e+06	1.01013e+06	1.00398e+06	3.7717e+06	3.17439e+06	3.43182e+06	3.03148e+06	3.16444e+06	2.75262e+06	2.63117e+06	2.71313e+06	2.49253e+06	2.50647e+06	2.07304e+06
M74/ 1440	14.976	2.0547e-08	1.5517e-07	3309C - 1103P; own - 1103P; so4 - 1103P; own - 3309C; own - so4	9.35731e+06	8.73985e+06	7.24083e+06	6.91833e+06	8.16836e+06	7.6817e+06	9.44798e+06	9.13232e+06	1.03343e+07	9.99572e+06	4.39712e+06	4.5978e+06	4.01189e+06	3.73593e+06	8.40144e+06	6.90243e+06	8.28869e+06	8.0602e+06	7.26298e+06	5.72708e+06	7.63199e+06	6.81183e+06	1.14986e+07	9.29796e+06	9.99986e+06	9.39341e+06	7.235e+06	6.40386e+06	1.08186e+07	9.71316e+06	8.87926e+06	7.53081e+06	3.26921e+06	3.10868e+06	1.05889e+07	9.09643e+06	1.01114e+07	8.92381e+06	9.21578e+06	8.34093e+06	8.0969e+06	8.38073e+06	7.1231e+06	7.27363e+06	6.38321e+06
M73/ 1440	14.531	3.3399e-08	2.3055e-07	3309C - 1103P; own - 1103P; so4 - 1103P; own - 3309C; own - so4	6.95699e+07	6.63291e+07	5.50677e+07	5.24028e+07	6.08897e+07	5.8386e+07	6.99322e+07	6.92622e+07	7.61979e+07	7.51292e+07	3.38487e+07	3.65341e+07	3.05666e+07	3.05728e+07	6.14805e+07	5.27205e+07	6.06124e+07	5.93349e+07	5.46173e+07	4.30595e+07	5.69432e+07	5.10593e+07	8.37235e+07	6.88512e+07	7.32331e+07	7.10391e+07	5.25439e+07	4.6996e+07	8.1265e+07	7.2294e+07	6.53921e+07	5.77774e+07	2.31211e+07	2.3172e+07	7.476e+07	6.65258e+07	7.39319e+07	6.75394e+07	6.82718e+07	6.35408e+07	6.06223e+07	6.41262e+07	5.4043e+07	5.54335e+07	4.93625e+07
M103/ 1440	13.801	7.458e-08	4.7572e-07	3309C - 1103P; own - 1103P; so4 - 1103P; own - 3309C; own - so4	1.59421e+06	1.44296e+06	1.1658e+06	1.09756e+06	1.25614e+06	1.22365e+06	1.62615e+06	1.53051e+06	1.72184e+06	1.75987e+06	739500	750870	666378	605896	1.35141e+06	1.11189e+06	1.36657e+06	1.18696e+06	1.2156e+06	959583	1.22194e+06	960554	1.78749e+06	1.56988e+06	1.60339e+06	1.55439e+06	1.17498e+06	975971	1.75608e+06	1.59564e+06	1.4494e+06	1.26213e+06	507623	479029	1.69312e+06	1.45309e+06	1.62699e+06	1.48245e+06	1.40778e+06	1.36549e+06	1.31209e+06	1.46047e+06	1.13512e+06	1.15845e+06	894629
M144/ 1440	5.3239	0.0017258	0.0045173	3309C - 1103P; own - 1103P; own - so4	2.42004e+06	2.24848e+06	1.77317e+06	1.7288e+06	1.92572e+06	1.92734e+06	2.44946e+06	2.38856e+06	2.68903e+06	2.63692e+06	1.07111e+06	1.0467e+06	881049	928085	2.10747e+06	1.84671e+06	1.97661e+06	2.01082e+06	1.88807e+06	1.34129e+06	1.78777e+06	1.59462e+06	3.00584e+06	2.50362e+06	2.48945e+06	2.45254e+06	1.70013e+06	1.57092e+06	2.5825e+06	2.56244e+06	2.24212e+06	1.88764e+06	659678	576323	2.36161e+06	2.35341e+06	2.50476e+06	2.15203e+06	2.31164e+06	2.03578e+06	1.96968e+06	2.05072e+06	1.8092e+06	1.83532e+06	1.56959e+06
M130/ 1440	11.894	6.3729e-07	3.3816e-06	3309C - 1103P; own - 1103P; so4 - 1103P; own - 3309C	4.56201e+06	4.1758e+06	3.46861e+06	3.1667e+06	3.86149e+06	3.7697e+06	4.68543e+06	4.50246e+06	4.91636e+06	4.93326e+06	2.04784e+06	2.1808e+06	1.69234e+06	1.72304e+06	4.05715e+06	3.12076e+06	3.78754e+06	3.82322e+06	3.47608e+06	2.70259e+06	3.64775e+06	3.13838e+06	5.35029e+06	4.45398e+06	4.7807e+06	4.52778e+06	3.27408e+06	3.00467e+06	5.15117e+06	4.74562e+06	4.14417e+06	3.48239e+06	1.29378e+06	1.07645e+06	4.92007e+06	4.36704e+06	4.72737e+06	4.3708e+06	4.05556e+06	3.97917e+06	3.79438e+06	3.70967e+06	3.35041e+06	3.539e+06	3.03413e+06
M67/ 1440	15.171	1.6635e-08	1.3328e-07	3309C - 1103P; own - 1103P; so4 - 1103P; own - 3309C; own - so4	7.58022e+06	7.12005e+06	5.82277e+06	5.61151e+06	6.55065e+06	6.1644e+06	7.7223e+06	7.47267e+06	8.42339e+06	8.28676e+06	3.46841e+06	3.69563e+06	3.07007e+06	2.9192e+06	6.88541e+06	5.6001e+06	6.82141e+06	6.55008e+06	5.84384e+06	4.57248e+06	6.24489e+06	5.4864e+06	9.19413e+06	7.71202e+06	8.02388e+06	7.46132e+06	5.79184e+06	5.13298e+06	8.88796e+06	7.97039e+06	7.11986e+06	6.02646e+06	2.44939e+06	2.18702e+06	8.77304e+06	7.52381e+06	8.20896e+06	7.27134e+06	7.48969e+06	6.76906e+06	6.5495e+06	6.85897e+06	5.76299e+06	5.96854e+06	5.18785e+06
M172/ 1440	15.584	1.0643e-08	9.3235e-08	3309C - 1103P; own - 1103P; so4 - 1103P; own - 3309C; own - so4	6.40196e+06	5.80495e+06	4.80536e+06	4.67932e+06	5.4466e+06	5.2229e+06	6.48211e+06	6.30768e+06	7.12515e+06	6.83297e+06	2.81486e+06	2.9711e+06	2.3701e+06	2.30388e+06	5.69581e+06	4.49851e+06	5.55771e+06	5.43437e+06	4.73197e+06	3.7239e+06	4.91892e+06	4.48753e+06	7.44093e+06	6.39224e+06	6.58362e+06	6.42186e+06	4.74862e+06	4.2085e+06	7.17915e+06	6.53712e+06	5.87986e+06	4.66862e+06	1.89188e+06	1.75978e+06	7.16295e+06	6.24716e+06	6.81023e+06	6.04267e+06	6.15433e+06	5.54608e+06	5.2801e+06	5.69332e+06	4.75714e+06	4.79683e+06	4.19632e+06
M41/ 1440	15.468	1.2065e-08	1.0162e-07	3309C - 1103P; own - 1103P; so4 - 1103P; own - 3309C; own - so4	2.28674e+07	2.16049e+07	1.76377e+07	1.70289e+07	1.99798e+07	1.85819e+07	2.37159e+07	2.2583e+07	2.56046e+07	2.52754e+07	1.06551e+07	1.11649e+07	9.50589e+06	9.06854e+06	2.14865e+07	1.73897e+07	1.94181e+07	2.01953e+07	1.83005e+07	1.40753e+07	1.91858e+07	1.64778e+07	2.9632e+07	2.3446e+07	2.55462e+07	2.33925e+07	1.83632e+07	1.60535e+07	2.73939e+07	2.45738e+07	2.22071e+07	1.86015e+07	8.38051e+06	7.91532e+06	2.7402e+07	2.28064e+07	2.50058e+07	2.24234e+07	2.32522e+07	2.04565e+07	2.04049e+07	2.072e+07	1.78936e+07	1.81973e+07	1.60913e+07
M59/ 1440	11.69	8.0481e-07	4.0989e-06	3309C - 1103P; own - 1103P; so4 - 1103P; own - 3309C; own - so4	3.06991e+06	2.80435e+06	2.2633e+06	2.24134e+06	2.51826e+06	947378	3.0873e+06	2.93271e+06	3.29795e+06	3.11209e+06	1.30317e+06	1.50467e+06	1.31924e+06	1.14686e+06	2.78674e+06	2.30636e+06	2.69299e+06	2.59591e+06	2.36953e+06	1.85393e+06	2.43679e+06	2.56782e+06	3.94944e+06	2.87297e+06	3.25419e+06	3.48033e+06	2.41626e+06	2.08081e+06	3.85016e+06	2.99251e+06	2.8504e+06	2.37039e+06	1.11732e+06	1.06474e+06	4.10305e+06	2.87392e+06	3.27894e+06	2.89059e+06	3.68328e+06	2.66585e+06	2.75209e+06	3.41932e+06	2.25418e+06	2.23072e+06	2.14152e+06
M145/ 1440	13.417	1.1431e-07	6.8276e-07	3309C - 1103P; own - 1103P; so4 - 1103P; own - 3309C; own - so4	5.58967e+06	5.58852e+06	3.67853e+06	4.42978e+06	3.6339e+06	2.83848e+06	6.11762e+06	4.92461e+06	6.72145e+06	6.15273e+06	1.28668e+06	2.97443e+06	1.52359e+06	2.44871e+06	5.30985e+06	3.30438e+06	5.2303e+06	4.04688e+06	4.22324e+06	2.90549e+06	5.36621e+06	3.64167e+06	5.6983e+06	5.60626e+06	5.97347e+06	6.44512e+06	3.87956e+06	3.7704e+06	7.53312e+06	6.8052e+06	4.89525e+06	4.36754e+06	1.14473e+06	840953	5.82684e+06	5.14841e+06	5.96192e+06	5.05982e+06	4.56391e+06	4.47995e+06	3.22507e+06	4.26044e+06	4.2779e+06	4.70069e+06	3.36358e+06
M79/ 1440	13.564	9.7011e-08	5.9566e-07	3309C - 1103P; own - 1103P; so4 - 1103P; own - 3309C; own - so4	1.78548e+06	1.66354e+06	1.11525e+06	1.14949e+06	1.2596e+06	952561	1.63586e+06	1.53686e+06	1.79671e+06	1.87122e+06	527922	611692	752158	594940	1.50316e+06	1.23896e+06	1.01688e+06	1.37677e+06	1.26152e+06	1.08262e+06	1.17792e+06	1.39663e+06	2.03999e+06	1.61532e+06	1.91706e+06	1.63845e+06	880963	1.04013e+06	1.99607e+06	1.34357e+06	1.59163e+06	1.38888e+06	418583	437253	1.732e+06	1.39992e+06	1.93926e+06	1.53043e+06	1.56767e+06	1.17979e+06	1.29638e+06	1.39757e+06	1.08526e+06	1.1452e+06	1.04851e+06
M99/ 1440	13.753	7.8682e-08	4.9706e-07	3309C - 1103P; own - 1103P; so4 - 1103P; own - 3309C; own - so4	1.20337e+06	1.14512e+06	949919	851853	1.04678e+06	985267	2.00962e+06	1.11867e+06	1.40645e+06	1.28241e+06	525489	568667	510742	490134	1.07346e+06	885197	1.07647e+06	991064	815137	739043	815479	811277	1.45715e+06	1.18795e+06	1.34191e+06	1.19284e+06	921089	712151	1.41335e+06	956129	1.13046e+06	957390	393797	377259	1.36501e+06	1.19431e+06	1.25101e+06	1.09943e+06	1.1131e+06	1.02847e+06	1.06084e+06	1.02932e+06	789312	927556	777420
M81/ 1440	9.8627	6.7395e-06	2.8384e-05	3309C - 1103P; own - 1103P; so4 - 1103P; own - 3309C	2.95773e+06	2.74682e+06	2.04576e+06	2.13651e+06	2.39179e+06	2.33188e+06	2.8203e+06	2.99967e+06	3.36919e+06	3.17011e+06	1.26177e+06	1.46925e+06	1.2303e+06	910393	2.85346e+06	2.14849e+06	2.61127e+06	2.37847e+06	2.24447e+06	1.76563e+06	2.37424e+06	2.20043e+06	3.70423e+06	2.91062e+06	3.21445e+06	2.89478e+06	2.27109e+06	2.10544e+06	3.27314e+06	2.99983e+06	2.82677e+06	2.26453e+06	948387	788055	2.99622e+06	2.95719e+06	2.97919e+06	2.84466e+06	2.91259e+06	2.43393e+06	2.35031e+06	2.73931e+06	2.27918e+06	2.2879e+06	1.8868e+06
M61/ 1440	14.346	4.0876e-08	2.7686e-07	3309C - 1103P; own - 1103P; so4 - 1103P; own - 3309C; own - so4	5.07991e+07	4.68281e+07	4.01049e+07	3.83554e+07	4.47319e+07	4.20776e+07	5.06055e+07	4.88204e+07	5.46533e+07	5.41631e+07	2.44533e+07	2.57875e+07	2.2269e+07	2.18415e+07	4.49926e+07	3.81662e+07	4.47115e+07	4.41077e+07	3.98519e+07	3.21897e+07	4.17149e+07	3.74916e+07	6.15307e+07	5.03444e+07	5.4287e+07	5.05398e+07	3.98266e+07	3.51673e+07	5.87265e+07	5.26874e+07	4.87469e+07	4.1245e+07	1.87279e+07	1.78835e+07	5.7172e+07	4.91846e+07	5.44719e+07	4.84984e+07	5.02693e+07	4.56122e+07	4.45198e+07	4.57329e+07	3.98099e+07	3.98955e+07	3.59399e+07
M109/ 1440	6.9902	0.00021599	0.00066003	3309C - 1103P; own - 1103P; so4 - 1103P; own - 3309C	5.82043e+06	6.52733e+06	5.26712e+06	4.28138e+06	4.74682e+06	5.00344e+06	6.79257e+06	6.2182e+06	7.03322e+06	7.2553e+06	2.27844e+06	2.85464e+06	2.37386e+06	1.89693e+06	6.50321e+06	4.41187e+06	6.20186e+06	5.69984e+06	5.07792e+06	3.40633e+06	5.34162e+06	4.20964e+06	7.89997e+06	5.37247e+06	6.815e+06	6.70503e+06	4.97738e+06	4.03526e+06	7.25832e+06	6.36788e+06	5.55611e+06	4.93133e+06	1.16712e+06	1.06158e+06	6.73286e+06	6.22671e+06	6.29442e+06	6.12301e+06	6.34771e+06	5.09247e+06	5.45127e+06	5.11439e+06	4.94634e+06	5.11165e+06	4.06587e+06
M53/ 1440	8.0066	6.224e-05	0.00021522	3309C - 1103P; own - 1103P; so4 - 1103P; own - 3309C	3.41411e+06	3.19154e+06	2.61421e+06	2.47432e+06	2.94159e+06	2.55142e+06	3.13291e+06	3.24387e+06	3.83426e+06	3.55025e+06	1.23173e+06	1.29232e+06	1.06386e+06	54299.9	2.80685e+06	2.55294e+06	2.70486e+06	2.8347e+06	1.84363e+06	1.98756e+06	2.12578e+06	2.47263e+06	4.03487e+06	3.35428e+06	3.68117e+06	3.42652e+06	2.58188e+06	2.22192e+06	3.94607e+06	3.23831e+06	3.10057e+06	2.66625e+06	1.01633e+06	1.18558e+06	3.81757e+06	3.28731e+06	3.62605e+06	3.15153e+06	3.1175e+06	2.83462e+06	2.89512e+06	2.59567e+06	1.95165e+06	2.63848e+06	2.34819e+06
M86/ 1440	5.738	0.0010254	0.0028189	own - 1103P; own - 3309C; own - so4	765446	702965	417533	510663	526061	477976	697313	563279	674179	679031	302115	311021	284976	167341	575627	438197	507803	509862	498633	258931	582561	385271	863097	632255	762617	625913	472581	340637	483591	696288	648772	406553	141217	177152	680236	666289	630520	637522	677781	592255	463968	521193	536492	34062	438211
M65/ 1440	11.546	9.4905e-07	4.7597e-06	3309C - 1103P; own - 1103P; so4 - 1103P; own - 3309C	720974	713899	560594	560330	644825	564224	756379	689324	708578	471704	335775	267596	264074	283988	575350	652246	700419	689588	435385	492201	550072	639925	972813	730185	821214	822038	572295	507230	694997	827687	654918	605898	290885	251979	893420	790289	915671	642731	687471	666428	618798	574983	522771	529781	495406
M54/ 1440	15.521	1.1388e-08	9.8444e-08	3309C - 1103P; own - 1103P; so4 - 1103P; own - 3309C; own - so4	1.85994e+06	1.70224e+06	1.47436e+06	1.37248e+06	1.634e+06	1.52071e+06	1.85916e+06	1.79455e+06	2.05023e+06	1.96636e+06	828875	874215	789952	742876	1.63519e+06	1.3822e+06	1.66544e+06	1.577e+06	1.45296e+06	1.12825e+06	1.47867e+06	1.30008e+06	2.34975e+06	1.87821e+06	1.98518e+06	1.86572e+06	1.45056e+06	1.24112e+06	2.13094e+06	1.91335e+06	1.7537e+06	1.48867e+06	637035	658155	2.19205e+06	1.79873e+06	1.97364e+06	1.75773e+06	1.85669e+06	1.65026e+06	1.62743e+06	1.68675e+06	1.42864e+06	1.44391e+06	1.25207e+06
M125/ 1440	9.3879	1.1827e-05	4.7531e-05	3309C - 1103P; own - 1103P; so4 - 1103P	4.55818e+06	4.24916e+06	3.52523e+06	3.38879e+06	3.59222e+06	3.60129e+06	4.11097e+06	3.9632e+06	4.18822e+06	4.01067e+06	1.8864e+06	1.64458e+06	1.6581e+06	1.45361e+06	3.90298e+06	2.69602e+06	3.42817e+06	3.10379e+06	3.14657e+06	2.37443e+06	3.38436e+06	3.10559e+06	5.23644e+06	4.37169e+06	4.86529e+06	4.18947e+06	3.1136e+06	2.80554e+06	5.05159e+06	4.25079e+06	3.79809e+06	3.39904e+06	908672	1.1512e+06	4.78012e+06	4.06804e+06	4.29259e+06	3.78849e+06	4.03643e+06	3.53481e+06	3.66957e+06	3.98121e+06	3.33293e+06	3.66226e+06	2.57069e+06
M83/ 1440	14.75	2.6265e-08	1.8963e-07	3309C - 1103P; own - 1103P; so4 - 1103P; own - 3309C; own - so4	1.83986e+07	1.71571e+07	1.41458e+07	1.34228e+07	1.5746e+07	1.49749e+07	1.87284e+07	1.80882e+07	2.0286e+07	1.98331e+07	8.33389e+06	8.93239e+06	7.42937e+06	7.30819e+06	1.62951e+07	1.33002e+07	1.60797e+07	1.56117e+07	1.40966e+07	1.09782e+07	1.47657e+07	1.31798e+07	2.19297e+07	1.83731e+07	1.95834e+07	1.81698e+07	1.4091e+07	1.22672e+07	2.09761e+07	1.92898e+07	1.73615e+07	1.46814e+07	6.04234e+06	5.79662e+06	2.10427e+07	1.77469e+07	1.9714e+07	1.7614e+07	1.7668e+07	1.63022e+07	1.54331e+07	1.63187e+07	1.40464e+07	1.42515e+07	1.23997e+07
M173/ 1440	16.043	6.502e-09	5.802e-08	3309C - 1103P; own - 1103P; so4 - 1103P; own - 3309C; own - so4	1.74257e+06	1.99378e+06	1.18742e+06	1.30904e+06	1.56632e+06	1.49863e+06	2.3359e+06	1.97395e+06	2.3745e+06	2.16526e+06	655195	764521	564032	539854	1.89079e+06	1.17532e+06	1.72882e+06	1.52945e+06	1.42236e+06	791640	1.36368e+06	1.14926e+06	2.30858e+06	2.15833e+06	2.14697e+06	1.82179e+06	1.24044e+06	1.15315e+06	2.16616e+06	2.05745e+06	1.62548e+06	1.44937e+06	255776	312590	2.07797e+06	2.00272e+06	1.75989e+06	1.98219e+06	1.63536e+06	1.31477e+06	1.29247e+06	1.50555e+06	1.40475e+06	1.51971e+06	1.02328e+06
M43/ 1440	6.4013	0.00044792	0.0013256	own - 1103P; so4 - 1103P; own - 3309C	2.46724e+07	2.289e+07	1.95135e+07	1.81086e+07	2.18404e+07	2.03583e+07	2.36662e+07	2.41476e+07	2.69345e+07	2.53295e+07	1.18761e+07	1.14987e+07	1.00624e+07	9.87895e+06	2.29249e+07	1.84471e+07	2.21238e+07	1.99061e+07	1.98206e+07	1.58116e+07	2.04708e+07	1.80066e+07	3.13653e+07	2.45861e+07	2.68668e+07	2.44128e+07	1.93131e+07	1.61816e+07	2.94884e+07	2.53805e+07	2.41042e+07	2.00603e+07	9.39375e+06	8.64799e+06	2.88281e+07	2.42766e+07	2.73785e+07	2.38997e+07	2.45721e+07	2.16655e+07	2.18183e+07	2.08185e+07	1.92362e+07	1.8333e+07	1.73595e+07
M45/ 1460	4.3309	0.0060675	0.014288	1103P - 3309C; 1103P - own; 1103P - so4	1.5479e+07	8.76094e+06	1.90195e+07	9.44763e+06	2.2548e+07	1.90286e+07	1.62283e+07	1.44762e+07	1.98615e+07	1.02799e+07	2.25048e+07	1.22688e+07	2.57056e+07	1.49829e+07	2.38249e+07	2.17039e+07	3.88272e+07	2.21761e+07	2.20426e+07	3.33137e+07	1.81312e+07	2.74447e+07	9.67709e+06	1.08988e+07	1.04739e+07	1.87384e+07	1.78224e+07	1.10306e+07	1.57381e+07	7.55692e+06	1.62207e+07	1.17165e+07	3.08904e+07	4.68353e+07	3.59909e+07	1.15394e+07	2.21397e+07	1.13458e+07	2.36366e+07	1.43417e+07	2.17257e+07	2.77632e+07	1.01338e+07	1.01912e+07	9.73685e+06
M44/ 1460	4.6431	0.0040815	0.010006	1103P - 3309C; 1103P - own; 1103P - so4	1.27354e+06	678888	1.56405e+06	801926	1.82099e+06	1.4877e+06	1.26703e+06	1.08901e+06	1.49875e+06	826947	1.62794e+06	915461	1.86742e+06	990103	1.84627e+06	1.62452e+06	2.84672e+06	1.78263e+06	1.51083e+06	2.47455e+06	1.44421e+06	2.04604e+06	995189	838258	997598	1.54289e+06	1.48693e+06	901149	1.22763e+06	737030	1.37182e+06	949698	2.37957e+06	3.44788e+06	2.83842e+06	1.07491e+06	1.8248e+06	912866	1.93906e+06	1.2009e+06	1.7256e+06	2.11878e+06	762639	801608	881998
M60/ 1460	3.7789	0.012254	0.026482	1103P - 3309C; 1103P - own; 1103P - so4	2.20129e+07	1.246e+07	2.67468e+07	1.33324e+07	3.16441e+07	2.71205e+07	2.28659e+07	2.03222e+07	2.83504e+07	1.46261e+07	3.17079e+07	1.76405e+07	3.6212e+07	2.14804e+07	3.22712e+07	2.99022e+07	5.21011e+07	3.07942e+07	3.03797e+07	4.56776e+07	2.5183e+07	3.73889e+07	7.30476e+07	1.49837e+07	1.414e+07	2.58976e+07	2.43518e+07	1.50646e+07	2.15349e+07	1.03712e+07	2.22083e+07	1.61507e+07	4.18559e+07	6.24995e+07	4.80164e+07	1.60445e+07	3.00562e+07	1.56784e+07	3.20411e+07	1.98978e+07	2.93948e+07	3.80108e+07	1.37136e+07	1.41309e+07	1.32406e+07
M70/ 1460	14.632	2.9903e-08	2.1355e-07	3309C - 1103P; own - 1103P; so4 - 1103P; own - so4	5.14265e+06	3.64903e+06	3.88471e+06	2.10369e+06	4.57205e+06	4.76603e+06	5.17825e+06	4.64132e+06	6.74706e+06	4.08023e+06	2.54576e+06	1.11746e+06	2.18244e+06	932484	5.31851e+06	4.44318e+06	5.61239e+06	5.35737e+06	1.36154e+06	2.86034e+06	2.03167e+06	1.70553e+06	3.83608e+06	5.0307e+06	4.94966e+06	5.38805e+06	3.2372e+06	2.98388e+06	5.1271e+06	4.99473e+06	3.679e+06	3.16911e+06	2.4848e+06	895911	3.31999e+06	5.26504e+06	5.6822e+06	5.19068e+06	4.44531e+06	4.24664e+06	4.15561e+06	2.29675e+06	3.34704e+06	3.52128e+06	2.88727e+06
M71/ 1460	26.203	2.7899e-13	1.3092e-11	3309C - 1103P; own - 1103P; so4 - 1103P; own - 3309C; own - so4	1.34255e+06	1.08393e+06	589414	632541	882464	939449	1.35345e+06	1.33401e+06	1.47895e+06	1.34606e+06	420548	419651	364505	321173	1.19694e+06	864661	1.22043e+06	1.30209e+06	196263	571470	656459	598845	1.34506e+06	1.30989e+06	1.44103e+06	1.14645e+06	710776	603953	1.35618e+06	981042	896836	700920	427736	304806	1.17186e+06	1.06827e+06	1.31184e+06	1.30734e+06	911477	1.02436e+06	798496	820468	592604	742237	588208
M117/ 1460	7.081	0.00019313	0.00060137	3309C - 1103P; own - 1103P; own - so4	494025	451406	250649	165073	15097.5	311367	30397.1	554344	14334.5	448273	134497	167908	160551	47496.5	425531	339887	8220.99	480482	54079.2	205864	169787	81234.5	508231	479930	497872	514018	240320	214364	12087.8	458710	227004	264974	36642	76518.9	474995	396894	497110	448929	374841	408661	153822	277695	201044	277794	143501
M209/ 1460	3.3387	0.021483	0.043428	so4 - 1103P; so4 - 3309C	249437	146301	639363	111108	736756	643112	1.33708e+06	630257	528832	145588	136326	55435	96530.6	113371	154830	1.0077e+06	158376	504816	185066	330300	190557	439796	816562	1.06383e+06	597034	731933	1.33423e+06	1.01765e+06	1.1965e+06	528369	472287	222284	235661	15697.5	710781	687766	478494	807314	439343	1.15159e+06	1.19561e+06	999428	1.15682e+06	760769	163022
M93/ 1480	25.681	4.5104e-13	1.9755e-11	1103P - own; 3309C - own; so4 - own	421497	529247	864635	662275	468566	610954	176941	122752	470533	457657	973154	814534	810767	638974	353654	405009	162094	422278	589536	624928	461593	603030	338013	100298	244801	243663	508022	446819	292767	402997	570628	343569	690381	551289	603773	526643	311650	308392	485863	504326	584016	595764	543909	513106	580007
M121/ 1480	31.17	3.4021e-15	2.794e-13	1103P - 3309C; 1103P - own; 1103P - so4; 3309C - own; so4 - own	761349	652357	1.24749e+06	1.08905e+06	1.03818e+06	1.29393e+06	351360	445028	826880	836891	1.42207e+06	1.60647e+06	1.36328e+06	1.60058e+06	698595	840026	551208	569835	1.01767e+06	956569	442801	921125	545430	485073	448651	512029	1.04757e+06	890166	565461	712271	935544	895205	1.26857e+06	1.16238e+06	969259	947980	410549	553201	757353	685956	901672	857155	947187	819534	1.09261e+06
M136/ 1480	29.09	2.0769e-14	1.5162e-12	1103P - 3309C; 1103P - own; 3309C - own; so4 - own	405037	298757	906341	827606	844828	876934	238688	369675	612979	628126	972151	1.03379e+06	977483	797913	287280	519898	266835	236281	533428	701221	514058	683901	222499	213874	226342	313573	475385	567483	543596	451323	825029	576532	924594	779857	672164	642651	336462	323500	591552	421138	696745	669084	594424	575012	595653
M136/ 1510	21.432	2.5947e-11	4.6073e-10	1103P - 3309C; 1103P - own; 1103P - so4; 3309C - own; so4 - own	1.28018e+06	1.16255e+06	2.32312e+06	2.18036e+06	2.20817e+06	2.4817e+06	914468	846797	1.65651e+06	1.38966e+06	2.77905e+06	2.89493e+06	2.78959e+06	2.91942e+06	1.77389e+06	1.7793e+06	1.10404e+06	1.29597e+06	2.11492e+06	1.71529e+06	1.71278e+06	1.5857e+06	8.80054e+06	857661	999824	655673	1.68753e+06	1.67923e+06	1.12301e+06	1.46133e+06	2.20094e+06	1.80327e+06	2.48341e+06	2.38987e+06	1.8813e+06	1.81673e+06	1.12517e+06	1.09045e+06	1.65608e+06	1.52326e+06	1.83189e+06	1.96952e+06	1.6715e+06	1.55493e+06	1.53081e+06
M93/ 1510	11.877	6.4992e-07	3.3889e-06	1103P - own; 3309C - own; so4 - own	1.38028e+06	1.36281e+06	2.44023e+06	2.25755e+06	2.44564e+06	2.46374e+06	860417	986694	1.64337e+06	1.24678e+06	2.8263e+06	2.63665e+06	2.41754e+06	2.7178e+06	1.91593e+06	1.75584e+06	1.12611e+06	1.27813e+06	1.9457e+06	1.44005e+06	1.66757e+06	2.04467e+06	1.47895e+07	948534	957537	969763	1.61739e+06	1.81561e+06	1.34011e+06	1.26148e+06	2.2692e+06	1.98369e+06	2.64256e+06	67937.1	2.19479e+06	1.95616e+06	1.13058e+06	943041	1.14491e+06	1.44975e+06	1.97049e+06	2.11265e+06	1.73408e+06	1.71161e+06	1.91396e+06
M121/ 1510	24.774	1.0496e-12	4.3098e-11	1103P - 3309C; 1103P - own; 3309C - own; so4 - own	2.14069e+06	2.0638e+06	3.38562e+06	3.38767e+06	3.27879e+06	3.49701e+06	1.307e+06	1.45276e+06	2.36883e+06	2.35746e+06	3.97504e+06	4.17403e+06	3.96812e+06	4.35513e+06	2.54691e+06	2.49262e+06	1.6801e+06	1.76267e+06	3.14587e+06	2.78632e+06	2.73816e+06	2.83622e+06	1.01722e+07	1.42079e+06	1.54601e+06	1.54121e+06	2.86037e+06	2.66635e+06	2.16265e+06	2.06957e+06	2.99741e+06	2.76797e+06	3.66816e+06	3.50248e+06	69581	2.61747e+06	1.69902e+06	1.56994e+06	2.28772e+06	2.11741e+06	2.67604e+06	2.95773e+06	2.67859e+06	2.6483e+06	3.00472e+06
M69/ 1510	5.1127	0.0022525	0.0057584	1103P - own; so4 - own	620961	457880	771529	725424	642741	901991	331531	423256	789222	841587	708429	896966	695351	715281	467872	389105	177123	329253	454092	512336	485503	602914	1.12383e+06	331516	319777	355508	360328	410307	375167	482669	621476	510488	601185	546870	635582	599458	482017	510436	1.04154e+06	526242	420117	535675	558087	553820	600341
M74/ 1510	5.6898	0.0010893	0.0029697	1103P - own; 1103P - so4; 3309C - own	1.0822e+06	937762	1.10198e+06	787436	872726	1.15522e+06	887148	1.20863e+06	833224	899954	1.04846e+06	861767	825422	722238	1.38766e+06	988268	1.38786e+06	1.27535e+06	1.45441e+06	1.33213e+06	1.36129e+06	1.11321e+06	2.62385e+06	771017	1.25942e+06	1.20325e+06	1.14204e+06	1.07694e+06	1.05467e+06	1.13973e+06	1.15675e+06	1.34113e+06	1.19688e+06	1.25595e+06	914301	1.1727e+06	1.21891e+06	923931	971162	1.08762e+06	1.46056e+06	1.11058e+06	1.30372e+06	1.23387e+06	1.18971e+06
M207/ 1510	5.6127	0.0012	0.0032312	1103P - own; 1103P - so4; 3309C - own	966043	1.05597e+06	951035	793659	712031	1.0408e+06	804936	1.10936e+06	659494	852065	1.04459e+06	940577	1.00884e+06	747495	1.72458e+06	943845	1.63972e+06	1.14436e+06	1.47911e+06	1.30337e+06	1.46169e+06	959195	4.76534e+06	644529	1.1225e+06	1.09066e+06	1.02939e+06	903414	964489	970210	958802	1.30582e+06	1.32129e+06	1.60077e+06	1.04179e+06	1.01112e+06	1.02108e+06	773168	945800	986327	1.35028e+06	994990	1.08397e+06	936713	1.07374e+06
M194/ 1510	9.4959	1.0403e-05	4.2717e-05	1103P - 3309C; 1103P - own; 1103P - so4; 3309C - own	1.08456e+06	1.12904e+06	1.07742e+06	1.04763e+06	1.11722e+06	1.22289e+06	1.18581e+06	1.52002e+06	1.30015e+06	1.56201e+06	1.45304e+06	1.49365e+06	1.33997e+06	1.57716e+06	1.09813e+06	1.16182e+06	1.01973e+06	1.08294e+06	854705	1.04833e+06	948765	807852	3.80349e+06	886027	1.07653e+06	896271	1.23048e+06	1.08923e+06	1.09292e+06	965635	1.20277e+06	1.29293e+06	1.22174e+06	1.02111e+06	876581	1.02844e+06	918067	984156	1.01346e+06	1.29658e+06	982424	652920	1.03418e+06	1.00074e+06	1.1102e+06
M193/ 1510	10.733	2.4314e-06	1.1093e-05	1103P - 3309C; 1103P - own; 1103P - so4; 3309C - own	5.85391e+06	6.4205e+06	6.04368e+06	5.89729e+06	6.43873e+06	6.82182e+06	6.74038e+06	8.08776e+06	7.23523e+06	8.53236e+06	7.60374e+06	8.48459e+06	7.4222e+06	8.89144e+06	6.27066e+06	6.90671e+06	6.05942e+06	6.1293e+06	5.16846e+06	6.09314e+06	5.49105e+06	4.51287e+06	2.07016e+07	5.10044e+06	6.25472e+06	5.60317e+06	7.17386e+06	6.57356e+06	6.31494e+06	5.99447e+06	6.76025e+06	7.20802e+06	7.16439e+06	6.48978e+06	5.21724e+06	5.83499e+06	5.33999e+06	5.41347e+06	5.47668e+06	7.25773e+06	5.38907e+06	3.87591e+06	5.71082e+06	5.86235e+06	6.27957e+06
M209/ 1510	10.611	2.8024e-06	1.2611e-05	1103P - 3309C; 1103P - own; 1103P - so4; 3309C - own	3.01031e+06	3.24976e+06	2.93619e+06	2.8518e+06	3.18639e+06	3.44277e+06	3.38748e+06	4.22506e+06	3.6566e+06	4.27014e+06	3.91668e+06	4.08107e+06	3.67762e+06	4.36329e+06	3.03901e+06	3.40727e+06	3.01502e+06	3.11509e+06	2.49356e+06	3.04095e+06	2.79059e+06	2.22865e+06	1.05671e+07	2.58499e+06	3.03593e+06	2.79868e+06	3.64198e+06	3.18604e+06	3.10542e+06	2.94037e+06	3.46678e+06	3.63126e+06	3.6707e+06	3.19347e+06	2.34914e+06	2.94683e+06	2.70118e+06	2.65521e+06	2.91317e+06	3.69921e+06	2.80418e+06	1.83422e+06	2.99046e+06	2.91301e+06	3.17403e+06
M77/ 1520	4.9331	0.0028265	0.007115	own - 1103P; own - 3309C; own - so4	1.63066e+06	1.07722e+06	1.15917e+06	460464	1.31229e+06	1.23637e+06	307828	2.98841e+06	3.25696e+06	1.66536e+06	492700	527600	644295	667673	916957	1.04887e+06	1.25916e+06	334631	675298	1.46049e+06	374575	1.50189e+06	1.27405e+06	1.55495e+06	1.41582e+06	2.79338e+06	1.91373e+06	1.1571e+06	1.76748e+06	1.01731e+06	403212	442300	1.65356e+06	1.05697e+06	2.04656e+06	375041	3.14161e+06	4.08127e+06	2.00606e+06	3.72015e+06	965657	2.35651e+06	1.50534e+06	1.17147e+06	453265
M107/ 1520	17.56	1.3103e-09	1.3664e-08	3309C - 1103P; own - 1103P; so4 - 1103P; own - 3309C; own - so4	2.88723e+06	1.98909e+06	1.98404e+06	1.40702e+06	1.16757e+06	2.00578e+06	3.19311e+06	5.27629e+06	4.11312e+06	4.90311e+06	790601	1.17459e+06	728074	895771	486989	1.28435e+06	629617	1.18745e+06	441324	1.09033e+06	425924	887131	102834	2.61507e+06	3.99763e+06	3.51385e+06	907180	488325	1.66373e+06	1.48503e+06	1.36616e+06	1.13488e+06	951674	960442	3.86945e+06	4.08291e+06	4.94483e+06	4.39058e+06	4.28125e+06	4.13514e+06	2.01204e+06	2.37235e+06	382093	1.97306e+06	1.651e+06
M192/ 1520	17.357	1.621e-09	1.6385e-08	3309C - 1103P; own - 1103P; so4 - 1103P; own - 3309C; own - so4	9.43469e+06	6.5475e+06	7.06604e+06	5.15141e+06	4.02717e+06	6.90971e+06	1.0437e+07	1.85378e+07	1.38708e+07	1.72089e+07	2.73689e+06	3.55232e+06	2.27891e+06	2.94704e+06	1.94572e+06	4.41263e+06	1.9088e+06	4.96276e+06	1.67868e+06	3.39737e+06	1.19372e+06	3.29751e+06	162355	8.79217e+06	1.29848e+07	1.22341e+07	2.9026e+06	2.85302e+06	5.26667e+06	5.49983e+06	4.16346e+06	3.82694e+06	2.93643e+06	2.85364e+06	1.34215e+07	1.40622e+07	1.64686e+07	1.62431e+07	1.41176e+07	1.38403e+07	6.78581e+06	8.09643e+06	5.84263e+06	6.37166e+06	5.35182e+06
M91/ 1520	8.5109	3.3805e-05	0.00012203	3309C - 1103P; own - 1103P; so4 - 1103P	3.80437e+06	2.00108e+06	2.55107e+06	1.73118e+06	1.80533e+06	2.31278e+06	3.57991e+06	5.65354e+06	5.49714e+06	5.27145e+06	942151	1.34766e+06	656593	908030	540938	1.8131e+06	630715	2.01934e+06	268798	1.4857e+06	430345	1.28413e+06	7.80368e+06	267469	5.59189e+06	282366	1.29398e+06	514524	2.27704e+06	1.54776e+06	1.72341e+06	1.71273e+06	1.10571e+06	728894	5.26952e+06	5.47931e+06	6.43713e+06	303265	5.70888e+06	5.43299e+06	2.63578e+06	2.94512e+06	2.41601e+06	2.20564e+06	1.80215e+06
M122/ 1520	17.088	2.1482e-09	2.1384e-08	3309C - 1103P; own - 1103P; so4 - 1103P; own - 3309C; own - so4	559535	371429	181885	226459	352277	242132	587613	1.10403e+06	621809	853862	160921	136008	426442	160798	279962	236991	129662	269192	45180.5	193921	53354.7	181428	1.03691e+06	489004	764911	391496	166995	116672	279845	259665	194879	208364	148298	194870	781999	757294	555086	781120	868197	578985	420101	432302	275857	330637	166698
M105/ 1520	4.0342	0.0088508	0.019914	own - 1103P; own - so4	2.65327e+06	1.90646e+06	2.25282e+06	1.74673e+06	1.50956e+06	362159	2.86871e+06	4.40805e+06	3.49165e+06	3.95006e+06	1.37393e+06	1.34322e+06	1.26545e+06	1.43695e+06	1.19067e+06	1.83571e+06	1.14977e+06	1.70119e+06	859447	1.50573e+06	860702	1.36488e+06	1.42237e+06	2.65835e+06	3.98007e+06	3.34844e+06	1.81491e+06	1.3793e+06	2.40435e+06	1.94762e+06	1.95976e+06	1.55433e+06	1.82388e+06	1.71768e+06	2.73914e+06	3.23968e+06	4.40429e+06	4.07887e+06	3.83633e+06	3.68194e+06	2.46024e+06	2.36261e+06	2.29879e+06	2.00604e+06	2.16912e+06
M135/ 1520	15.424	1.265e-08	1.0521e-07	3309C - 1103P; own - 1103P; so4 - 1103P; own - 3309C; own - so4	3.44718e+06	2.30609e+06	2.55172e+06	1.84289e+06	1.39002e+06	2.44511e+06	3.61321e+06	6.53897e+06	4.80715e+06	6.09458e+06	925757	1.3019e+06	818393	913074	157982	1.14505e+06	412548	1.67631e+06	358764	1.25173e+06	308588	1.15274e+06	1.10995e+06	2.95598e+06	4.55975e+06	4.27151e+06	964138	845695	1.91719e+06	1.84509e+06	1.21426e+06	1.2342e+06	763015	1.30041e+06	5.00935e+06	4.93028e+06	5.73974e+06	5.49521e+06	5.04271e+06	4.81557e+06	2.32387e+06	2.53078e+06	2.10309e+06	2.23594e+06	1.82795e+06
M51/ 1520	3.4063	0.01971	0.040492	own - 1103P; own - 3309C	42591.6	39600.9	391868	256573	52537.6	380108	592245	785118	719223	866885	322762	212391	302209	298724	251591	306733	63061.9	260389	51606.1	329028	129887	335254	324951	509214	894669	598353	414531	288579	495854	371933	449060	282728	446405	290458	505309	41464.3	904471	877791	813525	769384	83776.8	64468.9	309057	361069	342431
M67/ 1520	13.603	9.2944e-08	5.7608e-07	3309C - 1103P; own - 1103P; so4 - 1103P; own - 3309C; own - so4	1.04234e+06	651363	797036	638240	233882	794498	981240	2.04779e+06	1.53585e+06	1.86856e+06	80622.5	422954	281711	343399	77659.9	516782	163288	105057	221466	211136	154226	109870	2.10034e+06	859613	1.35818e+06	1.37761e+06	80078.2	296215	656209	516137	515099	425355	277851	259610	1.6146e+06	1.51266e+06	1.89127e+06	1.80243e+06	1.6074e+06	1.55775e+06	653020	1.03032e+06	707790	238530	537948
M149/ 1520	9.999	5.7387e-06	2.4325e-05	3309C - 1103P; own - 1103P; so4 - 1103P	2.83423e+06	1.89391e+06	2.03091e+06	1.58052e+06	1.06524e+06	2.02485e+06	3.04993e+06	5.32004e+06	4.08305e+06	5.06277e+06	816522	924619	551937	826607	387305	1.31594e+06	305349	1.36481e+06	279964	622561	834261	867283	19992.2	2.55056e+06	3.76027e+06	3.51676e+06	790777	728806	1.53876e+06	1.59272e+06	1.09786e+06	978475	427409	11916.1	4.47082e+06	4.04123e+06	4.73787e+06	4.67911e+06	4.11199e+06	3.99286e+06	1.96399e+06	2.12434e+06	1.75967e+06	1.6991e+06	1.35844e+06
M108/ 1520	18.097	7.503e-10	8.6214e-09	3309C - 1103P; own - 1103P; so4 - 1103P; own - 3309C; own - so4	1.39864e+06	789860	1.10387e+06	643916	595039	950555	1.48657e+06	2.50786e+06	1.60211e+06	2.34392e+06	439639	291568	327157	393662	141902	685093	208896	80327.4	161049	332885	134384	507031	2.75103e+06	1.30703e+06	1.8152e+06	1.69062e+06	372371	383250	853432	113742	633932	481843	325353	163995	1.92579e+06	1.39118e+06	2.54275e+06	2.39679e+06	2.04868e+06	2.12823e+06	832733	1.29027e+06	782684	705652	644114
M150/ 1520	20.293	8.0335e-11	1.0996e-09	3309C - 1103P; own - 1103P; so4 - 1103P; own - 3309C; own - so4	1.11866e+06	650041	820865	613454	460235	801011	1.27239e+06	2.18826e+06	1.72004e+06	1.91821e+06	177725	363116	216940	241463	176614	483214	134755	514685	61627.8	364057	84452.9	278044	2.25018e+06	1.03196e+06	1.3203e+06	1.11871e+06	252314	188671	586995	48596.2	487566	412681	151371	356130	1.49563e+06	1.46299e+06	2.05891e+06	1.91341e+06	1.73343e+06	1.56706e+06	793133	952882	560808	690990	500856
M193/ 1520	14.248	4.5548e-08	3.0536e-07	3309C - 1103P; own - 1103P; so4 - 1103P	1.56438e+06	1.06834e+06	1.25291e+06	833650	756985	818848	1.68214e+06	2.77907e+06	2.21546e+06	2.33387e+06	391294	650555	389180	480166	255046	640384	395464	875606	121314	275213	215387	576860	2.6022e+06	1.15211e+06	1.83347e+06	2.01174e+06	309308	518484	869627	800082	801794	660495	308952	0	1.28903e+06	2.20162e+06	2.61029e+06	1.86474e+06	2.44806e+06	1.69706e+06	1.10763e+06	1.35999e+06	1.02425e+06	845800	937168
M163/ 1520	14.921	2.1803e-08	1.6278e-07	3309C - 1103P; own - 1103P; so4 - 1103P; own - 3309C; own - so4	1.08129e+06	727444	779304	557242	163800	680236	1.10828e+06	2.05709e+06	1.59724e+06	1.89137e+06	200467	317353	236502	260295	132338	407891	122075	321622	80336.2	281418	231138	114967	258989	885650	1.39898e+06	1.31304e+06	344760	272719	509666	518760	331223	412363	202429	151538	1.44787e+06	1.50673e+06	1.81162e+06	1.82037e+06	1.5249e+06	1.55883e+06	749197	884387	625418	99902.4	581736
M177/ 1520	26.434	2.2572e-13	1.1408e-11	3309C - 1103P; own - 1103P; so4 - 1103P; own - 3309C; own - so4	5.82694e+06	3.89776e+06	4.35619e+06	3.25134e+06	2.52004e+06	4.31133e+06	6.38413e+06	1.14115e+07	8.40455e+06	1.0564e+07	1.74803e+06	2.16649e+06	1.45284e+06	1.75494e+06	1.07894e+06	2.71553e+06	734795	3.07217e+06	705943	2.02182e+06	757066	2.0009e+06	1.08328e+07	5.36651e+06	7.95938e+06	7.46045e+06	1.77147e+06	1.76877e+06	3.22192e+06	3.46038e+06	2.55019e+06	2.37654e+06	1.71295e+06	1.79643e+06	8.1732e+06	8.49984e+06	1.01082e+07	9.7287e+06	8.65559e+06	8.43863e+06	4.1107e+06	4.94043e+06	3.79269e+06	3.98813e+06	3.29584e+06
M109/ 1520	22.524	8.943e-12	2.0262e-10	3309C - 1103P; own - 1103P; so4 - 1103P; own - 3309C; own - so4	1.49016e+06	814092	779540	800171	489424	967178	1.57745e+06	2.74228e+06	1.91804e+06	2.55602e+06	414491	470393	405209	455706	203099	489337	172229	734147	156507	559552	152103	529185	2.70599e+06	579767	1.48842e+06	1.95313e+06	440848	474928	805001	787512	405683	431779	277311	39708.7	2.02357e+06	1.72664e+06	2.43552e+06	2.21596e+06	2.12667e+06	1.80546e+06	1.02851e+06	1.11494e+06	775763	928698	759865
M65/ 1520	11.214	1.3912e-06	6.6757e-06	3309C - 1103P; own - 1103P; so4 - 1103P; own - 3309C; own - so4	1.14181e+06	681713	86657.6	639027	418579	710977	1.26053e+06	2.18709e+06	1.68811e+06	2.01571e+06	262948	361007	265824	312026	177150	336371	130201	472196	72327.1	220496	122875	331976	18688.6	1.00353e+06	1.38914e+06	1.39606e+06	254155	218158	70093.5	494343	312224	356436	215218	331560	1.32267e+06	1.57987e+06	1.69873e+06	1.66061e+06	1.74426e+06	1.51693e+06	534125	483607	672169	585411	561468
M93/ 1520	10.412	3.5345e-06	1.5585e-05	3309C - 1103P; own - 1103P; so4 - 1103P; own - 3309C	8.10773e+06	5.20047e+06	5.83942e+06	4.24403e+06	3.12649e+06	5.81018e+06	8.48386e+06	1.50613e+07	1.15417e+07	1.16941e+07	2.09382e+06	3.08838e+06	2.10789e+06	2.4853e+06	1.38232e+06	3.44475e+06	1.13521e+06	4.15353e+06	1.23332e+06	3.11547e+06	1.13373e+06	2.80861e+06	102641	6.70121e+06	1.05866e+07	9.98943e+06	2.52668e+06	2.21334e+06	4.56527e+06	4.30003e+06	3.46159e+06	2.85706e+06	2.64556e+06	89964.4	1.10673e+07	1.09329e+07	1.36574e+07	1.29694e+07	1.19731e+07	1.09182e+07	5.8932e+06	6.71166e+06	4.65653e+06	4.94556e+06	4.24008e+06
M111/ 1520	26.608	1.9245e-13	1.0537e-11	3309C - 1103P; own - 1103P; so4 - 1103P; own - 3309C; own - so4	708346	416764	522263	260342	255003	386689	622513	920766	872407	931787	203726	124427	88361.2	108997	132556	195624	68298.8	345154	44631.4	152777	62023.1	138981	1.25537e+06	381651	754767	594177	136680	190124	130361	364855	52288	170813	100492	7483.64	840815	918414	894827	677762	1.08668e+06	608929	324536	544600	196565	350527	149133
M133/ 1520	20.884	4.4555e-11	7.1396e-10	3309C - 1103P; own - 1103P; so4 - 1103P; own - 3309C; own - so4	925085	576994	629118	452729	320759	580734	931639	1.72675e+06	1.31412e+06	1.5676e+06	215218	281776	190059	262080	141190	268159	138380	373463	57685	215767	76004.6	266849	237261	795478	1.15652e+06	1.1382e+06	233223	244116	445604	477365	486077	375411	162753	108914	1.5166e+06	1.22909e+06	1.48869e+06	1.36614e+06	1.33254e+06	1.36755e+06	562648	761418	554972	543533	510868
M134/ 1520	18.38	5.5999e-10	6.5699e-09	3309C - 1103P; own - 1103P; so4 - 1103P; own - 3309C; own - so4	713986	466970	556666	356291	289239	493383	748070	1.36726e+06	989150	1.26478e+06	196992	254905	176741	194103	86484.4	309498	95641.9	301088	59679.6	249454	57414	212312	1.28074e+06	553403	931373	893009	186655	199703	348840	375524	244960	264341	117643	9666.07	951750	1.04775e+06	1.09103e+06	1.07026e+06	1.02625e+06	1.01215e+06	507900	509007	433619	471572	336925
M136/ 1520	19.898	1.1944e-10	1.5694e-09	3309C - 1103P; own - 1103P; so4 - 1103P; own - 3309C; own - so4	4.87335e+06	3.42354e+06	3.68206e+06	2.70849e+06	2.11731e+06	3.53431e+06	5.29267e+06	9.13292e+06	7.06651e+06	8.52065e+06	1.47752e+06	1.76762e+06	1.01953e+06	1.59602e+06	1.02875e+06	2.22377e+06	630240	2.56087e+06	584560	1.86416e+06	603004	1.71594e+06	144412	4.35174e+06	6.36983e+06	5.96942e+06	1.5943e+06	1.5172e+06	2.74084e+06	2.74129e+06	2.12868e+06	1.98639e+06	1.38417e+06	51077.7	6.76722e+06	6.99862e+06	8.09099e+06	7.93829e+06	7.06204e+06	6.86143e+06	3.53011e+06	4.08835e+06	3.13732e+06	3.30955e+06	2.59257e+06
M132/ 1520	19.202	2.4144e-10	2.9929e-09	3309C - 1103P; own - 1103P; so4 - 1103P; own - 3309C; own - so4	340400	149436	203464	131955	111744	176495	241432	589069	434269	531300	61630.1	71265.1	47003.5	70294.1	36180.9	97570.4	32538.6	73464.2	25629.9	62256.7	23103.4	72123.8	626542	241119	367557	275861	45868.4	60837.2	72881.3	66104.7	117606	106192	45288	18137.9	450449	426045	500727	479841	445535	421392	162275	244099	140670	204147	54154.6
M120/ 1520	20.061	1.0138e-10	1.3594e-09	3309C - 1103P; own - 1103P; so4 - 1103P; own - 3309C; own - so4	486312	387058	398102	311481	210311	385906	528874	1.06286e+06	798302	1.0203e+06	136863	218393	108065	153335	60047.9	184817	86812.6	204138	14891.8	95870.9	75258.9	174945	939192	489605	748660	653272	174859	128817	316321	255162	216693	192550	73933.8	6019.9	771239	775235	920751	893419	821854	776690	386260	474001	336921	362124	303015
M117/ 1520	18.867	3.3976e-10	4.0586e-09	3309C - 1103P; own - 1103P; so4 - 1103P; own - 3309C; own - so4	1.00634e+06	505928	683800	413766	418832	611923	997354	1.79988e+06	1.51043e+06	1.56647e+06	217472	281222	192915	267274	129437	437475	266505	478972	129258	290527	359688	337455	1.77157e+06	851435	1.17102e+06	1.2148e+06	305404	254708	554941	430516	317552	385330	208848	70223.9	1.40508e+06	1.36143e+06	1.52295e+06	1.53517e+06	1.33322e+06	1.32198e+06	763583	35515.2	371558	611257	481483
M119/ 1520	27.627	7.6483e-14	5.0249e-12	3309C - 1103P; own - 1103P; so4 - 1103P; own - 3309C; own - so4	2.50326e+06	1.69574e+06	1.71396e+06	1.24993e+06	1.00221e+06	1.74972e+06	2.64973e+06	4.64215e+06	3.50831e+06	4.29469e+06	774019	862351	600649	731409	451316	1.0492e+06	455576	1.14137e+06	372927	869252	271470	775118	4.4444e+06	2.02948e+06	3.24946e+06	3.01721e+06	674681	646609	1.33864e+06	1.38959e+06	1.00762e+06	952153	796996	757253	3.32752e+06	3.52778e+06	4.07849e+06	3.90667e+06	3.61891e+06	3.46618e+06	1.69028e+06	2.01175e+06	1.58954e+06	1.62902e+06	1.36009e+06
M95/ 1520	14.982	2.0422e-08	1.5517e-07	3309C - 1103P; own - 1103P; so4 - 1103P; own - 3309C; own - so4	1.28009e+06	838895	967711	772045	620542	1.03431e+06	1.33937e+06	2.34691e+06	2.05141e+06	1.99128e+06	390419	484505	198271	314879	220054	472244	57087.3	694575	181043	430563	183858	418005	2.373e+06	1.23238e+06	1.52299e+06	1.6199e+06	350430	255415	382217	101906	458328	70364.3	303520	45836.6	1.83816e+06	1.64714e+06	2.23544e+06	2.01108e+06	1.91729e+06	1.72649e+06	976220	1.10423e+06	786038	636421	514671
M66/ 1520	20.675	5.4848e-11	8.5799e-10	3309C - 1103P; own - 1103P; so4 - 1103P; own - 3309C; own - so4	358621	217714	287638	220401	122265	265658	458918	896277	569787	808836	136243	144698	76288.9	122781	81636	186047	21998.3	159663	21229.8	103350	24736.2	158910	787404	372970	606213	589639	27894.2	89451.9	140884	141264	163458	149926	121968	6429.13	539762	618976	745955	795154	734940	665576	337337	26478.3	225069	232732	259688
M41/ 1520	12.705	2.5383e-07	1.4628e-06	3309C - 1103P; own - 1103P; own - 3309C; own - so4	823201	269630	492338	394529	432858	361837	132010	1.61647e+06	953065	1.20295e+06	286771	428985	186316	280863	225583	287216	111179	330845	353206	131424	214699	274565	1.49216e+06	499606	1.24164e+06	863748	227321	173561	211580	448227	234514	252503	198039	164803	896764	997049	889571	1.41865e+06	892692	1.16923e+06	482693	734367	416709	592562	354005
M131/ 1520	7.6339	9.8014e-05	0.00032037	3309C - 1103P; own - 1103P; so4 - 1103P; own - 3309C; own - so4	196491	227504	404389	234102	130911	347048	529991	873492	288533	854089	138653	282746	112199	245415	388785	284217	71923.6	207279	56625.6	154994	70409.8	393929	66998.7	170769	361913	245630	363207	302415	77912.3	196294	309548	120864	120915	98022.9	304560	256888	300159	636662	465107	235710	161914	212236	142112	427546	156252
M53/ 1520	22.336	1.0725e-11	2.3487e-10	3309C - 1103P; own - 1103P; so4 - 1103P; own - 3309C; own - so4	581943	436426	489863	299724	100840	369633	709502	1.09209e+06	862086	290916	193046	190344	112080	144514	127845	312452	55301.9	329025	170152	81112.2	196657	225980	1.14068e+06	583411	841628	753996	158982	95424.6	354965	285290	272305	88277.8	124958	123165	794232	873586	1.03382e+06	960468	899178	784324	272431	43891.3	350232	389799	351121
M70/ 1520	7.5085	0.00011425	0.00036976	own - 1103P; so4 - 1103P; own - 3309C	1.0751e+06	669761	815438	554295	401618	840853	1.17957e+06	1.89172e+06	1.51372e+06	1.84692e+06	550235	684366	483664	328837	160583	546726	253978	576722	486510	482214	532424	343254	432946	272398	1.41024e+06	1.31407e+06	573746	322262	395375	662440	278075	460288	334959	406689	1.3792e+06	343786	1.84889e+06	1.72212e+06	1.58316e+06	1.59913e+06	472668	929590	56330.6	405197	599363
M61/ 1540	5.6335	0.0011692	0.0031611	1103P - own; so4 - own	181229	282550	163466	357918	215481	271878	224816	191709	328213	363276	346231	504984	396212	424170	440609	521781	189828	187135	382078	124374	461523	690932	103230	175285	305695	217894	512485	318890	422775	213474	169529	155213	168402	249058	297051	235388	140278	174420	57600.3	431663	256442	778593	134317	203065	380644
M193/ 1540	4.4938	0.0049329	0.011959	1103P - 3309C; 1103P - own; 1103P - so4	683797	817204	763849	648849	881498	816791	872987	1.04827e+06	1.15435e+06	1.01556e+06	930499	1.01192e+06	964670	1.11034e+06	1.23066e+06	935422	1.15297e+06	851983	925628	936829	1.08078e+06	322063	9.20085e+06	704540	1.14831e+06	854655	1.26407e+06	815768	1.02792e+06	762867	1.03494e+06	860582	1.24853e+06	1.36188e+06	817448	839285	741827	796156	966193	990345	926375	671775	867060	599463	938369
M141/ 1540	6.0971	0.0006543	0.001869	1103P - own; 3309C - own; so4 - own	193986	373836	229161	465667	421850	369267	293348	322871	436861	352374	475674	583018	469742	498352	339286	688425	311912	671503	422152	318075	510959	836444	4856.79	205768	326775	6644.81	609891	348203	7240.86	409549	273110	484719	352950	338980	116066	278813	64269.4	144469	72714.7	365568	278787	914023	305207	335076	433409
M101/ 1540	3.6154	0.015095	0.031888	1103P - own; so4 - own	683771	341019	458077	1.00782e+06	551921	786264	84054.9	599731	129550	103797	916658	1.0312e+06	434567	888160	821975	1.39786e+06	662956	1.21412e+06	187117	209838	471187	1.90775e+06	881897	70596.3	886280	466544	1.16994e+06	697141	974249	736587	414878	690134	808513	731549	928565	516089	566878	51407.3	59735.6	786349	612893	24189.8	717217	319994	374716
M60/ 1540	7.9372	6.7716e-05	0.00023052	1103P - own; 1103P - so4; 3309C - own; so4 - own	326876	347383	106057	381734	298021	413526	184436	388737	140364	477515	482788	627278	469308	468260	487513	601001	80341.9	603447	68178.4	358490	564161	785748	64807	253772	190958	228227	141379	393220	128145	271495	93558.7	491443	234497	236905	270527	282112	99143.2	195320	135450	542724	257899	38626.3	265123	344527	420997
M43/ 1540	4.021	0.0090006	0.020182	1103P - own; 1103P - so4; 3309C - own	1.19729e+06	1.0461e+06	1.87405e+06	1.28368e+06	541852	2.13845e+06	1.65674e+06	867705	1.00451e+06	1.1334e+06	714003	1.39791e+06	768639	1.50746e+06	2.46509e+06	1.90199e+06	3.02771e+06	1.87954e+06	1.25468e+06	2.3239e+06	1.14334e+06	2.21887e+06	1.87411e+06	570297	673709	1.36743e+06	983751	1.09149e+06	713546	1.1427e+06	2.01012e+06	1.24018e+06	2.43559e+06	3.58986e+06	4.74508e+06	1.29771e+06	1.62367e+06	1.34273e+06	1.97044e+06	1.68884e+06	3.06748e+06	2.73783e+06	1.44221e+06	757507	1.1903e+06
M57/ 1540	3.7989	0.011945	0.025901	1103P - own; 1103P - so4	1.7161e+06	1.71953e+06	2.01115e+06	1.43002e+06	1.99357e+06	2.41899e+06	1.76089e+06	1.9016e+06	1.73631e+06	2.27163e+06	1.31136e+06	2.25585e+06	1.35285e+06	1.78596e+06	2.65848e+06	2.31777e+06	2.80475e+06	2.04897e+06	1.84279e+06	2.15803e+06	1.83758e+06	2.29679e+06	458261	1.47187e+06	1.15828e+06	2.22371e+06	1.10906e+06	1.85297e+06	336907	2.08374e+06	2.49591e+06	1.63098e+06	3.40798e+06	3.45393e+06	4.67903e+06	1.63816e+06	2.61206e+06	1.71887e+06	4.09874e+06	1.97265e+06	3.49152e+06	3.28627e+06	1.56936e+06	1.6301e+06	1.43284e+06
M71/ 1550	22.006	1.4782e-11	2.9186e-10	1103P - 3309C; 1103P - own; 1103P - so4; 3309C - own; so4 - own	556813	804351	1.05665e+06	1.29991e+06	289150	1.24287e+06	454257	572578	1.00734e+06	805484	1.47316e+06	1.82302e+06	337787	1.54359e+06	2.0068e+06	1.22545e+06	970800	816077	2.10065e+06	1.06767e+06	2.36426e+06	484568	940755	404247	221376	563112	757005	732000	764080	428374	1.03397e+06	1.15529e+06	1.05951e+06	1.52142e+06	1.2621e+06	632407	502284	348287	182347	615231	972935	1.08816e+06	784603	302014	979616
M55/ 1550	6.6281	0.00033801	0.001014	1103P - 3309C; 1103P - so4; own - 3309C; own - so4	761248	429024	526480	578511	655482	701771	476108	621049	1.93046e+06	1.89058e+06	703097	710909	696315	695236	1.02782e+06	619793	571523	492057	859887	636365	1.03315e+06	844129	1.03677e+06	1.00488e+06	1.13857e+06	705115	490798	614798	459855	490033	633165	593786	617257	745001	1.47637e+06	957029	432058	1.02176e+06	545383	455589	517767	731404	438151	448368	438903
M93/ 1550	23.694	2.91e-12	9.1041e-11	1103P - 3309C; 1103P - own; 1103P - so4; 3309C - own; so4 - own	433715	643867	608515	1.22034e+06	1.12358e+06	800373	393762	351379	959515	3.26591e+06	1.2155e+06	1.48928e+06	1.0763e+06	332854	2.09664e+06	1.14865e+06	1.1823e+06	695697	2.19383e+06	1.18766e+06	1.94879e+06	1.56849e+06	720342	382657	292771	492024	712012	910685	718660	804370	1.2147e+06	1.12062e+06	1.54397e+06	1.59457e+06	1.06374e+06	641301	564501	475183	998830	671869	1.03968e+06	945973	776196	116770	929728
M56/ 1550	4.9741	0.0026836	0.0067813	own - 1103P; own - 3309C; own - so4	922126	1.33628e+06	925712	925865	772415	913135	1.42165e+06	591730	1.6324e+06	1.94989e+06	827916	934451	730821	621506	1.4289e+06	1.20359e+06	1.07353e+06	1.0095e+06	1.14013e+06	792343	175018	1.06987e+06	2.13103e+06	1.34584e+06	1.34282e+06	1.23645e+06	712651	78583.7	946057	1.04392e+06	874403	781794	697899	726402	1.32321e+06	1.19465e+06	1.224e+06	1.14979e+06	828534	899236	811593	846873	806265	848184	542950
M83/ 1550	4.414	0.0054592	0.012995	own - 1103P; own - 3309C; own - so4	365491	554100	348548	589507	413535	493567	706092	1.14663e+06	1.27803e+06	841157	518431	498844	391349	428425	914527	806818	696770	122726	626634	379254	776932	629559	812230	574267	735530	651611	286678	399223	490736	436734	528690	400313	407493	383570	681594	612813	655126	661579	502460	332721	409227	363716	424679	479170	317435
M84/ 1550	9.7906	7.3383e-06	3.0514e-05	3309C - 1103P; own - 1103P; so4 - 1103P; own - 3309C; own - so4	530485	578779	582827	613250	525266	614235	1.09006e+06	1.21991e+06	861512	998897	490028	523981	404419	478951	849686	796769	668371	735798	641333	426733	633779	683960	1.36575e+06	920631	879365	796539	399771	372329	595137	640610	531191	462575	440692	470788	833013	767323	543192	807498	585684	560045	489081	569530	482690	555021	447447
M70/ 1550	8.6054	3.0168e-05	0.00011011	own - 1103P; own - 3309C; own - so4	675953	683348	763744	741666	650091	770123	1.32182e+06	1.45411e+06	1.29843e+06	1.41615e+06	612293	763850	553792	583247	1.07753e+06	1.03299e+06	852653	832381	768203	615976	893015	856912	1.63668e+06	1.1226e+06	1.05091e+06	975487	515560	586763	739176	819203	717816	565416	530264	538257	1.02749e+06	922386	990419	829660	661194	804529	657542	654562	626524	693206	531565
M57/ 1570	7.0672	0.00019643	0.00060876	1103P - 3309C; 1103P - own; 1103P - so4; 3309C - own	385134	386980	609578	364722	665079	710754	476693	368923	691614	707423	447914	625282	516839	523113	936660	732710	875561	583950	502158	558611	454134	726980	389294	386555	281619	464444	339725	523312	238793	471279	776977	333616	1.0499e+06	893992	1.34351e+06	424789	661595	367317	1.18999e+06	561577	1.06095e+06	1.22599e+06	318203	443334	354102
M45/ 1570	6.2787	0.00052173	0.0015167	1103P - own; 1103P - so4; 3309C - own	3.73781e+06	3.85391e+06	5.83343e+06	3.08988e+06	6.13995e+06	6.64378e+06	4.27676e+06	4.20216e+06	5.11835e+06	4.90398e+06	3.74689e+06	6.4789e+06	4.63054e+06	3.75989e+06	8.37191e+06	6.38062e+06	8.07402e+06	5.7022e+06	5.13966e+06	5.66267e+06	4.28429e+06	6.93666e+06	5.42115e+06	3.62493e+06	3.06008e+06	4.64431e+06	3.16909e+06	4.54938e+06	2.02317e+06	4.53565e+06	7.14253e+06	3.17827e+06	9.54496e+06	8.02753e+06	1.1687e+07	4.30225e+06	5.19794e+06	3.53752e+06	1.0817e+07	4.94172e+06	9.59144e+06	1.14164e+07	4.34565e+06	3.99359e+06	3.75829e+06
M91/ 1600	3.8424	0.011302	0.024917	so4 - 1103P; so4 - 3309C	323338	248595	604287	340372	667959	396093	709063	663132	153466	561031	282810	212495	290210	220890	100026	587034	20524	232689	18899.8	431917	41121.7	473429	464395	832594	462500	843570	1.00763e+06	885366	1.12557e+06	543952	369296	512450	91652.7	114692	634213	1.12821e+06	559633	926098	620076	833443	539507	667497	540507	732290	470731
M57/ 1600	5.6678	0.0011198	0.0030401	1103P - own; 1103P - so4; 3309C - own; 3309C - so4	502779	380723	298418	289083	313498	350288	393423	298872	715972	730452	407482	300941	289095	260320	475231	536494	380235	237295	322447	217813	437847	346834	790474	186212	201006	136850	183332	203787	54301.9	180502	163329	122970	1.22388e+06	1.39703e+06	69111.9	225067	42475.7	152419	205421	262646	175765	298646	223697	135774	196005
M88/ 1640	8.4807	3.5059e-05	0.00012587	1103P - 3309C; 1103P - own; 1103P - so4; 3309C - own; so4 - own	2.20073e+07	2.34468e+07	2.45315e+07	2.30143e+07	2.86112e+07	2.26378e+07	2.56873e+07	1.80276e+07	2.22183e+07	2.38993e+07	2.23434e+07	2.64161e+07	2.93167e+07	3.00014e+07	2.43309e+07	2.49974e+07	2.54499e+07	2.15155e+07	2.77282e+07	2.63837e+07	2.3021e+07	2.74422e+07	3.57925e+07	2.56549e+07	2.73733e+07	2.76717e+07	2.60233e+07	2.28122e+07	2.35216e+07	2.58677e+07	2.69881e+07	2.71712e+07	2.84362e+07	3.07126e+07	3.17492e+07	2.94048e+07	2.4045e+07	2.9675e+07	2.94346e+07	2.34508e+07	2.81397e+07	3.05856e+07	2.2648e+07	2.77509e+07	2.61404e+07
M115/ 1640	3.8749	0.010843	0.024067	own - 1103P; so4 - 1103P	5.8174e+06	6.8399e+06	8.53598e+06	6.08437e+06	9.60525e+06	6.50382e+06	8.79569e+06	8.58573e+06	9.89788e+06	5.91012e+06	5.40732e+06	4.74267e+06	4.42529e+06	4.06154e+06	5.36095e+06	6.31902e+06	7.50073e+06	6.72941e+06	5.98963e+06	4.78621e+06	8.51647e+06	8.93553e+06	1.17377e+07	7.34595e+06	6.74118e+06	5.80668e+06	5.52428e+06	6.50934e+06	5.7597e+06	5.40755e+06	6.74593e+06	5.36637e+06	2.28091e+06	2.63112e+06	8.49094e+06	5.41588e+06	6.05399e+06	6.41094e+06	8.18242e+06	9.40991e+06	4.83779e+06	8.24543e+06	5.2877e+06	6.82387e+06	7.01963e+06
M101/ 1640	3.3684	0.020685	0.042074	3309C - 1103P; own - 1103P; so4 - 1103P	4.44893e+07	4.77166e+07	3.70665e+07	4.13082e+07	4.13383e+07	4.01893e+07	4.41023e+07	4.75251e+07	4.38505e+07	4.8055e+07	3.4709e+07	3.91861e+07	2.52893e+07	2.5443e+07	3.68492e+07	2.55205e+07	3.72221e+07	3.51747e+07	3.65311e+07	2.98146e+07	4.37037e+07	3.95438e+07	5.42984e+07	4.5057e+07	4.25359e+07	3.80557e+07	3.34186e+07	3.36903e+07	3.91272e+07	4.48772e+07	8.68068e+06	3.30015e+07	7.49679e+06	55985.6	3.71566e+07	3.7542e+07	3.42092e+07	3.41588e+07	3.32887e+07	3.45115e+07	2.38889e+07	2.9798e+07	3.02339e+07	4.18998e+07	2.80491e+07
M88/ 1640	4.1308	0.0078263	0.017854	own - 1103P; so4 - 1103P	4.83399e+07	4.82536e+07	3.7477e+07	4.24398e+07	3.78526e+07	4.25868e+07	4.92148e+07	5.36813e+07	4.85326e+07	4.82716e+07	3.68151e+07	3.72804e+07	2.13334e+07	2.05404e+07	3.73673e+07	2.59289e+07	3.73106e+07	3.66215e+07	3.23597e+07	2.58986e+07	4.31748e+07	3.74695e+07	4.89331e+07	4.32669e+07	3.78149e+07	3.75945e+07	3.18641e+07	3.68996e+07	4.26838e+07	4.32791e+07	3.19789e+07	3.18262e+07	0	0	3.2046e+07	3.21507e+07	3.70961e+07	3.2154e+07	3.20302e+07	3.7128e+07	2.0598e+07	2.64366e+07	3.1671e+07	3.76455e+07	2.61349e+07
M77/ 1650	5.9149	0.0008216	0.002297	1103P - own; 1103P - so4; 3309C - own; 3309C - so4	124323	3.30478e+06	286366	973341	194480	229581	237436	198731	367817	301104	247633	2.87634e+06	3.70679e+06	3.4246e+06	5.92968e+06	229769	3.91364e+06	179539	3.70437e+06	241612	4.06899e+06	223949	376915	193467	133962	163023	146457	133877	225390	84777.9	172144	1.06519e+06	3.37976e+06	3.08135e+06	1.73648e+06	43440.4	191350	118999	462856	183614	250523	255364	175322	72790.6	142252
M70/ 1660	5.1188	0.0022353	0.0057367	own - 1103P; so4 - 1103P	8.63238e+06	1.02571e+07	6.14844e+06	7.47125e+06	7.90832e+06	9.42822e+06	1.3925e+07	1.40876e+07	1.16425e+07	1.24856e+07	5.26133e+06	6.61902e+06	3.80256e+06	3.91664e+06	5.02542e+06	5.9252e+06	5.44943e+06	7.28623e+06	3.86921e+06	4.31964e+06	4.50381e+06	6.34492e+06	6.97209e+06	8.64788e+06	6.6298e+06	8.29656e+06	4.71781e+06	6.42654e+06	8.02683e+06	1.26434e+07	4.81015e+06	6.24807e+06	2.13472e+06	1.57178e+06	5.2258e+06	6.82406e+06	6.09881e+06	6.97094e+06	5.18396e+06	7.90521e+06	4.8595e+06	8.26879e+06	4.20967e+06	7.43686e+06	3.24825e+06
M83/ 1660	4.7521	0.0035545	0.0088796	1103P - own; so4 - own	495262	544582	562485	713390	599302	688676	245192	432337	637848	877752	567239	832387	487875	619825	718347	497187	414960	485773	637032	386774	598367	592831	137158	454130	444917	390002	233307	424395	399762	652625	348306	446127	275627	62171.4	290974	307114	142600	437980	294614	450616	241247	280300	192694	299647	255486
M56/ 1660	13.213	1.4349e-07	8.4171e-07	1103P - 3309C; 1103P - own; 1103P - so4; 3309C - own; so4 - own	615408	815295	1.0083e+06	1.11009e+06	736874	1.01983e+06	689229	833660	1.21385e+06	1.20415e+06	1.16764e+06	1.27858e+06	714977	977595	1.25571e+06	1.25502e+06	765930	733501	970328	873762	1.1296e+06	1.11283e+06	743147	627767	625098	639942	665368	678562	627206	797935	660230	683362	1.10559e+06	1.23681e+06	637986	746503	516739	535473	653276	747740	524228	689558	489670	707257	595577
M69/ 1660	9.1656	1.5415e-05	5.9927e-05	1103P - 3309C; 1103P - own; 1103P - so4; 3309C - own	701016	785252	851318	839015	639106	942108	718889	844627	896914	1.30462e+06	1.12032e+06	1.30581e+06	619746	936137	1.24246e+06	1.08297e+06	971381	658948	978954	1.21311e+06	1.00186e+06	967032	667009	575260	455933	476214	646438	614359	489293	832154	525292	682431	1.00847e+06	1.26184e+06	784418	751911	488417	523428	629646	529368	475019	512169	374382	683660	610671
M207/ 1680	4.2039	0.007131	0.016381	1103P - own; 1103P - so4	247126	513328	292922	233218	244765	294473	207740	398953	242754	277245	421206	266123	493121	253105	617307	173559	1.10295e+06	290701	582142	528046	585973	471585	1.91928e+06	275684	118678	226917	149289	292975	247054	318617	264405	822474	550291	768026	357536	261632	248884	161076	388816	325138	894677	271343	393878	205170	557383
M55/ 1690	7.6945	9.1023e-05	0.00030051	3309C - 1103P; own - 1103P; so4 - 1103P	4.66849e+06	4.69715e+06	5.30532e+06	5.6546e+06	6.0329e+06	5.79539e+06	3.53557e+06	3.4802e+06	5.58524e+06	5.48917e+06	2.48294e+06	2.77826e+06	2.67505e+06	2.48614e+06	6.17527e+06	4.43968e+06	5.44476e+06	4.75336e+06	3.81242e+06	2.69593e+06	5.18992e+06	4.2369e+06	6.60819e+06	4.88588e+06	5.07905e+06	4.73582e+06	3.90186e+06	3.77458e+06	5.13405e+06	5.18473e+06	4.88347e+06	4.42468e+06	1.62912e+06	1.60617e+06	5.91959e+06	5.47906e+06	5.58819e+06	5.3489e+06	4.89557e+06	4.62969e+06	5.31503e+06	6.25372e+06	5.07397e+06	5.52971e+06	4.15666e+06
M109/ 1690	6.9467	0.00022791	0.00069324	3309C - 1103P; own - 1103P; so4 - 1103P	1.27066e+06	970829	1.24295e+06	811121	1.6985e+06	1.23412e+06	887302	994383	1.56096e+06	1.54093e+06	537254	730514	762568	574385	1.75508e+06	1.26592e+06	1.52683e+06	1.22823e+06	818137	681762	1.05153e+06	1.15632e+06	1.57719e+06	1.37758e+06	1.18669e+06	1.33849e+06	1.04649e+06	911305	1.38619e+06	1.42949e+06	1.33921e+06	812920	281641	427622	1.40593e+06	1.28952e+06	1.2038e+06	1.25648e+06	1.32898e+06	1.11714e+06	1.40414e+06	1.75235e+06	1.20413e+06	1.49422e+06	1.08443e+06
M54/ 1690	11.51	9.8883e-07	4.8847e-06	3309C - 1103P; own - 1103P; so4 - 1103P	725435	660790	843161	877459	922524	892631	536427	530414	860199	848161	365980	440980	392073	40230.1	976318	709953	758670	741946	581357	424415	782684	645195	1.0118e+06	785361	777966	738693	596607	596362	815937	774272	729631	605427	250263	204575	917224	849568	856908	826589	742255	690035	841611	877405	766927	822623	685355
M83/ 1690	10.365	3.7341e-06	1.6035e-05	3309C - 1103P; own - 1103P; so4 - 1103P	2.82098e+06	2.95581e+06	3.10397e+06	3.49719e+06	3.66309e+06	3.68319e+06	2.10326e+06	2.18425e+06	3.37685e+06	3.44723e+06	1.47968e+06	1.73202e+06	1.55457e+06	1.42414e+06	3.80741e+06	2.68192e+06	3.32823e+06	2.79816e+06	2.04456e+06	1.66964e+06	3.19004e+06	2.59154e+06	3.81493e+06	3.08393e+06	2.93831e+06	2.92259e+06	2.29325e+06	2.27801e+06	3.0768e+06	3.12644e+06	2.9738e+06	2.68552e+06	932731	800094	3.54333e+06	3.36137e+06	3.36661e+06	3.3324e+06	2.89873e+06	2.84904e+06	3.16132e+06	3.80699e+06	3.10117e+06	3.34537e+06	2.61311e+06
M89/ 1690	8.599	3.0401e-05	0.00011035	3309C - 1103P; own - 1103P; so4 - 1103P	633019	566128	732847	818663	832098	786277	481709	470163	760570	716345	284475	383946	344534	314203	866171	568677	744989	633792	518533	336726	653362	574696	856669	670513	672106	645802	456886	470109	697257	691148	626852	591871	166908	214862	810436	751304	719948	720668	654400	622114	662997	881570	679399	751064	580351
M61/ 1690	9.248	1.3972e-05	5.4639e-05	3309C - 1103P; own - 1103P; so4 - 1103P	1.68449e+06	1.78381e+06	2.05521e+06	2.2729e+06	2.37673e+06	2.30058e+06	1.27747e+06	1.31809e+06	2.10358e+06	2.10604e+06	903068	1.03635e+06	1.02244e+06	791927	2.44775e+06	1.6887e+06	2.08321e+06	1.83951e+06	1.5192e+06	1.04272e+06	2.05518e+06	1.62243e+06	2.36998e+06	1.93008e+06	1.94636e+06	1.8614e+06	1.43184e+06	1.36443e+06	1.97135e+06	1.99566e+06	1.74121e+06	1.74032e+06	350069	505536	1.83894e+06	2.21087e+06	2.10395e+06	2.10619e+06	1.83114e+06	1.76114e+06	2.03681e+06	2.39288e+06	1.941e+06	2.10351e+06	1.64261e+06
M152/ 1690	4.3962	0.005584	0.013197	own - 1103P; so4 - 1103P; own - 3309C	2.10032e+06	1.78656e+06	1.58671e+06	1.54351e+06	2.87748e+06	1.7801e+06	931584	1.68147e+06	2.69865e+06	1.79574e+06	1.01914e+06	1.18493e+06	1.14288e+06	1.23932e+06	1.08991e+06	2.34009e+06	1.38998e+06	2.07811e+06	1.01827e+06	1.29901e+06	1.18235e+06	1.61043e+06	3.21742e+06	2.09733e+06	1.42686e+06	1.21249e+06	1.62796e+06	1.59182e+06	2.06131e+06	1.9785e+06	1.98305e+06	1.24445e+06	576211	633052	2.43612e+06	1.59709e+06	2.65959e+06	2.15403e+06	1.69881e+06	1.51728e+06	2.63716e+06	2.71469e+06	2.40084e+06	2.17294e+06	890452
M111/ 1690	10.567	2.9477e-06	1.3175e-05	3309C - 1103P; own - 1103P; so4 - 1103P	1.22401e+06	1.11494e+06	1.32433e+06	1.56199e+06	1.34576e+06	1.65226e+06	946801	928492	1.44271e+06	1.52318e+06	511093	677659	595196	596391	1.72752e+06	1.03266e+06	1.38002e+06	1.27089e+06	1.01757e+06	610952	1.4025e+06	955666	1.52575e+06	1.33302e+06	1.26687e+06	1.25246e+06	1.00544e+06	903636	1.3596e+06	1.34105e+06	1.10315e+06	953021	196786	199625	1.43972e+06	1.349e+06	1.51574e+06	1.28656e+06	1.08649e+06	1.29073e+06	1.20708e+06	1.47606e+06	1.19553e+06	1.46567e+06	956757
M85/ 1690	6.8528	0.00025594	0.0007749	own - 1103P; so4 - 1103P; own - 3309C	349049	559449	634511	778996	700642	751022	317586	365709	468581	747068	162408	353215	323950	200782	702935	590115	674024	609276	441044	288130	660431	483149	880252	404009	622663	631791	370656	476303	427506	575173	416921	533292	192510	183295	725092	621167	626012	745313	442250	510781	587662	727196	627960	716275	64047.5
M135/ 1690	3.3797	0.020388	0.041728	3309C - 1103P; own - 1103P; so4 - 1103P	2.78163e+06	2.96183e+06	3.31159e+06	2.99899e+06	3.79198e+06	3.72508e+06	1.95555e+06	2.02323e+06	3.44597e+06	2.74914e+06	1.20541e+06	1.46512e+06	1.51867e+06	1.35835e+06	3.84022e+06	2.28467e+06	3.2393e+06	2.4686e+06	1.72848e+06	1.51691e+06	2.08869e+06	2.24075e+06	3.79241e+06	2.88784e+06	2.49468e+06	2.39258e+06	2.25546e+06	2.11329e+06	3.10537e+06	3.31573e+06	2.98369e+06	2.49638e+06	880990	907759	3.6088e+06	2.93838e+06	3.40541e+06	3.01363e+06	2.95931e+06	2.90147e+06	3.26206e+06	3.83321e+06	3.10695e+06	60386.5	2.47895e+06
M60/ 1690	9.3802	1.1937e-05	4.7531e-05	3309C - 1103P; own - 1103P; so4 - 1103P	1.86216e+06	1.97255e+06	2.15376e+06	2.37283e+06	2.49293e+06	2.46453e+06	1.3934e+06	1.44345e+06	2.24279e+06	2.28552e+06	957801	1.15623e+06	1.06939e+06	980122	2.55867e+06	1.82102e+06	2.26361e+06	2.0334e+06	1.6351e+06	1.00437e+06	2.17083e+06	1.78696e+06	3.1401e+06	2.05633e+06	1.98116e+06	1.90264e+06	1.57087e+06	1.54147e+06	1.96176e+06	2.14327e+06	2.00426e+06	1.839e+06	463323	714212	2.26817e+06	2.15037e+06	2.15981e+06	2.26981e+06	1.92303e+06	1.93982e+06	2.21021e+06	2.52247e+06	2.11876e+06	2.22763e+06	1.71904e+06
M70/ 1690	8.9333	2.0348e-05	7.683e-05	3309C - 1103P; own - 1103P; so4 - 1103P	2.56696e+06	2.63175e+06	2.94741e+06	3.21237e+06	3.36643e+06	3.24255e+06	1.97116e+06	1.93724e+06	3.12508e+06	3.15389e+06	1.3064e+06	1.55599e+06	1.35779e+06	1.32475e+06	3.45909e+06	2.46328e+06	3.07273e+06	2.65782e+06	2.16743e+06	1.46097e+06	2.89056e+06	2.30405e+06	3.524e+06	2.78488e+06	2.74236e+06	2.63314e+06	2.07929e+06	1.97754e+06	2.77235e+06	2.89227e+06	2.62413e+06	2.45881e+06	859287	851293	3.22551e+06	3.03358e+06	2.91631e+06	3.01926e+06	2.64014e+06	2.61255e+06	2.85138e+06	3.40297e+06	2.78827e+06	3.05152e+06	2.32055e+06
M95/ 1690	6.8263	0.00026446	0.00079703	3309C - 1103P; own - 1103P; so4 - 1103P	975201	946118	1.18111e+06	967664	1.32286e+06	1.14904e+06	709514	757259	1.17285e+06	1.11856e+06	503943	657791	645196	469527	1.31637e+06	932203	1.15932e+06	1.00926e+06	852396	467186	761761	673810	1.35091e+06	886730	1.00928e+06	824913	688064	651286	1.02044e+06	989892	1.01611e+06	715576	223973	263375	1.14473e+06	1.19041e+06	1.2052e+06	1.04387e+06	856780	1.03517e+06	1.1542e+06	1.30666e+06	895726	1.07551e+06	920434
M42/ 1690	6.4718	0.00041033	0.0012199	3309C - 1103P; own - 1103P; so4 - 1103P	363966	575744	683701	684409	684958	657516	383884	392720	543219	571930	287808	243303	231805	229860	620868	511281	709082	594837	401618	299592	660543	443538	657162	543982	486253	552411	463071	386258	586378	656939	484791	593504	127979	170559	630775	562522	713495	708468	560543	511648	702847	723933	540025	641559	547501
M123/ 1690	8.2437	4.6686e-05	0.00016512	3309C - 1103P; own - 1103P; so4 - 1103P	1.59884e+06	1.74533e+06	1.90143e+06	2.11934e+06	2.21478e+06	2.18135e+06	1.27824e+06	1.23423e+06	2.04882e+06	1.97611e+06	811894	971179	929853	876858	2.28042e+06	1.60365e+06	1.93123e+06	1.67337e+06	1.37838e+06	931616	1.89698e+06	1.52117e+06	2.07245e+06	1.83691e+06	1.78246e+06	1.72484e+06	1.30833e+06	1.28992e+06	1.7925e+06	1.88303e+06	1.75296e+06	1.58885e+06	525902	537911	2.13251e+06	1.89576e+06	1.99478e+06	1.9958e+06	1.6896e+06	1.64973e+06	1.90033e+06	2.197e+06	1.7855e+06	2.07144e+06	1.44269e+06
M127/ 1690	9.4627	1.0821e-05	4.4159e-05	3309C - 1103P; own - 1103P; so4 - 1103P	368037	251665	397534	337761	480223	376106	183144	202075	439006	416140	126430	185198	114380	182815	381075	255181	442721	336295	230716	129924	302517	235044	476289	397074	192859	367270	318156	182168	380314	391825	342436	233932	59099.6	120659	430314	432600	364822	424458	157147	297558	389286	431207	312562	368545	294512
M69/ 1690	8.8516	2.2441e-05	8.3772e-05	3309C - 1103P; own - 1103P; so4 - 1103P	4.02211e+06	4.16927e+06	4.69822e+06	4.92812e+06	5.28256e+06	5.15235e+06	3.01297e+06	2.98264e+06	4.80821e+06	4.89714e+06	2.18607e+06	2.49677e+06	2.23574e+06	2.17568e+06	5.46028e+06	3.82756e+06	4.79458e+06	4.1525e+06	3.35629e+06	2.34536e+06	4.64569e+06	3.63753e+06	5.57409e+06	4.27551e+06	4.33563e+06	4.0947e+06	3.28433e+06	3.25272e+06	4.31058e+06	4.48342e+06	4.15246e+06	3.78922e+06	1.38804e+06	1.24815e+06	5.07138e+06	4.79159e+06	4.80497e+06	4.66529e+06	4.15315e+06	4.04657e+06	4.60758e+06	5.413e+06	4.34907e+06	4.72376e+06	3.66227e+06
M68/ 1690	5.1244	0.0022197	0.0057189	3309C - 1103P; own - 1103P; so4 - 1103P	1.82103e+06	1.91308e+06	2.13801e+06	2.24444e+06	2.37716e+06	2.3265e+06	1.38716e+06	1.36745e+06	2.22713e+06	2.28073e+06	1.02572e+06	1.12555e+06	1.104e+06	1.0235e+06	2.48524e+06	1.73822e+06	2.13378e+06	1.8194e+06	1.5442e+06	981756	2.12919e+06	1.68392e+06	100135	1.95155e+06	1.96089e+06	1.81575e+06	1.49989e+06	1.50128e+06	1.96019e+06	2.08978e+06	1.85281e+06	1.76861e+06	623481	617864	2.29857e+06	2.10851e+06	2.15883e+06	2.14828e+06	1.84856e+06	1.78131e+06	2.07291e+06	2.40181e+06	2.00753e+06	2.18853e+06	1.49496e+06
M88/ 1690	8.148	5.2423e-05	0.00018418	3309C - 1103P; own - 1103P; so4 - 1103P	7.88527e+06	8.11059e+06	9.16754e+06	9.90721e+06	1.0406e+07	9.82657e+06	5.79432e+06	5.34274e+06	9.36652e+06	9.10263e+06	3.89448e+06	4.5182e+06	4.09268e+06	3.53969e+06	1.00241e+07	7.13847e+06	9.16081e+06	7.90969e+06	6.51752e+06	3.46641e+06	8.62501e+06	6.95171e+06	9.9972e+06	8.43503e+06	8.23854e+06	7.82709e+06	6.00584e+06	6.05892e+06	6.85092e+06	8.65479e+06	8.07609e+06	7.45672e+06	1.88544e+06	2.24653e+06	9.65697e+06	9.14982e+06	9.24943e+06	9.14952e+06	8.05812e+06	7.38439e+06	8.92009e+06	1.05289e+07	8.25422e+06	9.37784e+06	6.71003e+06
M53/ 1690	7.2167	0.00016343	0.00051376	3309C - 1103P; own - 1103P; so4 - 1103P	531458	441789	578222	547436	496505	618261	369689	374613	71245.4	647758	276086	85269.3	281444	263727	578272	478786	527274	517533	372863	288021	588782	493389	752758	500328	529220	404706	404982	329397	571371	529195	531883	400988	133173	170728	580472	567144	607207	557662	525225	461846	572643	697285	510003	630067	448677
M87/ 1690	4.6889	0.0038513	0.0094768	3309C - 1103P; own - 1103P; so4 - 1103P	593501	303003	499065	533817	674946	628266	459867	424331	649455	492206	230225	225261	200328	280704	467379	497607	684909	637866	445867	241989	450447	341560	19919.3	560694	464716	535758	458322	315647	665031	423852	518226	404019	220601	173992	642947	532669	537796	592801	589752	381394	518276	708694	615727	542891	492071
M67/ 1690	8.782	2.4397e-05	9.0559e-05	3309C - 1103P; own - 1103P; so4 - 1103P	2.09912e+06	2.12851e+06	2.19753e+06	2.62847e+06	2.69722e+06	2.63536e+06	1.58864e+06	1.59316e+06	2.41458e+06	2.61253e+06	1.07562e+06	1.35957e+06	1.20506e+06	1.20464e+06	2.85414e+06	1.86464e+06	2.46543e+06	2.13034e+06	1.82632e+06	1.16339e+06	2.33397e+06	1.87332e+06	2.80628e+06	2.25527e+06	2.20944e+06	2.13685e+06	1.61187e+06	1.71793e+06	2.24298e+06	2.35829e+06	2.08479e+06	2.01215e+06	720234	603338	2.55255e+06	2.53732e+06	2.37939e+06	2.40511e+06	2.17491e+06	2.1067e+06	2.24838e+06	2.74568e+06	2.25503e+06	2.47936e+06	1.86713e+06
M155/ 1690	6.6042	0.00034814	0.0010397	3309C - 1103P; own - 1103P; so4 - 1103P	265148	362382	376779	357651	349355	511335	289034	253405	442820	353668	162843	120058	182092	152455	427119	333723	286609	402017	260054	170503	382688	243689	529893	295422	331926	306109	262037	262418	413937	307980	404808	261720	116076	86717.3	421838	421844	404500	442704	342956	341777	322120	481053	365459	459520	273861
M110/ 1690	7.9104	6.9959e-05	0.00023692	3309C - 1103P; own - 1103P; so4 - 1103P	3.14423e+06	4.14758e+06	4.00181e+06	5.12337e+06	5.05791e+06	4.94528e+06	2.316e+06	2.08236e+06	3.83407e+06	4.65739e+06	1.69526e+06	2.22997e+06	1.89769e+06	1.36078e+06	5.55576e+06	3.85177e+06	4.8748e+06	4.39908e+06	3.52002e+06	2.00504e+06	4.33706e+06	3.27252e+06	5.15483e+06	3.86343e+06	2.68178e+06	4.11306e+06	2.24947e+06	2.00721e+06	3.69816e+06	4.00564e+06	3.42551e+06	3.93255e+06	1.18816e+06	798018	4.93942e+06	4.49307e+06	5.06345e+06	4.65029e+06	3.39192e+06	4.15414e+06	4.18334e+06	4.21826e+06	4.57108e+06	5.17308e+06	2.84116e+06
M41/ 1690	6.0094	0.00073002	0.0020763	3309C - 1103P; own - 1103P; so4 - 1103P	1.84008e+06	1.78743e+06	2.11618e+06	2.27704e+06	2.26029e+06	2.16147e+06	1.45334e+06	1.40082e+06	2.06402e+06	2.21034e+06	952643	676719	1.01457e+06	873212	2.36547e+06	1.58417e+06	2.28399e+06	1.85036e+06	1.54734e+06	1.05614e+06	1.9525e+06	1.42901e+06	2.63039e+06	1.87625e+06	2.0688e+06	1.20321e+06	1.51226e+06	1.42695e+06	2.11761e+06	1.70879e+06	1.94766e+06	1.6056e+06	437602	267160	2.10535e+06	2.17636e+06	1.64403e+06	2.06656e+06	1.50141e+06	1.57563e+06	1.52409e+06	2.21464e+06	2.07206e+06	1.90307e+06	1.51986e+06
M96/ 1690	8.8838	2.1591e-05	8.106e-05	3309C - 1103P; own - 1103P; so4 - 1103P	3.07913e+06	3.17315e+06	3.49801e+06	3.66745e+06	3.94283e+06	3.98058e+06	2.33422e+06	2.25738e+06	3.74393e+06	3.66062e+06	1.62297e+06	1.5668e+06	1.72516e+06	1.70393e+06	4.22481e+06	2.91604e+06	3.67188e+06	3.10691e+06	1.81161e+06	1.69064e+06	3.382e+06	2.77407e+06	4.06388e+06	3.28066e+06	3.23995e+06	3.09204e+06	2.50829e+06	2.46214e+06	3.33641e+06	3.20971e+06	3.21703e+06	2.93796e+06	1.01346e+06	969246	3.8817e+06	3.63624e+06	3.61767e+06	3.63679e+06	3.07631e+06	2.76835e+06	3.1266e+06	4.08089e+06	2.7514e+06	3.56433e+06	2.76449e+06
M59/ 1690	3.2379	0.024431	0.049086	1103P - own; so4 - own	435820	494205	145198	679394	406505	664944	232724	493909	808313	1.02454e+06	399577	638657	465443	548854	465690	479977	193339	363038	336519	372108	682238	562326	294174	429458	257190	233880	263242	433420	272134	170044	312820	307255	468800	454870	485774	639682	296738	508833	443830	386416	422352	443480	516648	331542	379324
M163/ 1690	44.487	9.1782e-20	6.0301e-17	3309C - 1103P; own - 1103P; so4 - 1103P; own - 3309C; own - so4	487245	400671	376750	284952	290816	512490	573999	1.03372e+06	1.23166e+06	1.45977e+06	170013	142018	121387	117583	326712	370167	183151	386254	219349	329408	134380	171413	845008	656651	868489	873394	106155	176384	225754	199744	239135	134888	145430	200239	958964	966659	863428	899502	769442	762647	441872	468473	337083	368276	231662
M149/ 1720	12.152	4.7486e-07	2.5999e-06	3309C - 1103P; own - 1103P; so4 - 1103P; own - 3309C; own - so4	359210	425962	319039	296450	290405	417897	217148	591526	724997	721987	291785	235799	275772	194653	436920	231594	257683	403792	371949	299603	304178	360987	451447	475130	426227	611920	156882	194584	274736	325430	313349	231401	323060	300184	716985	596022	599789	439770	553403	502961	313185	465199	368732	355894	189663
M192/ 1720	13.88	6.8306e-08	4.4433e-07	3309C - 1103P; own - 1103P; so4 - 1103P; own - 3309C; own - so4	1.13095e+06	1.07123e+06	890352	929127	718990	996557	858899	1.52523e+06	1.72049e+06	1.99791e+06	689159	923542	598287	699401	972557	984504	791505	1.16532e+06	890321	917449	837699	1.01894e+06	1.22916e+06	1.15505e+06	1.35312e+06	1.52645e+06	533357	559703	944477	957762	849211	838394	822574	790337	1.7927e+06	1.41564e+06	1.65127e+06	1.31818e+06	1.48307e+06	1.28304e+06	972948	1.11252e+06	1.04618e+06	1.03369e+06	1.00354e+06
M177/ 1720	13.987	6.0685e-08	4.0273e-07	3309C - 1103P; own - 1103P; so4 - 1103P; own - 3309C; own - so4	505568	468643	328426	334321	282489	466366	363928	699733	848613	904191	330680	406498	286945	269062	506703	303460	279429	367348	413539	412256	307554	341231	593188	481564	616366	714733	210192	246682	384034	419026	382642	267988	368325	377464	855816	695726	728269	519496	659415	594812	462282	501576	489211	474337	347291
M163/ 1720	32.045	1.6122e-15	1.5132e-13	3309C - 1103P; own - 1103P; so4 - 1103P; own - 3309C; own - so4	274216	212221	162253	98564.9	130717	284472	302552	648596	754710	895974	36168.5	92823.4	15435.3	56546.5	148853	256197	170693	190048	119314	146215	75970	129968	555701	313331	523936	545730	96123.8	55006.7	209980	158972	92284.4	117671	105782	97950.7	421574	554935	90073	555464	464169	469251	212935	289719	240234	164962	174672
M142/ 1740	16.458	4.1799e-09	3.9231e-08	3309C - 1103P; own - 1103P; so4 - 1103P; own - 3309C; own - so4	648298	621191	454471	321214	263802	467126	678669	1.3002e+06	1.22866e+06	1.5328e+06	308445	286065	259951	285135	175712	445833	5839.23	508539	191108	384815	189825	288675	1.95936e+06	688111	1.11594e+06	921916	281243	259297	439197	380150	234491	315485	388232	359986	1.20299e+06	956444	1.29315e+06	1.28582e+06	1.12849e+06	1.02772e+06	559072	551801	343298	459080	457094
M141/ 1740	20.315	7.857e-11	1.0983e-09	3309C - 1103P; own - 1103P; so4 - 1103P; own - 3309C; own - so4	296345	237754	301122	166356	143973	130696	315461	596763	496788	783996	139293	150509	97703.8	135988	71623.4	201378	94715.8	207027	42590	161619	62376	141508	849405	370156	582350	525423	116613	100063	126538	115235	148792	80650.8	111826	59465.1	419723	601370	658644	636204	545548	317083	217672	216473	250062	211775	182686
M172/ 1740	19.746	1.392e-10	1.7932e-09	3309C - 1103P; own - 1103P; so4 - 1103P; own - 3309C; own - so4	453826	312520	286406	144675	165610	271320	232872	617592	665644	726847	161125	173540	91369.6	131027	105639	271474	80997.6	277525	95963.9	139394	60844.1	125953	962380	326518	601178	528072	112592	108548	167346	149323	127376	101674	101911	122598	566841	563747	622419	595073	568312	515641	199339	268787	254915	268979	189386
M157/ 1740	20.374	7.4047e-11	1.0864e-09	3309C - 1103P; own - 1103P; so4 - 1103P; own - 3309C; own - so4	1.86326e+06	1.35947e+06	1.25762e+06	942774	901875	1.26332e+06	1.65852e+06	2.64111e+06	2.67349e+06	3.24829e+06	824633	832371	666826	715356	422768	1.07698e+06	504425	1.13654e+06	313040	840817	365326	889032	4.00993e+06	1.47801e+06	2.38879e+06	2.19609e+06	704515	633550	930026	876793	640532	665797	720399	798242	2.33849e+06	2.53556e+06	2.58175e+06	2.60297e+06	1.96772e+06	2.21485e+06	1.08179e+06	1.35664e+06	1.09499e+06	1.1191e+06	974250
M70/ 1760	11.084	1.6178e-06	7.6468e-06	1103P - 3309C; 1103P - own; 1103P - so4; 3309C - own; so4 - own	706597	879031	910607	1.00616e+06	874782	896800	879730	1.20808e+06	1.52922e+06	1.56146e+06	726986	1.58498e+06	693126	1.3797e+06	1.29398e+06	1.19785e+06	802562	900934	1.09535e+06	594314	1.29902e+06	1.07626e+06	827014	773312	655814	763637	638696	716043	853084	950795	666448	665107	630353	940183	718445	655962	493396	630912	533262	821679	677588	1.00392e+06	684602	764559	818410
M56/ 1760	9.3838	1.1885e-05	4.7531e-05	1103P - 3309C; 1103P - own; 1103P - so4; so4 - own	559243	484528	682666	773647	610933	567110	660786	897019	1.13702e+06	933488	1.12073e+06	1.33297e+06	902879	1.1472e+06	663050	1.0068e+06	438421	717198	1.05306e+06	639024	1.02854e+06	690510	713079	584267	526415	517597	390167	640843	572165	779273	627516	517409	811971	1.04289e+06	520980	707262	427360	461299	404381	560690	713399	518649	467487	458548	589707
M83/ 1760	11.522	9.7605e-07	4.8581e-06	1103P - 3309C; 1103P - own; 1103P - so4; 3309C - own; so4 - own	515318	664656	667520	743266	506859	722026	733757	844115	1.06775e+06	1.26569e+06	959201	1.32697e+06	764845	528967	963191	756133	481323	620833	769224	469561	1.06278e+06	766582	720593	591877	473847	564243	538320	521683	529785	727824	383685	512905	481250	704344	494069	609260	281006	444369	489546	576355	463577	567219	415615	574439	467593
M55/ 1760	16.188	5.5732e-09	5.1572e-08	1103P - 3309C; 1103P - own; 1103P - so4; 3309C - own	914615	920509	1.18648e+06	1.16429e+06	565331	713207	868083	1.23097e+06	1.41439e+06	1.65775e+06	2.02607e+06	2.22113e+06	1.78764e+06	1.98092e+06	1.15591e+06	785966	686471	564937	1.65984e+06	711979	1.46609e+06	770173	934157	789316	825489	898702	622122	662453	949448	871942	522724	611998	1.66805e+06	1.64923e+06	576438	929232	677732	774670	513224	937904	614325	441959	691677	838315	554445
M69/ 1760	35.661	8.0599e-17	1.3238e-14	1103P - 3309C; 1103P - own; 1103P - so4; 3309C - own; so4 - own	1.11484e+06	1.47086e+06	1.61947e+06	1.85291e+06	1.63532e+06	1.75633e+06	1.01456e+06	1.4064e+06	1.99348e+06	1.9945e+06	3.22605e+06	3.75128e+06	2.94608e+06	3.34359e+06	2.8187e+06	2.13535e+06	1.36097e+06	1.65325e+06	2.68236e+06	1.91053e+06	2.46468e+06	1.83137e+06	830387	555735	959038	1.10436e+06	1.77432e+06	1.52537e+06	799702	1.38526e+06	1.46345e+06	1.44157e+06	3.27648e+06	3.20407e+06	1.10512e+06	1.27662e+06	460686	903046	1.17496e+06	1.0278e+06	1.11821e+06	1.49409e+06	1.22405e+06	1.07304e+06	1.53607e+06
M71/ 1760	33.214	6.026e-16	6.5985e-14	1103P - 3309C; 1103P - own; 1103P - so4; 3309C - own; so4 - own	399947	402362	487328	548251	331873	385840	198746	278556	427080	390349	1.09088e+06	1.0556e+06	1.07079e+06	1.14013e+06	717530	505608	471236	567571	855130	404891	660655	467353	243866	197603	174482	257551	562247	401518	295554	331880	393536	419194	963991	758615	299094	239730	187248	246325	275516	256052	529968	350345	260215	302970	460031
M68/ 1760	13.545	9.9089e-08	5.9726e-07	1103P - 3309C; 1103P - own; 1103P - so4; 3309C - own; 3309C - so4	290824	977158	465853	800217	502096	634769	402430	470656	603053	894318	1.27472e+06	1.8015e+06	1.59801e+06	1.71942e+06	2.40619e+06	685835	2.75673e+06	423553	1.38926e+06	710438	1.43757e+06	497374	2.70946e+06	373227	280039	334587	471297	516696	397618	559165	567583	968093	2.43854e+06	2.29661e+06	550798	410367	301177	282011	334540	207261	510096	532668	455537	381424	541433
M82/ 1760	42.341	4.4725e-19	1.4692e-16	1103P - 3309C; 1103P - own; 1103P - so4; 3309C - own; so4 - own	402699	688928	856063	955396	504561	922847	315622	443296	594579	556425	1.8597e+06	2.23843e+06	1.96804e+06	2.1388e+06	1.32492e+06	838879	709625	808787	1.56684e+06	830143	1.4024e+06	724427	276669	249274	249879	274572	750190	910935	605628	711885	762000	721061	2.07572e+06	2.11545e+06	305355	453424	245034	260397	341631	372785	612293	473916	493551	459342	786347
M67/ 1760	39.923	2.7927e-18	6.116e-16	1103P - 3309C; 1103P - own; 1103P - so4; 3309C - own; so4 - own	494818	756026	778126	1.02533e+06	862987	846628	324511	335656	624394	711217	1.88394e+06	2.36644e+06	1.99052e+06	2.12241e+06	1.46385e+06	1.09766e+06	1.04234e+06	762273	1.62906e+06	1.04719e+06	1.25318e+06	976450	384090	362654	265581	450766	888748	771553	484062	453222	696948	768829	2.23015e+06	2.26935e+06	682917	608949	262006	311556	417565	472567	700400	779439	592485	561969	879480
M95/ 1760	34.222	2.6105e-16	3.4302e-14	1103P - 3309C; 1103P - own; 1103P - so4; 3309C - own; so4 - own	310985	241899	702622	445399	779604	475796	273096	178373	281709	563500	1.85548e+06	1.5127e+06	1.30378e+06	1.10926e+06	1.21898e+06	616238	492595	499500	1.03561e+06	833037	920451	873252	243040	192735	277140	377229	718715	854187	488002	434969	417628	577442	1.66235e+06	1.71873e+06	714605	410549	262508	157447	297938	360691	498079	491768	333497	445470	554869
M135/ 1760	3.5358	0.016708	0.035071	1103P - own; 1103P - so4	192025	2.42509e+06	43763.3	379126	17960.8	120568	12403.6	58594.9	59593.8	731165	738572	1.49996e+06	4.29623e+06	2.00438e+06	5.56396e+06	26143.5	1.09035e+07	35833.7	307676	655151	1.74657e+06	149674	1.18756e+07	4353.9	20257	27341.7	100332	12809.9	28170.5	94776.1	11724.8	2.46341e+06	6.89714e+06	6.44573e+06	1.2661e+06	24227.5	23218.9	5823.66	325377	25018.7	60379.8	43730.8	14700	11968.1	119097
M151/ 1760	4.1108	0.0080286	0.018252	1103P - own; 1103P - so4; 3309C - so4	580043	5.60745e+06	117047	1.03125e+06	33824.3	369288	11562.1	267347	222098	2.85111e+06	1.67948e+06	4.35386e+06	9.89432e+06	6.51419e+06	1.4558e+07	75483.2	2.26613e+07	103487	5.22166e+06	2.36191e+06	3.57727e+06	182284	3.36223e+06	8188.03	59711.8	107630	28772.7	35004.8	104433	33199.5	92147	6.25139e+06	9.05547e+06	1.30338e+07	3.26209e+06	54159.9	60164.5	17430.2	907606	44276.5	134125	81594.9	22631.1	38731.8	285726
M133/ 1760	4.4856	0.0049843	0.011995	1103P - own; 1103P - so4; 3309C - so4	967143	1.11271e+07	158278	2.21534e+06	122777	567334	32135.8	379292	303616	4.18756e+06	6.33788e+06	6.50852e+06	1.67773e+07	1.01755e+07	1.94186e+07	134214	2.23125e+07	174698	6.88707e+06	3.57133e+06	1.05195e+07	447254	2.38845e+07	18636.4	98105.2	198437	36838.6	70401.1	85058.4	54937.1	124795	1.13104e+07	1.67909e+07	1.99736e+07	5.58954e+06	157362	114214	68718.3	1.78371e+06	127104	220898	143719	54785.3	43301.2	689184
M152/ 1770	4.3191	0.0061593	0.014452	1103P - own; 1103P - so4; 3309C - so4	254951	576407	358790	424783	270669	357895	226307	382295	367914	538227	792628	720952	1.54645e+06	561027	2.07741e+06	321735	3.91064e+06	369339	643192	342675	634179	294427	5.1651e+06	228434	159875	243609	184456	248169	232040	314858	147386	1.00733e+06	3.15797e+06	2.86762e+06	532409	205669	201689	142138	288016	288622	217315	231990	280551	175319	168468
M105/ 1770	3.523	0.016983	0.035535	1103P - own; 1103P - so4	170775	480467	248105	276911	98199.1	214146	93274.7	189357	532142	377968	557197	200514	370338	345973	597832	293228	1.858e+06	229335	570027	277385	411957	101616	382295	124537	106336	335186	141832	108486	227842	60030.6	168552	289819	1.36027e+06	1.35011e+06	540370	266059	211242	263921	172874	284594	235748	194010	106848	117041	160933
M65/ 1780	13.832	7.2067e-08	4.642e-07	1103P - 3309C; 1103P - own; 1103P - so4; 3309C - own; so4 - own	298059	372642	778449	789268	439687	550921	181777	149346	252343	266706	1.37842e+06	1.4201e+06	864790	878551	564519	406169	195285	253311	698172	557600	790576	755306	259768	231615	210686	185246	485550	489207	159526	196986	197596	330968	1.22444e+06	1.29386e+06	422863	447409	240384	180636	333741	374517	258460	211813	198226	210643	387342
M91/ 1780	10.802	2.2423e-06	1.0302e-05	1103P - 3309C; 1103P - own; 1103P - so4; 3309C - own	3.91816e+06	4.57482e+06	1.1226e+07	1.15652e+07	6.9773e+06	7.57117e+06	2.60337e+06	2.80324e+06	3.67119e+06	3.29164e+06	1.82849e+07	1.56947e+07	1.17088e+07	1.22954e+07	8.00473e+06	6.53698e+06	3.13509e+06	2.78868e+06	9.89146e+06	8.65258e+06	1.00476e+07	9.81338e+06	5.15883e+06	82356.8	3.71455e+06	3.66709e+06	7.19576e+06	7.04399e+06	3.30568e+06	3.31808e+06	4.79981e+06	4.92069e+06	1.64555e+07	1.7026e+07	8.64329e+06	8.29469e+06	4.34035e+06	4.37543e+06	5.74406e+06	5.96824e+06	3.91706e+06	4.58255e+06	2.92413e+06	3.10795e+06	7.72514e+06
M164/ 1780	11.342	1.2007e-06	5.8869e-06	1103P - 3309C; 1103P - own; 1103P - so4; 3309C - own; so4 - own	658033	531532	2.0346e+06	1.7158e+06	916847	1.06854e+06	359217	312461	573394	537091	2.86828e+06	3.67358e+06	2.02921e+06	1.94899e+06	1.10433e+06	1.04427e+06	496315	361024	1.64677e+06	1.52206e+06	1.50931e+06	1.80504e+06	552297	431011	641262	634619	1.1356e+06	1.18877e+06	371008	535235	865183	645327	2.91288e+06	3.15998e+06	1.35478e+06	1.37456e+06	755229	577616	959333	1.03959e+06	432556	599110	393732	316351	1.24705e+06
M104/ 1820	21.04	3.8178e-11	6.2707e-10	1103P - 3309C; 1103P - own; 3309C - own; so4 - 3309C; so4 - own	1.71989e+06	1.79613e+06	3.11623e+06	2.98157e+06	4.3115e+06	4.4332e+06	2.71381e+06	2.82521e+06	2.8027e+06	2.90454e+06	4.95079e+06	5.48393e+06	4.70715e+06	5.01729e+06	3.45678e+06	3.42433e+06	2.48469e+06	2.62043e+06	4.4409e+06	3.86415e+06	3.25745e+06	3.39088e+06	3.28658e+06	2.34969e+06	2.1918e+06	2.21878e+06	3.10445e+06	3.13267e+06	6.53554e+06	7.1637e+06	2.54132e+06	2.53806e+06	3.97174e+06	4.29697e+06	2.72488e+06	2.28007e+06	2.84191e+06	3.10317e+06	3.51305e+06	3.66926e+06	4.54212e+06	4.80329e+06	6.14322e+06	6.0774e+06	3.97558e+06
M105/ 1820	5.8747	0.00086405	0.0023953	1103P - 3309C; 1103P - own; 1103P - so4	1.19817e+06	916700	1.28617e+06	1.27079e+06	1.70905e+06	1.58017e+06	1.32595e+06	1.59392e+06	1.87543e+06	1.97407e+06	1.47194e+06	1.37182e+06	1.57797e+06	1.50943e+06	2.1142e+06	1.73119e+06	1.69512e+06	1.55013e+06	1.69775e+06	1.68657e+06	1.71071e+06	1.87149e+06	2.39597e+06	1.457e+06	1.70039e+06	1.63625e+06	1.5758e+06	1.29297e+06	1.63271e+06	1.59175e+06	1.30912e+06	1.12838e+06	1.82189e+06	1.79221e+06	1.85844e+06	1.51663e+06	1.3715e+06	1.31657e+06	1.67183e+06	1.42775e+06	1.81906e+06	1.9042e+06	1.95327e+06	1.8344e+06	1.18217e+06
M157/ 1820	20.369	7.4412e-11	1.0864e-09	own - 1103P; so4 - 1103P; own - 3309C; own - so4	409818	232671	329995	271310	284460	410809	661745	980527	992581	1.16785e+06	224325	194725	135617	141314	31426.1	353548	48308.9	266831	30609.9	206671	28595.6	137388	477704	418170	559073	554767	162004	207833	198452	281219	89458.9	143837	101481	114442	374116	898953	375121	877748	242370	597674	240210	402678	344040	364862	161203
M142/ 1820	23.882	2.4327e-12	8.412e-11	3309C - 1103P; own - 1103P; so4 - 1103P; own - 3309C; own - so4	368503	177806	316525	143199	269283	430078	560648	874205	839648	1.14531e+06	147305	185834	69948.3	169896	101628	315053	25066.1	190317	36175.3	208900	27251.6	163694	328803	433617	498213	485473	113232	113070	215359	251605	117191	98957.6	72895.7	83638	346725	770031	361666	750718	262508	591607	213406	330223	259220	255569	116438
M60/ 1850	13.554	9.8094e-08	5.9674e-07	3309C - 1103P; own - 1103P; so4 - 1103P; own - so4	2.0038e+07	2.29794e+07	1.39209e+07	1.56666e+07	1.65112e+07	1.75712e+07	1.74789e+07	2.02946e+07	2.35782e+07	2.45473e+07	9.68643e+06	1.18339e+07	8.47953e+06	9.46086e+06	1.91855e+07	1.52456e+07	2.00724e+07	1.80392e+07	1.22154e+07	1.22948e+07	1.21551e+07	1.39691e+07	1.75067e+07	1.54581e+07	8.10433e+06	2.31006e+07	7.25068e+06	9.91526e+06	1.43415e+07	1.81799e+07	1.04748e+07	1.4862e+07	5.51815e+06	9.11477e+06	2.03241e+07	1.62599e+07	1.39057e+07	1.73977e+07	1.58301e+07	1.55739e+07	1.34284e+07	1.92527e+07	8.92491e+06	1.17332e+07	8.62191e+06
M74/ 1850	8.0973	5.5748e-05	0.00019482	3309C - 1103P; own - 1103P; so4 - 1103P	1.73959e+06	1.90686e+06	1.27498e+06	1.3555e+06	1.52233e+06	1.51641e+06	1.61583e+06	1.85302e+06	1.97598e+06	2.08705e+06	998220	1.14937e+06	874771	924787	1.49039e+06	1.19289e+06	1.55377e+06	1.47623e+06	1.02469e+06	1.00943e+06	976974	1.13655e+06	1.15083e+06	1.15062e+06	592114	1.73398e+06	628696	998253	1.21924e+06	1.42507e+06	804443	1.144e+06	412854	286874	1.46279e+06	1.16302e+06	1.02049e+06	1.17994e+06	1.23746e+06	1.22493e+06	881361	1.48208e+06	759113	1.03942e+06	688072
M45/ 1850	9.3423	1.2487e-05	4.9421e-05	3309C - 1103P; own - 1103P; so4 - 1103P	1.96108e+06	2.39789e+06	1.47331e+06	1.75896e+06	1.7868e+06	1.85197e+06	1.71441e+06	2.12711e+06	2.45167e+06	2.53644e+06	1.00959e+06	1.25744e+06	1.13721e+06	1.24321e+06	1.71098e+06	1.57196e+06	1.94936e+06	1.90581e+06	1.39217e+06	1.40297e+06	1.26103e+06	1.62338e+06	1.62682e+06	1.52608e+06	891890	2.19564e+06	842569	1.22559e+06	1.57535e+06	2.10504e+06	1.03845e+06	1.62302e+06	594303	603054	2.01064e+06	1.65366e+06	1.4327e+06	1.78788e+06	1.63394e+06	1.3184e+06	1.34091e+06	2.20775e+06	1.07258e+06	1.34635e+06	976307
M56/ 1850	6.1848	0.00058652	0.0016901	3309C - 1103P; own - 1103P; so4 - 1103P	1.92994e+06	2.0093e+06	1.454e+06	1.58246e+06	1.60219e+06	1.65528e+06	1.87838e+06	1.98165e+06	1.93029e+06	2.30209e+06	1.06285e+06	1.31849e+06	863452	878422	1.63565e+06	1.29186e+06	1.7162e+06	1.53537e+06	1.13969e+06	1.10188e+06	1.12454e+06	1.45752e+06	1.17015e+06	1.28469e+06	666902	1.65287e+06	814552	1.17257e+06	1.29623e+06	1.55285e+06	889296	1.35037e+06	520633	259094	1.47526e+06	1.10804e+06	932665	1.34347e+06	1.39827e+06	1.26399e+06	953609	1.7122e+06	907158	1.31174e+06	797448
M87/ 1850	4.2377	0.0068305	0.015914	3309C - 1103P; own - 1103P; 3309C - so4; own - so4	3.83351e+06	2.82162e+06	2.64321e+06	2.61073e+06	2.59052e+06	3.25721e+06	3.16124e+06	3.42568e+06	4.37255e+06	4.59517e+06	1.72992e+06	2.02845e+06	1.63351e+06	1.51482e+06	3.2935e+06	2.52157e+06	3.24817e+06	3.10323e+06	1.47719e+06	1.97855e+06	1.77578e+06	2.44239e+06	2.4717e+06	2.69329e+06	1.39082e+06	1.88727e+06	1.30038e+06	1.81456e+06	2.35784e+06	3.11186e+06	1.67529e+06	2.50387e+06	967443	448054	3.3454e+06	2.71809e+06	2.09234e+06	2.46308e+06	2.30149e+06	2.77038e+06	2.31405e+06	1.4302e+06	1.55271e+06	2.3309e+06	1.14591e+06
M73/ 1850	4.1014	0.008125	0.018407	3309C - 1103P; own - 1103P; own - so4	1.24778e+07	1.53802e+07	8.53768e+06	1.06416e+07	1.06155e+07	1.15394e+07	1.22685e+07	1.40517e+07	1.31212e+07	1.57561e+07	6.82374e+06	8.64647e+06	4.14552e+06	6.53118e+06	9.8774e+06	8.97137e+06	1.0169e+07	1.01767e+07	5.79011e+06	6.20951e+06	7.62318e+06	6.95593e+06	5.61175e+06	9.05179e+06	3.74386e+06	1.34055e+07	2.83971e+06	6.16604e+06	6.2779e+06	8.90901e+06	2.70458e+06	8.90358e+06	1.92337e+06	1.58934e+06	7.08335e+06	6.3588e+06	6.10501e+06	7.97296e+06	2.64971e+06	8.12562e+06	4.56655e+06	5.14098e+06	4.64364e+06	8.2073e+06	2.7034e+06
M55/ 1850	4.5728	0.0044619	0.010863	1103P - own; 3309C - own	4.91663e+06	5.45418e+06	4.1129e+06	4.08888e+06	4.5532e+06	4.49274e+06	4.87122e+06	5.4138e+06	5.0847e+06	5.21513e+06	3.898e+06	3.94838e+06	3.38698e+06	3.12659e+06	3.24032e+06	3.0035e+06	3.35576e+06	3.43633e+06	2.66603e+06	2.74024e+06	2.97792e+06	3.73211e+06	1.81466e+06	2.96609e+06	2.09903e+06	3.6648e+06	2.4492e+06	3.55786e+06	3.23136e+06	4.31077e+06	2.06542e+06	2.91199e+06	1.42269e+06	1.67885e+06	1.98528e+06	2.31545e+06	2.04767e+06	2.51597e+06	2.57395e+06	2.90657e+06	1.75966e+06	3.65406e+06	2.2944e+06	3.46028e+06	1.83248e+06
M43/ 1850	5.1047	0.0022754	0.0057944	1103P - own; 3309C - own; 3309C - so4	3.91116e+06	4.07304e+06	2.93837e+06	3.03131e+06	2.69065e+06	3.05889e+06	3.683e+06	4.21283e+06	4.05479e+06	4.1611e+06	2.82505e+06	2.46547e+06	2.15553e+06	1.90485e+06	2.32155e+06	2.21538e+06	2.04287e+06	2.26952e+06	1.67736e+06	2.01108e+06	2.16313e+06	2.70504e+06	1.12843e+06	1.93463e+06	1.49192e+06	1.42485e+06	1.51295e+06	2.43971e+06	2.39044e+06	2.96699e+06	1.04428e+06	1.85064e+06	911871	999173	277723	1.50202e+06	691775	1.43275e+06	1.21295e+06	1.43692e+06	980747	1.08669e+06	1.51126e+06	2.45938e+06	948489
M171/ 1850	6.1666	0.00059999	0.0017214	1103P - own; 3309C - own; so4 - own	620522	787934	621002	658648	702561	629659	734150	777270	622457	713278	573862	591692	558143	518137	263437	340943	268127	366142	242044	310059	331239	8503.84	226127	203677	205235	308027	373526	555347	345454	576829	191793	266139	171258	223653	57424.3	105043	64532.8	107132	126558	314653	5893.94	385524	204452	434102	164395
M102/ 1850	7.4838	0.00011777	0.00037929	1103P - own; 1103P - so4; 3309C - own; so4 - own	1.08923e+06	1.17955e+06	937498	982094	1.03505e+06	1.00135e+06	1.15554e+06	1.18898e+06	982756	1.06164e+06	939941	1.05155e+06	894102	795331	313234	498388	451132	586177	392586	526237	554904	820752	426042	485941	385828	532547	541101	904470	615796	925076	269037	456500	250895	451498	182018	222210	192481	208790	304441	468802	11326.8	550358	452432	737707	287053
M143/ 1850	8.0589	5.8411e-05	0.00020305	1103P - own; 3309C - own; so4 - own	1.86569e+06	1.88394e+06	1.57771e+06	1.72057e+06	1.83613e+06	1.72653e+06	2.09666e+06	2.21988e+06	1.81965e+06	1.73605e+06	1.65907e+06	1.83106e+06	1.47397e+06	1.34356e+06	671564	802568	805432	930630	706956	951358	915436	1.46015e+06	719431	722505	689588	943374	960210	1.41824e+06	1.10177e+06	1.52732e+06	542942	782726	435015	845949	318609	61524.8	387176	387709	577094	869766	11695.1	1.06158e+06	804355	1.39033e+06	517595
M89/ 1850	12.34	3.8359e-07	2.154e-06	1103P - own; 3309C - own; so4 - own	3.13424e+06	3.45044e+06	2.81006e+06	2.92005e+06	3.13804e+06	2.91833e+06	3.40802e+06	3.61327e+06	3.0335e+06	3.11118e+06	2.96319e+06	3.06495e+06	2.61183e+06	2.36213e+06	1.34347e+06	1.55581e+06	1.38076e+06	1.68417e+06	1.19518e+06	1.55394e+06	1.70157e+06	2.44102e+06	1.2521e+06	1.49134e+06	1.21027e+06	1.52772e+06	1.71224e+06	2.60323e+06	1.89382e+06	2.57353e+06	951807	1.45874e+06	859941	1.38655e+06	529655	724815	645149	834821	1.02688e+06	1.41111e+06	450726	1.83262e+06	1.35624e+06	2.23723e+06	797474
M70/ 1850	9.6939	8.2269e-06	3.3994e-05	1103P - own; 3309C - own; so4 - own	4.86351e+06	5.27159e+06	4.1861e+06	4.32988e+06	4.64305e+06	4.45454e+06	5.11564e+06	5.46294e+06	4.64651e+06	4.88992e+06	4.24905e+06	4.38528e+06	3.72425e+06	3.44703e+06	2.48065e+06	2.63172e+06	2.5339e+06	2.93246e+06	2.09791e+06	2.41132e+06	2.73709e+06	3.7152e+06	1.86224e+06	2.41748e+06	1.93707e+06	2.8522e+06	2.46912e+06	3.87612e+06	2.8426e+06	4.019e+06	1.64585e+06	2.52005e+06	1.34033e+06	1.82514e+06	961553	1.62712e+06	1.30273e+06	1.72734e+06	1.86233e+06	2.48167e+06	997816	3.0528e+06	2.16184e+06	3.32412e+06	1.51227e+06
M101/ 1850	4.977	0.002674	0.0067813	1103P - own; 1103P - so4; 3309C - own; 3309C - so4	1.05932e+07	1.28778e+07	1.20955e+07	6.08033e+06	8.77116e+06	7.34503e+06	1.0139e+07	1.22002e+07	8.83109e+06	8.06582e+06	1.14291e+07	9.51512e+06	8.69576e+06	4.79933e+06	5.46806e+06	5.12563e+06	4.35698e+06	5.69931e+06	3.35713e+06	5.01592e+06	5.89545e+06	8.26393e+06	5.6652e+06	4.50072e+06	4.58332e+06	877014	6.34011e+06	9.25219e+06	7.8641e+06	5.59181e+06	3.94311e+06	3.29207e+06	2.62164e+06	5.06322e+06	1.4865e+06	2.42993e+06	2.50829e+06	3.00045e+06	3.98501e+06	4.7263e+06	1.80472e+06	6.82845e+06	5.76872e+06	9.05012e+06	3.32253e+06
M185/ 1850	12.101	5.0309e-07	2.7316e-06	1103P - own; 3309C - own; so4 - own	2.61057e+06	2.89403e+06	2.2893e+06	2.42517e+06	2.58286e+06	2.42494e+06	2.89211e+06	2.9281e+06	2.4548e+06	2.56828e+06	2.38977e+06	2.50182e+06	2.04359e+06	1.89437e+06	1.02859e+06	1.24499e+06	1.03028e+06	1.30509e+06	1.01832e+06	1.30241e+06	1.1924e+06	2.05806e+06	993367	1.19881e+06	969578	1.26411e+06	1.4097e+06	2.18659e+06	1.5445e+06	2.19553e+06	755883	1.15896e+06	658109	1.13281e+06	417858	506515	501116	639055	828979	1.19789e+06	299132	1.50379e+06	1.11014e+06	1.92581e+06	693380
M157/ 1850	7.9985	6.2855e-05	0.00021621	1103P - own; 1103P - so4; 3309C - own; so4 - own	3.8129e+06	4.18053e+06	3.42288e+06	3.52703e+06	3.78297e+06	3.60917e+06	4.16425e+06	4.40457e+06	3.60026e+06	3.58742e+06	3.53078e+06	3.71114e+06	3.01443e+06	2.81589e+06	1.47076e+06	1.84431e+06	1.5986e+06	2.12374e+06	1.50454e+06	1.91632e+06	1.95293e+06	2.96433e+06	1.55563e+06	1.7514e+06	1.43658e+06	1.85852e+06	2.03353e+06	3.23361e+06	2.26565e+06	3.23851e+06	1.09137e+06	1.77329e+06	968207	1.61171e+06	651339	801401	728343	963615	1.17477e+06	1.66263e+06	41642.8	2.17467e+06	1.57772e+06	2.75615e+06	956082
M183/ 1850	11.883	6.4537e-07	3.3889e-06	1103P - own; 3309C - own; so4 - own	2.78558e+06	3.12547e+06	2.51376e+06	2.62015e+06	2.84128e+06	2.66085e+06	3.06716e+06	3.28593e+06	2.61995e+06	2.76496e+06	2.59303e+06	2.73783e+06	2.2735e+06	2.12687e+06	1.07731e+06	1.30066e+06	1.15138e+06	1.57122e+06	1.11847e+06	1.40116e+06	1.4672e+06	2.22029e+06	1.1718e+06	1.23318e+06	1.05765e+06	1.3653e+06	1.53178e+06	2.33819e+06	1.66003e+06	2.39076e+06	736395	1.22716e+06	693212	1.24102e+06	467071	596792	554969	615504	892966	1.29139e+06	350370	1.58222e+06	1.1255e+06	2.03476e+06	738169
M83/ 1850	7.7582	8.4211e-05	0.00028085	1103P - own; 3309C - own; so4 - own	2.1098e+06	2.15592e+06	1.73763e+06	1.75702e+06	1.96423e+06	1.97009e+06	2.23127e+06	2.2381e+06	1.98449e+06	2.06577e+06	1.9086e+06	1.75359e+06	1.65028e+06	1.49238e+06	923187	1.11215e+06	1.04188e+06	1.23205e+06	905313	924470	974388	1.52217e+06	674976	901329	724226	1.15524e+06	1.04042e+06	1.65105e+06	1.1765e+06	1.59762e+06	557654	950696	334326	855559	349388	484788	488173	638313	573134	885722	172039	1.14418e+06	777914	1.36085e+06	580901
M228/ 1850	11.645	8.4733e-07	4.2823e-06	1103P - own; 3309C - own; so4 - own	916990	1.17349e+06	905063	925042	998848	978128	1.13911e+06	1.18331e+06	1.00067e+06	1.01134e+06	907528	954171	781482	651301	375688	457702	409264	568870	305426	466710	529952	838666	345140	486154	360952	523745	569532	907079	633538	833574	309687	437659	247815	453966	156036	166103	164473	218634	305090	408926	118623	582821	434677	714827	242175
M97/ 1850	7.0185	0.0002086	0.00064041	1103P - own; 3309C - own; so4 - own	1.10083e+06	1.67011e+06	1.28673e+06	1.13389e+06	1.29118e+06	844515	1.06779e+06	1.56876e+06	1.0342e+06	1.28689e+06	1.43265e+06	1.18949e+06	1.08835e+06	773028	501020	607658	620491	615899	526792	461802	712157	996395	2.97105e+06	413560	430596	624978	503194	1.15448e+06	461693	906441	232224	595675	221967	268987	257489	201563	213765	282674	397022	520568	67277.9	543353	559197	525332	274590
M71/ 1850	12.795	2.2931e-07	1.3333e-06	1103P - own; 3309C - own; so4 - own	1.44175e+06	1.53064e+06	1.27351e+06	1.37106e+06	1.37987e+06	1.33804e+06	1.45238e+06	1.58129e+06	1.49887e+06	1.5437e+06	1.3891e+06	1.41649e+06	1.20372e+06	1.13811e+06	788968	793323	827079	830822	752653	725562	984615	1.11258e+06	588337	730712	555618	819425	748438	1.09561e+06	870806	1.23033e+06	445216	775596	343373	590979	204983	492502	356395	402361	505481	630661	315202	834581	715624	1.07956e+06	495471
M199/ 1850	7.7957	8.0453e-05	0.00026968	1103P - own; 3309C - own; so4 - own	901932	987425	652659	826265	905625	743709	901046	956471	846629	819308	790696	805704	716699	662668	333615	433263	370129	409231	286825	380042	447559	556420	149.722	353441	311565	408478	433821	746333	519381	514233	221141	412805	192311	397200	126774	182679	132435	19057	208664	352919	107848	503402	332367	573527	200314
M88/ 1850	8.9716	1.9437e-05	7.4243e-05	1103P - own; 1103P - so4; 3309C - own; so4 - own	2.54007e+07	2.70203e+07	2.31781e+07	2.32235e+07	2.41887e+07	2.3504e+07	2.71539e+07	2.97418e+07	2.4171e+07	2.45654e+07	2.46672e+07	2.41422e+07	2.15171e+07	1.94332e+07	1.04739e+07	1.24997e+07	1.08154e+07	1.4652e+07	1.01836e+07	1.33549e+07	1.37202e+07	1.99065e+07	1.00613e+07	1.23899e+07	1.0229e+07	1.25397e+07	1.39566e+07	2.10055e+07	1.5597e+07	2.12306e+07	7.61759e+06	1.20246e+07	6.45866e+06	1.04105e+07	2.3618e+06	5.89449e+06	5.03676e+06	6.60644e+06	7.16944e+06	1.12301e+07	526864	1.44674e+07	1.15572e+07	1.80437e+07	7.11969e+06
M95/ 1850	10.386	3.645e-06	1.5861e-05	1103P - own; 3309C - own; so4 - own	625461	523686	540568	348758	764258	644776	138740	440744	746950	522245	637536	492251	563240	457989	381655	236161	215573	304644	269560	325121	297148	335145	333760	337462	196530	42627.9	340952	393976	428314	376655	196444	311527	158820	313578	86288.7	142865	141244	174859	193126	256924	78971.2	359469	268165	394229	121283
M69/ 1850	22.702	7.5259e-12	1.9017e-10	1103P - 3309C; 1103P - own; 1103P - so4; 3309C - own; so4 - own	2.72123e+06	2.94868e+06	2.46798e+06	2.65106e+06	2.76063e+06	2.62956e+06	2.76713e+06	3.05783e+06	2.9717e+06	2.99522e+06	2.863e+06	3.1351e+06	2.41318e+06	2.40349e+06	2.43059e+06	1.83946e+06	1.97443e+06	1.94053e+06	2.13592e+06	1.80379e+06	2.72197e+06	2.67026e+06	737959	1.57132e+06	1.10874e+06	1.68349e+06	1.53609e+06	2.31584e+06	1.7877e+06	2.48654e+06	1.38834e+06	1.96559e+06	1.15521e+06	1.09743e+06	905088	1.09162e+06	973449	1.07562e+06	1.34989e+06	1.46327e+06	1.03687e+06	2.08392e+06	1.44937e+06	2.11858e+06	1.27455e+06
M115/ 1850	4.2845	0.0064364	0.015049	1103P - own; 3309C - own	1.55583e+06	1.29202e+06	1.20079e+06	1.30913e+06	118341	1.57937e+06	1.8234e+06	1.85324e+06	1.58808e+06	1.81019e+06	1.57294e+06	1.41408e+06	1.29739e+06	940903	695051	872884	735359	854054	579503	868598	745257	1.42141e+06	772885	724212	670464	699245	872598	1.32238e+06	929248	1.29432e+06	462987	706483	369234	837526	299437	372437	384701	413648	491395	806183	292650	1.02082e+06	800382	1.15295e+06	297520
M67/ 1850	16.141	5.8583e-09	5.3457e-08	1103P - own; 1103P - so4; 3309C - own; 3309C - so4; so4 - own	703028	822906	694615	681695	678916	578543	783389	879162	779513	795777	736566	789503	561636	611660	486617	419814	334861	476488	434316	367917	499802	675182	119853	329382	289783	399919	141240	77512.2	423923	483485	250084	407642	272574	333750	119313	231166	165202	173740	248028	293149	119705	286039	333067	511546	228992
M85/ 1850	9.0321	1.8079e-05	6.946e-05	1103P - own; 3309C - own; so4 - own	695098	742319	631694	693814	626524	718136	824587	849798	755512	786091	710188	717884	560920	564397	314079	268483	335229	364112	205425	369492	407479	489612	47809.8	364552	246970	337289	388928	608162	404767	568329	201454	259942	145058	296911	64242.5	136950	83845.4	150385	188148	344266	123197	409926	339428	523009	189506
M129/ 1850	6.3464	0.00047956	0.0014003	1103P - own; 3309C - own; so4 - own	1.16164e+06	1.3684e+06	1.12838e+06	1.1364e+06	1.14477e+06	1.07727e+06	1.27525e+06	1.3848e+06	1.14825e+06	1.18992e+06	1.13765e+06	1.16928e+06	989023	828075	164038	169328	505874	625514	479955	566500	612632	938652	113697	503887	409517	575084	662617	947478	704420	1.05156e+06	245709	561743	278709	482560	212238	255176	201801	269722	376286	521660	17366	656739	509668	868578	237768
[truncated: 84 more rows]
[truncated: 87 more columns]

## Sheet: supplemental table 4
Table S4: List of the metabolic features that are significantly different due to irrigation treatments in 2018.
[truncated: 87 more rows]
[truncated: 87 more columns]

## Sheet: Supplemental table 5
Supplemental table 6: Cross validation details for the PLS-DA analysis for the root-system differences in 2018.

[truncated: 3 more sheets: supplemental table 6, supplemental table 7., supplemental table 8]
